# Supplementary material for: Transcriptomic Analyses Reveal B-Cell Translocation Gene 2 as a Potential Therapeutic Target in Ovarian Cancer
Source: Frontiers journal article supplement (doi:10.3389/fonc.2021.681250), 2021-08-17
Supplement: Data_Sheet_1.xls [file Data_Sheet_1.xls]

## Sheet: TableS1_RNASeq_OV_TCGAvsGTex
sample	sample_type.samples
TCGA-04-1365-01	Primary Tumor
TCGA-24-2033-01	Primary Tumor
TCGA-04-1341-01	Primary Tumor
TCGA-29-1702-01	Primary Tumor
TCGA-23-1116-01	Primary Tumor
TCGA-36-1575-01	Primary Tumor
TCGA-24-1422-01	Primary Tumor
TCGA-29-1774-01	Primary Tumor
TCGA-36-1580-01	Primary Tumor
TCGA-04-1347-01	Primary Tumor
TCGA-13-1411-01	Primary Tumor
TCGA-25-1877-01	Primary Tumor
TCGA-25-2393-01	Primary Tumor
TCGA-61-2012-01	Primary Tumor
TCGA-09-0364-01	Primary Tumor
TCGA-10-0938-01	Primary Tumor
TCGA-24-1849-01	Primary Tumor
TCGA-25-2399-01	Primary Tumor
TCGA-29-1761-01	Primary Tumor
TCGA-04-1517-01	Primary Tumor
TCGA-09-1674-01	Primary Tumor
TCGA-24-2026-01	Primary Tumor
TCGA-04-1331-01	Primary Tumor
TCGA-04-1337-01	Primary Tumor
TCGA-04-1338-01	Primary Tumor
TCGA-13-0888-01	Primary Tumor
TCGA-20-0991-01	Primary Tumor
TCGA-24-0966-01	Primary Tumor
TCGA-59-2352-01	Primary Tumor
TCGA-OY-A56Q-01	Primary Tumor
TCGA-09-2044-01	Primary Tumor
TCGA-10-0933-01	Primary Tumor
TCGA-13-1507-01	Primary Tumor
TCGA-24-0982-01	Primary Tumor
TCGA-24-1552-01	Primary Tumor
TCGA-24-1928-01	Primary Tumor
TCGA-29-1778-01	Primary Tumor
TCGA-13-1481-01	Primary Tumor
TCGA-24-2261-01	Primary Tumor
TCGA-25-1329-01	Primary Tumor
TCGA-25-2400-01	Primary Tumor
TCGA-31-1950-01	Primary Tumor
TCGA-36-1576-01	Primary Tumor
TCGA-61-1741-01	Primary Tumor
TCGA-09-1661-01	Primary Tumor
TCGA-20-1686-01	Primary Tumor
TCGA-25-1634-01	Primary Tumor
TCGA-25-2392-01	Primary Tumor
TCGA-29-2414-01	Primary Tumor
TCGA-13-0923-01	Primary Tumor
TCGA-13-1487-01	Primary Tumor
TCGA-24-1565-01	Primary Tumor
TCGA-24-2280-01	Primary Tumor
TCGA-25-1324-01	Primary Tumor
TCGA-29-1766-01	Primary Tumor
TCGA-30-1861-01	Primary Tumor
TCGA-61-2102-01	Primary Tumor
TCGA-09-1665-01	Primary Tumor
TCGA-13-0768-01	Primary Tumor
TCGA-13-0804-01	Primary Tumor
TCGA-13-0891-01	Primary Tumor
TCGA-13-1409-01	Primary Tumor
TCGA-13-1498-01	Primary Tumor
TCGA-23-1032-01	Primary Tumor
TCGA-24-1558-01	Primary Tumor
TCGA-25-1319-01	Primary Tumor
TCGA-25-1627-01	Primary Tumor
TCGA-25-1630-01	Primary Tumor
TCGA-25-1631-01	Primary Tumor
TCGA-04-1343-01	Primary Tumor
TCGA-09-2053-01	Primary Tumor
TCGA-13-0724-01	Primary Tumor
TCGA-24-1850-01	Primary Tumor
TCGA-24-2024-01	Primary Tumor
TCGA-25-1323-01	Primary Tumor
TCGA-29-1693-01	Primary Tumor
TCGA-WR-A838-01	Primary Tumor
TCGA-10-0928-01	Primary Tumor
TCGA-13-0727-01	Primary Tumor
TCGA-13-0730-01	Primary Tumor
TCGA-24-1469-01	Primary Tumor
TCGA-24-1544-01	Primary Tumor
TCGA-25-1623-01	Primary Tumor
TCGA-25-1635-01	Primary Tumor
TCGA-25-2396-01	Primary Tumor
TCGA-25-2398-01	Primary Tumor
TCGA-25-2409-01	Primary Tumor
TCGA-61-1733-01	Primary Tumor
TCGA-61-1740-01	Primary Tumor
TCGA-61-2097-01	Primary Tumor
TCGA-04-1332-01	Primary Tumor
TCGA-13-0885-01	Primary Tumor
TCGA-13-1489-01	Primary Tumor
TCGA-24-1463-01	Primary Tumor
TCGA-24-1464-01	Primary Tumor
TCGA-24-2288-01	Primary Tumor
TCGA-25-1871-01	Primary Tumor
TCGA-10-0936-01	Primary Tumor
TCGA-24-1545-01	Primary Tumor
TCGA-25-1312-01	Primary Tumor
TCGA-29-1781-01	Primary Tumor
TCGA-04-1530-01	Primary Tumor
TCGA-24-1418-01	Primary Tumor
TCGA-24-1430-01	Primary Tumor
TCGA-24-2038-01	Primary Tumor
TCGA-24-2281-01	Primary Tumor
TCGA-24-2289-01	Primary Tumor
TCGA-25-1632-01	Primary Tumor
TCGA-30-1714-01	Primary Tumor
TCGA-09-0367-01	Primary Tumor
TCGA-13-0886-01	Primary Tumor
TCGA-13-A5FT-01	Primary Tumor
TCGA-23-1022-01	Primary Tumor
TCGA-24-1424-01	Primary Tumor
TCGA-24-1431-01	Primary Tumor
TCGA-24-1562-01	Primary Tumor
TCGA-24-1564-01	Primary Tumor
TCGA-24-2020-01	Primary Tumor
TCGA-25-1628-01	Primary Tumor
TCGA-61-2000-01	Primary Tumor
TCGA-13-0795-01	Primary Tumor
TCGA-13-1492-01	Primary Tumor
TCGA-23-2078-01	Primary Tumor
TCGA-24-1563-01	Primary Tumor
TCGA-24-1604-01	Primary Tumor
TCGA-24-1843-01	Primary Tumor
TCGA-24-2254-01	Primary Tumor
TCGA-25-1317-01	Primary Tumor
TCGA-25-1625-01	Primary Tumor
TCGA-29-1690-01	Primary Tumor
TCGA-29-A5NZ-01	Primary Tumor
TCGA-57-1586-01	Primary Tumor
TCGA-10-0927-01	Primary Tumor
TCGA-13-0762-01	Primary Tumor
TCGA-13-0920-01	Primary Tumor
TCGA-13-1496-01	Primary Tumor
TCGA-20-1683-01	Primary Tumor
TCGA-24-1924-01	Primary Tumor
TCGA-24-2035-01	Primary Tumor
TCGA-25-1320-01	Primary Tumor
TCGA-25-1321-01	Primary Tumor
TCGA-25-1626-01	Primary Tumor
TCGA-30-1862-01	Primary Tumor
TCGA-61-1914-01	Primary Tumor
TCGA-61-2009-01	Primary Tumor
TCGA-13-1509-01	Primary Tumor
TCGA-23-1030-01	Primary Tumor
TCGA-23-1119-01	Primary Tumor
TCGA-24-1844-01	Primary Tumor
TCGA-25-1633-01	Primary Tumor
TCGA-25-2401-01	Primary Tumor
TCGA-30-1857-01	Primary Tumor
TCGA-09-2048-01	Primary Tumor
TCGA-10-0926-01	Primary Tumor
TCGA-13-0760-01	Primary Tumor
TCGA-13-1505-01	Primary Tumor
TCGA-23-1111-01	Primary Tumor
TCGA-23-1809-01	Primary Tumor
TCGA-24-0970-01	Primary Tumor
TCGA-29-1776-01	Primary Tumor
TCGA-36-1578-01	Primary Tumor
TCGA-36-1581-01	Primary Tumor
TCGA-57-1994-01	Primary Tumor
TCGA-59-2354-01	Primary Tumor
TCGA-61-1907-01	Primary Tumor
TCGA-61-2094-01	Primary Tumor
TCGA-04-1356-01	Primary Tumor
TCGA-09-2056-01	Primary Tumor
TCGA-13-1510-01	Primary Tumor
TCGA-23-1109-01	Primary Tumor
TCGA-24-1419-01	Primary Tumor
TCGA-25-1313-01	Primary Tumor
TCGA-25-1322-01	Primary Tumor
TCGA-29-1695-01	Primary Tumor
TCGA-29-1697-01	Primary Tumor
TCGA-61-2098-01	Primary Tumor
TCGA-04-1364-01	Primary Tumor
TCGA-09-1667-01	Primary Tumor
TCGA-13-0883-01	Primary Tumor
TCGA-13-1483-01	Primary Tumor
TCGA-20-0987-01	Primary Tumor
TCGA-24-1423-01	Primary Tumor
TCGA-25-1326-01	Primary Tumor
TCGA-30-1855-01	Primary Tumor
TCGA-30-1866-01	Primary Tumor
TCGA-30-1891-01	Primary Tumor
TCGA-5X-AA5U-01	Primary Tumor
TCGA-61-2111-01	Primary Tumor
TCGA-04-1536-01	Primary Tumor
TCGA-13-0899-01	Primary Tumor
TCGA-13-1495-01	Primary Tumor
TCGA-23-1120-01	Primary Tumor
TCGA-24-1471-01	Primary Tumor
TCGA-25-2042-01	Primary Tumor
TCGA-29-2425-01	Primary Tumor
TCGA-29-2427-01	Primary Tumor
TCGA-31-1956-01	Primary Tumor
TCGA-61-1738-01	Primary Tumor
TCGA-61-1917-01	Primary Tumor
TCGA-04-1362-01	Primary Tumor
TCGA-13-0900-01	Primary Tumor
TCGA-13-1408-01	Primary Tumor
TCGA-13-1488-01	Primary Tumor
TCGA-23-1107-01	Primary Tumor
TCGA-23-1123-01	Primary Tumor
TCGA-24-0968-01	Primary Tumor
TCGA-24-1434-01	Primary Tumor
TCGA-25-1870-01	Primary Tumor
TCGA-25-2397-01	Primary Tumor
TCGA-29-1762-01	Primary Tumor
TCGA-59-2348-01	Primary Tumor
TCGA-61-1728-01	Primary Tumor
TCGA-09-1662-01	Primary Tumor
TCGA-09-2054-01	Primary Tumor
TCGA-13-0908-01	Primary Tumor
TCGA-24-0975-01	Primary Tumor
TCGA-24-1427-01	Primary Tumor
TCGA-24-1549-01	Primary Tumor
TCGA-24-2267-01	Primary Tumor
TCGA-29-1783-01	Primary Tumor
TCGA-29-2428-01	Primary Tumor
TCGA-30-1853-01	Primary Tumor
TCGA-30-1860-01	Primary Tumor
TCGA-31-1951-01	Primary Tumor
TCGA-59-2355-01	Primary Tumor
TCGA-61-1919-01	Primary Tumor
TCGA-04-1361-01	Primary Tumor
TCGA-04-1648-01	Primary Tumor
TCGA-09-1666-01	Primary Tumor
TCGA-09-1668-01	Primary Tumor
TCGA-09-1670-01	Primary Tumor
TCGA-13-1410-01	Primary Tumor
TCGA-24-1435-01	Primary Tumor
TCGA-24-1436-01	Primary Tumor
TCGA-24-1474-01	Primary Tumor
TCGA-24-1548-01	Primary Tumor
TCGA-24-2262-01	Primary Tumor
TCGA-25-2391-01	Primary Tumor
TCGA-29-1699-01	Primary Tumor
TCGA-57-1583-01	Primary Tumor
TCGA-57-1585-01	Primary Tumor
TCGA-61-2092-01	Primary Tumor
TCGA-09-0369-01	Primary Tumor
TCGA-13-0890-01	Primary Tumor
TCGA-13-1499-01	Primary Tumor
TCGA-20-1682-01	Primary Tumor
TCGA-24-1104-01	Primary Tumor
TCGA-24-1616-01	Primary Tumor
TCGA-24-2290-01	Primary Tumor
TCGA-24-2297-01	Primary Tumor
TCGA-29-1701-01	Primary Tumor
TCGA-29-1703-01	Primary Tumor
TCGA-57-1993-01	Primary Tumor
TCGA-61-1910-01	Primary Tumor
TCGA-61-2110-01	Primary Tumor
TCGA-09-0366-01	Primary Tumor
TCGA-13-0714-01	Primary Tumor
TCGA-13-0726-01	Primary Tumor
TCGA-13-0911-01	Primary Tumor
TCGA-23-1114-01	Primary Tumor
TCGA-24-2271-01	Primary Tumor
TCGA-24-2298-01	Primary Tumor
TCGA-25-1316-01	Primary Tumor
TCGA-29-1784-01	Primary Tumor
TCGA-29-1785-01	Primary Tumor
TCGA-3P-A9WA-01	Primary Tumor
TCGA-59-A5PD-01	Primary Tumor
TCGA-61-1911-01	Primary Tumor
TCGA-61-2101-01	Primary Tumor
TCGA-VG-A8LO-01	Primary Tumor
TCGA-09-1669-01	Primary Tumor
TCGA-13-0897-01	Primary Tumor
TCGA-24-1417-01	Primary Tumor
TCGA-24-1470-01	Primary Tumor
TCGA-24-1567-01	Primary Tumor
TCGA-24-2023-01	Primary Tumor
TCGA-25-1318-01	Primary Tumor
TCGA-29-1710-01	Primary Tumor
TCGA-29-1770-01	Primary Tumor
TCGA-61-2095-01	Primary Tumor
TCGA-04-1651-01	Primary Tumor
TCGA-23-1122-01	Primary Tumor
TCGA-24-0979-01	Primary Tumor
TCGA-24-1551-01	Primary Tumor
TCGA-24-1553-01	Primary Tumor
TCGA-24-1603-01	Primary Tumor
TCGA-24-1930-01	Primary Tumor
TCGA-29-1698-01	Primary Tumor
TCGA-36-1571-01	Primary Tumor
TCGA-61-1743-01	Primary Tumor
TCGA-61-2003-01	Primary Tumor
TCGA-61-2104-01	Primary Tumor
TCGA-61-2113-01	Primary Tumor
TCGA-04-1357-01	Primary Tumor
TCGA-04-1542-01	Primary Tumor
TCGA-13-0800-01	Primary Tumor
TCGA-13-0919-01	Primary Tumor
TCGA-13-1482-01	Primary Tumor
TCGA-13-1511-01	Primary Tumor
TCGA-23-1024-01	Primary Tumor
TCGA-30-1892-01	Primary Tumor
TCGA-31-1953-01	Primary Tumor
TCGA-36-1568-01	Primary Tumor
TCGA-36-1569-01	Primary Tumor
TCGA-09-1659-01	Primary Tumor
TCGA-13-0905-01	Primary Tumor
TCGA-13-1407-01	Primary Tumor
TCGA-13-2060-01	Primary Tumor
TCGA-20-1684-01	Primary Tumor
TCGA-24-1413-01	Primary Tumor
TCGA-24-1467-01	Primary Tumor
TCGA-24-1560-01	Primary Tumor
TCGA-24-1923-01	Primary Tumor
TCGA-24-2027-01	Primary Tumor
TCGA-29-1691-01	Primary Tumor
TCGA-59-2351-01	Primary Tumor
TCGA-61-1900-01	Primary Tumor
TCGA-61-2016-01	Primary Tumor
TCGA-61-2088-01	Primary Tumor
TCGA-09-1673-01	Primary Tumor
TCGA-09-2045-01	Primary Tumor
TCGA-10-0934-01	Primary Tumor
TCGA-13-0765-01	Primary Tumor
TCGA-13-0906-01	Primary Tumor
TCGA-13-1501-01	Primary Tumor
TCGA-24-1103-01	Primary Tumor
TCGA-24-1428-01	Primary Tumor
TCGA-24-1555-01	Primary Tumor
TCGA-24-1556-01	Primary Tumor
TCGA-24-2036-01	Primary Tumor
TCGA-25-1315-01	Primary Tumor
TCGA-29-1768-01	Primary Tumor
TCGA-57-1582-01	Primary Tumor
TCGA-04-1655-01	Primary Tumor
TCGA-13-0797-01	Primary Tumor
TCGA-13-0916-01	Primary Tumor
TCGA-13-1405-01	Primary Tumor
TCGA-13-1477-01	Primary Tumor
TCGA-13-1512-01	Primary Tumor
TCGA-23-2081-01	Primary Tumor
TCGA-24-1550-01	Primary Tumor
TCGA-24-1557-01	Primary Tumor
TCGA-24-1842-01	Primary Tumor
TCGA-31-1959-01	Primary Tumor
TCGA-36-1570-01	Primary Tumor
TCGA-04-1519-01	Primary Tumor
TCGA-13-0720-01	Primary Tumor
TCGA-13-0893-01	Primary Tumor
TCGA-13-1403-01	Primary Tumor
TCGA-13-1404-01	Primary Tumor
TCGA-13-1485-01	Primary Tumor
TCGA-23-1027-01	Primary Tumor
TCGA-23-1113-01	Primary Tumor
TCGA-36-1574-01	Primary Tumor
TCGA-61-1998-01	Primary Tumor
TCGA-OY-A56P-01	Primary Tumor
TCGA-13-1497-01	Primary Tumor
TCGA-24-2293-01	Primary Tumor
TCGA-29-1705-01	Primary Tumor
TCGA-29-1777-01	Primary Tumor
TCGA-31-1944-01	Primary Tumor
TCGA-57-1584-01	Primary Tumor
TCGA-61-1724-01	Primary Tumor
TCGA-04-1350-01	Primary Tumor
TCGA-13-0801-01	Primary Tumor
TCGA-20-1687-01	Primary Tumor
TCGA-23-1029-01	Primary Tumor
TCGA-24-1546-01	Primary Tumor
TCGA-24-2019-01	Primary Tumor
TCGA-61-2002-01	Primary Tumor
TCGA-04-1514-01	Primary Tumor
TCGA-13-0924-01	Primary Tumor
TCGA-13-1506-01	Primary Tumor
TCGA-20-1685-01	Primary Tumor
TCGA-23-1021-01	Primary Tumor
TCGA-23-1026-01	Primary Tumor
TCGA-23-1118-01	Primary Tumor
TCGA-23-2077-01	Primary Tumor
TCGA-23-2084-01	Primary Tumor
TCGA-24-1425-01	Primary Tumor
TCGA-24-1846-01	Primary Tumor
TCGA-29-1694-01	Primary Tumor
TCGA-29-1711-01	Primary Tumor
TCGA-61-1736-01	Primary Tumor
TCGA-61-1918-01	Primary Tumor
TCGA-04-1348-01	Primary Tumor
TCGA-10-0931-01	Primary Tumor
TCGA-10-0937-01	Primary Tumor
TCGA-13-0725-01	Primary Tumor
TCGA-13-0799-01	Primary Tumor
TCGA-30-1718-01	Primary Tumor
TCGA-59-2350-01	Primary Tumor
TCGA-23-1028-01	Primary Tumor
TCGA-24-1426-01	Primary Tumor
TCGA-29-1696-01	Primary Tumor
TCGA-29-1763-01	Primary Tumor
TCGA-36-1577-01	Primary Tumor
TCGA-61-1995-01	Primary Tumor
TCGA-09-2051-01	Primary Tumor
TCGA-13-0766-01	Primary Tumor
TCGA-13-0887-01	Primary Tumor
TCGA-23-1110-01	Primary Tumor
TCGA-24-1845-01	Primary Tumor
TCGA-25-1314-01	Primary Tumor
TCGA-61-1737-01	Primary Tumor
TCGA-13-0901-01	Primary Tumor
TCGA-29-1769-01	Primary Tumor
TCGA-59-2363-01	Primary Tumor
TCGA-61-1725-01	Primary Tumor
TCGA-61-2008-01	Primary Tumor
TCGA-61-2109-01	Primary Tumor
TCGA-13-0884-01	Primary Tumor
TCGA-29-1688-01	Primary Tumor
TCGA-25-1328-01	Primary Tumor
TCGA-25-2404-01	Primary Tumor
TCGA-61-1721-01	Primary Tumor
TCGA-24-1105-01	Primary Tumor
TCGA-24-1416-01	Primary Tumor
TCGA-31-1946-01	Primary Tumor
GTEX-S4UY-1026-SM-4AD53	Normal
GTEX-P78B-1926-SM-3P616	Normal
GTEX-P4PP-2426-SM-3P61L	Normal
GTEX-12WSB-2226-SM-5GCOS	Normal
GTEX-XYKS-1726-SM-4E3IO	Normal
GTEX-11DXX-1426-SM-5GIDU	Normal
GTEX-131YS-2226-SM-5P9G8	Normal
GTEX-13QIC-1526-SM-5IJFL	Normal
GTEX-ZP4G-0626-SM-4WWF1	Normal
GTEX-YJ8O-1026-SM-5CVM5	Normal
GTEX-P4QT-2426-SM-3NMCL	Normal
GTEX-ZYFG-1726-SM-5GZZB	Normal
GTEX-13VXT-1526-SM-5LU3J	Normal
GTEX-ZC5H-2026-SM-5CVN2	Normal
GTEX-PWN1-2426-SM-48TDD	Normal
GTEX-X15G-1726-SM-4PQZN	Normal
GTEX-13O3O-2726-SM-5KM35	Normal
GTEX-Y3IK-2026-SM-4YCDG	Normal
GTEX-WWYW-2726-SM-4MVOP	Normal
GTEX-PLZ4-2826-SM-3P617	Normal
GTEX-WXYG-1426-SM-4ONCK	Normal
GTEX-1269C-1826-SM-5N9E1	Normal
GTEX-OHPK-2426-SM-3MJGH	Normal
GTEX-11VI4-1026-SM-5EQM1	Normal
GTEX-Y114-1726-SM-4TT7U	Normal
GTEX-11ZTS-1926-SM-5CVLA	Normal
GTEX-WEY5-0626-SM-4LMIA	Normal
GTEX-13N11-0526-SM-5IJFI	Normal
GTEX-13W3W-1526-SM-5LU5I	Normal
GTEX-YFC4-2726-SM-5IFJW	Normal
GTEX-WYBS-2426-SM-4ONDI	Normal
GTEX-1399S-2126-SM-5J2MH	Normal
GTEX-13D11-1126-SM-5KLYS	Normal
GTEX-POMQ-1426-SM-3P61D	Normal
GTEX-12WSG-1426-SM-5FQUK	Normal
GTEX-T5JW-0426-SM-4DM7M	Normal
GTEX-12WSK-1926-SM-5LZVK	Normal
GTEX-XMD3-2326-SM-4AT5H	Normal
GTEX-13QBU-1526-SM-5LU3W	Normal
GTEX-WYVS-1526-SM-4OND4	Normal
GTEX-Q734-0726-SM-48TZP	Normal
GTEX-11ZVC-1426-SM-5EGGA	Normal
GTEX-12WSJ-1226-SM-5LU91	Normal
GTEX-ZZPU-2126-SM-5EGIU	Normal
GTEX-RU72-2226-SM-46MUE	Normal
GTEX-XV7Q-1426-SM-4BRWA	Normal
GTEX-146FH-2526-SM-5Q5BP	Normal
GTEX-UJHI-1226-SM-4IHLR	Normal
GTEX-139D8-2426-SM-5KM3A	Normal
GTEX-11GSP-0226-SM-5A5KV	Normal
GTEX-11EMC-1726-SM-5H11P	Normal
GTEX-13PL7-2326-SM-5L3FY	Normal
GTEX-ZVT3-2626-SM-5GU5L	Normal
GTEX-11ZTT-1826-SM-5CVLN	Normal
GTEX-145ME-1226-SM-5SIB6	Normal
GTEX-ZLWG-0926-SM-4WWC3	Normal
GTEX-RTLS-2326-SM-46MUH	Normal
GTEX-RWS6-1026-SM-47JXD	Normal
GTEX-11XUK-1626-SM-5GU5O	Normal
GTEX-13FTX-0926-SM-5IFF7	Normal
GTEX-T2IS-2026-SM-4DM6W	Normal
GTEX-13U4I-2126-SM-5LU55	Normal
GTEX-T6MO-1126-SM-4DM5D	Normal
GTEX-QVJO-3126-SM-4R1KC	Normal
GTEX-WI4N-2526-SM-4OOSE	Normal
GTEX-X4EO-2426-SM-4QASD	Normal
GTEX-W5WG-0926-SM-4RTX9	Normal
GTEX-X8HC-2726-SM-46MUA	Normal
GTEX-ZYWO-1926-SM-5E456	Normal
GTEX-11I78-1926-SM-59878	Normal
GTEX-U3ZN-1026-SM-4DXTC	Normal
GTEX-PWCY-1326-SM-48TCU	Normal
GTEX-TSE9-2226-SM-4DXUR	Normal
GTEX-TML8-0926-SM-4DXSJ	Normal
GTEX-13OVJ-2426-SM-5KM3I	Normal
GTEX-133LE-1226-SM-5IFGC	Normal
GTEX-13PVR-1226-SM-5RQJ2	Normal
GTEX-1117F-2226-SM-5N9CH	Normal
GTEX-OHPL-2426-SM-48TDN	Normal
GTEX-S341-0726-SM-4AD5R	Normal
GTEX-PWOO-1726-SM-48TDC	Normal
GTEX-QCQG-1426-SM-48U22	Normal
GTEX-S32W-1226-SM-4AD67	Normal
GTEX-14AS3-1326-SM-5RQJE	Normal
GTEX-RU1J-0826-SM-46MUU	Normal
GTEX-XUZC-1026-SM-4BOPY	Normal
GTEX-ZV6S-1426-SM-59HKX	Normal
GTEX-13OVI-0726-SM-5L3DD	Normal

## Sheet: TableS2_Microarray_GSE33874
Samples	Affymetrix Human Genome U133 Plus 2.0 Array
GSM838230	Hoechst33342 dye sorted main population-1
GSM838231	Hoechst33342 dye sorted side population-1
GSM838232	Hoechst33342 dye sorted main population-2
GSM838233	Hoechst33342 dye sorted side population-2
GSM838234	Hoechst33342 dye sorted main population-3
GSM838235	Hoechst33342 dye sorted side population-3
GSM838236	Hoechst33342 dye sorted main population-4
GSM838237	Hoechst33342 dye sorted side population-4
GSM838238	Hoechst33342 dye sorted main population-5
GSM838239	Hoechst33342 dye sorted side population-5
GSM838240	Hoechst33342 dye sorted main population-6
GSM838241	Hoechst33342 dye sorted side population-6
GSM838242	Hoechst33342 dye sorted main population-7
GSM838243	Hoechst33342 dye sorted side population-7
GSM838244	Hoechst33342 dye sorted main population-8
GSM838245	Hoechst33342 dye sorted side population-8
GSM838246	Hoechst33342 dye sorted main population-9
GSM838247	Hoechst33342 dye sorted side population-9
GSM838248	Hoechst33342 dye sorted main population-10
GSM838249	Hoechst33342 dye sorted side population-10

## Sheet: TableS3_TCGA_DiffExp_genes
ID	baseMean	log2FoldChange	lfcSE	stat	pvalue	padj	gene symbol
ENSG00000000005.5	21.9784	-2.06171	0.280202	-7.35794	1.87e-13	1.3e-11	TNMD
ENSG00000000971.15	5672.76	-1.34423	0.205854	-6.53	6.58e-11	3e-09	CFH
ENSG00000002587.9	1113.87	-1.14983	0.199901	-5.75197	8.82e-09	2.54e-07	HS3ST1
ENSG00000003989.16	5545.49	-1.1407	0.254679	-4.47897	7.5e-06	0.000104767	SLC7A2
ENSG00000004776.11	5724.67	-1.95041	0.21252	-9.1775	4.41e-20	9.01e-18	HSPB6
ENSG00000004799.7	4589.34	-2.34555	0.237581	-9.87263	5.47e-23	1.53e-20	PDK4
ENSG00000004809.13	21.3133	-1.05721	0.258462	-4.0904	4.31e-05	0.000470053	SLC22A16
ENSG00000004848.6	1095.97	-2.77871	0.430022	-6.46178	1.03e-10	4.53e-09	ARX
ENSG00000005187.11	3782.79	-1.79326	0.211833	-8.46547	2.55e-17	3.51e-15	ACSM3
ENSG00000005981.12	11.3963	-1.88628	0.277302	-6.80229	1.03e-11	5.4e-10	ASB4
ENSG00000006071.11	17.7875	-2.03415	0.338147	-6.01559	1.79e-09	6.04e-08	ABCC8
ENSG00000006128.11	8.34832	-1.57876	0.364918	-4.32634	1.52e-05	0.000191468	TAC1
ENSG00000006283.17	352.945	-1.35212	0.23123	-5.8475	4.99e-09	1.52e-07	CACNA1G
ENSG00000006606.8	48.6555	-2.76644	0.273821	-10.1031	5.35e-24	1.76e-21	CCL26
ENSG00000008118.9	349.055	-1.32443	0.231985	-5.70913	1.14e-08	3.2e-07	CAMK1G
ENSG00000008311.14	1140.96	-3.02627	0.268768	-11.2598	2.07e-29	1.39e-26	AASS
ENSG00000010295.19	642.272	-1.36822	0.188226	-7.269	3.62e-13	2.45e-11	IFFO1
ENSG00000011465.16	35820.7	-1.12736	0.219277	-5.14128	2.73e-07	5.61e-06	DCN
ENSG00000012124.14	3200.53	-1.88088	0.248592	-7.56613	3.84e-14	3.04e-12	CD22
ENSG00000012504.13	127.843	-3.83208	0.465472	-8.23267	1.83e-16	2.18e-14	NR1H4
ENSG00000012817.15	1.60063	-3.34503	0.669812	-4.99398	5.91e-07	1.1e-05	KDM5D
ENSG00000013293.5	11.9274	-2.34057	0.344463	-6.79485	1.08e-11	5.67e-10	SLC7A14
ENSG00000013297.10	1937.82	-1.20194	0.221763	-5.41995	5.96e-08	1.44e-06	CLDN11
ENSG00000013441.15	4712.59	-1.09304	0.157133	-6.95612	3.5e-12	2.01e-10	CLK1
ENSG00000014914.19	1164.05	-1.21643	0.168449	-7.22134	5.15e-13	3.38e-11	MTMR11
ENSG00000015592.16	6.66987	-1.01749	0.285755	-3.5607	0.000369863	0.00285956	STMN4
ENSG00000016490.15	1.17007	-2.16457	0.563405	-3.84194	0.000122065	0.00112686	CLCA1
ENSG00000018625.14	564.741	-1.8261	0.289108	-6.31634	2.68e-10	1.07e-08	ATP1A2
ENSG00000036448.9	52.8849	-1.15537	0.204113	-5.66046	1.51e-08	4.17e-07	MYOM2
ENSG00000039537.13	171.156	-3.16419	0.30888	-10.2441	1.26e-24	4.52e-22	C6
ENSG00000040731.10	4.84948	-1.61324	0.384011	-4.20102	2.66e-05	0.000312757	CDH10
ENSG00000042062.11	372.591	-1.88905	0.218931	-8.62853	6.21e-18	9.34e-16	FAM65C
ENSG00000047634.14	1066.2	-1.26172	0.186117	-6.77916	1.21e-11	6.29e-10	SCML1
ENSG00000047648.21	526.868	-1.57392	0.224823	-7.00069	2.55e-12	1.49e-10	ARHGAP6
ENSG00000054803.3	55.1024	-1.4206	0.252526	-5.62557	1.85e-08	5.01e-07	CBLN4
ENSG00000056487.15	103.517	-1.27654	0.338774	-3.7681	0.000164492	0.00144837	PHF21B
ENSG00000060982.14	12093	1.06794	0.23602	4.52478	6.05e-06	8.68e-05	BCAT1
ENSG00000063127.15	135.224	-1.00935	0.1965	-5.13665	2.8e-07	5.74e-06	SLC6A16
ENSG00000064205.10	1292.41	-3.88069	0.292841	-13.2519	4.4e-40	1.5e-36	WISP2
ENSG00000064692.18	582.844	-1.22481	0.224303	-5.46049	4.75e-08	1.17e-06	SNCAIP
ENSG00000065325.12	16.1753	-1.89138	0.290388	-6.51328	7.35e-11	3.32e-09	GLP2R
ENSG00000066230.10	26.5598	-1.3431	0.240074	-5.59452	2.21e-08	5.87e-07	SLC9A3
ENSG00000066405.12	12.8565	-2.2518	0.278525	-8.08474	6.23e-16	6.94e-14	CLDN18
ENSG00000066813.14	0.932877	-2.09744	0.511353	-4.10175	4.1e-05	0.00045107	ACSM2B
ENSG00000067048.16	1.59637	-3.14223	0.67995	-4.62127	3.81e-06	5.81e-05	DDX3Y
ENSG00000067798.13	497.676	-1.68832	0.226677	-7.44812	9.47e-14	6.92e-12	NAV3
ENSG00000068831.18	219.695	-1.0471	0.188276	-5.56156	2.67e-08	6.98e-07	RASGRP2
ENSG00000068985.4	6.64021	-2.79706	0.796879	-3.51002	0.000448076	0.00334376	PAGE1
ENSG00000069431.10	584.016	-1.26354	0.193717	-6.52258	6.91e-11	3.13e-09	ABCC9
ENSG00000069535.13	2414.69	-1.37375	0.215983	-6.36044	2.01e-10	8.36e-09	MAOB
ENSG00000069702.10	3875.31	-1.51248	0.193669	-7.8096	5.74e-15	5.19e-13	TGFBR3
ENSG00000070193.4	89.9642	-3.72598	0.412028	-9.04303	1.52e-19	2.9e-17	FGF10
ENSG00000070388.11	34.096	-3.05194	0.294597	-10.3597	3.78e-25	1.45e-22	FGF22
ENSG00000070404.9	1495.46	-1.06524	0.171236	-6.22091	4.94e-10	1.88e-08	FSTL3
ENSG00000070748.17	5.4705	1.13271	0.374435	3.02512	0.00248534	0.0132403	CHAT
ENSG00000070808.15	17.181	-1.23808	0.235081	-5.2666	1.39e-07	3.05e-06	CAMK2A
ENSG00000071205.11	852.109	-1.53096	0.182327	-8.39679	4.59e-17	6.09e-15	ARHGAP10
ENSG00000071991.8	53.7127	-3.02102	0.479835	-6.29597	3.05e-10	1.21e-08	CDH19
ENSG00000073146.15	63.7293	-1.24801	0.223884	-5.57436	2.48e-08	6.54e-07	MOV10L1
ENSG00000075826.16	614.592	-1.29717	0.19988	-6.48974	8.6e-11	3.82e-09	SEC31B
ENSG00000077009.13	4.40265	-2.77195	0.41056	-6.75164	1.46e-11	7.48e-10	NMRK2
ENSG00000077157.20	2574.38	-1.11879	0.176246	-6.34793	2.18e-10	8.96e-09	PPP1R12B
ENSG00000077522.12	59.8056	-1.45636	0.244983	-5.94475	2.77e-09	8.94e-08	ACTN2
ENSG00000077616.10	240.834	-2.01834	0.221267	-9.12174	7.39e-20	1.46e-17	NAALAD2
ENSG00000077943.7	255.203	-1.21318	0.205629	-5.89984	3.64e-09	1.14e-07	ITGA8
ENSG00000078295.15	176.69	-1.36691	0.296837	-4.60492	4.13e-06	6.22e-05	ADCY2
ENSG00000078596.10	1243.73	-2.16927	0.219939	-9.86308	6.02e-23	1.67e-20	ITM2A
ENSG00000079689.13	2.47296	-3.51348	0.568773	-6.17729	6.52e-10	2.42e-08	SCGN
ENSG00000080293.9	9.99592	-1.21449	0.298218	-4.07248	4.65e-05	0.000501321	SCTR
ENSG00000080546.13	1360.59	-1.03291	0.148441	-6.95837	3.44e-12	1.98e-10	SESN1
ENSG00000080947.14	314.918	-1.01027	0.178119	-5.67189	1.41e-08	3.91e-07	CROCCP3
ENSG00000083067.22	98.9567	-3.0196	0.26793	-11.2701	1.84e-29	1.28e-26	TRPM3
ENSG00000083622.8	0.846377	-1.71117	0.668253	-2.56066	0.0104473	0.0412564	AC000111.6
ENSG00000084636.17	6589.25	-2.00024	0.232503	-8.60307	7.76e-18	1.14e-15	COL16A1
ENSG00000084734.8	127.068	-3.64082	0.308714	-11.7935	4.22e-32	4.23e-29	GCKR
ENSG00000087495.16	137.057	-1.57913	0.246114	-6.41625	1.4e-10	6.01e-09	PHACTR3
ENSG00000089199.9	281.227	-3.05004	0.298368	-10.2224	1.57e-24	5.53e-22	CHGB
ENSG00000089847.12	87.2299	-1.05038	0.181468	-5.78821	7.11e-09	2.1e-07	ANKRD24
ENSG00000090534.17	34.6878	-1.38674	0.235885	-5.87888	4.13e-09	1.28e-07	THPO
ENSG00000090539.15	724.527	-1.5073	0.240894	-6.2571	3.92e-10	1.51e-08	CHRD
ENSG00000090975.12	1422.81	-1.24722	0.179906	-6.93264	4.13e-12	2.33e-10	PITPNM2
ENSG00000091138.12	3.36971	-1.09133	0.382542	-2.85284	0.00433302	0.0205969	SLC26A3
ENSG00000091704.9	71.5305	-2.01278	0.26567	-7.57625	3.56e-14	2.85e-12	CPA1
ENSG00000092054.12	38.8059	-2.97837	0.395071	-7.53884	4.74e-14	3.68e-12	MYH7
ENSG00000092445.11	2434.13	-1.23216	0.187663	-6.56579	5.18e-11	2.4e-09	TYRO3
ENSG00000092529.22	312.172	-1.39607	0.194267	-7.18634	6.66e-13	4.31e-11	CAPN3
ENSG00000095627.9	10.7901	-1.64238	0.287075	-5.72108	1.06e-08	3e-07	TDRD1
ENSG00000095739.10	883.897	-1.51111	0.24451	-6.18016	6.4e-10	2.38e-08	BAMBI
ENSG00000096060.14	4431.69	-1.01256	0.181244	-5.58673	2.31e-08	6.12e-07	FKBP5
ENSG00000096088.16	24.448	-3.52022	0.406069	-8.66902	4.36e-18	6.76e-16	PGC
ENSG00000099622.13	9881.31	-1.31445	0.161174	-8.15547	3.48e-16	4.05e-14	CIRBP
ENSG00000099715.14	1.68025	-1.51026	0.50799	-2.97302	0.00294887	0.0151672	PCDH11Y
ENSG00000099840.13	276.836	-2.37527	0.225588	-10.5293	6.33e-26	2.7e-23	IZUMO4
ENSG00000099860.8	2433.78	-1.04526	0.170524	-6.12967	8.81e-10	3.15e-08	GADD45B
ENSG00000099937.10	21.9522	-2.22597	0.265656	-8.37913	5.33e-17	7.02e-15	SERPIND1
ENSG00000100024.14	8.96034	-1.502	0.232241	-6.46741	9.97e-11	4.38e-09	UPB1
ENSG00000100146.16	17.1664	-4.74556	0.625754	-7.58374	3.36e-14	2.71e-12	SOX10
ENSG00000100307.12	2145.54	-1.19111	0.177021	-6.72865	1.71e-11	8.59e-10	CBX7
ENSG00000100321.14	1845.77	-1.16567	0.190787	-6.1098	9.98e-10	3.54e-08	SYNGR1
ENSG00000100362.12	69.9213	-1.06001	0.272135	-3.89517	9.81e-05	0.000940508	PVALB
ENSG00000100650.15	11114.6	-1.01337	0.137517	-7.36908	1.72e-13	1.21e-11	SRSF5
ENSG00000100867.14	295.91	-1.56449	0.259676	-6.02477	1.69e-09	5.73e-08	DHRS2
ENSG00000100968.13	4873.52	-1.50841	0.177991	-8.47463	2.36e-17	3.26e-15	NFATC4
ENSG00000101251.11	7.51119	-1.60397	0.28517	-5.62462	1.86e-08	5.03e-07	SEL1L2
ENSG00000101280.7	120.434	-3.52548	0.298641	-11.8051	3.68e-32	3.8e-29	ANGPT4
ENSG00000101425.12	43.7426	-1.01386	0.308424	-3.28721	0.00101184	0.00646831	BPI
ENSG00000101440.9	115.776	-3.98799	0.315526	-12.6392	1.28e-36	2.58e-33	ASIP
ENSG00000101470.9	47.0594	-1.58109	0.19927	-7.93442	2.11e-15	2.13e-13	TNNC2
ENSG00000101883.4	31.6224	-2.33709	0.266455	-8.77104	1.77e-18	2.9e-16	RHOXF1
ENSG00000101951.16	7.94461	-2.32733	0.423059	-5.5012	3.77e-08	9.49e-07	PAGE4
ENSG00000101977.19	73.1939	-3.33447	0.320168	-10.4147	2.12e-25	8.43e-23	MCF2
ENSG00000102010.14	22.4675	-1.30389	0.214348	-6.08305	1.18e-09	4.1e-08	BMX
ENSG00000102239.4	18.3881	-3.71856	0.365256	-10.1807	2.42e-24	8.33e-22	BRS3
ENSG00000102271.13	172.294	-1.03046	0.2161	-4.76844	1.86e-06	3.06e-05	KLHL4
ENSG00000102290.21	76.8178	-2.15477	0.407455	-5.28836	1.23e-07	2.74e-06	PCDH11X
ENSG00000102362.15	2145.8	-2.81974	0.247472	-11.3942	4.47e-30	3.32e-27	SYTL4
ENSG00000102794.9	3.06254	1.01419	0.270627	3.74757	0.000178558	0.00155417	IRG1
ENSG00000102878.15	929.067	-1.36368	0.191705	-7.11344	1.13e-12	7.03e-11	HSF4
ENSG00000103196.11	3437.45	-1.08772	0.21992	-4.94597	7.58e-07	1.38e-05	CRISPLD2
ENSG00000103355.12	641.417	1.22885	0.382979	3.20865	0.00133359	0.00805277	PRSS33
ENSG00000103472.9	104.795	-1.64386	0.194957	-8.43193	3.4e-17	4.58e-15	RRN3P2
ENSG00000103742.11	592.735	-1.01808	0.205064	-4.96468	6.88e-07	1.26e-05	IGDCC4
ENSG00000104435.13	12.5221	-1.08324	0.315336	-3.43521	0.0005921	0.00420161	STMN2
ENSG00000104722.13	31.902	-2.92547	0.35658	-8.20423	2.32e-16	2.74e-14	NEFM
ENSG00000104760.16	3.67139	-2.25695	0.404541	-5.57906	2.42e-08	6.38e-07	FGL1
ENSG00000104804.7	7.4894	-1.16876	0.236077	-4.95075	7.39e-07	1.35e-05	TULP2
ENSG00000104852.14	11671.3	-1.06622	0.143756	-7.4169	1.2e-13	8.63e-12	SNRNP70
ENSG00000104879.4	50.3425	-1.98906	0.232481	-8.55581	1.17e-17	1.69e-15	CKM
ENSG00000104938.16	67.5223	-2.15813	0.341396	-6.32149	2.59e-10	1.04e-08	CLEC4M
ENSG00000105141.5	15.1512	1.30001	0.417749	3.11195	0.00185859	0.0105034	CASP14
ENSG00000105398.3	1.60626	-2.66879	0.745423	-3.58023	0.000343289	0.0026907	SULT2A1
ENSG00000105509.10	268.041	-4.25367	0.337738	-12.5946	2.26e-36	4.29e-33	HAS1
ENSG00000105605.7	1.459	-1.95793	0.476165	-4.11188	3.92e-05	0.000436345	CACNG7
ENSG00000105641.3	77.064	1.03687	0.316804	3.27289	0.00106453	0.00673443	SLC5A5
ENSG00000105695.14	624.032	-1.61406	0.235246	-6.86119	6.83e-12	3.72e-10	MAG
ENSG00000105852.10	256.458	-1.55285	0.303253	-5.12064	3.04e-07	6.16e-06	PON3
ENSG00000106018.13	311.787	-2.33289	0.265473	-8.78769	1.53e-18	2.53e-16	VIPR2
ENSG00000106034.17	1017.25	-1.66085	0.229236	-7.24515	4.32e-13	2.9e-11	CPED1
ENSG00000106278.11	34.6555	-1.00219	0.287944	-3.48052	0.000500441	0.00365224	PTPRZ1
ENSG00000106410.14	2.45735	-3.0393	0.703821	-4.31828	1.57e-05	0.000197639	NOBOX
ENSG00000106511.5	62.5363	-1.08902	0.280189	-3.88673	0.000101603	0.000967282	MEOX2
ENSG00000106809.10	1173.78	-1.91028	0.267617	-7.13809	9.46e-13	5.98e-11	OGN
ENSG00000106823.12	902.095	-1.22533	0.220551	-5.55577	2.76e-08	7.19e-07	ECM2
ENSG00000107518.16	353.356	-1.53639	0.276523	-5.55611	2.76e-08	7.18e-07	ATRNL1
ENSG00000107611.14	254.083	-1.19207	0.20912	-5.70041	1.2e-08	3.35e-07	CUBN
ENSG00000107736.19	2296.34	-1.73068	0.222715	-7.77085	7.8e-15	6.91e-13	CDH23
ENSG00000108255.7	0.576623	-1.12316	0.433559	-2.59055	0.00958226	0.0385631	CRYBA1
ENSG00000108381.10	82.0824	-2.71373	0.286863	-9.46002	3.08e-21	7.14e-19	ASPA
ENSG00000108551.4	826.167	-1.6194	0.220559	-7.34228	2.1e-13	1.46e-11	RASD1
ENSG00000108759.3	1.65556	-1.05291	0.383379	-2.7464	0.00602533	0.0267687	KRT32
ENSG00000108797.11	822.239	-1.28941	0.181138	-7.11838	1.09e-12	6.81e-11	CNTNAP1
ENSG00000108823.15	39.1111	-2.39117	0.254123	-9.4095	4.98e-21	1.13e-18	SGCA
ENSG00000108924.13	966.657	-3.23922	0.290908	-11.1349	8.49e-29	4.82e-26	HLF
ENSG00000109046.14	6065.68	-1.05723	0.170013	-6.21853	5.02e-10	1.9e-08	WSB1
ENSG00000109061.9	9.08395	-3.74442	0.530653	-7.05625	1.71e-12	1.03e-10	MYH1
ENSG00000109158.10	0.875373	-1.90553	0.52835	-3.60656	0.000310278	0.00247114	GABRA4
ENSG00000109193.10	17.9688	-1.10646	0.335626	-3.29669	0.000978302	0.00628808	SULT1E1
ENSG00000109205.16	3.90084	-1.13522	0.406425	-2.79317	0.00521938	0.0238864	ODAM
ENSG00000109339.18	349.211	-1.10785	0.2057	-5.38574	7.21e-08	1.7e-06	MAPK10
ENSG00000109771.15	264.498	-1.09891	0.17203	-6.38788	1.68e-10	7.07e-09	LRP2BP
ENSG00000109906.13	515.395	-2.09491	0.279516	-7.49478	6.64e-14	5.01e-12	ZBTB16
ENSG00000109956.12	167.966	1.19627	0.251233	4.7616	1.92e-06	3.16e-05	B3GAT1
ENSG00000110244.6	0.927639	-2.16934	0.609976	-3.55643	0.000375926	0.00289752	APOA4
ENSG00000110245.11	2.33313	-1.87498	0.464987	-4.03234	5.52e-05	0.000579444	APOC3
ENSG00000110318.13	396.059	-1.22988	0.190477	-6.45687	1.07e-10	4.67e-09	CEP126
ENSG00000111245.14	14.2974	-2.86174	0.436035	-6.56311	5.27e-11	2.43e-09	MYL2
ENSG00000111339.10	12.6388	-1.02705	0.254097	-4.04196	5.3e-05	0.000559608	ART4
ENSG00000111404.6	85.8254	-3.63244	0.36265	-10.0164	1.29e-23	4.08e-21	RERGL
ENSG00000111452.12	570.699	-2.26523	0.252688	-8.96454	3.12e-19	5.74e-17	ADGRD1
ENSG00000111664.10	218.367	-1.79638	0.222596	-8.07016	7.02e-16	7.73e-14	GNB3
ENSG00000111879.18	156.379	-1.30447	0.202961	-6.42721	1.3e-10	5.62e-09	FAM184A
ENSG00000112139.14	483.021	-1.18584	0.189861	-6.24581	4.22e-10	1.62e-08	MDGA1
ENSG00000112214.10	77.0972	-2.87401	0.286876	-10.0183	1.27e-23	4.04e-21	FHL5
ENSG00000112273.6	0.823303	-1.13238	0.411488	-2.75191	0.00592493	0.0264224	HDGFL1
ENSG00000112494.9	46.0799	1.1135	0.315163	3.53308	0.000410741	0.0031142	UNC93A
ENSG00000112936.18	22819.1	-2.90839	0.328509	-8.8533	8.5e-19	1.48e-16	C7
ENSG00000113319.11	740.103	-1.27275	0.208314	-6.10976	9.98e-10	3.54e-08	RASGRF2
ENSG00000113600.10	0.777411	-1.51645	0.389652	-3.8918	9.95e-05	0.00095153	C9
ENSG00000113971.18	1523.32	-1.33859	0.171268	-7.81573	5.46e-15	4.97e-13	NPHP3
ENSG00000114115.9	10297.4	-1.06915	0.158596	-6.74135	1.57e-11	7.98e-10	RBP1
ENSG00000114204.14	63.6475	-1.0142	0.281678	-3.60058	0.000317507	0.00251813	SERPINI2
ENSG00000114248.9	5.0909	1.61536	0.396138	4.07776	4.55e-05	0.000491634	LRRC31
ENSG00000114374.12	0.825932	-1.89901	0.665936	-2.85164	0.00434945	0.0206607	USP9Y
ENSG00000114857.17	4393.94	-1.02758	0.16178	-6.3517	2.13e-10	8.77e-09	NKTR
ENSG00000114923.16	4277.05	-2.16512	0.222087	-9.74897	1.86e-22	4.93e-20	SLC4A3
ENSG00000115138.10	73.096	-1.25276	0.190055	-6.59155	4.35e-11	2.05e-09	POMC
ENSG00000115226.9	701.803	-1.18127	0.183676	-6.43129	1.27e-10	5.48e-09	FNDC4
ENSG00000115290.9	174.512	-1.07576	0.211276	-5.0917	3.55e-07	7.07e-06	GRB14
ENSG00000115361.7	243.962	-4.46056	0.337938	-13.1993	8.85e-40	2.52e-36	ACADL
ENSG00000115386.5	154.568	-2.41383	0.316413	-7.62874	2.37e-14	1.96e-12	REG1A
ENSG00000115461.4	63095.5	-1.76069	0.223917	-7.86314	3.75e-15	3.52e-13	IGFBP5
ENSG00000115592.11	4.50596	1.35947	0.273224	4.97565	6.5e-07	1.2e-05	PRKAG3
ENSG00000115593.14	2.61254	-2.06332	0.441957	-4.66861	3.03e-06	4.72e-05	SMYD1
ENSG00000115641.18	6930.04	-1.29094	0.171735	-7.51706	5.6e-14	4.27e-12	FHL2
ENSG00000115665.8	4.68329	-1.49894	0.44562	-3.36372	0.000768994	0.00520253	SLC5A7
ENSG00000116176.6	11.8958	-3.37673	0.394314	-8.56355	1.09e-17	1.59e-15	TPSG1
ENSG00000116194.12	865.149	-1.05794	0.27337	-3.87	0.000108834	0.00102469	ANGPTL1
ENSG00000116254.17	33.9602	-1.47955	0.234419	-6.31155	2.76e-10	1.1e-08	CHD5
ENSG00000116299.16	1875.89	1.0208	0.289161	3.53021	0.000415237	0.0031427	KIAA1324
ENSG00000116690.11	153.793	-1.40425	0.251367	-5.58645	2.32e-08	6.12e-07	PRG4
ENSG00000116741.7	1569.69	-1.46194	0.20243	-7.22198	5.12e-13	3.38e-11	RGS2
ENSG00000116761.11	397.243	-1.1038	0.185979	-5.93511	2.94e-09	9.4e-08	CTH
ENSG00000116883.8	332.848	-1.19103	0.169605	-7.02238	2.18e-12	1.29e-10	RP11-268J15.5
ENSG00000116996.9	0.94584	-2.55127	0.871052	-2.92896	0.00340102	0.0170431	ZP4
ENSG00000117020.16	1730.86	-1.20457	0.206792	-5.82506	5.71e-09	1.71e-07	AKT3
ENSG00000117215.14	77.3112	1.21679	0.295593	4.11643	3.85e-05	0.000429249	PLA2G2D
ENSG00000117425.13	768.211	-1.93471	0.235139	-8.22797	1.9e-16	2.26e-14	PTCH2
ENSG00000117525.13	2335.04	-2.23684	0.231391	-9.6669	4.17e-22	1.08e-19	F3
ENSG00000117594.9	460.614	-2.08644	0.244214	-8.54347	1.3e-17	1.87e-15	HSD11B1
ENSG00000117707.15	254.678	-2.01218	0.270101	-7.44973	9.35e-14	6.86e-12	PROX1
ENSG00000117834.12	18.5017	-1.30314	0.225701	-5.77373	7.75e-09	2.26e-07	SLC5A9
ENSG00000117983.17	2578.39	1.16529	0.303862	3.83494	0.000125595	0.00115477	MUC5B
ENSG00000118231.4	53.8024	-2.38604	0.475295	-5.02013	5.16e-07	9.77e-06	CRYGD
ENSG00000118245.2	1.24805	-2.53539	0.503339	-5.03713	4.73e-07	9.03e-06	TNP1
ENSG00000118271.9	1.64314	-2.13309	0.489029	-4.3619	1.29e-05	0.00016679	TTR
ENSG00000118307.18	205.844	1.02761	0.178306	5.76316	8.26e-09	2.39e-07	CASC1
ENSG00000118432.12	151.325	-1.3341	0.25846	-5.16173	2.45e-07	5.06e-06	CNR1
ENSG00000118495.18	1431.8	-1.04096	0.191975	-5.42237	5.88e-08	1.42e-06	PLAGL1
ENSG00000118515.11	6807.61	-1.33008	0.179519	-7.40914	1.27e-13	9.07e-12	SGK1
ENSG00000118520.13	6.19821	-1.45079	0.229064	-6.33359	2.4e-10	9.68e-09	ARG1
ENSG00000118526.6	1165.34	-1.10359	0.272871	-4.04439	5.25e-05	0.00055505	TCF21
ENSG00000118729.11	86.3767	-1.73466	0.228561	-7.5895	3.21e-14	2.6e-12	CASQ2
ENSG00000119125.16	179.937	1.54441	0.294694	5.24072	1.6e-07	3.46e-06	GDA
ENSG00000119138.4	2753.77	-1.59729	0.183936	-8.68395	3.82e-18	6.04e-16	KLF9
ENSG00000119508.17	1198.59	-3.14616	0.272647	-11.5393	8.36e-31	6.96e-28	NR4A3
ENSG00000119698.11	139.926	-1.90566	0.252244	-7.55483	4.19e-14	3.29e-12	PPP4R4
ENSG00000119865.8	636.999	-1.00057	0.188852	-5.29816	1.17e-07	2.61e-06	CNRIP1
ENSG00000119973.4	1.95226	-2.22745	0.506324	-4.39927	1.09e-05	0.000143604	PRLHR
ENSG00000119986.6	1116.9	-1.28967	0.159996	-8.06059	7.59e-16	8.25e-14	AVPI1
ENSG00000120049.18	197.003	-1.25943	0.179262	-7.02565	2.13e-12	1.26e-10	KCNIP2
ENSG00000120129.5	13636.3	-1.00769	0.175884	-5.72929	1.01e-08	2.88e-07	DUSP1
ENSG00000120210.6	5.64811	-4.04118	0.727965	-5.55134	2.83e-08	7.34e-07	INSL6
ENSG00000120658.12	181.984	-1.01882	0.196919	-5.1738	2.29e-07	4.78e-06	ENOX1
ENSG00000120907.17	11.6224	-3.03874	0.373904	-8.12706	4.4e-16	5.03e-14	ADRA1A
ENSG00000120937.8	3.7309	-1.48223	0.329065	-4.50436	6.66e-06	9.43e-05	NPPB
ENSG00000121297.6	1322.9	-1.61728	0.211992	-7.62897	2.37e-14	1.96e-12	TSHZ3
ENSG00000121310.16	5485.98	-1.57543	0.1812	-8.69442	3.49e-18	5.53e-16	ECHDC2
ENSG00000121440.14	1805.81	-1.12818	0.182092	-6.19566	5.8e-10	2.17e-08	PDZRN3
ENSG00000121807.5	75.2112	1.10953	0.210432	5.27262	1.34e-07	2.96e-06	CCR2
ENSG00000121871.3	15.5653	-1.04136	0.319091	-3.2635	0.00110043	0.00691414	SLITRK3
ENSG00000122121.10	61.3716	-2.27381	0.27494	-8.27021	1.34e-16	1.65e-14	XPNPEP2
ENSG00000122188.12	41.4742	1.03871	0.22585	4.59913	4.24e-06	6.35e-05	LAX1
ENSG00000122194.18	10.0558	-1.6317	0.254779	-6.40439	1.51e-10	6.44e-09	PLG
ENSG00000122304.10	3.55422	-3.26723	0.618569	-5.28191	1.28e-07	2.83e-06	PRM2
ENSG00000122367.19	175.019	-1.72333	0.213714	-8.06374	7.4e-16	8.06e-14	LDB3
ENSG00000122420.9	88.2649	-1.27766	0.298454	-4.28093	1.86e-05	0.000228442	PTGFR
ENSG00000122548.5	4.98865	1.1844	0.263425	4.49615	6.92e-06	9.75e-05	KIAA0087
ENSG00000122574.10	1708.2	-1.85847	0.22474	-8.26942	1.35e-16	1.66e-14	WIPF3
ENSG00000122824.10	237.177	-1.40363	0.230573	-6.08759	1.15e-09	4e-08	NUDT10
ENSG00000122852.14	2.97767	-3.1862	0.519146	-6.13738	8.39e-10	3.02e-08	SFTPA1
ENSG00000123119.11	208.133	-1.19497	0.179181	-6.66907	2.57e-11	1.25e-09	NECAB1
ENSG00000123358.19	25314	-3.15641	0.25973	-12.1526	5.55e-34	7.29e-31	NR4A1
ENSG00000123360.11	580.054	-1.01819	0.183856	-5.53795	3.06e-08	7.87e-07	PDE1B
ENSG00000123496.7	35.7672	-1.20258	0.258813	-4.64651	3.38e-06	5.2e-05	IL13RA2
ENSG00000123560.13	105.956	-2.28579	0.319774	-7.14814	8.8e-13	5.58e-11	PLP1
ENSG00000123561.14	1.03189	-2.68715	0.649609	-4.13656	3.53e-05	0.000398865	SERPINA7
ENSG00000123570.3	171.906	-1.61118	0.216893	-7.42845	1.1e-13	7.96e-12	RAB9B
ENSG00000123572.16	1280.08	-2.8543	0.28572	-9.98984	1.69e-23	5.19e-21	NRK
ENSG00000123612.15	156.051	-1.26235	0.229886	-5.49121	3.99e-08	1e-06	ACVR1C
ENSG00000123843.12	535.965	-5.57337	0.387427	-14.3856	6.37e-47	7.25e-43	C4BPB
ENSG00000123999.4	939.742	-2.56492	0.266081	-9.63962	5.44e-22	1.38e-19	INHA
ENSG00000124003.12	1.34134	1.31457	0.304586	4.31593	1.59e-05	0.000199464	MOGAT1
ENSG00000124194.15	29.3696	-1.44504	0.234475	-6.16289	7.14e-10	2.61e-08	GDAP1L1
ENSG00000124260.11	25.3486	-1.28984	0.508174	-2.53818	0.0111429	0.0433171	MAGEA10
ENSG00000124406.16	1030.6	-1.43077	0.192056	-7.44976	9.35e-14	6.86e-12	ATP8A1
ENSG00000124449.6	2.13318	1.04336	0.24229	4.30626	1.66e-05	0.000207313	IRGC
ENSG00000124564.17	5.68617	-2.17449	0.435485	-4.99326	5.94e-07	1.11e-05	SLC17A3
ENSG00000124568.10	1.63043	-2.98021	0.621993	-4.79139	1.66e-06	2.77e-05	SLC17A1
ENSG00000124749.16	99.9957	-1.24793	0.235221	-5.30533	1.12e-07	2.52e-06	COL21A1
ENSG00000124762.13	4327.79	-1.04827	0.169879	-6.1707	6.8e-10	2.51e-08	CDKN1A
ENSG00000125285.5	12.1816	-1.03726	0.370111	-2.80257	0.00506972	0.0233567	SOX21
ENSG00000125414.18	8.7818	-3.14619	0.457697	-6.87395	6.24e-12	3.43e-10	MYH2
ENSG00000125430.8	229.754	-1.01975	0.180924	-5.63635	1.74e-08	4.73e-07	HS3ST3B1
ENSG00000125675.17	78.9831	-2.04422	0.266432	-7.67259	1.69e-14	1.44e-12	GRIA3
ENSG00000125740.13	6043.83	-1.29217	0.254248	-5.08233	3.73e-07	7.36e-06	FOSB
ENSG00000126218.11	335.116	-1.59391	0.236746	-6.73258	1.67e-11	8.41e-10	F10
ENSG00000126266.3	42.6708	-1.96816	0.313682	-6.27438	3.51e-10	1.37e-08	FFAR1
ENSG00000126368.5	2209.59	-1.17421	0.179284	-6.54948	5.77e-11	2.65e-09	NR1D1
ENSG00000126562.16	196.681	-1.66437	0.262518	-6.34005	2.3e-10	9.35e-09	WNK4
ENSG00000126752.7	18.4519	-1.40791	0.486265	-2.89536	0.00378727	0.0185162	SSX1
ENSG00000126890.13	21.9725	-3.23507	0.745161	-4.34143	1.42e-05	0.000180172	CTAG2
ENSG00000127241.16	96.3929	-1.17794	0.238681	-4.9352	8.01e-07	1.45e-05	MASP1
ENSG00000127472.10	689.658	-3.73169	0.313007	-11.922	9.08e-33	9.68e-30	PLA2G5
ENSG00000127528.5	2351.93	-1.51821	0.201941	-7.51809	5.56e-14	4.24e-12	KLF2
ENSG00000127920.5	1553.54	-1.15838	0.180236	-6.42706	1.3e-10	5.62e-09	GNG11
ENSG00000128045.6	940.582	-2.02693	0.238802	-8.48789	2.1e-17	2.93e-15	RASL11B
ENSG00000128262.8	69.4757	-1.51493	0.229084	-6.61298	3.77e-11	1.78e-09	POM121L9P
ENSG00000128285.4	57.8878	-1.31398	0.250696	-5.24132	1.59e-07	3.45e-06	MCHR1
ENSG00000128482.15	60.3306	-1.4761	0.216133	-6.82958	8.52e-12	4.53e-10	RNF112
ENSG00000128573.22	196.958	-2.59058	0.300595	-8.61818	6.8e-18	1e-15	FOXP2
ENSG00000128606.12	784.911	-1.23495	0.232709	-5.30685	1.12e-07	2.51e-06	LRRC17
ENSG00000128610.11	1.31871	-1.38201	0.441127	-3.13291	0.00173085	0.00992789	FEZF1
ENSG00000128713.12	20.2097	-1.45279	0.316724	-4.58692	4.5e-06	6.69e-05	HOXD11
ENSG00000128918.14	1049.93	-1.12016	0.251129	-4.46049	8.18e-06	0.000112792	ALDH1A2
ENSG00000129204.16	189.98	-1.42618	0.207483	-6.87369	6.26e-12	3.43e-10	USP6
ENSG00000129596.4	201.421	-1.08056	0.241604	-4.47244	7.73e-06	0.000107493	CDO1
ENSG00000129824.15	2.79243	-4.02904	0.724123	-5.56403	2.64e-08	6.9e-07	RPS4Y1
ENSG00000130037.4	67.1504	-1.27495	0.23899	-5.33474	9.57e-08	2.18e-06	KCNA5
ENSG00000130176.7	1132.24	-1.18388	0.211408	-5.59999	2.14e-08	5.72e-07	CNN1
ENSG00000130222.10	628.631	-1.35478	0.173943	-7.78861	6.78e-15	6.03e-13	GADD45G
ENSG00000130224.14	343.529	-1.14931	0.184774	-6.22005	4.97e-10	1.89e-08	LRCH2
ENSG00000130528.11	79.8975	-1.50819	0.240794	-6.26338	3.77e-10	1.46e-08	HRC
ENSG00000130653.15	1113.68	-2.32654	0.231202	-10.0628	8.07e-24	2.62e-21	PNPLA7
ENSG00000130656.4	2.61193	-1.36281	0.326309	-4.17645	2.96e-05	0.000342606	HBZ
ENSG00000130844.16	2602.37	-1.86804	0.203873	-9.16277	5.06e-20	1.02e-17	ZNF331
ENSG00000130988.12	375.451	-1.19825	0.194274	-6.16785	6.92e-10	2.54e-08	RGN
ENSG00000131002.11	0.865331	-1.99206	0.645923	-3.08406	0.00204199	0.0113204	TXLNGY
ENSG00000131016.16	6363.31	-1.27443	0.20346	-6.2638	3.76e-10	1.46e-08	AKAP12
ENSG00000131018.22	4355.26	-2.52741	0.240154	-10.5241	6.69e-26	2.82e-23	SYNE1
ENSG00000131080.14	194.613	-1.2264	0.195331	-6.27859	3.42e-10	1.34e-08	EDA2R
ENSG00000131095.11	81.8034	-1.14855	0.241474	-4.75639	1.97e-06	3.23e-05	GFAP
ENSG00000131096.10	37.2744	-2.44142	0.324387	-7.52627	5.22e-14	3.99e-12	PYY
ENSG00000131386.17	678.678	-2.96845	0.271114	-10.9491	6.71e-28	3.52e-25	GALNT15
ENSG00000131459.12	972.265	-1.0909	0.19984	-5.45886	4.79e-08	1.18e-06	GFPT2
ENSG00000131910.4	3.64168	-1.39435	0.328293	-4.24727	2.16e-05	0.000261303	NR0B2
ENSG00000132424.14	6961.25	-1.00922	0.15184	-6.6466	3e-11	1.44e-09	PNISR
ENSG00000132554.19	249.707	-1.45785	0.234875	-6.20692	5.4e-10	2.03e-08	RGS22
ENSG00000132677.12	239.06	-4.5643	0.368327	-12.392	2.89e-35	4.28e-32	RHBG
ENSG00000132693.12	6.01772	-2.9061	0.493791	-5.88528	3.97e-09	1.23e-07	CRP
ENSG00000132703.3	1.17224	-2.04657	0.605366	-3.38071	0.000722983	0.00495154	APCS
ENSG00000132872.11	14.3266	-1.77144	0.384862	-4.6028	4.17e-06	6.27e-05	SYT4
ENSG00000132938.18	94.9044	-1.00293	0.224949	-4.45849	8.25e-06	0.000113712	MTUS2
ENSG00000132972.18	3.04951	-3.24517	0.632195	-5.13318	2.85e-07	5.83e-06	RNF17
ENSG00000133063.15	135.813	1.08334	0.271852	3.98504	6.75e-05	0.000688239	CHIT1
ENSG00000133083.14	419.263	-1.41092	0.203241	-6.94214	3.86e-12	2.19e-10	DCLK1
ENSG00000133105.7	1.09554	-2.28952	0.823689	-2.77959	0.00544274	0.0246491	RXFP2
ENSG00000133107.14	58.4722	-1.89389	0.248061	-7.63479	2.26e-14	1.88e-12	TRPC4
ENSG00000133124.11	40.9549	-2.68856	0.356146	-7.54905	4.38e-14	3.42e-12	IRS4
ENSG00000133142.17	7198.5	-1.35735	0.161502	-8.40456	4.29e-17	5.75e-15	TCEAL4
ENSG00000133392.16	6622.3	-3.04688	0.293726	-10.3732	3.28e-25	1.29e-22	MYH11
ENSG00000133519.12	1051.94	-1.66657	0.246131	-6.77106	1.28e-11	6.62e-10	ZDHHC8P1
ENSG00000133878.8	204.768	-3.69254	0.307187	-12.0205	2.77e-33	3.38e-30	DUSP26
ENSG00000133980.4	2.5239	-1.15678	0.430318	-2.6882	0.00718383	0.0306424	VRTN
ENSG00000134007.3	5.04317	-1.11093	0.200748	-5.53395	3.13e-08	8.01e-07	ADAM20
ENSG00000134201.10	1618.86	-4.52653	0.317635	-14.2507	4.44e-46	3.78e-42	GSTM5
ENSG00000134207.14	33.4696	-1.22676	0.229189	-5.35264	8.67e-08	1.99e-06	SYT6
ENSG00000134259.3	146.619	-1.71167	0.223707	-7.65139	1.99e-14	1.67e-12	NGF
ENSG00000134571.10	6.57368	-1.02021	0.226391	-4.50642	6.59e-06	9.35e-05	MYBPC3
ENSG00000134812.7	0.79027	-1.30443	0.522056	-2.49863	0.0124674	0.047237	GIF
ENSG00000134853.11	6192.11	-1.98238	0.254343	-7.79411	6.49e-15	5.82e-13	PDGFRA
ENSG00000135063.17	770.124	-2.07797	0.227114	-9.14947	5.72e-20	1.15e-17	FAM189A2
ENSG00000135111.14	1603.56	-1.44642	0.233766	-6.18746	6.11e-10	2.27e-08	TBX3
ENSG00000135298.13	35.0589	-1.16531	0.306223	-3.80543	0.000141558	0.00127743	ADGRB3
ENSG00000135346.8	3.14175	-2.27132	0.444003	-5.11554	3.13e-07	6.31e-06	CGA
ENSG00000135409.10	328.698	-2.55943	0.343237	-7.45674	8.87e-14	6.53e-12	AMHR2
ENSG00000135447.16	294.939	-1.05038	0.207009	-5.07407	3.89e-07	7.66e-06	PPP1R1A
ENSG00000135502.16	181.617	-1.00906	0.231667	-4.35564	1.33e-05	0.000170719	SLC26A10
ENSG00000135905.18	819.545	-1.04796	0.185525	-5.64863	1.62e-08	4.43e-07	DOCK10
ENSG00000135976.16	599.461	-1.00648	0.165332	-6.08761	1.15e-09	4e-08	ANKRD36
ENSG00000136011.14	22.5575	-1.31996	0.285018	-4.63117	3.64e-06	5.57e-05	STAB2
ENSG00000136111.12	1756.88	-1.29338	0.182733	-7.07797	1.46e-12	8.89e-11	TBC1D4
ENSG00000136297.14	0.941785	-1.34992	0.535273	-2.52193	0.0116713	0.0449244	MMD2
ENSG00000136352.17	5.52372	-3.18602	0.725004	-4.39449	1.11e-05	0.000146627	NKX2-1
ENSG00000136449.13	110.098	-1.03549	0.208408	-4.96857	6.74e-07	1.24e-05	MYCBPAP
ENSG00000136546.13	1435.59	-3.76809	0.351475	-10.7208	8.13e-27	3.85e-24	SCN7A
ENSG00000136574.17	1649.69	-1.87921	0.346795	-5.41879	6e-08	1.45e-06	GATA4
ENSG00000136695.14	8.5799	-1.20122	0.329956	-3.64055	0.000272055	0.00221217	IL36RN
ENSG00000136826.14	1464.54	-1.20376	0.189329	-6.35804	2.04e-10	8.46e-09	KLF4
ENSG00000136872.17	8.98033	-1.21305	0.211932	-5.72377	1.04e-08	2.96e-07	ALDOB
ENSG00000136931.9	898.883	-1.70339	0.33491	-5.08609	3.66e-07	7.25e-06	NR5A1
ENSG00000137265.14	131.09	1.11478	0.227764	4.89444	9.86e-07	1.75e-05	IRF4
ENSG00000137392.9	15.3271	-1.96311	0.341063	-5.75586	8.62e-09	2.49e-07	CLPS
ENSG00000137463.4	173.985	-1.08712	0.217144	-5.00645	5.54e-07	1.04e-05	MGARP
ENSG00000137558.7	345.276	-2.20165	0.260948	-8.43715	3.25e-17	4.44e-15	PI15
ENSG00000137726.15	4832.45	-1.37281	0.18958	-7.24132	4.44e-13	2.96e-11	FXYD6
ENSG00000137731.13	77.7201	-1.80118	0.20861	-8.6342	5.91e-18	8.93e-16	FXYD2
ENSG00000137766.16	22.0252	-2.44773	0.34077	-7.18295	6.82e-13	4.41e-11	UNC13C
ENSG00000137869.13	51.039	-1.9965	0.253053	-7.88964	3.03e-15	2.94e-13	CYP19A1
ENSG00000137948.18	3.06474	-1.42729	0.363101	-3.93083	8.47e-05	0.000834088	BRDT
ENSG00000138039.14	42.6641	-2.90391	0.332326	-8.73811	2.37e-18	3.81e-16	LHCGR
ENSG00000138356.13	1321.49	-2.28117	0.260136	-8.76915	1.8e-18	2.94e-16	AOX1
ENSG00000138395.14	138.843	-1.91645	0.256685	-7.46613	8.26e-14	6.11e-12	CDK15
ENSG00000138653.9	6.32834	-1.31872	0.434376	-3.0359	0.00239823	0.0128646	NDST4
ENSG00000138678.10	328.024	-1.82279	0.222165	-8.20467	2.31e-16	2.74e-14	AGPAT9
ENSG00000138685.12	397.211	-2.29425	0.223418	-10.2689	9.73e-25	3.53e-22	FGF2
ENSG00000138722.9	206.329	-1.34412	0.241478	-5.5662	2.6e-08	6.82e-07	MMRN1
ENSG00000138738.10	344.895	-1.57963	0.195457	-8.08175	6.38e-16	7.09e-14	PRDM5
ENSG00000138755.5	1440.67	1.07892	0.278982	3.86735	0.000110026	0.00103391	CXCL9
ENSG00000138823.12	55.5961	-1.39665	0.23794	-5.86976	4.36e-09	1.34e-07	MTTP
ENSG00000139112.10	2860.31	-1.10605	0.165335	-6.68974	2.24e-11	1.09e-09	GABARAPL1
ENSG00000139144.9	3.22518	-1.88376	0.370469	-5.08481	3.68e-07	7.28e-06	PIK3C2G
ENSG00000139220.16	26.4032	-1.37107	0.261589	-5.24132	1.59e-07	3.45e-06	PPFIA2
ENSG00000139269.2	31.5568	1.14063	0.235931	4.8346	1.33e-06	2.28e-05	INHBE
ENSG00000139874.5	30.6809	-1.00542	0.228915	-4.39209	1.12e-05	0.00014803	SSTR1
ENSG00000140009.18	163.514	-1.27099	0.225284	-5.64172	1.68e-08	4.6e-07	ESR2
ENSG00000140015.19	5.5407	-1.17104	0.450229	-2.60098	0.0092957	0.0376631	KCNH5
ENSG00000140090.17	23.4896	-1.00957	0.202666	-4.98143	6.31e-07	1.17e-05	SLC24A4
ENSG00000140093.9	18.6322	-3.932	0.447235	-8.7918	1.47e-18	2.45e-16	SERPINA10
ENSG00000140285.9	639.065	-1.71401	0.25179	-6.80731	9.94e-12	5.24e-10	FGF7
ENSG00000140459.17	604.55	-1.44795	0.246981	-5.8626	4.56e-09	1.4e-07	CYP11A1
ENSG00000140488.14	377.142	-1.42373	0.217525	-6.54512	5.94e-11	2.72e-09	CELF6
ENSG00000140538.16	313.472	-1.34139	0.286318	-4.68496	2.8e-06	4.4e-05	NTRK3
ENSG00000140955.10	12.4492	-1.14655	0.197222	-5.81347	6.12e-09	1.83e-07	ADAD2
ENSG00000141052.17	259.547	-1.61967	0.300987	-5.38119	7.4e-08	1.74e-06	MYOCD
ENSG00000141086.17	36.9701	-1.08674	0.170467	-6.3751	1.83e-10	7.63e-09	CTRL
ENSG00000141338.13	1874.51	-3.55124	0.31563	-11.2513	2.28e-29	1.47e-26	ABCA8
ENSG00000141431.9	198.195	-1.36575	0.268006	-5.09597	3.47e-07	6.93e-06	ASXL3
ENSG00000141449.14	220.2	-1.7771	0.245609	-7.2355	4.64e-13	3.08e-11	GREB1L
ENSG00000141504.11	1963.09	-1.05257	0.144668	-7.27575	3.45e-13	2.34e-11	SAT2
ENSG00000141753.6	25200.1	-1.24499	0.191459	-6.50262	7.89e-11	3.54e-09	IGFBP4
ENSG00000142178.7	918.895	-1.64242	0.241052	-6.81356	9.52e-12	5.04e-10	SIK1
ENSG00000142494.13	206.192	-1.07329	0.200796	-5.34517	9.03e-08	2.06e-06	SLC47A1
ENSG00000142515.14	6.27426	-1.4308	0.322655	-4.43447	9.23e-06	0.000125237	KLK3
ENSG00000142615.7	8.70207	-2.83637	0.44832	-6.32667	2.51e-10	1.01e-08	CELA2A
ENSG00000142623.9	17.1364	1.26497	0.323814	3.90647	9.37e-05	0.000905503	PADI1
ENSG00000142698.14	5.25321	1.85784	0.345007	5.38492	7.25e-08	1.7e-06	C1orf94
ENSG00000142789.19	20.4879	-4.84504	0.612774	-7.90674	2.64e-15	2.59e-13	CELA3A
ENSG00000143006.7	4.20764	-1.11191	0.447149	-2.48666	0.012895	0.0484321	DMRTB1
ENSG00000143028.8	88.9122	-1.46048	0.225606	-6.47359	9.57e-11	4.22e-09	SYPL2
ENSG00000143125.5	1432.14	-5.12864	0.387539	-13.2339	5.59e-40	1.73e-36	PROK1
ENSG00000143127.12	181.958	-1.11586	0.19511	-5.71914	1.07e-08	3.04e-07	ITGA10
ENSG00000143196.4	268.321	-1.05784	0.28142	-3.75892	0.000170649	0.00149679	DPT
ENSG00000143355.15	152.319	-1.83508	0.262695	-6.98559	2.84e-12	1.64e-10	LHX9
ENSG00000143520.6	8.74247	-1.57681	0.385215	-4.09332	4.25e-05	0.000464766	FLG2
ENSG00000143536.7	29.3801	-2.21588	0.405558	-5.46378	4.66e-08	1.15e-06	CRNN
ENSG00000143595.12	1.76669	-1.09326	0.322305	-3.392	0.000693854	0.00478702	AQP10
ENSG00000143632.14	62.5858	-2.33914	0.28882	-8.09894	5.54e-16	6.24e-14	ACTA1
ENSG00000143768.11	505.717	-2.85465	0.311118	-9.17546	4.5e-20	9.13e-18	LEFTY2
ENSG00000143839.13	225.395	-2.71192	0.3017	-8.98879	2.5e-19	4.63e-17	REN
ENSG00000144015.4	22.9621	1.0174	0.324504	3.13525	0.00171709	0.00986222	TRIM43
ENSG00000144227.4	17.7745	-1.02082	0.343168	-2.9747	0.00293277	0.0150973	NXPH2
ENSG00000144229.11	87.8342	1.20849	0.215738	5.60163	2.12e-08	5.68e-07	THSD7B
ENSG00000144230.16	67.1272	-1.05276	0.237044	-4.44119	8.95e-06	0.000122069	GPR17
ENSG00000144331.18	190.342	-2.91441	0.281329	-10.3594	3.79e-25	1.45e-22	ZNF385B
ENSG00000144460.11	4.3519	1.06731	0.294816	3.62025	0.000294317	0.00236334	NYAP2
ENSG00000144596.11	331.223	-2.43765	0.254645	-9.57272	1.04e-21	2.57e-19	GRIP2
ENSG00000144642.20	735.996	-1.17343	0.187264	-6.2662	3.7e-10	1.44e-08	RBMS3
ENSG00000144891.17	78.4695	-1.27844	0.235955	-5.41817	6.02e-08	1.45e-06	AGTR1
ENSG00000144908.13	1012.74	-2.75394	0.276897	-9.94575	2.63e-23	7.74e-21	ALDH1L1
ENSG00000144935.14	535.54	-1.37905	0.18139	-7.60265	2.9e-14	2.38e-12	TRPC1
ENSG00000145020.14	1025.87	-1.13872	0.194477	-5.85531	4.76e-09	1.46e-07	AMT
ENSG00000145075.11	222.533	-1.8927	0.233169	-8.11729	4.77e-16	5.4e-14	CCDC39
ENSG00000145087.12	255.04	-3.81111	0.319081	-11.944	6.98e-33	8.21e-30	STXBP5L
ENSG00000145113.21	1334.69	1.03797	0.261158	3.97447	7.05e-05	0.000713739	MUC4
ENSG00000145242.13	33.6778	-2.45264	0.329524	-7.44297	9.84e-14	7.16e-12	EPHA5
ENSG00000145321.12	1.44507	-1.50817	0.558603	-2.6999	0.00693597	0.0298502	GC
ENSG00000145708.10	21.0641	-1.28681	0.196387	-6.55244	5.66e-11	2.6e-09	CRHBP
ENSG00000145757.15	13.0404	-1.21281	0.199506	-6.07908	1.21e-09	4.19e-08	SPATA9
ENSG00000145808.8	50.1488	-1.20992	0.327047	-3.69954	0.000215993	0.0018266	ADAMTS19
ENSG00000145879.10	1.10724	-1.27507	0.401627	-3.17475	0.00149964	0.00885789	SPINK7
ENSG00000146054.17	62.6893	-1.00586	0.170088	-5.91379	3.34e-09	1.05e-07	TRIM7
ENSG00000146067.15	2614.6	-1.00055	0.143961	-6.95013	3.65e-12	2.08e-10	FAM193B
ENSG00000146250.6	107.493	-1.1789	0.23895	-4.93369	8.07e-07	1.46e-05	PRSS35
ENSG00000146352.12	1.2546	-1.23157	0.489919	-2.51383	0.0119429	0.045717	CLVS2
ENSG00000146469.12	8.0528	-1.94934	0.284457	-6.85286	7.24e-12	3.91e-10	VIP
ENSG00000146477.5	459.969	-3.48284	0.310005	-11.2348	2.75e-29	1.71e-26	SLC22A3
ENSG00000146678.9	126.343	-3.40551	0.320434	-10.6278	2.21e-26	9.93e-24	IGFBP1
ENSG00000146966.12	589.671	-1.28834	0.208612	-6.17577	6.58e-10	2.44e-08	DENND2A
ENSG00000147081.14	1.00126	-1.06756	0.390064	-2.73688	0.00620244	0.0273419	AKAP4
ENSG00000147119.3	567.358	-2.20515	0.227147	-9.70805	2.79e-22	7.25e-20	CHST7
ENSG00000147206.16	67.1821	-1.00135	0.244875	-4.08923	4.33e-05	0.000471517	NXF3
ENSG00000147223.5	4.5578	-1.39277	0.300669	-4.63225	3.62e-06	5.54e-05	RIPPLY1
ENSG00000147231.13	155.984	-3.10117	0.287735	-10.7778	4.38e-27	2.17e-24	CXorf57
ENSG00000147234.10	135.657	-2.18431	0.247493	-8.82575	1.09e-18	1.85e-16	FRMPD3
ENSG00000147408.14	624.458	-1.59789	0.197801	-8.07827	6.57e-16	7.28e-14	CSGALNACT1
ENSG00000147437.9	93.6412	-1.75739	0.203126	-8.65171	5.07e-18	7.69e-16	GNRH1
ENSG00000147465.11	9937.93	-5.06933	0.398391	-12.7245	4.32e-37	9.83e-34	STAR
ENSG00000147576.15	649.533	-1.82276	0.202035	-9.02201	1.85e-19	3.48e-17	ADHFE1
ENSG00000147588.6	4.13427	-1.94417	0.381934	-5.09032	3.57e-07	7.09e-06	PMP2
ENSG00000147614.3	18.0916	1.15727	0.230546	5.01967	5.18e-07	9.78e-06	ATP6V0D2
ENSG00000147655.10	7.20005	-1.39468	0.328565	-4.24477	2.19e-05	0.000263843	RSPO2
ENSG00000147852.15	2811.79	-1.41805	0.188364	-7.52823	5.14e-14	3.95e-12	VLDLR
ENSG00000147894.14	1216.24	-1.01566	0.150147	-6.76443	1.34e-11	6.92e-10	C9orf72
ENSG00000148156.7	0.915585	-1.4578	0.340391	-4.28272	1.85e-05	0.000226948	ACTL7B
ENSG00000148541.12	322.323	-1.30739	0.202832	-6.44569	1.15e-10	5.01e-09	FAM13C
ENSG00000148702.14	17.2455	1.03613	0.291208	3.55806	0.000373606	0.00288327	HABP2
ENSG00000148935.10	52.6951	-1.14235	0.210651	-5.42292	5.86e-08	1.42e-06	GAS2
ENSG00000149124.10	0.795094	-1.29505	0.462278	-2.80145	0.00508742	0.0234181	GLYAT
ENSG00000149451.17	1860.48	-2.30117	0.260041	-8.84926	8.81e-19	1.53e-16	ADAM33
ENSG00000149633.11	274.228	-1.70794	0.245975	-6.94353	3.82e-12	2.18e-10	KIAA1755
ENSG00000149927.17	330.442	-1.51545	0.224361	-6.75454	1.43e-11	7.35e-10	DOC2A
ENSG00000150672.16	164.827	-1.25984	0.220494	-5.7137	1.11e-08	3.12e-07	DLG2
ENSG00000151006.7	183.12	-1.37558	0.186445	-7.37797	1.61e-13	1.14e-11	PRSS53
ENSG00000151303.11	43.961	-1.60993	0.22597	-7.12453	1.04e-12	6.54e-11	RP11-96C23.13
ENSG00000151572.16	112.488	-2.47637	0.285472	-8.67463	4.15e-18	6.52e-16	ANO4
ENSG00000151632.16	189.125	-1.29517	0.215174	-6.01918	1.75e-09	5.93e-08	AKR1C2
ENSG00000151834.15	14.9016	-1.56419	0.398238	-3.92778	8.57e-05	0.000842767	GABRA2
ENSG00000151892.14	508.85	-1.32892	0.261684	-5.07836	3.81e-07	7.5e-06	GFRA1
ENSG00000151914.17	4443.07	-1.35218	0.195279	-6.92434	4.38e-12	2.46e-10	DST
ENSG00000151962.7	3.99717	-1.16007	0.363206	-3.19396	0.00140336	0.00839383	RBM46
ENSG00000152254.10	0.785396	-1.66855	0.435974	-3.82717	0.000129624	0.00118543	G6PC2
ENSG00000152527.13	1438.4	-1.75082	0.230667	-7.59022	3.19e-14	2.59e-12	PLEKHH2
ENSG00000152580.8	2248.05	-2.19425	0.249349	-8.79991	1.37e-18	2.3e-16	IGSF10
ENSG00000152591.12	4.80066	1.04787	0.233124	4.4949	6.96e-06	9.8e-05	DSPP
ENSG00000152779.13	66.3243	-1.66948	0.299876	-5.56722	2.59e-08	6.79e-07	SLC16A12
ENSG00000152784.15	138.12	-1.54573	0.218741	-7.06649	1.59e-12	9.59e-11	PRDM8
ENSG00000152932.7	29.7121	-2.10936	0.308195	-6.84425	7.69e-12	4.11e-10	RAB3C
ENSG00000153234.13	3354.79	-2.1756	0.227808	-9.55016	1.29e-21	3.16e-19	NR4A2
ENSG00000153253.15	41.0799	-1.51098	0.259181	-5.82982	5.55e-09	1.67e-07	SCN3A
ENSG00000153291.15	968.614	-1.9632	0.217368	-9.0317	1.69e-19	3.2e-17	SLC25A27
ENSG00000153707.15	819.89	-1.54287	0.25335	-6.08987	1.13e-09	3.96e-08	PTPRD
ENSG00000153820.12	35.0225	-4.09654	0.538678	-7.60479	2.85e-14	2.35e-12	SPHKAP
ENSG00000153823.18	458.036	-1.34218	0.233477	-5.74866	9e-09	2.59e-07	PID1
ENSG00000153902.13	291.713	-2.18613	0.232938	-9.38503	6.29e-21	1.4e-18	LGI4
ENSG00000154065.16	273.075	-1.74829	0.220259	-7.93743	2.06e-15	2.08e-13	ANKRD29
ENSG00000154134.14	1629.39	-1.76491	0.206982	-8.52684	1.5e-17	2.14e-15	ROBO3
ENSG00000154175.16	1432.57	-1.27205	0.217778	-5.84105	5.19e-09	1.58e-07	ABI3BP
ENSG00000154258.16	1050.31	-3.56488	0.304739	-11.6982	1.3e-31	1.2e-28	ABCA9
ENSG00000154262.12	906.878	-3.37057	0.299274	-11.2625	2.01e-29	1.37e-26	ABCA6
ENSG00000154263.17	924.843	-4.74434	0.335359	-14.147	1.95e-45	1.33e-41	ABCA10
ENSG00000154265.15	660.702	-1.00646	0.16869	-5.96633	2.43e-09	7.98e-08	ABCA5
ENSG00000154485.4	10.9795	-1.43845	0.272301	-5.28256	1.27e-07	2.82e-06	MMP21
ENSG00000154678.16	145.934	-1.80964	0.255439	-7.08444	1.4e-12	8.53e-11	PDE1C
ENSG00000154721.14	646.33	-1.1092	0.17646	-6.28584	3.26e-10	1.29e-08	JAM2
ENSG00000154734.14	18015.6	-1.7967	0.2254	-7.97114	1.57e-15	1.63e-13	ADAMTS1
ENSG00000154736.5	864.068	-1.46615	0.209466	-6.99948	2.57e-12	1.5e-10	ADAMTS5
ENSG00000154874.14	121.831	-2.04689	0.253109	-8.08699	6.12e-16	6.84e-14	CCDC144B
ENSG00000154975.13	28.4238	-2.30443	0.447	-5.15533	2.53e-07	5.22e-06	CA10
ENSG00000154997.8	4.21647	-2.79417	0.573843	-4.86923	1.12e-06	1.95e-05	44088
ENSG00000155269.11	324.108	-3.21757	0.304649	-10.5616	4.49e-26	1.94e-23	GPR78
ENSG00000155511.17	8.05027	-1.26893	0.306518	-4.13983	3.48e-05	0.000393753	GRIA1
ENSG00000155816.19	78.1814	-1.05056	0.246501	-4.26188	2.03e-05	0.00024617	FMN2
ENSG00000155970.11	274.114	-1.21768	0.178954	-6.80444	1.01e-11	5.33e-10	MICU3
ENSG00000156011.16	1351.27	-1.05212	0.188792	-5.57289	2.51e-08	6.59e-07	PSD3
ENSG00000156049.6	119.383	-1.20969	0.198338	-6.09916	1.07e-09	3.75e-08	GNA14
ENSG00000156395.12	41.9864	-2.11556	0.434409	-4.86997	1.12e-06	1.95e-05	SORCS3
ENSG00000156486.7	34.5906	-1.20022	0.224	-5.35811	8.41e-08	1.94e-06	KCNS2
ENSG00000156564.8	12.3497	-1.61332	0.337347	-4.78236	1.73e-06	2.88e-05	LRFN2
ENSG00000156920.10	7.12309	-4.53952	0.565291	-8.03042	9.71e-16	1.04e-13	ADGRG4
ENSG00000157103.10	88.2632	-1.36756	0.208566	-6.55698	5.49e-11	2.53e-09	SLC6A1
ENSG00000157110.15	4232.43	-1.29697	0.171305	-7.5711	3.7e-14	2.94e-12	RBPMS
ENSG00000157119.11	1.80241	-1.04099	0.354986	-2.93248	0.00336269	0.0168982	KLHL40
ENSG00000157150.4	117.04	-1.03293	0.216942	-4.76132	1.92e-06	3.16e-05	TIMP4
ENSG00000157404.15	628.046	-2.06245	0.256416	-8.04338	8.74e-16	9.43e-14	KIT
ENSG00000157502.12	2692.3	-3.96443	0.319073	-12.4248	1.92e-35	2.97e-32	MUM1L1
ENSG00000157514.16	6086.61	-1.15755	0.17168	-6.7425	1.56e-11	7.93e-10	TSC22D3
ENSG00000157851.16	104.763	-1.1665	0.342373	-3.4071	0.000656581	0.00457822	DPYSL5
ENSG00000158258.15	4270.65	-2.33185	0.260356	-8.9564	3.35e-19	6.09e-17	CLSTN2
ENSG00000158301.18	724.212	-1.49952	0.186986	-8.01944	1.06e-15	1.13e-13	GPRASP2
ENSG00000158477.6	68.8178	1.14071	0.363434	3.13871	0.00169693	0.00977107	CD1A
ENSG00000158485.10	8.09749	1.05559	0.329919	3.19953	0.00137652	0.00826224	CD1B
ENSG00000158488.15	43.9351	1.23794	0.296187	4.1796	2.92e-05	0.000338477	CD1E
ENSG00000158516.11	17.7927	-1.18127	0.216501	-5.45617	4.87e-08	1.2e-06	CPA2
ENSG00000158560.14	159.463	-1.01937	0.187442	-5.43831	5.38e-08	1.31e-06	DYNC1I1
ENSG00000158578.18	13.4928	-1.15295	0.237156	-4.86157	1.16e-06	2.02e-05	ALAS2
ENSG00000158639.11	2.96901	-1.81333	0.590824	-3.06916	0.00214661	0.0117665	PAGE5
ENSG00000158764.6	17.9002	-2.86877	0.342517	-8.37555	5.5e-17	7.21e-15	ITLN2
ENSG00000158786.4	5.38466	-1.19772	0.287648	-4.16386	3.13e-05	0.000359508	PLA2G2F
ENSG00000158815.10	144.055	-1.05435	0.280973	-3.75248	0.000175091	0.00152868	FGF17
ENSG00000158859.9	2290.76	-2.48956	0.253458	-9.82239	9.02e-23	2.46e-20	ADAMTS4
ENSG00000159251.6	63.0294	-2.1416	0.27678	-7.73753	1.01e-14	8.87e-13	ACTC1
ENSG00000159307.18	1325.03	-2.97488	0.31562	-9.42553	4.28e-21	9.73e-19	SCUBE1
ENSG00000159388.5	9005.09	-1.02012	0.150345	-6.78522	1.16e-11	6.06e-10	BTG2
ENSG00000159433.11	1234.7	-2.18143	0.230551	-9.46183	3.03e-21	7.07e-19	STARD9
ENSG00000159527.3	2.50712	1.00919	0.34874	2.89382	0.00380588	0.0185891	PGLYRP3
ENSG00000159648.11	72.8528	-1.09054	0.180178	-6.05255	1.43e-09	4.89e-08	TEPP
ENSG00000159763.3	9.52766	-1.08126	0.383415	-2.82007	0.00480133	0.0223679	PIP
ENSG00000160349.9	31.4043	-1.00787	0.356471	-2.82735	0.00469355	0.0219679	LCN1
ENSG00000160539.4	151.142	-1.07453	0.206341	-5.20755	1.91e-07	4.06e-06	PPAPDC3
ENSG00000160801.13	263.036	-1.92903	0.241408	-7.99075	1.34e-15	1.41e-13	PTH1R
ENSG00000160808.9	39.0477	-1.20762	0.223484	-5.40364	6.53e-08	1.55e-06	MYL3
ENSG00000160882.11	5.88912	-4.79284	0.756903	-6.33217	2.42e-10	9.76e-09	CYP11B1
ENSG00000161180.10	18.591	-1.55918	0.208359	-7.48311	7.26e-14	5.42e-12	CCDC116
ENSG00000161281.10	229.45	-1.21168	0.183456	-6.60477	3.98e-11	1.87e-09	COX7A1
ENSG00000161381.13	1133.15	-1.13057	0.18444	-6.12976	8.8e-10	3.15e-08	PLXDC1
ENSG00000161551.12	761.919	-1.21901	0.165166	-7.38052	1.58e-13	1.12e-11	ZNF577
ENSG00000161634.11	2.02781	-3.55105	0.695788	-5.10364	3.33e-07	6.68e-06	DCD
ENSG00000161640.15	1058.44	-3.51867	0.306198	-11.4915	1.46e-30	1.15e-27	SIGLEC11
ENSG00000161643.12	479.386	-3.49509	0.292819	-11.936	7.68e-33	8.74e-30	SIGLEC16
ENSG00000161649.12	37.4119	-2.11345	0.268194	-7.8803	3.27e-15	3.12e-13	CD300LG
ENSG00000161912.17	167.947	-1.40526	0.220036	-6.38649	1.7e-10	7.12e-09	ADCY10P1
ENSG00000162367.11	56.2973	-1.14594	0.18342	-6.24763	4.17e-10	1.6e-08	TAL1
ENSG00000162383.11	101.748	-3.16641	0.29397	-10.7712	4.71e-27	2.26e-24	SLC1A7
ENSG00000162438.11	8.04935	-1.22832	0.274484	-4.47501	7.64e-06	0.000106466	CTRC
ENSG00000162552.14	541.34	-1.28132	0.206036	-6.21889	5.01e-10	1.9e-08	WNT4
ENSG00000162595.4	564.44	-1.53924	0.227018	-6.78024	1.2e-11	6.26e-10	DIRAS3
ENSG00000162624.14	1.2825	-2.37088	0.866184	-2.73715	0.00619733	0.0273229	LHX8
ENSG00000162630.5	84.713	-1.87964	0.230957	-8.13848	4e-16	4.61e-14	B3GALT2
ENSG00000162669.15	116.379	-1.24185	0.240052	-5.17326	2.3e-07	4.79e-06	HFM1
ENSG00000162687.16	338.134	-1.82919	0.239567	-7.63538	2.25e-14	1.87e-12	KCNT2
ENSG00000162771.7	1.979	-1.70578	0.635955	-2.68223	0.00731334	0.0310821	FAM71A
ENSG00000162873.14	5321.6	-2.57922	0.27631	-9.33453	1.01e-20	2.2e-18	KLHDC8A
ENSG00000162881.6	121.012	-1.72799	0.205666	-8.40194	4.39e-17	5.85e-15	OXER1
ENSG00000162882.14	229.345	-1.03521	0.157518	-6.57202	4.96e-11	2.31e-09	HAAO
ENSG00000162896.5	1044.46	1.3722	0.326275	4.20566	2.6e-05	0.000307535	PIGR
ENSG00000163092.19	5.4945	-2.2241	0.399471	-5.56763	2.58e-08	6.78e-07	XIRP2
ENSG00000163132.6	1004.16	1.1268	0.233587	4.82391	1.41e-06	2.4e-05	MSX1
ENSG00000163207.6	8.19588	-2.21814	0.500673	-4.43032	9.41e-06	0.000127161	IVL
ENSG00000163209.14	20.921	-3.38734	0.572094	-5.92095	3.2e-09	1.02e-07	SPRR3
ENSG00000163218.14	18.9984	1.27171	0.297425	4.27572	1.91e-05	0.000232517	PGLYRP4
ENSG00000163239.12	152.065	-3.02417	0.265038	-11.4103	3.71e-30	2.81e-27	TDRD10
ENSG00000163254.4	10.6739	-1.08146	0.415828	-2.60075	0.00930204	0.0376709	CRYGC
ENSG00000163285.7	44.5929	-1.93351	0.338815	-5.70668	1.15e-08	3.24e-07	GABRG1
ENSG00000163297.16	1734.42	-1.17041	0.19877	-5.88828	3.9e-09	1.21e-07	ANTXR2
ENSG00000163395.16	78.909	-2.84541	0.310035	-9.17772	4.4e-20	9.01e-18	IGFN1
ENSG00000163431.12	1935.22	-1.86362	0.23347	-7.98224	1.44e-15	1.5e-13	LMOD1
ENSG00000163492.13	16.5868	-1.25292	0.215552	-5.81258	6.15e-09	1.84e-07	CCDC141
ENSG00000163497.2	3.54926	-1.26643	0.288907	-4.38353	1.17e-05	0.000152791	FEV
ENSG00000163644.14	1411.8	-1.12668	0.167564	-6.72386	1.77e-11	8.83e-10	PPM1K
ENSG00000163728.10	2201.73	-1.11275	0.16646	-6.68479	2.31e-11	1.13e-09	TTC14
ENSG00000163792.6	545.165	-1.98292	0.240325	-8.251	1.57e-16	1.9e-14	TCF23
ENSG00000163793.12	2.80486	-1.3919	0.437247	-3.18332	0.00145599	0.00863743	DNAJC5G
ENSG00000163815.5	185.936	-1.435	0.181707	-7.89735	2.85e-15	2.78e-13	CLEC3B
ENSG00000163827.12	207.361	-1.35589	0.235578	-5.75557	8.64e-09	2.49e-07	LRRC2
ENSG00000163833.7	4.67783	-1.94242	0.344987	-5.63041	1.8e-08	4.88e-07	FBXO40
ENSG00000163884.3	943.353	-1.60453	0.204309	-7.85342	4.05e-15	3.77e-13	KLF15
ENSG00000164106.7	22.4946	-1.27491	0.269643	-4.72812	2.27e-06	3.64e-05	SCRG1
ENSG00000164107.8	630.15	-2.53128	0.273188	-9.26572	1.94e-20	4.11e-18	HAND2
ENSG00000164129.11	3.19503	-1.08525	0.423554	-2.56226	0.0103993	0.0411266	NPY5R
ENSG00000164169.12	639.71	-1.10014	0.16333	-6.73571	1.63e-11	8.24e-10	PRMT9
ENSG00000164256.9	3.88373	-1.4584	0.415437	-3.51052	0.000447231	0.00333818	PRDM9
ENSG00000164266.10	19.1019	-1.5108	0.294093	-5.13715	2.79e-07	5.72e-06	SPINK1
ENSG00000164292.12	2598.22	-1.49111	0.203837	-7.31519	2.57e-13	1.77e-11	RHOBTB3
ENSG00000164303.10	149.762	-1.11317	0.283318	-3.92905	8.53e-05	0.000838834	ENPP6
ENSG00000164309.14	2059.96	-2.81297	0.276411	-10.1767	2.52e-24	8.59e-22	CMYA5
ENSG00000164440.14	241.897	-1.5591	0.214164	-7.27994	3.34e-13	2.27e-11	TXLNB
ENSG00000164530.13	40.9456	-2.05154	0.291098	-7.04757	1.82e-12	1.09e-10	PI16
ENSG00000164619.8	97.3096	-1.75559	0.230933	-7.60218	2.91e-14	2.38e-12	BMPER
ENSG00000164690.7	35.6717	1.12188	0.346773	3.23519	0.00121562	0.00748245	SHH
ENSG00000164816.7	0.840009	-2.13827	0.727562	-2.93895	0.0032933	0.0166131	DEFA5
ENSG00000164920.9	1371.65	-1.38944	0.206217	-6.73775	1.61e-11	8.15e-10	OSR2
ENSG00000164949.7	483.335	-1.25834	0.199163	-6.31816	2.65e-10	1.06e-08	GEM
ENSG00000165030.3	2042.77	-1.14654	0.157529	-7.27827	3.38e-13	2.3e-11	NFIL3
ENSG00000165072.9	1261.52	-2.93303	0.256115	-11.452	2.3e-30	1.78e-27	MAMDC2
ENSG00000165092.12	2540.54	-1.24965	0.202595	-6.16823	6.91e-10	2.54e-08	ALDH1A1
ENSG00000165121.10	64.8168	-1.06489	0.166312	-6.40294	1.52e-10	6.47e-09	RP11-213G2.3
ENSG00000165197.4	55.1937	-3.13775	0.290845	-10.7884	3.91e-27	1.96e-24	FIGF
ENSG00000165246.12	2.02435	-2.59966	0.670163	-3.87915	0.00010482	0.000993479	NLGN4Y
ENSG00000165269.12	72.3618	-1.11105	0.217074	-5.11829	3.08e-07	6.23e-06	AQP7
ENSG00000165370.1	0.814835	-1.61484	0.582356	-2.77294	0.00555531	0.0250724	GPR101
ENSG00000165376.10	10.9232	-1.09428	0.254596	-4.29811	1.72e-05	0.000214293	CLDN2
ENSG00000165507.8	5757.67	-1.24456	0.196081	-6.34717	2.19e-10	8.99e-09	C10orf10
ENSG00000165521.15	943.068	-1.19974	0.158471	-7.57075	3.71e-14	2.94e-12	EML5
ENSG00000165556.9	2.9792	1.82004	0.382052	4.76385	1.9e-06	3.13e-05	CDX2
ENSG00000165583.13	3.47357	-1.7752	0.65445	-2.71251	0.00667753	0.0289461	SSX5
ENSG00000165623.9	3.08856	-1.49039	0.448848	-3.32048	0.000898622	0.00588799	UCMA
ENSG00000165633.12	1189.53	-1.0104	0.215928	-4.67934	2.88e-06	4.5e-05	VSTM4
ENSG00000165643.10	3.84271	-1.57383	0.390899	-4.02618	5.67e-05	0.000592283	SOHLH1
ENSG00000165646.11	107.328	-2.74041	0.338606	-8.0932	5.81e-16	6.52e-14	SLC18A2
ENSG00000165795.20	7907.41	-1.32836	0.206327	-6.43814	1.21e-10	5.26e-09	NDRG2
ENSG00000165953.9	4.91734	-1.25346	0.358869	-3.49281	0.000477968	0.0035153	SERPINA12
ENSG00000165966.14	102.471	-1.18957	0.248511	-4.78679	1.69e-06	2.83e-05	PDZRN4
ENSG00000165995.18	295.232	-2.58005	0.245248	-10.5201	6.98e-26	2.9e-23	CACNB2
ENSG00000166086.12	1546.51	-1.15564	0.188941	-6.11639	9.57e-10	3.4e-08	JAM3
ENSG00000166091.19	7.82061	-1.76171	0.319274	-5.51786	3.43e-08	8.72e-07	CMTM5
ENSG00000166118.7	1.13602	1.25874	0.406492	3.0966	0.00195753	0.0109384	SPATA19
ENSG00000166183.15	412.683	-1.96639	0.248577	-7.91061	2.56e-15	2.52e-13	ASPG
ENSG00000166432.14	862.795	-2.00147	0.224543	-8.9135	4.94e-19	8.78e-17	ZMAT1
ENSG00000166482.11	4707.36	-1.12015	0.220239	-5.08604	3.66e-07	7.25e-06	MFAP4
ENSG00000166510.13	341.968	-1.88264	0.23175	-8.1236	4.53e-16	5.15e-14	CCDC68
ENSG00000166592.11	492.091	-1.20579	0.204091	-5.90808	3.46e-09	1.09e-07	RRAD
ENSG00000166676.14	260.986	-1.00202	0.18737	-5.34781	8.9e-08	2.04e-06	TVP23A
ENSG00000166707.10	117.755	-1.73354	0.226598	-7.65032	2e-14	1.68e-12	ZCCHC18
ENSG00000166743.9	38.1901	-1.22151	0.195249	-6.25617	3.95e-10	1.52e-08	ACSM1
ENSG00000166793.10	328.612	-1.79433	0.214296	-8.37317	5.61e-17	7.33e-15	YPEL4
ENSG00000166800.9	8.39527	-1.45716	0.245349	-5.93913	2.87e-09	9.21e-08	LDHAL6A
ENSG00000166819.11	161.765	-1.02512	0.245559	-4.17466	2.98e-05	0.000345028	PLIN1
ENSG00000166917.8	354.194	-4.03228	0.515783	-7.81779	5.38e-15	4.92e-13	MIR202HG
ENSG00000166947.11	3.52337	-1.06794	0.270247	-3.95171	7.76e-05	0.00077529	EPB42
ENSG00000166960.16	56.9696	-1.52905	0.192604	-7.93884	2.04e-15	2.07e-13	CCDC178
ENSG00000167081.16	1498.79	-1.11347	0.173035	-6.43493	1.24e-10	5.36e-09	PBX3
ENSG00000167280.16	1543	-1.10835	0.165612	-6.69243	2.19e-11	1.08e-09	ENGASE
ENSG00000167281.18	33.5406	-1.36636	0.266398	-5.12903	2.91e-07	5.94e-06	RBFOX3
ENSG00000167332.7	12.615	-1.50797	0.272417	-5.53553	3.1e-08	7.96e-07	OR51E2
ENSG00000167371.16	1728.84	-3.25555	0.264887	-12.2903	1.02e-34	1.45e-31	PRRT2
ENSG00000167549.18	193.288	-2.00969	0.221312	-9.0808	1.08e-19	2.11e-17	CORO6
ENSG00000167580.7	19.8058	1.0355	0.238248	4.34633	1.38e-05	0.000176988	AQP2
ENSG00000167615.16	15557.7	-1.02008	0.167204	-6.10083	1.06e-09	3.71e-08	LENG8
ENSG00000167641.10	1375.25	-1.20135	0.168029	-7.14966	8.7e-13	5.54e-11	PPP1R14A
ENSG00000167676.4	1195.1	-2.16143	0.225822	-9.57139	1.05e-21	2.59e-19	PLIN4
ENSG00000167766.18	3758.12	-1.00694	0.158659	-6.34659	2.2e-10	9.01e-09	ZNF83
ENSG00000167768.4	26.8641	-3.64787	0.436625	-8.35469	6.56e-17	8.45e-15	KRT1
ENSG00000167779.7	1864.18	-1.69692	0.217871	-7.78865	6.77e-15	6.03e-13	IGFBP6
ENSG00000167995.15	304.662	-1.15092	0.145848	-7.89124	2.99e-15	2.91e-13	BEST1
ENSG00000168010.10	1422.52	-1.21766	0.170075	-7.15955	8.09e-13	5.18e-11	ATG16L2
ENSG00000168079.16	286.243	-3.86603	0.344034	-11.2374	2.67e-29	1.69e-26	SCARA5
ENSG00000168209.4	11726.9	-1.39744	0.208071	-6.71615	1.87e-11	9.28e-10	DDIT4
ENSG00000168243.10	720.266	-1.65888	0.24972	-6.64295	3.07e-11	1.48e-09	GNG4
ENSG00000168267.5	6.73831	-1.59642	0.462206	-3.45391	0.00055252	0.00396362	PTF1A
ENSG00000168333.13	1.25473	-2.4444	0.661248	-3.69665	0.000218466	0.00184503	C8orf22
ENSG00000168405.14	378.914	-1.13083	0.185925	-6.08217	1.19e-09	4.12e-08	CMAHP
ENSG00000168477.17	5252.35	-1.84116	0.254255	-7.2414	4.44e-13	2.96e-11	TNXB
ENSG00000168484.12	3.57113	-2.60805	0.473383	-5.50938	3.6e-08	9.12e-07	SFTPC
ENSG00000168490.13	167.547	-2.55282	0.242887	-10.5103	7.74e-26	3.14e-23	PHYHIP
ENSG00000168497.4	696.584	-1.63047	0.211235	-7.71874	1.17e-14	1.02e-12	SDPR
ENSG00000168509.17	3.14342	-1.00714	0.25923	-3.88511	0.000102285	0.000972422	HFE2
ENSG00000168515.3	93.9479	-1.29436	0.360989	-3.58561	0.000336296	0.00264135	SCGB1D1
ENSG00000168530.15	4.29316	-4.29615	0.713047	-6.02505	1.69e-09	5.73e-08	MYL1
ENSG00000168785.7	1027.13	-1.23512	0.198637	-6.21797	5.04e-10	1.9e-08	TSPAN5
ENSG00000168925.10	19.0643	-5.81624	0.546929	-10.6343	2.06e-26	9.38e-24	CTRB1
ENSG00000168928.12	28.0711	-3.63682	0.341628	-10.6456	1.83e-26	8.43e-24	CTRB2
ENSG00000168970.20	1251.84	-1.04717	0.186956	-5.60117	2.13e-08	5.69e-07	JMJD7-PLA2G4B
ENSG00000169006.6	32.1227	-1.27382	0.245409	-5.19058	2.1e-07	4.39e-06	NTSR2
ENSG00000169031.18	209.125	-2.26841	0.272484	-8.32494	8.44e-17	1.07e-14	COL4A3
ENSG00000169085.11	79.4211	-1.21918	0.190248	-6.40836	1.47e-10	6.3e-09	C8orf46
ENSG00000169154.5	1.02311	-2.15475	0.535173	-4.02627	5.67e-05	0.000592283	GOT1L1
ENSG00000169297.7	66.0296	-1.25339	0.304969	-4.1099	3.96e-05	0.000439232	NR0B1
ENSG00000169347.16	23.98	-6.26841	0.799465	-7.84076	4.48e-15	4.15e-13	GP2
ENSG00000169469.8	35.979	-2.03478	0.480452	-4.23515	2.28e-05	0.000274332	SPRR1B
ENSG00000169474.4	3.01883	-1.52334	0.478752	-3.18189	0.00146318	0.00867858	SPRR1A
ENSG00000169605.5	1.87268	-3.16381	0.667794	-4.7377	2.16e-06	3.5e-05	GKN1
ENSG00000170128.3	13.1142	1.05182	0.254349	4.13533	3.54e-05	0.000400751	GPR25
ENSG00000170160.16	119.371	-2.01018	0.288325	-6.97191	3.13e-12	1.8e-10	CCDC144A
ENSG00000170262.12	11.8921	-2.67812	0.399089	-6.71058	1.94e-11	9.6e-10	MRAP
ENSG00000170323.8	282.934	-1.49419	0.349069	-4.2805	1.86e-05	0.000228801	FABP4
ENSG00000170465.9	10.0464	-1.35764	0.308253	-4.40432	1.06e-05	0.00014079	KRT6C
ENSG00000170516.16	8.84007	-2.88597	0.841398	-3.42997	0.000603644	0.00427108	COX7B2
ENSG00000170549.3	8.92658	-1.06624	0.392865	-2.71402	0.00664729	0.0288591	IRX1
ENSG00000170801.9	2121.4	-1.16965	0.202758	-5.7687	7.99e-09	2.32e-07	HTRA3
ENSG00000170807.11	2.42623	-2.25346	0.366842	-6.14286	8.1e-10	2.92e-08	LMOD2
ENSG00000170820.11	12.1533	-1.31813	0.38559	-3.41848	0.00062973	0.00442172	FSHR
ENSG00000170890.13	23.3698	-1.82496	0.249017	-7.32866	2.32e-13	1.61e-11	PLA2G1B
ENSG00000170893.3	44.0998	-1.79379	0.298832	-6.00266	1.94e-09	6.5e-08	TRH
ENSG00000170935.6	0.945901	-1.25618	0.408753	-3.07319	0.00211784	0.0116481	NCBP2L
ENSG00000170962.12	1421.14	-1.0996	0.196634	-5.59211	2.24e-08	5.95e-07	PDGFD
ENSG00000170965.9	61.4727	-1.42542	0.290756	-4.90246	9.46e-07	1.68e-05	PLAC1
ENSG00000171004.17	356.795	-1.54644	0.237835	-6.50216	7.92e-11	3.54e-09	HS6ST2
ENSG00000171195.10	9.50597	-3.89752	0.776033	-5.02236	5.1e-07	9.67e-06	MUC7
ENSG00000171401.14	180.214	-1.58775	0.29931	-5.3047	1.13e-07	2.53e-06	KRT13
ENSG00000171402.14	2.92117	-2.33911	0.637486	-3.66927	0.000243244	0.00201248	XAGE3
ENSG00000171408.13	435.967	-1.32606	0.204303	-6.49063	8.55e-11	3.81e-09	PDE7B
ENSG00000171431.3	1.23525	-1.5662	0.440306	-3.55708	0.000374996	0.00289204	KRT20
ENSG00000171444.17	3283.9	-2.25108	0.233139	-9.65551	4.66e-22	1.19e-19	MCC
ENSG00000171487.14	2.89906	-2.64244	0.614703	-4.29873	1.72e-05	0.000213775	NLRP5
ENSG00000171495.16	1.22166	-2.08976	0.408679	-5.11344	3.16e-07	6.37e-06	MROH2B
ENSG00000171502.14	165.745	-1.08697	0.221411	-4.90929	9.14e-07	1.63e-05	COL24A1
ENSG00000171551.11	1938.37	-1.77185	0.29049	-6.09953	1.06e-09	3.74e-08	ECEL1
ENSG00000171557.16	15.8457	-2.41554	0.41702	-5.7924	6.94e-09	2.05e-07	FGG
ENSG00000171560.14	9.77266	-2.74793	0.549791	-4.99813	5.79e-07	1.08e-05	FGA
ENSG00000171564.11	6.81955	-3.55351	0.700993	-5.06925	3.99e-07	7.81e-06	FGB
ENSG00000171747.8	35.846	-1.08437	0.201683	-5.37663	7.59e-08	1.77e-06	LGALS4
ENSG00000171766.15	1783.38	-1.27228	0.200783	-6.3366	2.35e-10	9.53e-09	GATM
ENSG00000171798.17	457.804	-2.1604	0.276282	-7.81953	5.3e-15	4.86e-13	KNDC1
ENSG00000171817.16	212.115	-2.7022	0.240986	-11.2131	3.52e-29	2.1e-26	ZNF540
ENSG00000171885.13	48.6506	-1.57907	0.258485	-6.10894	1e-09	3.55e-08	AQP4
ENSG00000172016.15	3.76551	-1.83849	0.485498	-3.78682	0.00015259	0.00136182	REG3A
ENSG00000172023.7	9.11011	-4.39318	0.659178	-6.66464	2.65e-11	1.28e-09	REG1B
ENSG00000172179.11	18.2508	-3.09474	0.413265	-7.48853	6.97e-14	5.21e-12	PRL
ENSG00000172260.13	210.867	-1.25104	0.23199	-5.39264	6.94e-08	1.64e-06	NEGR1
ENSG00000172346.14	2295.5	-3.19202	0.284522	-11.2189	3.29e-29	2.01e-26	CSDC2
ENSG00000172399.5	14.6195	-2.01203	0.255203	-7.88401	3.17e-15	3.05e-13	MYOZ2
ENSG00000172403.10	2145.82	-1.57773	0.219877	-7.17553	7.2e-13	4.64e-11	SYNPO2
ENSG00000172465.13	1816.55	-1.30555	0.168135	-7.76488	8.17e-15	7.22e-13	TCEAL1
ENSG00000172476.3	88.4964	-1.06488	0.170058	-6.26186	3.8e-10	1.47e-08	RAB40A
ENSG00000172824.14	349.21	-1.43749	0.214182	-6.71151	1.93e-11	9.56e-10	CES4A
ENSG00000172867.3	9.52605	-3.45987	0.514167	-6.72908	1.71e-11	8.58e-10	KRT2
ENSG00000172901.19	49.4607	-2.36081	0.270995	-8.71163	3e-18	4.77e-16	LVRN
ENSG00000173068.17	2085.51	-1.05596	0.186072	-5.67502	1.39e-08	3.85e-07	BNC2
ENSG00000173114.12	65.7899	-1.10793	0.195168	-5.67681	1.37e-08	3.81e-07	LRRN3
ENSG00000173258.12	78.0418	-1.07137	0.183965	-5.82379	5.75e-09	1.72e-07	ZNF483
ENSG00000173376.13	373.455	-1.67697	0.269779	-6.21609	5.1e-10	1.93e-08	NDNF
ENSG00000173401.9	2.33163	-1.108	0.277182	-3.99738	6.4e-05	0.00065924	GLIPR1L1
ENSG00000173421.16	73.3407	-1.50578	0.219383	-6.86372	6.71e-12	3.66e-10	CCDC36
ENSG00000173597.8	26.9057	-1.04878	0.192958	-5.4353	5.47e-08	1.33e-06	SULT1B1
ENSG00000173641.17	527.944	-1.56737	0.229426	-6.83169	8.39e-12	4.47e-10	HSPB7
ENSG00000173714.7	3185.73	-6.25331	0.407605	-15.3416	4.03e-53	1.38e-48	WFIKKN2
ENSG00000173809.15	86.5894	-1.25521	0.254984	-4.92269	8.54e-07	1.53e-05	TDRD12
ENSG00000173867.8	19.5672	-1.40675	0.231758	-6.06988	1.28e-09	4.42e-08	RP11-97O12.7
ENSG00000174156.13	7.39749	-1.13867	0.369544	-3.08129	0.00206104	0.0114056	GSTA3
ENSG00000174348.13	4059.21	-2.20635	0.252193	-8.74866	2.16e-18	3.49e-16	PODN
ENSG00000174403.15	13.0707	-1.3588	0.295829	-4.59321	4.36e-06	6.51e-05	C20orf166-AS1
ENSG00000174407.11	0.773558	-1.8438	0.571649	-3.2254	0.00125796	0.0076776	MIR1-1HG
ENSG00000174460.3	114.093	-1.04771	0.233196	-4.49282	7.03e-06	9.88e-05	ZCCHC12
ENSG00000174576.8	12.0451	-1.3799	0.270742	-5.09673	3.46e-07	6.91e-06	NPAS4
ENSG00000174740.7	90.3962	-1.38244	0.223512	-6.18508	6.21e-10	2.31e-08	PABPC5
ENSG00000174827.13	60.0552	1.1601	0.195124	5.94545	2.76e-09	8.91e-08	PDZK1
ENSG00000174990.4	1.60451	-1.1162	0.303866	-3.67333	0.000239412	0.00198652	CA5A
ENSG00000175084.11	2732.48	-1.96196	0.25886	-7.57924	3.48e-14	2.79e-12	DES
ENSG00000175206.10	17.0381	-2.1119	0.292796	-7.21287	5.48e-13	3.59e-11	NPPA
ENSG00000175265.17	6896.56	-1.51868	0.215902	-7.03411	2.01e-12	1.2e-10	GOLGA8A
ENSG00000175311.6	1.0672	-1.44325	0.531856	-2.71362	0.0066553	0.0288807	ANKS4B
ENSG00000175445.14	434.319	-1.00807	0.183287	-5.49994	3.8e-08	9.54e-07	LPL
ENSG00000175518.6	56.9361	-1.12902	0.189429	-5.96013	2.52e-09	8.26e-08	UBQLNL
ENSG00000175535.6	22.0423	-6.97776	0.806049	-8.65675	4.85e-18	7.46e-16	PNLIP
ENSG00000175646.3	2.03259	-3.49356	0.620934	-5.62631	1.84e-08	4.99e-07	PRM1
ENSG00000175718.9	0.637628	-1.17463	0.447534	-2.62467	0.00867326	0.0356608	RBMXL3
ENSG00000175745.11	1868.21	-1.04703	0.193603	-5.40812	6.37e-08	1.52e-06	NR2F1
ENSG00000175800.5	1.41197	-1.1899	0.333735	-3.5654	0.000363306	0.00281781	OR52B3P
ENSG00000175967.3	9.53197	-1.34803	0.286427	-4.70636	2.52e-06	4e-05	RP11-544L8__B.4
ENSG00000176194.17	10.0934	-1.64177	0.408762	-4.01646	5.91e-05	0.000614413	CIDEA
ENSG00000176198.2	1.25511	-1.15232	0.440987	-2.61306	0.00897367	0.0366634	OR11H4
ENSG00000176302.12	2.06529	-1.16406	0.333967	-3.48554	0.000491149	0.00359905	FOXR1
ENSG00000176438.12	459.634	-1.01931	0.18043	-5.64932	1.61e-08	4.42e-07	SYNE3
ENSG00000176716.4	2.0673	-1.08664	0.329093	-3.30193	0.00096023	0.00620349	OR10AB1P
ENSG00000176769.9	70.0809	-1.47441	0.318919	-4.62315	3.78e-06	5.77e-05	TCERG1L
ENSG00000176868.2	689.025	-4.33752	0.605774	-7.16028	8.05e-13	5.16e-11	RP11-334J6.7
ENSG00000177133.10	81.449	-1.14319	0.322711	-3.54245	0.000396427	0.0030272	LINC00982
ENSG00000177138.15	1.67149	-2.10121	0.487839	-4.30719	1.65e-05	0.000206521	FAM9B
ENSG00000177363.4	456.01	-1.73487	0.216091	-8.02843	9.87e-16	1.06e-13	LRRN4CL
ENSG00000177519.3	218.252	-1.28469	0.231594	-5.54714	2.9e-08	7.5e-07	RPRM
ENSG00000177551.5	1.113	-2.0286	0.548078	-3.7013	0.000214496	0.00181781	NHLH2
ENSG00000177627.9	6.31984	-2.19061	0.306628	-7.14421	9.05e-13	5.73e-11	C12orf54
ENSG00000177807.6	55.6241	1.23464	0.174481	7.07609	1.48e-12	9e-11	KCNJ10
ENSG00000177875.4	189.626	-1.15354	0.183193	-6.29688	3.04e-10	1.2e-08	CCDC184
ENSG00000177990.11	445.23	-2.36801	0.237681	-9.96298	2.21e-23	6.62e-21	DPY19L2
ENSG00000178115.11	23.1015	-1.86003	0.307693	-6.04508	1.49e-09	5.11e-08	GOLGA8Q
ENSG00000178287.17	5.07246	-1.32702	0.509307	-2.60554	0.00917298	0.0372851	SPAG11A
ENSG00000178363.4	17.1928	-1.68038	0.308921	-5.43951	5.34e-08	1.3e-06	CALML3
ENSG00000178394.4	2.39335	-2.06197	0.526016	-3.91998	8.86e-05	0.000865536	HTR1A
ENSG00000178473.6	5.17338	-1.17931	0.419199	-2.81326	0.00490425	0.0227604	UCN3
ENSG00000178803.10	10.0778	-1.18809	0.207081	-5.73734	9.62e-09	2.75e-07	ADORA2A-AS1
ENSG00000178828.6	3.71177	-1.34867	0.453005	-2.97716	0.00290929	0.0150179	RNF186
ENSG00000179008.8	10.9015	-1.24709	0.350115	-3.56194	0.000368126	0.00284872	C14orf39
ENSG00000179094.13	6248.37	-2.24894	0.212733	-10.5716	4.03e-26	1.76e-23	PER1
ENSG00000179111.8	9.34674	-1.95801	0.247307	-7.91735	2.43e-15	2.4e-13	HES7
ENSG00000179242.15	335.21	-2.59641	0.307781	-8.43589	3.29e-17	4.45e-15	CDH4
ENSG00000179270.6	15.1512	-1.35828	0.297728	-4.56214	5.06e-06	7.42e-05	C2orf71
ENSG00000179304.16	820.784	-1.26597	0.151941	-8.33197	7.95e-17	1.01e-14	FAM156B
ENSG00000179636.14	4.52578	-1.99486	0.332743	-5.99519	2.03e-09	6.78e-08	TPPP2
ENSG00000179751.6	2.89426	-3.5731	0.554342	-6.44566	1.15e-10	5.01e-09	SYCN
ENSG00000179914.4	93.8563	-1.81054	0.288411	-6.27766	3.44e-10	1.35e-08	ITLN1
ENSG00000179915.20	20.784	-1.60028	0.346681	-4.61599	3.91e-06	5.94e-05	NRXN1
ENSG00000180139.11	251.031	-1.2712	0.217882	-5.83434	5.4e-09	1.63e-07	ACTA2-AS1
ENSG00000180287.16	36.5894	-2.04415	0.419944	-4.86767	1.13e-06	1.97e-05	PLD5
ENSG00000180305.4	0.684641	-1.08318	0.394954	-2.74254	0.00609662	0.027001	WFDC10A
ENSG00000180347.13	1.47505	1.02719	0.393772	2.60859	0.00909163	0.0370254	CCDC129
ENSG00000180422.3	20.6673	-3.8881	0.397923	-9.77097	1.5e-22	4e-20	LINC00304
ENSG00000180581.7	116.283	1.1817	0.185238	6.37936	1.78e-10	7.44e-09	SRP9P1
ENSG00000180660.7	18.3474	-1.56491	0.267404	-5.85221	4.85e-09	1.48e-07	MAB21L1
ENSG00000180772.6	5.7454	-1.54214	0.544568	-2.83185	0.00462789	0.021724	AGTR2
ENSG00000180875.4	123.025	-2.13626	0.272979	-7.82573	5.05e-15	4.67e-13	GREM2
ENSG00000181074.3	9.9302	-1.92734	0.312773	-6.16212	7.18e-10	2.62e-08	OR52N4
ENSG00000181092.9	72.5405	-1.93265	0.468874	-4.12189	3.76e-05	0.000421369	ADIPOQ
ENSG00000181195.10	193.617	-3.54077	0.368509	-9.60836	7.37e-22	1.84e-19	PENK
ENSG00000181374.7	39.4085	1.34886	0.266534	5.06075	4.18e-07	8.08e-06	CCL13
ENSG00000181656.6	50.9909	-2.14984	0.26631	-8.07269	6.88e-16	7.59e-14	GPR88
ENSG00000181800.5	24.2611	-2.36261	0.321633	-7.34567	2.05e-13	1.43e-11	CELF2-AS1
ENSG00000181997.8	1.8456	-2.35847	0.525905	-4.48459	7.31e-06	0.000102381	AQP7P2
ENSG00000182050.13	5.96836	-1.0163	0.29738	-3.41751	0.000631959	0.00443554	MGAT4C
ENSG00000182223.7	1.18994	-1.32294	0.430841	-3.0706	0.00213628	0.0117325	ZAR1
ENSG00000182230.11	1530.01	-2.80063	0.280988	-9.96707	2.12e-23	6.41e-21	FAM153B
ENSG00000182253.14	658.195	-1.38645	0.20263	-6.84227	7.8e-12	4.15e-10	SYNM
ENSG00000182333.14	17.5183	-1.36854	0.390227	-3.50703	0.000453138	0.00337268	LIPF
ENSG00000182397.14	15.6723	-1.14151	0.257926	-4.42574	9.61e-06	0.000129481	DNM1P46
ENSG00000182575.7	214.919	-1.33781	0.202275	-6.6138	3.75e-11	1.77e-09	NXPH3
ENSG00000182836.9	1061.94	-2.27881	0.317109	-7.1862	6.66e-13	4.31e-11	PLCXD3
ENSG00000182916.7	208.009	-1.67129	0.215859	-7.74253	9.75e-15	8.57e-13	TCEAL7
ENSG00000183117.17	33.9955	-1.26199	0.341844	-3.69172	0.000222743	0.00187142	CSMD1
ENSG00000183171.5	29.2062	-1.98147	0.263683	-7.5146	5.71e-14	4.34e-12	RP11-49C9.2
ENSG00000183230.16	37.6318	-1.33235	0.244414	-5.4512	5e-08	1.23e-06	CTNNA3
ENSG00000183260.6	60.7291	-2.87945	0.701213	-4.10639	4.02e-05	0.000444666	ABHD16B
ENSG00000183287.13	639.584	-3.40821	0.290675	-11.7252	9.47e-32	9.23e-29	CCBE1
ENSG00000183324.10	0.985556	-1.49541	0.523527	-2.85641	0.00428465	0.0204179	REC114
ENSG00000183426.15	4024.51	-1.06576	0.152349	-6.9955	2.64e-12	1.54e-10	NPIPA1
ENSG00000183506.16	1414.55	-1.00611	0.155904	-6.45338	1.09e-10	4.77e-09	PI4KAP2
ENSG00000183569.17	306.747	-1.0994	0.183375	-5.99537	2.03e-09	6.78e-08	SERHL2
ENSG00000183571.9	2.27518	-1.18055	0.314865	-3.74938	0.000177271	0.00154534	PGPEP1L
ENSG00000183578.5	234.947	-1.82969	0.202849	-9.01996	1.88e-19	3.53e-17	TNFAIP8L3
ENSG00000183770.5	827.866	-1.71013	0.312601	-5.47065	4.48e-08	1.11e-06	FOXL2
ENSG00000183783.6	27.3906	-2.56352	0.350396	-7.31605	2.55e-13	1.76e-11	KCTD8
ENSG00000183793.13	562.462	-1.08765	0.224609	-4.84238	1.28e-06	2.2e-05	NPIPA5
ENSG00000183798.4	301.512	-2.09185	0.246086	-8.50051	1.89e-17	2.64e-15	EMILIN3
ENSG00000183929.7	16.131	-2.00764	0.330295	-6.07833	1.21e-09	4.21e-08	DUSP5P1
ENSG00000184113.9	519.428	-1.06764	0.163478	-6.53078	6.54e-11	2.98e-09	CLDN5
ENSG00000184139.8	4.71176	-1.10884	0.395601	-2.80292	0.00506422	0.023341	RPL7AP28
ENSG00000184205.14	7584.42	-3.16449	0.243862	-12.9766	1.66e-38	4.36e-35	TSPYL2
ENSG00000184206.11	469.223	-2.52225	0.234054	-10.7763	4.45e-27	2.17e-24	GOLGA6L4
ENSG00000184271.15	726.076	-1.43905	0.174117	-8.26485	1.4e-16	1.7e-14	POU6F1
ENSG00000184357.4	27.3055	-1.12299	0.259643	-4.32512	1.52e-05	0.000192243	HIST1H1B
ENSG00000184601.10	13.4355	-2.25459	0.431311	-5.22729	1.72e-07	3.69e-06	C14orf180
ENSG00000184608.8	1.41796	-2.61543	0.720378	-3.63063	0.00028273	0.00228644	FAM167A-AS1
ENSG00000184672.11	11.2561	1.24388	0.406095	3.06302	0.00219116	0.0119588	RALYL
ENSG00000184811.3	29.5129	-2.2113	0.411711	-5.37099	7.83e-08	1.82e-06	TUSC5
ENSG00000184905.8	656.577	-1.70285	0.255173	-6.67332	2.5e-11	1.22e-09	TCEAL2
ENSG00000184911.14	44.3396	-1.40623	0.280992	-5.00453	5.6e-07	1.05e-05	DMRTC1B
ENSG00000185053.12	7.1772	-3.41661	0.533834	-6.40013	1.55e-10	6.59e-09	SGCZ
ENSG00000185070.10	1604.76	-1.33161	0.22134	-6.01612	1.79e-09	6.02e-08	FLRT2
ENSG00000185186.8	13.6434	-1.61095	0.24469	-6.58364	4.59e-11	2.15e-09	LINC00313
ENSG00000185203.11	9.53732	-1.7754	0.360884	-4.9196	8.67e-07	1.56e-05	WASIR1
ENSG00000185271.6	6.93153	-2.06697	0.356906	-5.79134	6.98e-09	2.06e-07	KLHL33
ENSG00000185386.14	284.942	-1.01171	0.172514	-5.8645	4.51e-09	1.38e-07	MAPK11
ENSG00000185559.13	4377.25	-2.92167	0.445791	-6.55389	5.61e-11	2.58e-09	DLK1
ENSG00000185594.4	0.938891	-1.5818	0.473461	-3.34093	0.000834968	0.00555739	SPATA8
ENSG00000185641.6	295.287	-1.28084	0.159551	-8.02774	9.93e-16	1.06e-13	CTD-2287O16.1
ENSG00000185689.15	11.3084	-1.08335	0.215503	-5.02709	4.98e-07	9.45e-06	C6orf201
ENSG00000185792.9	1.14792	-2.0245	0.662973	-3.05367	0.00226061	0.0122867	NLRP9
ENSG00000185823.3	32.9682	-2.17785	0.409373	-5.31997	1.04e-07	2.35e-06	NPAP1
ENSG00000185873.7	2.34309	-1.03984	0.391331	-2.65719	0.00787946	0.0330435	TMPRSS11B
ENSG00000185988.11	6.88415	-2.09899	0.334016	-6.28409	3.3e-10	1.3e-08	PLK5
ENSG00000186105.7	72.4253	-1.2396	0.181045	-6.84692	7.55e-12	4.05e-10	LRRC70
ENSG00000186204.14	154.341	-1.8072	0.281606	-6.41748	1.39e-10	5.97e-09	CYP4F12
ENSG00000186399.10	112.501	-1.9109	0.242981	-7.86439	3.71e-15	3.5e-13	GOLGA8R
ENSG00000186453.12	14.1066	-1.09516	0.228071	-4.80186	1.57e-06	2.65e-05	FAM228A
ENSG00000186466.5	3.92034	-1.57184	0.598876	-2.62464	0.00867396	0.0356608	AQP7P1
ENSG00000186526.12	5.15404	1.06958	0.353679	3.02415	0.00249329	0.0132743	CYP4F8
ENSG00000186642.15	349.035	-1.11575	0.183901	-6.06715	1.3e-09	4.5e-08	PDE2A
ENSG00000186675.6	16.11	-1.05222	0.25316	-4.15636	3.23e-05	0.000370071	MAGEE2
ENSG00000186732.13	33.0402	-2.63122	0.404439	-6.50583	7.73e-11	3.47e-09	MPPED1
ENSG00000186838.13	19.5752	-1.00892	0.328417	-3.07206	0.00212586	0.0116847	SELV
ENSG00000186854.10	662.989	-1.14602	0.237832	-4.81861	1.45e-06	2.45e-05	TRABD2A
ENSG00000186867.10	2.49563	-1.35374	0.338719	-3.99664	6.42e-05	0.000660903	QRFPR
ENSG00000187021.14	4.3902	-3.5114	0.492494	-7.12982	1e-12	6.31e-11	PNLIPRP1
ENSG00000187134.12	272.744	-1.74808	0.207071	-8.44193	3.12e-17	4.28e-15	AKR1C1
ENSG00000187151.7	99.0881	-5.53128	0.476825	-11.6002	4.11e-31	3.59e-28	ANGPTL5
ENSG00000187166.1	6.53374	-2.40135	0.336646	-7.13316	9.81e-13	6.17e-11	H1FNT
ENSG00000187268.11	28.1368	-2.6303	0.473895	-5.55038	2.85e-08	7.37e-07	FAM9C
ENSG00000187288.10	28.6361	-1.14429	0.287318	-3.98265	6.82e-05	0.000694348	CIDEC
ENSG00000187479.5	6112.25	-3.47982	0.270354	-12.8713	6.53e-38	1.59e-34	C11orf96
ENSG00000187690.3	10.845	-1.61712	0.294532	-5.49046	4.01e-08	1e-06	CXorf67
ENSG00000187758.7	2.78844	-1.80405	0.361558	-4.98966	6.05e-07	1.12e-05	ADH1A
ENSG00000187800.13	630.111	-1.51867	0.220485	-6.88789	5.66e-12	3.13e-10	PEAR1
ENSG00000187908.15	502.089	1.40311	0.329619	4.25677	2.07e-05	0.000251227	DMBT1
ENSG00000187922.13	285.181	-1.09686	0.237834	-4.61188	3.99e-06	6.04e-05	LCN10
ENSG00000188000.3	10.1877	-1.11766	0.319023	-3.50337	0.000459411	0.00340747	OR7D2
ENSG00000188038.7	22.6295	-1.27617	0.18775	-6.79719	1.07e-11	5.59e-10	NRN1L
ENSG00000188076.2	10.5228	-1.59355	0.383405	-4.15632	3.23e-05	0.000370071	SCGB1C1
ENSG00000188130.13	530.561	-1.11146	0.180378	-6.16185	7.19e-10	2.62e-08	MAPK12
ENSG00000188257.10	1553.02	-3.92392	0.33481	-11.7198	1.01e-31	9.56e-29	PLA2G2A
ENSG00000188385.11	120.495	-1.87239	0.263402	-7.10849	1.17e-12	7.25e-11	JAKMIP3
ENSG00000188388.10	21.2248	-3.05182	0.387031	-7.8852	3.14e-15	3.03e-13	GOLGA6L3
ENSG00000188394.6	5.16811	-1.16215	0.270644	-4.29403	1.75e-05	0.000217799	GPR21
ENSG00000188487.11	4.51934	-1.05852	0.32478	-3.25918	0.00111737	0.00699477	INSC
ENSG00000188536.12	2212.11	-1.29227	0.208739	-6.19088	5.98e-10	2.23e-08	HBA2
ENSG00000188582.8	1.10113	-1.51431	0.453319	-3.34049	0.000836298	0.00556189	PAQR9
ENSG00000188599.17	771.202	-1.13357	0.131489	-8.62105	6.63e-18	9.93e-16	NPIPP1
ENSG00000188626.6	50.1795	-3.71913	0.417121	-8.91618	4.83e-19	8.62e-17	GOLGA8M
ENSG00000188662.6	3.76683	-1.16823	0.28353	-4.1203	3.78e-05	0.000423453	HILS1
ENSG00000188730.4	297.079	-2.09404	0.321895	-6.50536	7.75e-11	3.48e-09	VWC2
ENSG00000188778.4	212.847	-4.82658	0.404572	-11.9301	8.25e-33	9.08e-30	ADRB3
ENSG00000188783.5	7127.57	-1.20729	0.209451	-5.76406	8.21e-09	2.38e-07	PRELP
ENSG00000188828.11	5.67112	-3.53373	0.472295	-7.48204	7.32e-14	5.45e-12	GLRA4
ENSG00000188906.13	498.689	-1.32831	0.224641	-5.91302	3.36e-09	1.06e-07	LRRK2
ENSG00000188933.14	535.186	-1.63732	0.279867	-5.85034	4.91e-09	1.5e-07	USP32P1
ENSG00000189058.8	1133.44	-1.14392	0.194568	-5.8793	4.12e-09	1.28e-07	APOD
ENSG00000189064.8	39.676	-2.3318	0.818911	-2.84744	0.00440722	0.0208856	GAGE2A
ENSG00000189134.3	15.4243	-1.39728	0.201969	-6.91828	4.57e-12	2.56e-10	NKAPL
ENSG00000189136.8	132.982	-2.00704	0.213464	-9.40222	5.34e-21	1.2e-18	UBE2Q2P1
ENSG00000189182.9	1.48221	-1.23279	0.470935	-2.61776	0.00885087	0.0362559	KRT77
ENSG00000189212.12	24.4348	-1.27232	0.213076	-5.97123	2.35e-09	7.79e-08	DPY19L2P1
ENSG00000189221.9	1315.13	-1.47942	0.211259	-7.00286	2.51e-12	1.46e-10	MAOA
ENSG00000189269.12	14.3679	-1.32591	0.226703	-5.84868	4.95e-09	1.51e-07	DRICH1
ENSG00000189292.15	459.653	-1.49697	0.277391	-5.3966	6.79e-08	1.61e-06	FAM150B
ENSG00000189367.14	68.7511	-1.46835	0.235199	-6.24302	4.29e-10	1.64e-08	KIAA0408
ENSG00000189398.5	15.6033	-1.43414	0.324622	-4.41789	9.97e-06	0.000133496	OR7E12P
ENSG00000189419.6	27.4774	-1.14156	0.185155	-6.16541	7.03e-10	2.58e-08	SPATA41
ENSG00000196091.12	18.7362	-3.28277	0.36271	-9.05068	1.42e-19	2.74e-17	MYBPC1
ENSG00000196104.10	171.222	-1.20624	0.281091	-4.2913	1.78e-05	0.000219933	SPOCK3
ENSG00000196123.12	1964.34	-1.728	0.197229	-8.7614	1.93e-18	3.13e-16	KIAA0895L
ENSG00000196208.13	9234.11	-1.57796	0.253114	-6.23418	4.54e-10	1.73e-08	GREB1
ENSG00000196263.7	685.694	-1.26611	0.177379	-7.13789	9.48e-13	5.98e-11	ZNF471
ENSG00000196344.11	1.30397	-1.1557	0.418915	-2.75878	0.00580171	0.0259575	ADH7
ENSG00000196368.4	161.899	-1.00851	0.210209	-4.79767	1.61e-06	2.69e-05	NUDT11
ENSG00000196381.10	87.9786	-1.21207	0.191289	-6.33629	2.35e-10	9.53e-09	ZNF781
ENSG00000196440.11	1042.14	-2.01601	0.203357	-9.91363	3.63e-23	1.03e-20	ARMCX4
ENSG00000196557.10	4066.87	-3.20264	0.278094	-11.5164	1.09e-30	8.86e-28	CACNA1H
ENSG00000196565.12	10.7744	-1.1935	0.253653	-4.70525	2.54e-06	4.02e-05	HBG2
ENSG00000196569.11	3401.78	-2.78267	0.272525	-10.2107	1.78e-24	6.18e-22	LAMA2
ENSG00000196616.12	2940.95	-3.84018	0.362535	-10.5926	3.23e-26	1.43e-23	ADH1B
ENSG00000196660.10	23.9035	-2.14622	0.313454	-6.847	7.54e-12	4.05e-10	SLC30A10
ENSG00000196739.14	2383.25	-1.22244	0.197143	-6.20078	5.62e-10	2.11e-08	COL27A1
ENSG00000196767.6	3.15674	-2.40192	0.596111	-4.02932	5.59e-05	0.00058567	POU3F4
ENSG00000196796.5	5.53996	-1.51335	0.353763	-4.27788	1.89e-05	0.000230886	CTB-134H23.2
ENSG00000196805.7	6.47233	-3.64235	0.514419	-7.08051	1.44e-12	8.75e-11	SPRR2B
ENSG00000196970.8	2.25331	-1.65484	0.42189	-3.92246	8.77e-05	0.000857981	NXF4
ENSG00000197046.11	93.7715	1.33029	0.251011	5.29974	1.16e-07	2.59e-06	SIGLEC15
ENSG00000197083.11	260.781	-2.06478	0.262245	-7.87349	3.45e-15	3.28e-13	ZNF300P1
ENSG00000197181.11	60.8002	-1.40772	0.2178	-6.46335	1.02e-10	4.49e-09	PIWIL2
ENSG00000197320.5	14.5048	1.09486	0.288251	3.79827	0.000145711	0.00130936	AC060834.2
ENSG00000197376.2	7.24588	-2.80117	0.406748	-6.88673	5.71e-12	3.15e-10	OR8S1
ENSG00000197406.7	203.064	-2.17312	0.300024	-7.24317	4.38e-13	2.94e-11	DIO3
ENSG00000197442.9	2003.88	-1.87361	0.207174	-9.04366	1.52e-19	2.9e-17	MAP3K5
ENSG00000197446.8	26.0496	-1.29532	0.313467	-4.13223	3.59e-05	0.000405418	CYP2F1
ENSG00000197561.6	3.32254	-1.38711	0.328142	-4.22715	2.37e-05	0.000283359	ELANE
ENSG00000197565.15	472.771	-1.838	0.235126	-7.81708	5.41e-15	4.93e-13	COL4A6
ENSG00000197641.11	2.0424	-2.91203	0.597946	-4.87006	1.12e-06	1.95e-05	SERPINB13
ENSG00000197776.7	243.518	-1.07406	0.160173	-6.7056	2.01e-11	9.89e-10	KLHDC1
ENSG00000197815.4	49.0383	-1.37183	0.195197	-7.02794	2.1e-12	1.25e-10	RP1-253P7.4
ENSG00000197888.2	39.3733	-1.00798	0.381901	-2.63938	0.00830586	0.0343878	UGT2B17
ENSG00000197891.11	0.655772	-1.54872	0.546471	-2.83404	0.00459636	0.0216168	SLC22A12
ENSG00000198010.11	11.9377	-1.21809	0.237364	-5.13175	2.87e-07	5.87e-06	DLGAP2
ENSG00000198033.11	1.13687	-2.74325	0.624779	-4.39075	1.13e-05	0.000148713	TUBA3C
ENSG00000198077.10	6.88705	-2.3149	0.356995	-6.48441	8.91e-11	3.94e-09	CYP2A7
ENSG00000198099.8	4.22381	-2.00837	0.37535	-5.35065	8.76e-08	2.01e-06	ADH4
ENSG00000198106.8	122.241	-1.75677	0.224544	-7.82374	5.13e-15	4.71e-13	SNX29P2
ENSG00000198300.12	7094.15	-3.00616	0.320324	-9.38476	6.31e-21	1.4e-18	PEG3
ENSG00000198358.4	2.07999	-2.48934	0.572522	-4.34802	1.37e-05	0.000175895	RP11-544M22.1
ENSG00000198523.5	226.979	-1.70456	0.273145	-6.24047	4.36e-10	1.67e-08	PLN
ENSG00000198626.15	410.169	-1.32878	0.223289	-5.95098	2.67e-09	8.65e-08	RYR2
ENSG00000198739.10	18.7805	-2.10355	0.407771	-5.15866	2.49e-07	5.14e-06	LRRTM3
ENSG00000198758.10	4.57023	-1.0765	0.409979	-2.62575	0.00864583	0.0355724	EPS8L3
ENSG00000198798.5	1.90918	2.01846	0.541151	3.72995	0.00019152	0.00165098	MAGEB3
ENSG00000198829.6	79.6905	1.09168	0.205508	5.31211	1.08e-07	2.44e-06	SUCNR1
ENSG00000198838.11	89.223	-1.06441	0.202196	-5.26424	1.41e-07	3.08e-06	RYR3
ENSG00000198848.12	379.684	-1.10389	0.248391	-4.44415	8.82e-06	0.000120622	CES1
ENSG00000198865.9	433.262	-1.35764	0.167098	-8.12478	4.48e-16	5.11e-14	CCDC152
ENSG00000198873.11	751.796	-1.80295	0.210464	-8.56655	1.07e-17	1.56e-15	GRK5
ENSG00000198932.12	2012.01	-3.70986	0.279942	-13.2523	4.38e-40	1.5e-36	GPRASP1
ENSG00000201558.1	2.37344	-1.57093	0.349562	-4.494	6.99e-06	9.84e-05	RNVU1-6
ENSG00000201998.1	7.32006	-1.24779	0.31219	-3.99689	6.42e-05	0.00066042	SNORA23
ENSG00000203527.2	1.44418	-1.8301	0.45917	-3.98567	6.73e-05	0.0006868	Z99756.1
ENSG00000203685.9	241.927	-1.06144	0.215719	-4.92047	8.63e-07	1.55e-05	C1orf95
ENSG00000203709.9	499.253	-1.03567	0.188261	-5.50125	3.77e-08	9.49e-07	C1orf132
ENSG00000203785.8	6.70984	-2.68581	0.490235	-5.47862	4.29e-08	1.07e-06	SPRR2E
ENSG00000203786.6	0.994014	-1.82733	0.565485	-3.23143	0.00123174	0.00756358	KPRP
ENSG00000203801.8	7.41345	-1.27355	0.260544	-4.88805	1.02e-06	1.79e-05	LINC00222
ENSG00000203814.6	590.282	-1.31932	0.19012	-6.93942	3.94e-12	2.23e-10	HIST2H2BF
ENSG00000203818.7	9.17423	-1.37777	0.351131	-3.9238	8.72e-05	0.000854118	HIST2H3PS2
ENSG00000203867.7	173.553	-1.73397	0.233734	-7.41857	1.18e-13	8.54e-12	RBM20
ENSG00000203900.2	1.91183	-1.35164	0.515074	-2.62416	0.00868633	0.0356987	RP11-261N11.8
ENSG00000203909.3	1.32888	-1.74586	0.637349	-2.73925	0.00615793	0.0271942	DPPA5
ENSG00000203963.11	7.03922	-1.55303	0.328746	-4.72411	2.31e-06	3.71e-05	C1orf141
ENSG00000204001.9	23.34	1.32862	0.325159	4.08608	4.39e-05	0.000476908	LCN8
ENSG00000204071.9	52.4346	-4.83061	0.441104	-10.9512	6.56e-28	3.5e-25	TCEAL6
ENSG00000204072.3	157.612	-1.39166	0.358111	-3.88612	0.00010186	0.000968919	ARMCX7P
ENSG00000204092.2	0.703998	-1.47964	0.527099	-2.80714	0.00499834	0.023109	LINC00951
ENSG00000204121.2	3.79457	1.28436	0.402118	3.19399	0.00140323	0.00839383	ECEL1P1
ENSG00000204186.7	765.856	-1.48224	0.250062	-5.92751	3.08e-09	9.8e-08	ZDBF2
ENSG00000204241.7	25.1304	-1.00895	0.214561	-4.70238	2.57e-06	4.07e-05	RP11-713P17.3
ENSG00000204278.12	1.06712	-1.32521	0.448838	-2.95254	0.0031517	0.0160196	TMEM235
ENSG00000204314.10	743.317	-1.07197	0.185017	-5.79392	6.88e-09	2.04e-07	PRRT1
ENSG00000204338.8	120.668	-1.01585	0.227894	-4.45755	8.29e-06	0.000114145	CYP21A1P
ENSG00000204379.10	8.63723	-2.56131	0.805853	-3.17839	0.00148097	0.00876428	XAGE1A
ENSG00000204382.11	17.9242	-1.91191	0.747271	-2.55853	0.0105116	0.0414715	XAGE1B
ENSG00000204403.9	36.4898	-3.1843	0.307938	-10.3407	4.61e-25	1.71e-22	CASP12
ENSG00000204434.5	1.68019	1.3558	0.445708	3.04189	0.00235094	0.0126687	POTEKP
ENSG00000204542.2	184.992	1.36237	0.357032	3.81583	0.000135726	0.00123066	C6orf15
ENSG00000204677.10	36.9759	-1.45056	0.252091	-5.7541	8.71e-09	2.51e-07	FAM153C
ENSG00000204681.10	2818.38	-1.45025	0.214681	-6.75536	1.42e-11	7.32e-10	GABBR1
ENSG00000204706.14	34.8447	-1.05057	0.162004	-6.48485	8.88e-11	3.93e-09	MAMDC2-AS1
ENSG00000204832.9	2.22626	-1.19297	0.427621	-2.78977	0.00527447	0.0240628	ST8SIA6-AS1
ENSG00000204876.4	3.51252	1.58863	0.335278	4.73825	2.16e-06	3.49e-05	AC021218.2
ENSG00000204936.9	48.4246	-1.23633	0.269361	-4.58987	4.44e-06	6.6e-05	CD177
ENSG00000205090.8	89.4207	-1.11646	0.177247	-6.29888	3e-10	1.19e-08	TMEM240
ENSG00000205176.3	2.3596	-1.56495	0.37859	-4.13362	3.57e-05	0.000403485	REXO1L1P
ENSG00000205221.12	297.792	-3.44459	0.362823	-9.49386	2.23e-21	5.27e-19	VIT
ENSG00000205363.5	300.75	-1.26443	0.238404	-5.30375	1.13e-07	2.54e-06	C15orf59
ENSG00000205562.2	17.7527	-1.42942	0.258741	-5.52451	3.3e-08	8.41e-07	RP11-497E19.1
ENSG00000205683.11	372.933	-1.2272	0.216198	-5.67629	1.38e-08	3.82e-07	DPF3
ENSG00000205777.17	39.5872	-2.78317	0.843846	-3.29819	0.000973088	0.00626401	GAGE1
ENSG00000205786.8	1.4755	2.23146	0.373757	5.97035	2.37e-09	7.82e-08	LINC01531
ENSG00000205856.3	0.680728	-1.19402	0.420793	-2.83754	0.00454627	0.0214374	C22orf42
ENSG00000205922.4	5.1122	-2.50887	0.518982	-4.83422	1.34e-06	2.28e-05	ONECUT3
ENSG00000205923.3	71.0852	-1.68543	0.249445	-6.75673	1.41e-11	7.26e-10	CEMP1
ENSG00000205929.9	118.118	-2.7121	0.328003	-8.26851	1.36e-16	1.66e-14	C21orf62
ENSG00000205959.3	106.081	-2.21918	0.244989	-9.05826	1.33e-19	2.58e-17	RP11-689P11.2
ENSG00000206047.2	2.85964	-1.62249	0.386534	-4.19754	2.7e-05	0.000316397	DEFA1
ENSG00000206127.10	26.2579	-1.77656	0.353187	-5.0301	4.9e-07	9.33e-06	GOLGA8O
ENSG00000206172.8	1578.08	-1.20267	0.210791	-5.70554	1.16e-08	3.26e-07	HBA1
ENSG00000206177.6	1.75397	-2.42509	0.451597	-5.37002	7.87e-08	1.83e-06	HBM
ENSG00000206203.4	1.59789	-2.61075	0.874524	-2.98534	0.00283264	0.0147091	TSSK2
ENSG00000206260.3	0.662492	-1.69354	0.598834	-2.82807	0.00468301	0.0219275	PRR23A
ENSG00000206262.8	1230.53	-3.26064	0.380767	-8.56333	1.1e-17	1.59e-15	FOXL2NB
ENSG00000206585.1	839.746	-1.40965	0.401071	-3.51472	0.000440223	0.00329591	RNVU1-7
ENSG00000206588.1	625.887	-1.0888	0.305163	-3.56793	0.000359814	0.00279581	RNU1-28P
ENSG00000206596.1	643.751	-1.05833	0.305079	-3.46905	0.000522308	0.00378599	RNU1-27P
ENSG00000206652.1	625.887	-1.0888	0.305163	-3.56793	0.000359814	0.00279581	RNU1-1
ENSG00000206737.1	625.887	-1.0888	0.305163	-3.56793	0.000359814	0.00279581	RNVU1-18
ENSG00000206760.1	9.36155	-1.16608	0.451176	-2.58453	0.00975126	0.0390956	SNORA6
ENSG00000207005.1	643.751	-1.05833	0.305079	-3.46905	0.000522308	0.00378599	RNU1-2
ENSG00000207165.1	2.95187	-1.69626	0.498618	-3.40192	0.000669143	0.00464965	SNORA70
ENSG00000207389.1	643.751	-1.05833	0.305079	-3.46905	0.000522308	0.00378599	RNU1-4
ENSG00000207513.1	625.887	-1.0888	0.305163	-3.56793	0.000359814	0.00279581	RNU1-3
ENSG00000211598.2	3020.42	1.25803	0.35687	3.52519	0.000423181	0.00318937	IGKV4-1
ENSG00000211599.2	16.4031	1.84083	0.449415	4.09606	4.2e-05	0.000460196	IGKV5-2
ENSG00000211625.2	53.4848	1.10136	0.404914	2.71999	0.00652838	0.0284551	IGKV3D-20
ENSG00000211639.2	18.373	3.49024	0.443006	7.87853	3.31e-15	3.16e-13	IGLV4-60
ENSG00000211653.2	1450.49	1.21643	0.361129	3.36841	0.000756031	0.00513315	IGLV1-40
ENSG00000211658.2	47.2159	1.84577	0.419443	4.40053	1.08e-05	0.000142995	IGLV3-27
ENSG00000211663.2	853.204	1.51973	0.372747	4.07711	4.56e-05	0.000492856	IGLV3-19
ENSG00000211666.2	1657.13	1.28635	0.34298	3.75051	0.000176476	0.00153958	IGLV2-14
ENSG00000211670.2	78.247	1.07014	0.427356	2.50409	0.0122767	0.0466891	IGLV3-9
ENSG00000211683.3	8.49626	-1.82371	0.305036	-5.97869	2.25e-09	7.46e-08	KB-1572G7.3
ENSG00000211696.2	0.815137	1.14632	0.353426	3.24344	0.00118096	0.00731102	TRGV8
ENSG00000211710.3	5.50865	1.3488	0.277764	4.85591	1.2e-06	2.07e-05	TRBV4-1
ENSG00000211724.3	3.10413	1.14017	0.259063	4.40114	1.08e-05	0.000142706	TRBV6-6
ENSG00000211777.2	3.86337	1.00613	0.257447	3.90812	9.3e-05	0.000900122	TRAV3
ENSG00000211779.3	1.4327	1.0557	0.296518	3.56032	0.000370404	0.00286259	TRAV5
ENSG00000211782.2	1.12971	1.11444	0.303563	3.67122	0.000241397	0.00200007	TRAV8-1
ENSG00000211787.1	1.95042	1.71634	0.287606	5.96769	2.41e-09	7.92e-08	TRAV8-3
ENSG00000211795.3	3.92171	1.14986	0.24998	4.59978	4.23e-06	6.33e-05	TRAV8-6
ENSG00000211804.3	1.7442	1.0142	0.336038	3.0181	0.00254362	0.0134792	TRDV1
ENSG00000211896.6	114069	1.00543	0.330434	3.04276	0.00234423	0.0126445	IGHG1
ENSG00000211933.2	75.5536	1.72663	0.412822	4.18251	2.88e-05	0.000335047	IGHV6-1
ENSG00000211938.2	432.086	2.04194	0.381135	5.35754	8.44e-08	1.95e-06	IGHV3-7
ENSG00000211941.3	321.484	2.09417	0.379104	5.524	3.31e-08	8.43e-07	IGHV3-11
ENSG00000211943.2	365.397	1.1934	0.370645	3.21978	0.00128289	0.00780618	IGHV3-15
ENSG00000211947.2	854.675	1.64969	0.38392	4.29695	1.73e-05	0.000215264	IGHV3-21
ENSG00000211949.3	1338.98	1.00744	0.35593	2.83044	0.00464837	0.0218042	IGHV3-23
ENSG00000211952.3	88.5336	1.60294	0.431295	3.71658	0.000201938	0.00172553	IGHV4-28
ENSG00000211955.2	803.029	1.61609	0.384323	4.20503	2.61e-05	0.000308005	IGHV3-33
ENSG00000211959.2	924.931	1.30238	0.374749	3.47534	0.000510211	0.00371084	IGHV4-39
ENSG00000211964.3	135.575	1.77018	0.445956	3.96941	7.21e-05	0.000726915	IGHV3-48
ENSG00000211965.3	157.201	1.30522	0.407754	3.20101	0.00136948	0.00822578	IGHV3-49
ENSG00000211967.3	53.7319	1.33898	0.394241	3.39635	0.000682911	0.00472319	IGHV3-53
ENSG00000211968.3	30.3102	1.98498	0.510286	3.88993	0.000100272	0.000957251	IGHV1-58
ENSG00000211970.3	327.567	1.97477	0.37808	5.22316	1.76e-07	3.77e-06	IGHV4-61
ENSG00000211972.2	26.6419	1.13517	0.391202	2.90175	0.00371085	0.0182446	IGHV3-66
ENSG00000212124.2	10.0758	-1.09375	0.23059	-4.74326	2.1e-06	3.42e-05	TAS2R19
ENSG00000212195.2	0.766696	-1.52243	0.402465	-3.78275	0.000155104	0.00137887	U3
ENSG00000212232.1	156.765	-1.30825	0.265648	-4.92474	8.45e-07	1.52e-05	SNORD17
ENSG00000212402.1	16.6957	-1.06263	0.318425	-3.33714	0.00084644	0.00561621	SNORA74B
ENSG00000213073.4	95.0764	-1.07269	0.181727	-5.90278	3.57e-09	1.12e-07	RP11-288H12.3
ENSG00000213077.5	21.5035	-2.44343	0.299971	-8.14557	3.78e-16	4.38e-14	FAM106A
ENSG00000213088.9	336.864	-1.20838	0.219013	-5.5174	3.44e-08	8.74e-07	ACKR1
ENSG00000213121.2	2.25644	-1.7816	0.352217	-5.05824	4.23e-07	8.18e-06	RP11-306O13.1
ENSG00000213213.13	122.245	-1.5537	0.18213	-8.53073	1.45e-17	2.08e-15	CCDC183
ENSG00000213225.7	48.1712	-1.04783	0.264286	-3.96477	7.35e-05	0.000739687	AC018804.7
ENSG00000213231.12	4.27748	-1.50884	0.460131	-3.27914	0.00104123	0.00661202	TCL1B
ENSG00000213244.3	11.7663	-1.87035	0.317226	-5.89597	3.72e-09	1.16e-07	HIST2H3DP1
ENSG00000213366.12	5756.71	-1.52506	0.194327	-7.8479	4.23e-15	3.93e-13	GSTM2
ENSG00000213398.7	398.678	-1.03095	0.148307	-6.95144	3.62e-12	2.07e-10	LCAT
ENSG00000213399.3	87.5205	-1.13933	0.190909	-5.96792	2.4e-09	7.92e-08	AC022210.2
ENSG00000213435.3	2.94864	-1.28405	0.292768	-4.38591	1.16e-05	0.000151418	ATP6V0CP3
ENSG00000213519.2	1.59017	-1.14223	0.353738	-3.22903	0.0012421	0.00760532	AC132008.1
ENSG00000213757.3	12.9783	-1.00824	0.152123	-6.62779	3.41e-11	1.63e-09	CTC-451P13.1
ENSG00000213777.5	8.60787	-1.63205	0.237906	-6.86006	6.88e-12	3.74e-10	CTD-2224J9.8
ENSG00000213864.3	0.512778	-1.02449	0.316066	-3.24137	0.00118955	0.00735155	EEF1B2P2
ENSG00000213886.3	952.786	1.01087	0.289075	3.49693	0.000470643	0.00347567	UBD
ENSG00000214016.3	13.5104	-1.79396	0.237431	-7.55567	4.17e-14	3.28e-12	RP6-105D16.1
ENSG00000214021.15	3648.3	-1.5338	0.192234	-7.97883	1.48e-15	1.54e-13	TTLL3
ENSG00000214043.7	1.83033	1.25587	0.395252	3.17738	0.00148612	0.00879169	RP5-944M2.3
ENSG00000214107.7	3.14392	-1.68821	0.662168	-2.54951	0.0107873	0.0423	MAGEB1
ENSG00000214140.10	57.53	-1.31016	0.198214	-6.6098	3.85e-11	1.82e-09	PRCD
ENSG00000214274.9	491.29	-1.38477	0.18379	-7.53452	4.9e-14	3.79e-12	ANG
ENSG00000214295.4	1.36774	1.04931	0.405375	2.58849	0.00963965	0.0387483	FOXO1B
ENSG00000214456.8	1457.77	-4.02444	0.295866	-13.6022	3.88e-42	1.89e-38	PLIN5
ENSG00000214457.3	0.841037	-1.67615	0.603645	-2.77671	0.00549116	0.0248355	RPL7P29
ENSG00000214510.9	3.94959	-1.46531	0.301329	-4.86284	1.16e-06	2.01e-05	SPINK13
ENSG00000214548.14	35661.5	-4.65617	0.330821	-14.0746	5.44e-45	3.09e-41	MEG3
ENSG00000214575.9	202.625	-1.37978	0.238457	-5.78628	7.2e-09	2.11e-07	CPEB1
ENSG00000214617.9	355.05	1.03411	0.411592	2.51247	0.0119888	0.0458516	SLC6A10P
ENSG00000214897.4	58.6891	-1.14945	0.259931	-4.42214	9.77e-06	0.000131453	U82695.5
ENSG00000214940.8	217.089	-1.77568	0.316807	-5.60494	2.08e-08	5.58e-07	NPIPA8
ENSG00000214988.4	2.1071	-1.0741	0.329252	-3.26224	0.00110535	0.00693738	RPL7AP26
ENSG00000215115.6	23.2768	-1.19099	0.287338	-4.14491	3.4e-05	0.000386636	CXorf49
ENSG00000215182.8	88.4958	1.78556	0.326225	5.4734	4.41e-08	1.1e-06	MUC5AC
ENSG00000215252.11	4984.87	-1.59442	0.214804	-7.42266	1.15e-13	8.3e-12	GOLGA8B
ENSG00000215274.5	1.64038	-1.61786	0.359048	-4.50596	6.61e-06	9.37e-05	GAGE10
ENSG00000215478.8	59.5491	-2.1685	0.316389	-6.85391	7.19e-12	3.89e-10	CES5AP1
ENSG00000215483.8	5.18036	-1.0641	0.258635	-4.11432	3.88e-05	0.000432604	LINC00598
ENSG00000215704.9	2.73786	-1.76797	0.426453	-4.14575	3.39e-05	0.000385377	CELA2B
ENSG00000216624.2	3.39731	-2.2368	0.29718	-7.52676	5.2e-14	3.99e-12	GAPDHP72
ENSG00000216649.3	3.94406	-4.7272	1.36483	-3.46359	0.000533024	0.00384804	GAGE12E
ENSG00000216921.7	3.97914	-1.42629	0.320982	-4.44352	8.85e-06	0.000120895	AC131097.4
ENSG00000217767.2	0.922925	-1.11022	0.325911	-3.4065	0.000658019	0.0045845	RP11-160A9.2
ENSG00000217862.2	0.970822	1.3422	0.274236	4.89434	9.86e-07	1.75e-05	HIST1H4PS1
ENSG00000218632.3	1.05775	1.12422	0.313712	3.5836	0.000338885	0.00265985	RPL7P28
ENSG00000218819.4	1.0897	-1.68507	0.608971	-2.76708	0.00565603	0.0254227	TDRD15
ENSG00000219073.7	8.82692	-3.26759	0.412856	-7.9146	2.48e-15	2.45e-13	CELA3B
ENSG00000219085.1	2.74404	-1.03334	0.266791	-3.87324	0.0001074	0.00101258	NPM1P37
ENSG00000219410.5	565.286	-1.31851	0.207837	-6.34396	2.24e-10	9.16e-09	RP4-761J14.8
ENSG00000220267.1	4.06852	-1.7343	0.641696	-2.70267	0.00687846	0.0296701	ACTBP8
ENSG00000220378.3	1.37797	-1.80409	0.39014	-4.6242	3.76e-06	5.74e-05	KRT8P42
ENSG00000220563.1	36.5513	-1.38712	0.192623	-7.20123	5.97e-13	3.89e-11	PKMP3
ENSG00000220702.1	0.676209	-1.16123	0.463151	-2.50724	0.0121679	0.0463597	RP1-32I10.10
ENSG00000220785.7	751.334	-2.44153	0.234433	-10.4146	2.13e-25	8.43e-23	MTMR9LP
ENSG00000220884.2	4.44982	-2.40553	0.353311	-6.80853	9.86e-12	5.21e-10	MESTP1
ENSG00000221125.2	9.21089	-2.42438	0.383987	-6.31369	2.72e-10	1.09e-08	U3
ENSG00000221970.1	7.72764	-1.24518	0.244608	-5.09049	3.57e-07	7.09e-06	OR2A1
ENSG00000222012.1	17.8928	-1.52669	0.300182	-5.08587	3.66e-07	7.25e-06	AC005481.5
ENSG00000222489.1	5.96413	-1.38683	0.375317	-3.6951	0.000219799	0.00185538	SNORA79
ENSG00000222724.1	1.32158	-1.17002	0.304199	-3.84624	0.000119945	0.00110819	RNU2-63P
ENSG00000223039.1	1.61265	-1.11643	0.406283	-2.74792	0.00599744	0.0266726	RN7SKP268
ENSG00000223117.1	1.81389	1.04856	0.233204	4.49631	6.91e-06	9.75e-05	RN7SKP296
ENSG00000223345.3	17.0508	-2.15822	0.320904	-6.72543	1.75e-11	8.77e-10	HIST2H2BA
ENSG00000223403.3	234.868	-3.9245	0.32545	-12.0587	1.75e-33	2.2e-30	MEG9
ENSG00000223414.2	501.892	-6.1241	0.452783	-13.5254	1.11e-41	4.72e-38	LINC00473
ENSG00000223431.1	0.976366	-1.0111	0.355615	-2.84326	0.00446552	0.0211179	MTND6P21
ENSG00000223542.1	7.65057	-1.70693	0.30434	-5.60863	2.04e-08	5.48e-07	RP1-283K11.3
ENSG00000223561.6	31.2331	-2.90575	0.346746	-8.38005	5.29e-17	6.99e-15	AC003090.1
ENSG00000223611.5	3.00957	-2.01101	0.398024	-5.05249	4.36e-07	8.38e-06	SUPT20HL2
ENSG00000223648.3	14.0615	1.61332	0.466377	3.45926	0.000541672	0.00390056	IGHV3-64
ENSG00000223731.2	4.06638	-3.42579	0.555984	-6.16167	7.2e-10	2.62e-08	SUPT20HL1
ENSG00000223749.7	312.973	-1.94171	0.253098	-7.67178	1.7e-14	1.45e-12	MIR503HG
ENSG00000223774.5	4.5707	-1.3638	0.327851	-4.15981	3.19e-05	0.000364956	RP11-307B6.3
ENSG00000223806.7	0.853947	-1.78162	0.457315	-3.89584	9.79e-05	0.000938469	LINC00114
ENSG00000223812.5	21.4051	-1.63086	0.431309	-3.78119	0.000156079	0.0013861	RP11-197K6.1
ENSG00000223842.1	2.01352	-1.39731	0.325469	-4.29322	1.76e-05	0.000218512	RP11-135J2.3
ENSG00000223893.1	1.27287	-2.22082	0.533153	-4.16544	3.11e-05	0.000357503	GNL2P1
ENSG00000223975.1	1.37802	-2.12803	0.449487	-4.73434	2.2e-06	3.55e-05	AP001048.4
ENSG00000224057.1	5.63919	-1.7777	0.311009	-5.71592	1.09e-08	3.09e-07	EGFR-AS1
ENSG00000224153.2	1.79801	-1.89145	0.440815	-4.2908	1.78e-05	0.000220351	RP11-433C9.2
ENSG00000224220.1	0.895732	1.06776	0.354192	3.01463	0.00257293	0.0136091	AC104699.1
ENSG00000224331.2	1.64118	-1.6026	0.379411	-4.22393	2.4e-05	0.000287248	AC019181.3
ENSG00000224407.1	4.65078	-3.20321	1.04915	-3.05314	0.00226461	0.0123046	RP5-956O18.3
ENSG00000224413.1	40.123	-1.35482	0.30013	-4.51412	6.36e-06	9.06e-05	AP001476.2
ENSG00000224458.3	1.33229	-1.35984	0.462055	-2.94303	0.00325018	0.0164247	GUSBP6
ENSG00000224505.2	34.8066	-2.73578	0.446278	-6.13021	8.78e-10	3.14e-08	AC002117.1
ENSG00000224645.1	32.1083	-3.10021	0.722713	-4.28968	1.79e-05	0.00022114	RP11-126K1.8
ENSG00000224660.1	1268.92	-1.31423	0.187493	-7.0095	2.39e-12	1.41e-10	SH3BP5-AS1
ENSG00000224712.10	217.026	-1.19665	0.149513	-8.00366	1.21e-15	1.28e-13	NPIPA3
ENSG00000224713.4	119.543	-1.82786	0.255681	-7.14898	8.74e-13	5.55e-11	AC025165.8
ENSG00000224729.5	49.7504	-1.10514	0.189857	-5.82089	5.85e-09	1.75e-07	PCOLCE-AS1
ENSG00000224743.6	4.4899	-1.30375	0.279345	-4.66715	3.05e-06	4.75e-05	TEX26-AS1
ENSG00000224747.1	2.61682	-1.3203	0.332	-3.97682	6.98e-05	0.000708642	AP001065.7
ENSG00000224758.1	2.25777	-1.02554	0.329045	-3.11673	0.00182872	0.0103586	LINC01167
ENSG00000224846.2	4.38115	-1.40866	0.39978	-3.52357	0.000425769	0.00320605	RP1-90J20.8
ENSG00000224858.5	25.4459	-1.39215	0.184516	-7.54489	4.53e-14	3.52e-12	RPL29P11
ENSG00000224871.1	1.70489	-1.40283	0.448512	-3.12775	0.00176148	0.0100646	XX-FW81066F1.2
ENSG00000224999.1	1.23151	-1.87753	0.506049	-3.71017	0.000207121	0.00176407	VTA1P1
ENSG00000225032.5	458.136	-1.81072	0.218209	-8.29811	1.06e-16	1.32e-14	RP11-228B15.4
ENSG00000225138.7	734.555	-1.43783	0.184544	-7.79124	6.64e-15	5.94e-13	CTD-2228K2.7
ENSG00000225194.2	48.0974	-1.79704	0.248358	-7.23567	4.63e-13	3.08e-11	LINC00092
ENSG00000225206.5	3.12103	-2.66001	0.479824	-5.54372	2.96e-08	7.63e-07	MIR137HG
ENSG00000225261.1	3.42001	-1.04444	0.285578	-3.6573	0.000254888	0.00209153	RP5-937E21.8
ENSG00000225333.6	0.871983	-2.18873	0.608761	-3.59538	0.000323912	0.00256283	RP1-144F13.4
ENSG00000225366.4	3.885	-1.49338	0.426126	-3.50456	0.000457365	0.00339807	TDGF1P3
ENSG00000225399.4	23.8264	-1.41342	0.221082	-6.39319	1.62e-10	6.86e-09	RP11-3B7.1
ENSG00000225472.1	10.6942	-1.46081	0.270314	-5.40411	6.51e-08	1.55e-06	RP11-120J1.1
ENSG00000225511.6	18.1068	-1.82931	0.235171	-7.77865	7.33e-15	6.51e-13	LINC00475
ENSG00000225546.5	2.24891	-1.64958	0.506237	-3.25851	0.00111998	0.00700601	RP11-328J2.1
ENSG00000225649.5	21.8744	-2.35676	0.296862	-7.93893	2.04e-15	2.07e-13	AC064875.2
ENSG00000225655.5	3.55494	-1.57048	0.358623	-4.37919	1.19e-05	0.000155443	PGM5-AS1
ENSG00000225670.4	38.3401	-1.03437	0.281145	-3.67912	0.000234041	0.00195288	CADM3-AS1
ENSG00000225698.3	22.3977	1.33917	0.330955	4.04639	5.2e-05	0.000550836	IGHV3-72
ENSG00000225706.1	72.4414	-2.21854	0.289756	-7.65657	1.91e-14	1.62e-12	PTPRD-AS1
ENSG00000225746.8	26.4589	-2.87812	0.338128	-8.51193	1.71e-17	2.4e-15	SNHG23
ENSG00000225756.1	52.9772	-1.01798	0.209448	-4.8603	1.17e-06	2.03e-05	DBH-AS1
ENSG00000225815.2	1.23067	1.02019	0.378916	2.6924	0.00709406	0.0303468	AC092669.6
ENSG00000225873.1	4.64038	-1.4909	0.285617	-5.21993	1.79e-07	3.83e-06	LINC00694
ENSG00000225880.5	95.4473	-1.36917	0.1714	-7.98812	1.37e-15	1.43e-13	LINC00115
ENSG00000225920.2	8.21903	-1.40192	0.286972	-4.88523	1.03e-06	1.81e-05	RIMKLBP2
ENSG00000225930.3	7.97013	-1.28275	0.309913	-4.13906	3.49e-05	0.000394675	DKFZP434L187
ENSG00000225936.1	0.742735	-1.39394	0.492806	-2.82858	0.00467551	0.0219044	RP11-501J20.5
ENSG00000226010.1	1.14569	-1.5034	0.412786	-3.64207	0.000270457	0.0022018	RP11-403E24.1
ENSG00000226017.2	1.39874	-1.03386	0.302994	-3.41214	0.000644558	0.00450913	PRICKLE2-AS3
ENSG00000226031.5	5.72543	-1.02427	0.244897	-4.18245	2.88e-05	0.000335047	FGF13-AS1
ENSG00000226084.5	385.439	-1.24357	0.157966	-7.87239	3.48e-15	3.3e-13	RP4-706A16.3
ENSG00000226101.1	1.08773	1.00604	0.305722	3.2907	0.000999393	0.00640073	AC007461.2
ENSG00000226143.1	0.91993	-1.96833	0.774133	-2.54262	0.0110024	0.0429116	RP1-138B7.5
ENSG00000226179.5	16.7965	-1.01944	0.166968	-6.10561	1.02e-09	3.62e-08	LINC00685
ENSG00000226199.1	1.68717	-2.70364	0.548907	-4.9255	8.41e-07	1.52e-05	RP11-12D5.2
ENSG00000226235.1	269.169	-2.68858	0.271484	-9.90329	4.03e-23	1.14e-20	LEMD1-AS1
ENSG00000226245.1	9.926	-1.10155	0.227958	-4.83226	1.35e-06	2.3e-05	ZNF32-AS1
ENSG00000226252.1	6.26739	-1.78545	0.308751	-5.78284	7.35e-09	2.15e-07	RP1-18D14.7
ENSG00000226396.1	42.1739	-1.05984	0.209665	-5.05492	4.31e-07	8.3e-06	RP5-1056L3.3
ENSG00000226413.2	8.27685	-1.00263	0.220976	-4.53726	5.7e-06	8.24e-05	OR8T1P
ENSG00000226491.1	10.9107	-1.02213	0.217658	-4.69604	2.65e-06	4.19e-05	FTOP1
ENSG00000226516.7	5.70522	-2.13217	0.479226	-4.4492	8.62e-06	0.000118029	FAM138B
ENSG00000226571.1	1.18986	-1.0603	0.376116	-2.81908	0.00481614	0.0224277	RP11-445F6.2
ENSG00000226622.5	15.0116	-5.38258	0.585117	-9.19915	3.61e-20	7.46e-18	AC092155.4
ENSG00000226636.1	1.76107	-1.22841	0.334817	-3.66889	0.000243602	0.00201491	RP5-1049N15.2
ENSG00000226648.1	16.722	-1.11348	0.186735	-5.96287	2.48e-09	8.14e-08	PLCG1-AS1
ENSG00000226819.1	8.61252	1.14787	0.225832	5.08286	3.72e-07	7.35e-06	MEIS1-AS3
ENSG00000226840.1	0.518553	1.02886	0.380326	2.70522	0.006826	0.0294699	PAICSP3
ENSG00000226891.6	44.3512	-1.26036	0.210673	-5.98256	2.2e-09	7.3e-08	LINC01359
ENSG00000226954.1	1.37537	-1.64001	0.474272	-3.45795	0.000544295	0.00391863	RP5-983L19.2
ENSG00000226956.1	128.638	-1.12026	0.384267	-2.91531	0.00355336	0.0176689	AP000432.2
ENSG00000227068.1	0.826154	-1.51682	0.478146	-3.17229	0.00151242	0.0089179	RP11-12A16.3
ENSG00000227135.1	5.16487	-1.23147	0.332091	-3.70823	0.000208715	0.00177499	GCSAML-AS1
ENSG00000227176.1	2.69361	-1.38982	0.328605	-4.22945	2.34e-05	0.000280877	AC092641.2
ENSG00000227245.1	1.2977	-1.38941	0.406189	-3.4206	0.000624828	0.00439092	RP11-136C24.2
ENSG00000227253.3	12.13	-1.0802	0.231012	-4.67594	2.93e-06	4.57e-05	RP11-166N17.1
ENSG00000227430.1	0.843288	1.27132	0.347639	3.65701	0.000255174	0.00209236	AC019185.2
ENSG00000227467.3	7.02439	-1.21212	0.219831	-5.51385	3.51e-08	8.91e-07	LINC01537
ENSG00000227487.3	12.3591	-2.70703	0.381636	-7.09323	1.31e-12	8.04e-11	NCAM1-AS1
ENSG00000227591.5	3.34479	-1.10374	0.261756	-4.21666	2.48e-05	0.000295109	RP1-28O10.1
ENSG00000227644.2	5.3394	-2.44883	0.433719	-5.64612	1.64e-08	4.49e-07	HIGD1AP11
ENSG00000227678.7	5.62151	-1.15034	0.205858	-5.58806	2.3e-08	6.09e-07	RP11-73O6.3
ENSG00000227706.3	41.084	1.20391	0.389606	3.09007	0.00200111	0.0111209	RP11-301G19.1
ENSG00000227744.4	2.84378	-2.44877	0.399974	-6.12233	9.22e-10	3.29e-08	FLJ43879
ENSG00000227751.1	36.1249	-4.48925	0.920181	-4.87867	1.07e-06	1.87e-05	RP1-20B21.4
ENSG00000227827.3	458.112	-1.13102	0.256728	-4.40553	1.06e-05	0.00014006	RP11-958N24.2
ENSG00000227932.1	1.76978	-2.52594	0.742868	-3.40025	0.000673242	0.00467052	RP13-16H11.2
ENSG00000227999.1	11.6454	-1.68588	0.287184	-5.87037	4.35e-09	1.34e-07	MTND5P1
ENSG00000228050.1	4.4153	-1.10512	0.421782	-2.62012	0.00878984	0.0360676	TOP3BP1
ENSG00000228069.1	2.24279	-1.73403	0.341019	-5.08484	3.68e-07	7.28e-06	RP11-100G15.3
ENSG00000228107.1	13.421	-1.1377	0.195167	-5.82935	5.56e-09	1.67e-07	AP000692.9
ENSG00000228222.1	1.2582	1.26213	0.34964	3.60979	0.000306441	0.00244801	AC074363.1
ENSG00000228242.6	123.634	-1.07798	0.136668	-7.88761	3.08e-15	2.98e-13	AC093495.4
ENSG00000228252.8	127.87	-1.63912	0.260779	-6.28549	3.27e-10	1.29e-08	COL6A4P2
ENSG00000228307.1	6.34021	1.24453	0.246959	5.03942	4.67e-07	8.92e-06	OR2S1P
ENSG00000228314.1	62.7019	-1.93809	0.2897	-6.68999	2.23e-11	1.09e-09	CYP4F29P
ENSG00000228315.11	1109.94	-1.56231	0.191811	-8.14504	3.79e-16	4.38e-14	GUSBP11
ENSG00000228331.2	0.763035	-1.19567	0.355708	-3.36137	0.000775555	0.00523964	RPL17P43
ENSG00000228363.2	18.6333	-1.01328	0.221369	-4.57732	4.71e-06	6.95e-05	AC015971.2
ENSG00000228446.2	8.33587	-1.06291	0.200357	-5.3051	1.13e-07	2.53e-06	AC073052.1
ENSG00000228485.1	1.11897	-2.19862	0.577851	-3.80482	0.000141908	0.00127991	GRK5-IT1
ENSG00000228536.1	8.54839	-1.03756	0.264026	-3.92978	8.5e-05	0.000836775	RP11-392O17.1
ENSG00000228554.1	5.50345	-1.2742	0.260965	-4.88264	1.05e-06	1.84e-05	AC004837.5
ENSG00000228630.5	4.71765	-1.72849	0.461167	-3.74809	0.000178188	0.00155174	HOTAIR
ENSG00000228643.1	9.41574	-2.72899	0.394658	-6.91482	4.68e-12	2.62e-10	AC079779.4
ENSG00000228677.1	3.31924	-1.98382	0.339643	-5.84088	5.19e-09	1.58e-07	TTC3-AS1
ENSG00000228695.9	5.21635	-1.24099	0.417777	-2.97046	0.00297357	0.0152735	CES1P1
ENSG00000228697.1	0.923931	1.02881	0.397947	2.58528	0.00972995	0.0390331	RP5-968D22.1
ENSG00000228748.2	206.93	-1.5483	0.175193	-8.83768	9.77e-19	1.68e-16	RP13-39P12.3
ENSG00000228798.1	36.758	-1.97017	0.236628	-8.32602	8.36e-17	1.06e-14	AP000473.5
ENSG00000228830.1	210.502	-2.23249	0.4702	-4.74797	2.05e-06	3.35e-05	RP4-781K5.2
ENSG00000228843.2	3.78662	-2.03836	0.612565	-3.32758	0.000876023	0.00576753	RP11-112J3.15
ENSG00000228981.3	99.3116	-1.08676	0.18517	-5.86897	4.38e-09	1.35e-07	RP11-364L4.1
ENSG00000228983.8	0.892763	-2.18059	0.599155	-3.63945	0.000273225	0.00222007	AC025627.7
ENSG00000228998.4	13.1815	1.25311	0.247756	5.05783	4.24e-07	8.2e-06	RP11-697E2.7
ENSG00000229108.1	1.44547	-1.37434	0.400365	-3.43272	0.000597549	0.00423147	MEOX2-AS1
ENSG00000229150.1	32.4	-1.75634	0.428771	-4.09622	4.2e-05	0.000460026	CRYGEP
ENSG00000229205.2	0.720365	-1.67797	0.634343	-2.64521	0.00816405	0.0339441	LINC00200
ENSG00000229356.1	2.65563	-1.4105	0.275333	-5.12289	3.01e-07	6.1e-06	LRRC3-AS1
ENSG00000229415.9	1.32725	-1.64962	0.467741	-3.52677	0.000420655	0.00317315	SFTA3
ENSG00000229495.1	0.722571	-1.01837	0.406452	-2.50553	0.0122269	0.0465484	RP11-173D14.3
ENSG00000229598.1	14.0385	-1.1023	0.232132	-4.74861	2.05e-06	3.35e-05	PRDX3P1
ENSG00000229657.2	3.59861	-1.76635	0.412423	-4.28287	1.84e-05	0.000226872	RP11-494K3.2
ENSG00000229776.1	144.134	-1.46527	0.238194	-6.1516	7.67e-10	2.77e-08	C4B-AS1
ENSG00000229807.9	23532.5	-1.43509	0.238724	-6.01148	1.84e-09	6.18e-08	XIST
ENSG00000229901.1	4.60444	-1.38724	0.262622	-5.28229	1.28e-07	2.82e-06	RP11-399E6.4
ENSG00000230122.1	0.564563	1.09815	0.379923	2.89046	0.0038468	0.0187401	ECEL1P3
ENSG00000230269.6	7.48624	-1.03485	0.386994	-2.67407	0.00749363	0.031714	RP1-40E16.9
ENSG00000230371.1	3.27538	-1.34698	0.329576	-4.08701	4.37e-05	0.000475449	KARSP2
ENSG00000230373.8	745.856	-2.4535	0.247062	-9.9307	3.06e-23	8.85e-21	GOLGA6L5P
ENSG00000230461.8	4.76516	-1.02477	0.330674	-3.09904	0.00194151	0.0108728	PROX1-AS1
ENSG00000230470.1	0.879547	-1.89348	0.532973	-3.55267	0.000381336	0.00293033	GS1-115G20.1
ENSG00000230601.5	0.54653	-1.38057	0.509942	-2.70732	0.00678297	0.0293175	RP11-402G3.3
ENSG00000230630.2	525.22	-1.57358	0.216504	-7.26814	3.64e-13	2.46e-11	DNM3OS
ENSG00000230731.2	2.49942	1.04889	0.242985	4.3167	1.58e-05	0.000198838	RP11-478K15.6
ENSG00000230779.1	1.46837	-1.24991	0.480939	-2.5989	0.00935236	0.0378259	RP1-140J1.4
ENSG00000230910.2	29.3252	-2.47153	0.368278	-6.71105	1.93e-11	9.58e-10	RP3-525N10.2
ENSG00000230955.1	10.2064	-3.39363	0.658738	-5.15171	2.58e-07	5.32e-06	RP11-109P14.10
ENSG00000230965.1	1.08013	-1.08914	0.435393	-2.5015	0.0123668	0.0469498	SNX18P13
ENSG00000231154.1	62.1312	-1.32051	0.196204	-6.7303	1.69e-11	8.53e-10	MORF4L2-AS1
ENSG00000231160.9	441.25	-2.04117	0.227071	-8.98911	2.49e-19	4.63e-17	KLF3-AS1
ENSG00000231252.1	1.26496	-1.18725	0.425127	-2.79268	0.00522727	0.023905	RP11-436K8.1
ENSG00000231329.7	6.76641	-1.29895	0.23862	-5.44359	5.22e-08	1.28e-06	RP1-225E12.2
ENSG00000231459.1	4.52233	-1.08956	0.248951	-4.37658	1.21e-05	0.000157194	LINC00032
ENSG00000231475.3	184.555	1.47708	0.42093	3.50908	0.000449661	0.00335265	IGHV4-31
ENSG00000231494.1	0.963457	-1.34247	0.385253	-3.48464	0.000492795	0.00360956	AC104634.3
ENSG00000231536.1	1.30726	-1.62386	0.431828	-3.76043	0.00016962	0.00148837	AC123886.2
ENSG00000231544.3	2.55217	-1.39694	0.380049	-3.67569	0.00023721	0.00197209	RSL24D1P11
ENSG00000231609.5	68.9987	-1.73606	0.209395	-8.29086	1.12e-16	1.4e-14	AC009501.4
ENSG00000231625.4	10.0943	-3.45844	0.415554	-8.32247	8.62e-17	1.08e-14	CTD-2104P17.1
ENSG00000231711.2	354.918	-1.35487	0.183696	-7.37561	1.64e-13	1.15e-11	LINC00899
ENSG00000231721.6	752.384	-1.41095	0.17556	-8.03686	9.22e-16	9.92e-14	LINC-PINT
ENSG00000231728.3	6.29631	-1.19296	0.248015	-4.81004	1.51e-06	2.55e-05	LL0XNC01-116E7.2
ENSG00000231747.1	4.55966	-1.55925	0.216718	-7.19481	6.25e-13	4.06e-11	AC079922.2
ENSG00000231768.1	44.4055	-1.15214	0.25025	-4.60394	4.15e-06	6.24e-05	LINC01354
ENSG00000231817.7	1.4893	-1.82762	0.472706	-3.8663	0.000110498	0.00103692	LINC01198
ENSG00000231827.3	2.61001	-1.49376	0.287109	-5.20276	1.96e-07	4.15e-06	RP11-216N14.5
ENSG00000231845.3	1.57522	-1.44976	0.362768	-3.99638	6.43e-05	0.000661432	HMGB3P14
ENSG00000231861.2	2.57417	-2.17193	0.410458	-5.29147	1.21e-07	2.7e-06	OR5K2
ENSG00000231875.1	2.07623	-1.31295	0.327718	-4.00633	6.17e-05	0.000639576	RP11-346E8.1
ENSG00000231971.5	6.36961	-1.176	0.326272	-3.60435	0.000312931	0.00248936	RP11-557H15.3
ENSG00000232018.4	10.5594	-3.48729	0.402967	-8.65404	4.97e-18	7.57e-16	AL132709.8
ENSG00000232034.1	2.56246	1.12854	0.259389	4.35078	1.36e-05	0.000174025	AC092168.2
ENSG00000232057.1	6.66986	-2.12014	0.417002	-5.08423	3.69e-07	7.3e-06	AC093390.1
ENSG00000232111.2	8.18845	-1.90804	0.634512	-3.00709	0.00263759	0.013882	RP11-126O22.1
ENSG00000232117.1	0.849199	-1.02752	0.331504	-3.09958	0.00193797	0.0108566	LINC00384
ENSG00000232144.1	0.929424	-2.20664	0.539804	-4.08786	4.35e-05	0.00047387	PSAT1P2
ENSG00000232196.3	8.40147	-1.79594	0.271119	-6.6242	3.49e-11	1.66e-09	MTRNR2L4
ENSG00000232372.1	2.20656	-1.47211	0.37936	-3.88051	0.000104236	0.00098849	GTF2IP20
ENSG00000232377.1	1.46381	-1.64107	0.422267	-3.88633	0.000101772	0.000968353	AC016910.1
ENSG00000232458.1	1.0466	-1.02064	0.356083	-2.8663	0.00415306	0.019922	LINC01450
ENSG00000232581.1	2.13854	-3.87765	1.37154	-2.82723	0.00469524	0.0219728	AC079742.4
ENSG00000232653.8	827.929	-2.11795	0.224488	-9.4346	3.93e-21	8.99e-19	GOLGA8N
ENSG00000232687.1	1.20901	-1.31051	0.399652	-3.27912	0.0010413	0.00661202	RPL12P9
ENSG00000232803.1	7.6721	-1.16597	0.293034	-3.97896	6.92e-05	0.00070292	SLCO4A1-AS1
ENSG00000232837.1	1.72355	-1.24409	0.330055	-3.76933	0.000163687	0.00144166	AF064858.7
ENSG00000232926.1	11.1975	-1.40064	0.2414	-5.80215	6.55e-09	1.94e-07	AC000078.5
ENSG00000232931.5	479.416	-1.37959	0.184194	-7.48987	6.89e-14	5.17e-12	LINC00342
ENSG00000232993.1	1.44389	-3.41551	1.06461	-3.20822	0.00133561	0.00806068	RP11-334A14.5
ENSG00000233024.7	2007.57	-1.38022	0.156853	-8.79943	1.38e-18	2.3e-16	RP11-1212A22.4
ENSG00000233033.1	10.7318	-1.43255	0.426085	-3.36213	0.000773434	0.00522857	CASK-AS1
ENSG00000233041.8	1.18555	-2.10993	0.447753	-4.71227	2.45e-06	3.89e-05	PHGR1
ENSG00000233295.3	3.09203	-1.1476	0.303518	-3.78099	0.000156203	0.00138684	FAM90A20P
ENSG00000233327.10	233.818	-2.47391	0.290287	-8.52228	1.56e-17	2.21e-15	USP32P2
ENSG00000233334.3	4.40753	-1.77389	0.280526	-6.32342	2.56e-10	1.03e-08	FAM53B-AS1
ENSG00000233355.6	20.5789	-1.94178	0.283321	-6.85366	7.2e-12	3.89e-10	CHRM3-AS2
ENSG00000233455.2	0.511762	1.12528	0.372075	3.02434	0.00249178	0.0132704	RP4-667H12.4
ENSG00000233478.1	3.52697	-1.64591	0.297723	-5.52834	3.23e-08	8.25e-07	RP1-187B23.1
ENSG00000233627.2	144.134	-1.46527	0.238194	-6.1516	7.67e-10	2.77e-08	C4A-AS1
ENSG00000233665.8	5.60943	-1.26113	0.317595	-3.97086	7.16e-05	0.000723361	RP11-523O18.5
ENSG00000233766.7	3.96218	-1.4605	0.316753	-4.61083	4.01e-06	6.07e-05	AC098617.1
ENSG00000233775.1	4.78509	-1.26943	0.252029	-5.03683	4.73e-07	9.03e-06	RP4-811H24.9
ENSG00000233858.4	4.23751	-1.744	0.294518	-5.92155	3.19e-09	1.01e-07	AC026904.1
ENSG00000233894.1	0.934427	-1.03248	0.373175	-2.76673	0.00566212	0.02544	RP4-650F12.2
ENSG00000233928.5	1.73353	-1.08453	0.379918	-2.85465	0.00430844	0.0205029	RP11-305F18.1
ENSG00000233967.6	32.8127	-1.30077	0.199629	-6.51595	7.22e-11	3.27e-09	RP11-250B2.3
ENSG00000234068.6	76.925	-3.38939	0.528006	-6.41923	1.37e-10	5.91e-09	PAGE2
ENSG00000234083.1	2.73493	-1.15253	0.433678	-2.65757	0.00787071	0.0330109	AJ006995.3
ENSG00000234177.5	1.71028	1.34539	0.437748	3.07344	0.00211607	0.0116403	LINC01114
ENSG00000234197.1	1.69851	1.18791	0.242774	4.89306	9.93e-07	1.75e-05	ETV5-AS1
ENSG00000234345.2	6.11213	-2.82668	0.398949	-7.08532	1.39e-12	8.5e-11	LL0XNC01-116E7.1
ENSG00000234353.2	55.9101	-1.18406	0.177477	-6.67164	2.53e-11	1.23e-09	AP000347.4
ENSG00000234362.5	17.7272	-1.82402	0.232185	-7.85589	3.97e-15	3.71e-13	AC104654.2
ENSG00000234389.1	1.59859	-1.11691	0.416054	-2.68453	0.00726325	0.0309116	AC007278.3
ENSG00000234456.7	1233.44	-1.60643	0.209717	-7.65998	1.86e-14	1.58e-12	MAGI2-AS3
ENSG00000234648.1	75.2364	-8.36001	0.771615	-10.8344	2.36e-27	1.22e-24	AL162151.3
ENSG00000234722.3	5.85036	-1.40348	0.274941	-5.10465	3.31e-07	6.65e-06	LINC01287
ENSG00000234927.1	3.59054	-3.45882	0.488414	-7.08175	1.42e-12	8.69e-11	HMGN1P18
ENSG00000234942.2	0.833995	-1.1849	0.400685	-2.95718	0.00310471	0.0158257	GRID1-AS1
ENSG00000235020.4	2.23106	-2.17328	0.445856	-4.87439	1.09e-06	1.91e-05	RP11-109I13.2
ENSG00000235174.1	305.183	-1.56285	0.22556	-6.92877	4.25e-12	2.39e-10	RPL39P3
ENSG00000235209.1	3.59939	-1.4092	0.314251	-4.4843	7.32e-06	0.000102477	CTA-150C2.13
ENSG00000235351.1	23.8201	-1.09521	0.247915	-4.41768	9.98e-06	0.00013356	AC114730.11
ENSG00000235370.6	93.218	-1.2621	0.22845	-5.52462	3.3e-08	8.41e-07	DNM1P51
ENSG00000235407.1	2.71102	-1.51907	0.454197	-3.34453	0.000824228	0.0054977	RP11-470L19.2
ENSG00000235426.2	1.05525	-1.9339	0.589161	-3.28246	0.00102904	0.00655001	RP11-342M3.5
ENSG00000235436.10	31.2086	-1.71126	0.272832	-6.2722	3.56e-10	1.39e-08	DPY19L2P4
ENSG00000235505.7	158.11	-1.34176	0.206158	-6.50837	7.6e-11	3.42e-09	RP11-693N9.2
ENSG00000235563.1	16.6246	-4.25905	0.437082	-9.74429	1.95e-22	5.12e-20	RP11-334A14.8
ENSG00000235602.5	17.3915	-1.2091	0.225942	-5.35135	8.73e-08	2.01e-06	POU5F1P3
ENSG00000235661.2	1.67318	-3.37361	0.669782	-5.03688	4.73e-07	9.03e-06	MIR670HG
ENSG00000235674.2	5.31507	-1.07114	0.267602	-4.00275	6.26e-05	0.000646989	LDHAP2
ENSG00000235677.1	7.69329	-1.11104	0.214156	-5.18798	2.13e-07	4.45e-06	NPM1P26
ENSG00000235703.5	297.696	-1.35267	0.188592	-7.1725	7.36e-13	4.73e-11	LINC00894
ENSG00000235790.7	14.4738	-1.69221	0.2528	-6.69386	2.17e-11	1.07e-09	RP11-73M7.6
ENSG00000235821.1	1.74164	-1.25752	0.384157	-3.27347	0.00106237	0.00672456	IFITM4P
ENSG00000235833.1	1.37029	-1.8498	0.35122	-5.2668	1.39e-07	3.05e-06	AC159540.14
ENSG00000235875.3	3.02109	-2.72439	0.497936	-5.47138	4.47e-08	1.11e-06	ARHGEF7-AS2
ENSG00000235946.1	21.6393	-2.17517	0.281796	-7.71896	1.17e-14	1.02e-12	LL0XNC01-240C2.1
ENSG00000235955.1	0.852082	1.01717	0.260174	3.9096	9.25e-05	0.000896672	CICP20
ENSG00000235996.1	0.803994	-2.02291	0.576553	-3.50862	0.000450437	0.00335697	RP11-97N19.2
ENSG00000236013.5	8.62554	-2.01336	0.32717	-6.15385	7.56e-10	2.74e-08	RP3-332B22.1
ENSG00000236031.1	2.5232	-1.42598	0.309892	-4.60155	4.19e-06	6.3e-05	RP11-269F20.1
ENSG00000236060.2	2.91391	-1.02863	0.220397	-4.66715	3.05e-06	4.75e-05	HSPB1P1
ENSG00000236136.1	1.74063	-1.96805	0.37541	-5.24242	1.58e-07	3.44e-06	ADORA2BP1
ENSG00000236173.1	2.3265	-3.17976	0.446934	-7.1146	1.12e-12	6.99e-11	RP1-182D15.2
ENSG00000236194.3	5.2606	-1.41696	0.282635	-5.0134	5.35e-07	1.01e-05	AC003104.1
ENSG00000236266.1	10.2114	-1.00433	0.200689	-5.00439	5.6e-07	1.05e-05	RP3-467L1.4
ENSG00000236279.6	44.3653	-1.66354	0.299464	-5.55506	2.78e-08	7.21e-07	CLEC2L
ENSG00000236289.2	2.1523	-1.1866	0.363457	-3.26476	0.00109558	0.00688747	GACAT3
ENSG00000236333.3	281.793	-1.40405	0.333508	-4.20994	2.55e-05	0.000303068	TRHDE-AS1
ENSG00000236366.1	2.70883	-1.34817	0.381202	-3.53663	0.000405274	0.00308303	RP11-440G9.1
ENSG00000236404.8	217.923	-2.12309	0.22939	-9.25537	2.13e-20	4.5e-18	VLDLR-AS1
ENSG00000236426.5	2.06755	-2.40235	0.474067	-5.06754	4.03e-07	7.85e-06	RP11-79M19.2
ENSG00000236528.1	9.03244	1.34067	0.336593	3.98305	6.8e-05	0.000693604	RP1-125I3.2
ENSG00000236536.1	0.950614	-1.35264	0.396715	-3.4096	0.000650578	0.00454447	AC003986.7
ENSG00000236737.1	2.77534	-3.81773	0.981472	-3.88981	0.000100325	0.000957251	GAGE12B
ENSG00000236754.5	3.18015	-1.03578	0.265412	-3.90253	9.52e-05	0.000917797	AC004019.13
ENSG00000236849.5	2.2232	-1.97172	0.372255	-5.29669	1.18e-07	2.63e-06	LINC01474
ENSG00000236882.7	14.0404	-2.75871	0.320087	-8.61862	6.78e-18	1e-15	LINC01554
ENSG00000236883.1	11.5466	-3.46357	0.724357	-4.78158	1.74e-06	2.89e-05	AP001615.9
ENSG00000236998.2	1.60372	-1.16431	0.315373	-3.69186	0.000222617	0.00187083	RP11-203L2.3
ENSG00000237070.1	2.78189	-2.86279	0.537808	-5.32307	1.02e-07	2.31e-06	AC005550.3
ENSG00000237115.2	7.52367	-1.58424	0.274205	-5.77758	7.58e-09	2.21e-07	RP1-131F15.2
ENSG00000237125.8	503.789	-4.08126	0.322253	-12.6648	9.27e-37	1.98e-33	HAND2-AS1
ENSG00000237161.4	34.9946	-1.265	0.235487	-5.37185	7.79e-08	1.82e-06	RP11-32B5.1
ENSG00000237212.1	1.07103	-1.49954	0.493201	-3.04043	0.00236244	0.0127086	RP11-569G13.2
ENSG00000237390.1	0.872268	-1.50221	0.538329	-2.7905	0.00526261	0.0240215	RP11-139I14.2
ENSG00000237438.6	270.796	-1.024	0.231199	-4.42907	9.46e-06	0.000127799	CECR7
ENSG00000237531.5	2.50903	-2.68996	0.425018	-6.32906	2.47e-10	9.92e-09	RP11-309M23.1
ENSG00000237560.5	5.00724	-3.13392	0.539926	-5.80435	6.46e-09	1.92e-07	LINC01497
ENSG00000237621.3	0.787834	1.02886	0.278595	3.69305	0.000221584	0.00186628	OR9A1P
ENSG00000237624.1	67.5041	-1.92703	0.266835	-7.2218	5.13e-13	3.38e-11	OXCT2P1
ENSG00000237731.1	0.769969	-1.41169	0.425588	-3.31702	0.000909815	0.00594991	RNGTTP1
ENSG00000237861.1	2.27308	-1.36696	0.309416	-4.41787	9.97e-06	0.000133496	RP11-332L8.1
ENSG00000237863.2	54.2395	-3.35938	0.342801	-9.7998	1.13e-22	3.03e-20	RP6-24A23.3
ENSG00000237940.3	55.9635	-1.3062	0.216223	-6.04097	1.53e-09	5.23e-08	AC093642.3
ENSG00000237949.1	8.66841	-3.9981	0.565627	-7.06845	1.57e-12	9.48e-11	LINC00844
ENSG00000237988.3	38.9203	1.39044	0.295106	4.71165	2.46e-06	3.9e-05	OR2I1P
ENSG00000238039.1	39.3582	-1.13865	0.196732	-5.78782	7.13e-09	2.1e-07	AF011889.2
ENSG00000238057.8	13.0756	-1.24648	0.21369	-5.83314	5.44e-09	1.64e-07	ZEB2-AS1
ENSG00000238099.2	5.43769	-1.12378	0.257415	-4.36563	1.27e-05	0.000164343	RP11-12A2.3
ENSG00000238133.6	5.61344	-1.61018	0.254395	-6.32944	2.46e-10	9.91e-09	MLK7-AS1
ENSG00000238222.3	6.17057	-1.0216	0.327386	-3.12049	0.00180548	0.010261	MKRN4P
ENSG00000238273.3	121.342	-2.96472	0.286612	-10.344	4.45e-25	1.67e-22	AC012360.6
ENSG00000238358.2	1.4459	-2.1671	0.427842	-5.06518	4.08e-07	7.93e-06	RP5-1121E10.2
ENSG00000238917.1	13.8639	-1.05213	0.365848	-2.87588	0.00402907	0.0194475	SNORD10
ENSG00000239198.1	0.717843	-1.09811	0.32295	-3.40025	0.000673236	0.00467052	RPL5P22
ENSG00000239257.1	25.5332	-1.87881	0.258068	-7.28028	3.33e-13	2.27e-11	RPL23AP1
ENSG00000239367.2	0.883889	-1.00446	0.315272	-3.186	0.00144254	0.00857495	RN7SL477P
ENSG00000239528.1	3.731	-1.10777	0.333486	-3.32177	0.000894482	0.00587215	RPS14P8
ENSG00000239677.6	5.91204	-2.1726	0.391017	-5.55627	2.76e-08	7.18e-07	PDZRN3-AS1
ENSG00000239704.10	340.476	-1.38467	0.19606	-7.06248	1.64e-12	9.84e-11	CDRT4
ENSG00000239828.6	9.82589	-1.39059	0.2241	-6.20525	5.46e-10	2.05e-08	RP11-446H18.5
ENSG00000239839.5	2.49759	-1.46334	0.547572	-2.67241	0.00753082	0.0318398	DEFA3
ENSG00000239855.1	113.955	1.01142	0.364943	2.77143	0.005581	0.0251559	IGKV1-6
ENSG00000239873.2	1.14588	-1.03145	0.39728	-2.59627	0.00942416	0.0380705	GAPDHP27
ENSG00000239884.3	6.52039	-1.01873	0.222881	-4.57074	4.86e-06	7.16e-05	RN7SL608P
ENSG00000239899.3	4.45099	-1.77154	0.410947	-4.31087	1.63e-05	0.000203334	RN7SL674P
ENSG00000239959.1	7.54422	-1.32584	0.25416	-5.21654	1.82e-07	3.89e-06	ENPP7P2
ENSG00000239975.2	763.394	1.64621	0.466618	3.52796	0.000418771	0.00316308	IGKV1D-33
ENSG00000240045.1	1.15049	-1.99818	0.479967	-4.16317	3.14e-05	0.000360355	RP11-451G4.2
ENSG00000240180.1	9.38621	-1.09591	0.377301	-2.9046	0.00367722	0.0181262	RP11-318E3.4
ENSG00000240194.6	1.47179	-2.74092	0.541477	-5.06194	4.15e-07	8.05e-06	CYMP
ENSG00000240231.1	0.937829	-1.04892	0.286474	-3.6615	0.000250747	0.0020655	RPS27P29
ENSG00000240247.6	2.75143	-1.97755	0.509801	-3.87905	0.000104863	0.000993607	DEFA1B
ENSG00000240303.7	1411.41	-1.09847	0.159762	-6.87565	6.17e-12	3.39e-10	ACAD11
ENSG00000240338.5	4.03318	-1.34258	0.255719	-5.2502	1.52e-07	3.31e-06	RP11-331F4.4
ENSG00000240382.3	251.239	1.84531	0.358826	5.14262	2.71e-07	5.57e-06	IGKV1-17
ENSG00000240522.1	26.2595	-1.52102	0.249946	-6.0854	1.16e-09	4.05e-08	RPL7AP10
ENSG00000240733.3	0.71239	1.061	0.245851	4.31561	1.59e-05	0.000199675	RN7SL502P
ENSG00000240761.1	4.4735	1.5988	0.399184	4.00518	6.2e-05	0.000641928	AC098831.4
ENSG00000240975.1	1.89347	-1.92399	0.642408	-2.99497	0.0027447	0.014331	RP11-313M3.1
ENSG00000240979.1	14.4426	-1.38828	0.273736	-5.07158	3.95e-07	7.73e-06	RP11-79D8.2
ENSG00000241020.1	6.58698	-1.49509	0.421205	-3.54956	0.000385869	0.00295983	RP11-727A23.1
ENSG00000241073.1	2.50046	-1.46676	0.50645	-2.89617	0.0037775	0.0184736	RP4-714D9.2
ENSG00000241111.1	7.81437	-2.03183	0.340952	-5.9593	2.53e-09	8.29e-08	PRICKLE2-AS1
ENSG00000241135.5	4.61049	-1.32144	0.301623	-4.3811	1.18e-05	0.000154322	LINC00881
ENSG00000241158.5	355.998	-2.62795	0.275784	-9.52905	1.59e-21	3.84e-19	ADAMTS9-AS1
ENSG00000241186.7	140.674	-1.98422	0.263404	-7.53298	4.96e-14	3.83e-12	TDGF1
ENSG00000241218.1	38.3851	-2.57228	0.29078	-8.84613	9.06e-19	1.56e-16	RP11-446H18.1
ENSG00000241244.1	17.2507	2.01166	0.396546	5.07294	3.92e-07	7.68e-06	IGKV1D-16
ENSG00000241362.2	4.79417	-1.17864	0.273825	-4.30436	1.67e-05	0.000208792	RPL36AP43
ENSG00000241404.6	837.089	-1.76398	0.191251	-9.22335	2.88e-20	5.99e-18	EGFL8
ENSG00000241416.1	3.44008	-1.77448	0.33104	-5.3603	8.31e-08	1.92e-06	KRT8P13
ENSG00000241607.1	2.48877	-1.00571	0.297091	-3.38518	0.000711328	0.00488844	RP11-357K9.2
ENSG00000241644.2	357.881	-1.63783	0.237249	-6.90339	5.08e-12	2.82e-10	INMT
ENSG00000241684.5	187.113	-2.70383	0.272072	-9.9379	2.85e-23	8.3e-21	ADAMTS9-AS2
ENSG00000241720.2	0.957078	-1.85807	0.525196	-3.53785	0.000403393	0.00307009	RP4-735C1.4
ENSG00000241728.5	17.2527	-1.74126	0.298829	-5.82695	5.65e-09	1.7e-07	AP001062.8
ENSG00000241755.1	435.606	1.12702	0.360446	3.12674	0.00176756	0.0100892	IGKV1-9
ENSG00000241769.7	334.165	-1.06747	0.173158	-6.16475	7.06e-10	2.58e-08	LINC00893
ENSG00000241794.1	7.7718	-2.45226	0.439197	-5.5835	2.36e-08	6.22e-07	SPRR2A
ENSG00000241956.9	1.23138	-1.92217	0.541256	-3.55132	0.00038331	0.00294153	CTC-340A15.2
ENSG00000242034.1	2.64246	-1.82283	0.349079	-5.22184	1.77e-07	3.79e-06	RP11-1396O13.1
ENSG00000242068.1	7.59816	-3.63981	0.452048	-8.05184	8.16e-16	8.83e-14	RP11-259P15.4
ENSG00000242076.2	1954.67	1.6598	0.396216	4.18913	2.8e-05	0.000326677	IGKV1-33
ENSG00000242082.1	11.2218	1.23745	0.224893	5.50242	3.75e-08	9.45e-07	RP1-90G24.10
ENSG00000242267.6	9.36533	-1.94293	0.314652	-6.17485	6.62e-10	2.45e-08	SKINTL
ENSG00000242327.1	0.86553	-1.1075	0.335446	-3.30158	0.000961418	0.00620999	CTD-2184D3.1
ENSG00000242371.1	172.535	1.45227	0.49516	2.93293	0.00335779	0.0168835	IGKV1-39
ENSG00000242375.1	12.3718	-2.24829	0.414365	-5.42587	5.77e-08	1.4e-06	RP11-498P14.3
ENSG00000242441.7	33.822	-1.14064	0.211047	-5.40467	6.49e-08	1.54e-06	GTF2A1L
ENSG00000242479.1	2.47628	-3.7741	1.29073	-2.92402	0.00345546	0.0172601	RP11-383G6.4
ENSG00000242675.1	0.935433	1.10964	0.443289	2.5032	0.0123075	0.0467664	RPS16P9
ENSG00000242697.2	4.58123	-1.023	0.230515	-4.43786	9.09e-06	0.000123819	RPL5P12
ENSG00000242797.3	17.3769	-1.33304	0.25558	-5.21574	1.83e-07	3.9e-06	GLYCTK-AS1
ENSG00000242853.3	1.15339	-2.4549	0.538695	-4.55712	5.19e-06	7.58e-05	RN7SL749P
ENSG00000242899.1	1.85053	-1.11456	0.401643	-2.775	0.00552015	0.0249368	RPL7P16
ENSG00000242941.1	1.94244	-2.24177	0.429211	-5.22301	1.76e-07	3.77e-06	CTD-2325P2.2
ENSG00000243175.1	4.47475	-1.5483	0.261527	-5.92024	3.21e-09	1.02e-07	RP11-58H15.1
ENSG00000243323.5	37.2532	-1.41709	0.222165	-6.37856	1.79e-10	7.47e-09	PTPRVP
ENSG00000243455.3	2.5802	1.25134	0.330059	3.79126	0.000149886	0.00134158	RPS18P13
ENSG00000243466.1	2760.04	2.15124	0.353277	6.0894	1.13e-09	3.97e-08	IGKV1-5
ENSG00000243478.7	1.91829	-2.66647	0.596521	-4.47003	7.82e-06	0.00010862	AOX2P
ENSG00000243480.7	15.7167	-2.48464	0.36842	-6.74404	1.54e-11	7.85e-10	AMY2A
ENSG00000243675.1	2.0203	-2.1443	0.405829	-5.28374	1.27e-07	2.81e-06	RP11-379F4.1
ENSG00000243686.2	4.74866	-1.00259	0.245402	-4.0855	4.4e-05	0.000477631	RPLP1P11
ENSG00000243708.8	649.649	-1.71639	0.205827	-8.33898	7.49e-17	9.61e-15	PLA2G4B
ENSG00000243829.1	13.0366	-1.28599	0.190246	-6.75959	1.38e-11	7.14e-10	CTB-33G10.1
ENSG00000243955.5	535.966	-1.21631	0.264414	-4.60001	4.22e-06	6.33e-05	GSTA1
ENSG00000244021.4	5.72004	-1.02401	0.230006	-4.45209	8.5e-06	0.00011659	RP11-50D9.1
ENSG00000244056.3	6.72591	-2.45801	0.333445	-7.37156	1.69e-13	1.19e-11	RN7SL417P
ENSG00000244094.1	338.984	-3.88192	0.415155	-9.35053	8.72e-21	1.92e-18	SPRR2F
ENSG00000244119.1	41.2187	-1.25014	0.190974	-6.54613	5.9e-11	2.7e-09	PDCL3P4
ENSG00000244124.1	7.81114	-1.90179	0.333398	-5.70426	1.17e-08	3.28e-07	ATP1B3-AS1
ENSG00000244245.1	3.59372	-1.06543	0.245187	-4.34538	1.39e-05	0.000177592	RP11-120B7.1
ENSG00000244255.5	245.561	1.37136	0.378251	3.62553	0.000288374	0.00232491	XXbac-BPG116M5.17
ENSG00000244301.5	4.93308	-3.84159	0.505768	-7.59555	3.06e-14	2.5e-12	AOX3P
ENSG00000244480.1	37.3166	-1.16602	0.208124	-5.60252	2.11e-08	5.65e-07	AC005154.7
ENSG00000244491.1	151.553	-2.37154	0.38112	-6.22254	4.89e-10	1.86e-08	RP3-508I15.18
ENSG00000244560.6	441.954	-1.20602	0.181426	-6.64746	2.98e-11	1.44e-09	RP4-800G7.2
ENSG00000244578.1	100.292	-2.5639	0.389848	-6.57666	4.81e-11	2.25e-09	LINC01391
ENSG00000244734.3	1538.15	-1.68344	0.220184	-7.6456	2.08e-14	1.74e-12	HBB
ENSG00000244738.1	2.477	-2.60964	0.499209	-5.22755	1.72e-07	3.69e-06	RP11-373E16.3
ENSG00000244953.1	77.9651	-4.47935	0.360263	-12.4336	1.72e-35	2.79e-32	RP11-613D13.8
ENSG00000245385.2	42.2995	-4.10016	0.787854	-5.20422	1.95e-07	4.13e-06	RP11-334E6.10
ENSG00000245532.5	36795.9	-1.52269	0.19629	-7.75734	8.67e-15	7.64e-13	NEAT1
ENSG00000246022.2	47.4257	-4.03789	0.398674	-10.1283	4.14e-24	1.38e-21	ALDH1L1-AS2
ENSG00000246792.2	14.2503	-1.39836	0.220449	-6.34322	2.25e-10	9.18e-09	RP11-68L18.1
ENSG00000246922.8	428.744	-1.04592	0.187686	-5.57272	2.51e-08	6.59e-07	UBAP1L
ENSG00000246985.7	50.204	-1.17578	0.213487	-5.50753	3.64e-08	9.21e-07	SOCS2-AS1
ENSG00000247765.2	24.0212	-1.0245	0.267104	-3.8356	0.00012526	0.001152	RP11-32B5.7
ENSG00000247775.2	0.898585	-1.1902	0.3577	-3.32737	0.000876714	0.00576994	SNCA-AS1
ENSG00000247809.7	137.964	-2.69916	0.267085	-10.106	5.2e-24	1.72e-21	NR2F2-AS1
ENSG00000247993.2	3.72615	-2.32957	0.447282	-5.20829	1.91e-07	4.05e-06	FOXD1-AS1
ENSG00000248019.2	141.976	-1.64811	0.206041	-7.99895	1.25e-15	1.32e-13	FAM13A-AS1
ENSG00000248115.1	57.4173	-3.85124	0.340814	-11.3001	1.31e-29	9.31e-27	RP11-752D24.2
ENSG00000248124.7	423.5	-1.23906	0.167216	-7.40993	1.26e-13	9.04e-12	RRN3P1
ENSG00000248144.5	66.2205	-1.32161	0.271572	-4.86652	1.14e-06	1.98e-05	ADH1C
ENSG00000248174.5	14.7339	-2.77151	0.400971	-6.912	4.78e-12	2.66e-10	RP11-148L24.1
ENSG00000248215.5	1.3782	-2.09686	0.665743	-3.14966	0.00163462	0.0094914	RP11-722M1.1
ENSG00000248254.1	1.22959	-1.36308	0.402804	-3.38397	0.000714446	0.00490549	AC092597.3
ENSG00000248290.1	37.7791	-1.28884	0.358585	-3.59422	0.00032536	0.00257089	TNXA
ENSG00000248300.1	2.32142	-3.79591	0.656655	-5.78068	7.44e-09	2.17e-07	RP11-74M11.2
ENSG00000248309.5	28.8703	-1.91572	0.271575	-7.05413	1.74e-12	1.04e-10	MEF2C-AS1
ENSG00000248334.6	154.69	-1.68072	0.226628	-7.41622	1.21e-13	8.65e-12	WHAMMP2
ENSG00000248409.1	14.9621	-1.64238	0.324948	-5.05428	4.32e-07	8.32e-06	KB-1269D1.8
ENSG00000248429.5	186.04	-2.16403	0.241438	-8.96309	3.16e-19	5.76e-17	RP11-597D13.9
ENSG00000248441.6	181.498	-1.71943	0.237734	-7.23259	4.74e-13	3.14e-11	LINC01197
ENSG00000248445.5	40.2345	-1.16864	0.1965	-5.94726	2.73e-09	8.82e-08	SEMA6A-AS1
ENSG00000248464.1	1.52325	-2.81092	0.516294	-5.44442	5.2e-08	1.27e-06	FGF10-AS1
ENSG00000248469.1	8.50995	-1.66114	0.317381	-5.23389	1.66e-07	3.58e-06	RP11-826N14.2
ENSG00000248475.5	1.46267	-1.91756	0.601644	-3.1872	0.00143656	0.00854594	RP11-479O16.1
ENSG00000248514.1	1.3525	-1.34288	0.388663	-3.45513	0.00055003	0.00395074	CTC-338M12.1
ENSG00000248564.1	3.12149	-1.31862	0.298639	-4.41544	1.01e-05	0.000134637	RP11-478C6.2
ENSG00000248587.6	80.0614	-2.2046	0.282718	-7.7979	6.29e-15	5.67e-13	GDNF-AS1
ENSG00000248596.6	790.934	-1.88085	0.237371	-7.92366	2.31e-15	2.29e-13	RP11-844P9.2
ENSG00000248668.2	27.5949	-1.06127	0.179519	-5.91173	3.39e-09	1.07e-07	OXCT1-AS1
ENSG00000248672.5	5.5166	1.55508	0.467316	3.32769	0.0008757	0.00576661	LY75-CD302
ENSG00000248677.1	16.0378	-2.24964	0.269272	-8.35455	6.57e-17	8.45e-15	CTD-2044J15.1
ENSG00000248711.1	0.690279	-1.25448	0.484115	-2.59129	0.00956158	0.0384889	THUMPD3P1
ENSG00000248771.5	1.3008	1.52291	0.477521	3.1892	0.00142665	0.00849945	LINC01207
ENSG00000248774.1	3.8229	1.02624	0.384692	2.66768	0.00763772	0.032204	RP11-798M19.3
ENSG00000248810.1	49.3056	-1.69638	0.284783	-5.95673	2.57e-09	8.38e-08	RP11-362F19.1
ENSG00000248993.1	91.9321	1.42243	0.526997	2.69912	0.00695238	0.029903	XXbac-BPG181M17.5
ENSG00000249069.7	0.737016	-1.14981	0.45231	-2.54207	0.0110197	0.0429691	LINC01033
ENSG00000249125.1	2.25549	-1.92228	0.693913	-2.7702	0.00560213	0.0252236	RP11-381N20.2
ENSG00000249138.1	2.09748	-1.04361	0.259515	-4.0214	5.79e-05	0.000602951	SLED1
ENSG00000249212.1	4.1311	-1.10281	0.253201	-4.35548	1.33e-05	0.000170782	ATP1B1P1
ENSG00000249228.1	1.47718	-1.99914	0.649207	-3.07935	0.00207451	0.0114643	RP11-769N22.1
ENSG00000249242.7	516.579	-1.42691	0.199436	-7.15473	8.38e-13	5.35e-11	TMEM150C
ENSG00000249258.2	2.47401	-1.47446	0.312957	-4.71136	2.46e-06	3.9e-05	RP11-468H14.2
ENSG00000249307.5	49.9301	-2.62179	0.261966	-10.0081	1.4e-23	4.39e-21	LINC01088
ENSG00000249379.1	1.58284	-1.30443	0.388727	-3.35565	0.000791782	0.00533238	RP1-27K12.4
ENSG00000249451.1	1.07944	-1.48019	0.452778	-3.26912	0.00107882	0.00680843	RP11-94C24.6
ENSG00000249476.1	24.8254	-1.05894	0.211295	-5.01168	5.4e-07	1.02e-05	CTD-2587M2.1
ENSG00000249624.8	43.0079	1.1534	0.287868	4.00669	6.16e-05	0.000638799	AP000295.9
ENSG00000249669.7	621.946	-2.95429	0.267184	-11.0571	2.02e-28	1.1e-25	MIR143HG
ENSG00000249767.1	5.40254	-1.56868	0.283394	-5.53533	3.11e-08	7.97e-07	ENPP7P10
ENSG00000249931.4	16.0084	-1.05222	0.264662	-3.97572	7.02e-05	0.000711269	GOLGA8K
ENSG00000249945.1	1.59756	-1.59282	0.603366	-2.63988	0.00829345	0.034349	RP11-598D14.1
ENSG00000249955.1	4.27562	1.5049	0.555512	2.70903	0.00674797	0.0291995	RP11-6E9.4
ENSG00000249971.1	37.6049	-1.84421	0.578564	-3.18757	0.00143473	0.00853804	RP11-256P1.1
ENSG00000250056.5	158.686	-1.14536	0.238255	-4.80729	1.53e-06	2.58e-05	LINC01018
ENSG00000250064.1	1.1571	-2.04619	0.569122	-3.59534	0.00032397	0.00256283	RP11-123O22.1
ENSG00000250135.1	3.22134	-4.10084	0.731914	-5.6029	2.11e-08	5.64e-07	RP4-622L5.2
ENSG00000250254.1	1.40053	-1.07924	0.303854	-3.55185	0.000382537	0.00293824	PTTG2
ENSG00000250286.1	4.94519	-1.46263	0.244701	-5.97719	2.27e-09	7.52e-08	RP11-94C24.8
ENSG00000250327.1	8.96028	-1.14825	0.22148	-5.18446	2.17e-07	4.53e-06	RP11-173M11.2
ENSG00000250329.1	2.35452	-1.85396	0.359003	-5.1642	2.41e-07	5e-06	KDELC1P1
ENSG00000250330.1	0.570704	1.06712	0.279947	3.81188	0.000137913	0.00124916	CTC-422A18.2
ENSG00000250334.5	5.84654	-3.04916	0.389655	-7.82528	5.07e-15	4.67e-13	LINC00989
ENSG00000250337.5	5.01879	-1.84419	0.371144	-4.96894	6.73e-07	1.24e-05	LINC01021
ENSG00000250343.1	1.91849	-1.78074	0.401692	-4.43311	9.29e-06	0.000125828	CTC-255N20.1
ENSG00000250397.2	57.8836	-1.11393	0.182955	-6.08855	1.14e-09	3.98e-08	RP11-1391J7.1
ENSG00000250413.1	9.87582	1.02605	0.259913	3.94766	7.89e-05	0.000786202	RP11-448G15.1
ENSG00000250538.5	3.87753	-1.71751	0.413958	-4.14899	3.34e-05	0.000380844	RP11-92A5.2
ENSG00000250564.1	7.79402	-1.56534	0.589169	-2.65686	0.00788734	0.0330644	RP11-215P8.4
ENSG00000250579.1	67.6979	-3.11	0.479493	-6.48602	8.81e-11	3.91e-09	CTD-2297D10.2
ENSG00000250584.2	2.71807	-1.56488	0.452149	-3.46099	0.000538202	0.00387967	LINC01511
ENSG00000250651.1	4.04568	-1.50539	0.29408	-5.11897	3.07e-07	6.21e-06	PABPC1P7
ENSG00000250658.1	2.28531	-2.51644	0.507495	-4.95855	7.1e-07	1.3e-05	RP11-138B4.1
ENSG00000250685.7	2.47452	-2.08481	0.473847	-4.39975	1.08e-05	0.000143396	RP11-486L19.2
ENSG00000250739.1	1.91576	-3.42787	0.588312	-5.82663	5.66e-09	1.7e-07	LINC01262
ENSG00000250781.1	0.635022	-1.33667	0.478613	-2.79281	0.00522528	0.023905	RP11-63A11.1
ENSG00000250846.6	2.73155	-1.50575	0.396985	-3.79297	0.000148855	0.0013334	EPHA5-AS1
ENSG00000250906.1	3.83959	-1.88324	0.346085	-5.44155	5.28e-08	1.29e-06	RP11-632F7.3
ENSG00000250961.1	2.05918	-2.47913	0.518146	-4.78461	1.71e-06	2.86e-05	CTD-2023N9.1
ENSG00000251023.1	33.37	-1.02254	0.159783	-6.39959	1.56e-10	6.6e-09	RP11-549J18.1
ENSG00000251039.2	28.7033	1.11355	0.445171	2.50139	0.0123705	0.0469588	IGKV2D-40
ENSG00000251085.1	1.72959	-1.16231	0.3162	-3.67588	0.000237031	0.00197108	RP11-893F2.6
ENSG00000251095.6	2.31917	-1.56493	0.378714	-4.13221	3.59e-05	0.000405418	RP11-115D19.1
ENSG00000251126.2	43.0594	-1.59063	0.386589	-4.11451	3.88e-05	0.00043248	RP11-119H12.6
ENSG00000251129.1	35.9564	-1.78055	0.572523	-3.11001	0.0018708	0.0105531	RP11-734I18.1
ENSG00000251226.1	20.8373	-1.32968	0.327209	-4.06369	4.83e-05	0.00051862	RP11-469N6.1
ENSG00000251254.1	1.65906	-1.10454	0.283407	-3.89737	9.72e-05	0.000933869	GTF2F2P1
ENSG00000251348.1	17.2046	-3.81179	0.420979	-9.05458	1.37e-19	2.66e-17	HSPD1P11
ENSG00000251429.1	22.8594	-1.53426	0.233591	-6.56817	5.09e-11	2.36e-09	RP11-597D13.7
ENSG00000251435.1	0.882756	-1.39842	0.491222	-2.84682	0.00441583	0.0209177	C1GALT1P2
ENSG00000251450.1	5.1992	-1.43567	0.311286	-4.61206	3.99e-06	6.04e-05	RASGRF2-AS1
ENSG00000251491.2	54.7332	-1.0125	0.306212	-3.30652	0.000944619	0.00612351	OR7E28P
ENSG00000251518.1	0.759271	-1.32853	0.486291	-2.73197	0.0062957	0.0276565	CTD-2130F23.2
ENSG00000251546.1	4104.28	1.28546	0.365752	3.51457	0.000440461	0.00329631	IGKV1D-39
ENSG00000251609.2	1.12748	-1.61292	0.361851	-4.45741	8.3e-06	0.000114147	SETP12
ENSG00000251610.1	1.07627	1.12064	0.426134	2.62979	0.00854382	0.0352106	RP11-77P16.3
ENSG00000251667.1	17.6321	-1.6554	0.238433	-6.94282	3.84e-12	2.19e-10	BRCC3P1
ENSG00000251682.1	1.81271	-1.36176	0.306883	-4.43739	9.11e-06	0.000124041	RP11-631M6.3
ENSG00000251791.1	23.2462	-1.38328	0.273805	-5.05206	4.37e-07	8.39e-06	SCARNA6
ENSG00000252010.1	33.4209	-1.75491	0.283044	-6.20014	5.64e-10	2.11e-08	SCARNA5
ENSG00000253105.5	1.90367	-1.37871	0.42528	-3.24188	0.00118745	0.00734471	KB-1448A5.1
ENSG00000253123.3	56.1018	-1.7838	0.238161	-7.48989	6.89e-14	5.17e-12	RP11-527N22.1
ENSG00000253230.6	1.39542	-2.3861	0.509418	-4.68397	2.81e-06	4.41e-05	LINC00599
ENSG00000253250.2	97.8528	-1.05868	0.182731	-5.79365	6.89e-09	2.04e-07	C8orf88
ENSG00000253304.1	635.849	-1.77957	0.209968	-8.47545	2.34e-17	3.25e-15	TMEM200B
ENSG00000253330.1	31.0292	-1.01519	0.185303	-5.47858	4.29e-08	1.07e-06	RP11-697N18.3
ENSG00000253356.1	54.9489	-7.59675	0.749741	-10.1325	3.96e-24	1.34e-21	RP11-90P5.2
ENSG00000253369.1	18.6774	-2.35859	0.368358	-6.40299	1.52e-10	6.47e-09	RP11-1081M5.1
ENSG00000253415.1	0.750571	-1.08432	0.433094	-2.50365	0.012292	0.0467283	RP11-44N12.4
ENSG00000253476.1	5.79631	-1.52992	0.301555	-5.07344	3.91e-07	7.67e-06	RP11-395I14.2
ENSG00000253497.1	0.56651	1.25684	0.495787	2.53503	0.0112437	0.0436329	IGKV1-13
ENSG00000253525.1	53.3159	1.18816	0.237377	5.00537	5.58e-07	1.05e-05	CTD-2114J12.1
ENSG00000253621.1	0.497171	1.06262	0.41697	2.54843	0.0108208	0.0423969	RP11-255L13.1
ENSG00000253722.1	9.68846	-1.5419	0.345424	-4.46378	8.05e-06	0.000111433	RP11-10N23.4
ENSG00000253744.1	1.07511	1.002	0.321026	3.12125	0.00180085	0.0102381	AC025442.3
ENSG00000253967.1	2.0045	-2.37679	0.488888	-4.86163	1.16e-06	2.02e-05	RP11-333A23.4
ENSG00000254010.1	3.75647	1.0476	0.268981	3.89469	9.83e-05	0.000941853	RP11-103H7.5
ENSG00000254042.1	2.55608	-1.18664	0.265235	-4.47392	7.68e-06	0.000106926	CTC-558O2.1
ENSG00000254109.5	48.0334	-1.40016	0.190014	-7.36874	1.72e-13	1.21e-11	RBPMS-AS1
ENSG00000254139.1	1.45035	-1.45123	0.368116	-3.94232	8.07e-05	0.000799972	CTD-2339F6.1
ENSG00000254192.1	4.97129	-1.57038	0.361262	-4.34692	1.38e-05	0.000176658	CTC-558O2.2
ENSG00000254226.5	15.1922	-1.50865	0.285031	-5.29293	1.2e-07	2.68e-06	CTB-12O2.1
ENSG00000254230.1	1.97515	-1.56122	0.583305	-2.67651	0.00743936	0.0315389	RP11-582J16.3
ENSG00000254251.1	1.03263	-1.65142	0.454124	-3.6365	0.000276372	0.00224087	RP11-662G23.1
ENSG00000254254.5	1.78948	-1.64022	0.539563	-3.03991	0.00236646	0.0127278	RP11-17A4.2
ENSG00000254266.5	4.17482	-1.39714	0.326072	-4.28477	1.83e-05	0.000225188	PKIA-AS1
ENSG00000254319.5	2.59257	-1.46963	0.319824	-4.59513	4.32e-06	6.46e-05	RP11-134O21.1
ENSG00000254352.1	2.91605	-1.44986	0.281092	-5.15795	2.5e-07	5.15e-06	RP11-578O24.2
ENSG00000254362.1	1.54106	-2.45693	0.456702	-5.37973	7.46e-08	1.75e-06	RP11-14I17.3
ENSG00000254395.1	6.96269	2.10562	0.47067	4.47367	7.69e-06	0.000106964	IGHV4-55
ENSG00000254400.1	0.943493	-1.52895	0.558378	-2.73819	0.00617775	0.0272648	RP11-732A19.8
ENSG00000254429.1	1.65983	-1.54821	0.378099	-4.09472	4.23e-05	0.000462255	CTD-2562J17.7
ENSG00000254433.1	7.14408	-1.22345	0.252215	-4.85085	1.23e-06	2.12e-05	RP11-677I18.3
ENSG00000254452.1	43.2002	-4.9576	0.443326	-11.1827	4.95e-29	2.91e-26	RP11-867G23.4
ENSG00000254461.1	29.3834	-1.92641	0.233044	-8.26631	1.38e-16	1.69e-14	RP11-755F10.3
ENSG00000254501.1	36.5688	-1.65975	0.218651	-7.59087	3.18e-14	2.59e-12	AP003068.9
ENSG00000254506.1	7.2153	-1.23994	0.291103	-4.25946	2.05e-05	0.000248667	RP11-748H22.1
ENSG00000254510.1	11.9091	-1.05744	0.234715	-4.50522	6.63e-06	9.39e-05	RP11-867G23.10
ENSG00000254528.7	51.5523	-1.08735	0.195557	-5.56024	2.69e-08	7.03e-07	RP11-728F11.4
ENSG00000254539.1	47.2604	-1.1511	0.171183	-6.72437	1.76e-11	8.81e-10	RP4-791M13.3
ENSG00000254636.1	3.36906	-2.17384	0.364817	-5.95872	2.54e-09	8.31e-08	ARMS2
ENSG00000254639.1	1.26586	-1.0598	0.339436	-3.12224	0.00179479	0.010209	CTD-2589M5.5
ENSG00000254647.6	0.998542	-2.33231	0.669394	-3.4842	0.000493602	0.00361315	INS
ENSG00000254656.1	23.4858	-4.0498	0.37394	-10.8301	2.48e-27	1.26e-24	RTL1
ENSG00000254665.1	342.204	-1.33971	0.313899	-4.26796	1.97e-05	0.000240156	RP11-152H18.3
ENSG00000254681.6	880.081	-1.12935	0.211901	-5.32959	9.84e-08	2.24e-06	PKD1P5
ENSG00000254715.3	16.4004	-1.24263	0.374671	-3.3166	0.0009112	0.00595668	OR7E154P
ENSG00000254744.3	4.91093	-2.57691	0.387664	-6.64727	2.99e-11	1.44e-09	CTD-3076O17.1
ENSG00000254829.1	147.394	-2.07242	0.439026	-4.72049	2.35e-06	3.76e-05	RP11-7I15.3
ENSG00000254832.1	1.99049	-3.84372	0.778256	-4.9389	7.86e-07	1.43e-05	OR4A40P
ENSG00000254847.1	4.57325	-1.00303	0.210268	-4.77023	1.84e-06	3.04e-05	RP11-51B23.3
ENSG00000254855.1	22.8281	-2.79894	0.306673	-9.12677	7.06e-20	1.4e-17	RP11-867G23.1
ENSG00000254932.2	0.729937	-1.10529	0.434915	-2.5414	0.0110411	0.0430426	RP11-687M24.8
ENSG00000254967.6	2.1147	-1.47179	0.362524	-4.05984	4.91e-05	0.000524973	RP11-680F20.6
ENSG00000255008.2	1.23619	-2.03812	0.464876	-4.38422	1.16e-05	0.000152386	AP000442.4
ENSG00000255042.1	1.43608	-2.92724	0.999844	-2.9277	0.00341483	0.0170997	RP11-347H15.5
ENSG00000255091.1	1.6564	1.00649	0.247212	4.07137	4.67e-05	0.0005034	RP11-495O11.1
ENSG00000255114.1	210.661	-3.7701	0.429459	-8.77871	1.65e-18	2.73e-16	RP11-110I1.6
ENSG00000255126.1	93.413	-2.80299	0.582276	-4.81385	1.48e-06	2.51e-05	CTD-2531D15.5
ENSG00000255136.2	1.20959	-1.00126	0.383317	-2.61209	0.00899916	0.0367453	CTD-2562J17.4
ENSG00000255176.1	16.0088	-1.30485	0.220452	-5.91897	3.24e-09	1.03e-07	AP002954.3
ENSG00000255201.1	33.2706	-1.06004	0.218736	-4.84621	1.26e-06	2.17e-05	RP11-350N15.4
ENSG00000255248.6	3296.72	-1.30593	0.192696	-6.77714	1.23e-11	6.37e-10	RP11-166D19.1
ENSG00000255301.1	1.23134	-2.19088	0.662895	-3.30502	0.000949687	0.00614702	RP11-624G17.3
ENSG00000255328.1	7.88392	-1.1848	0.240295	-4.93063	8.2e-07	1.48e-05	RP11-326C3.12
ENSG00000255390.1	129.922	-1.54192	0.203618	-7.5726	3.66e-14	2.92e-12	RP11-732A19.5
ENSG00000255394.4	57.0062	-2.5846	0.405807	-6.36905	1.9e-10	7.93e-09	C8orf49
ENSG00000255404.1	3.89614	-1.49865	0.470473	-3.18541	0.00144548	0.00858556	RP11-770G2.5
ENSG00000255438.2	5.85041	-1.69821	0.315824	-5.37706	7.57e-08	1.77e-06	CTD-2653D5.1
ENSG00000255445.1	5.35299	-1.22403	0.282051	-4.33973	1.43e-05	0.000181436	RP11-573M3.3
ENSG00000255498.1	51.1765	-3.6179	0.415214	-8.71335	2.95e-18	4.72e-16	RP11-618K13.2
ENSG00000255504.2	3.5026	-2.19448	0.441835	-4.96674	6.81e-07	1.25e-05	RP11-788M5.3
ENSG00000255548.1	1.86031	-3.15479	0.58333	-5.40825	6.36e-08	1.52e-06	RP11-617B3.2
ENSG00000255629.1	22.1248	-1.26567	0.242783	-5.21318	1.86e-07	3.95e-06	RP11-196H14.3
ENSG00000255815.3	5.43272	-1.19568	0.256352	-4.66422	3.1e-06	4.81e-05	KRT8P11
ENSG00000255833.1	32.7907	1.04013	0.267586	3.8871	0.000101451	0.000966372	TIFAB
ENSG00000255837.1	27.674	-1.23501	0.200639	-6.15538	7.49e-10	2.72e-08	TAS2R20
ENSG00000255909.1	0.529641	-1.05314	0.349463	-3.01359	0.00258175	0.0136494	PDCD5P1
ENSG00000255986.6	3.45818	-1.90393	0.403146	-4.72267	2.33e-06	3.73e-05	MT1JP
ENSG00000256007.1	94.5446	-1.61606	0.499527	-3.23518	0.00121567	0.00748245	ARAP1-AS1
ENSG00000256040.2	15.5829	-1.05748	0.252929	-4.18091	2.9e-05	0.00033687	PAPPA-AS1
ENSG00000256162.2	3.30879	-1.64034	0.399432	-4.10667	4.01e-05	0.000444261	SMLR1
ENSG00000256338.2	132.086	-2.41045	0.208865	-11.5407	8.23e-31	6.96e-28	RPL41P2
ENSG00000256350.1	1.20428	-1.38423	0.543367	-2.54751	0.0108495	0.04248	AE000658.30
ENSG00000256463.8	1.42993	-1.53584	0.592983	-2.59003	0.00959688	0.0386082	SALL3
ENSG00000256508.2	18.4479	-3.5366	0.367602	-9.62072	6.54e-22	1.65e-19	MRGPRF-AS1
ENSG00000256569.1	5.39738	1.41007	0.511453	2.75699	0.00583353	0.0260831	RP11-173P15.5
ENSG00000256674.1	1.30038	-2.23679	0.448586	-4.9863	6.15e-07	1.14e-05	RP11-172C16.4
ENSG00000256725.1	1.38462	1.14571	0.337878	3.3909	0.000696627	0.00480442	RP11-662M24.2
ENSG00000256812.1	2.10493	-1.49247	0.309567	-4.82116	1.43e-06	2.43e-05	CAPNS2
ENSG00000256813.1	6.86459	-5.0313	1.135	-4.43288	9.3e-06	0.000125915	RP11-804A23.4
ENSG00000256870.2	18.6861	-5.0493	0.583072	-8.65982	4.73e-18	7.29e-16	SLC5A8
ENSG00000256894.1	83.0136	1.10523	0.210879	5.24107	1.6e-07	3.45e-06	RP11-283G6.3
ENSG00000256973.1	8.09069	-1.44238	0.312113	-4.62134	3.81e-06	5.81e-05	RP11-359J14.2
ENSG00000256995.6	1.13054	-1.39109	0.3981	-3.49432	0.000475273	0.00350001	RP11-114G22.1
ENSG00000257017.8	5016.92	1.30031	0.303917	4.27851	1.88e-05	0.000230364	HP
ENSG00000257096.1	4.00128	-1.70234	0.61642	-2.76166	0.00575085	0.0257573	AE000658.22
ENSG00000257138.1	1.91131	1.10937	0.37951	2.92316	0.00346503	0.0173003	TAS2R38
ENSG00000257151.1	348.894	-1.07864	0.195107	-5.52844	3.23e-08	8.25e-07	PWAR6
ENSG00000257259.1	6.60843	-3.28255	0.46715	-7.02676	2.11e-12	1.25e-10	RP11-767I20.1
ENSG00000257342.1	317.001	-2.44102	0.60205	-4.05451	5.02e-05	0.000534859	RP11-571M6.7
ENSG00000257386.1	41.1757	1.45617	0.343116	4.24397	2.2e-05	0.000264674	RP11-56G10.2
ENSG00000257411.1	188.043	1.01472	0.344839	2.94258	0.00325487	0.0164398	RP11-603J24.9
ENSG00000257524.5	136.06	-1.26366	0.201771	-6.26283	3.78e-10	1.46e-08	RP11-203J24.9
ENSG00000257607.1	38.2228	-1.37309	0.472692	-2.90482	0.00367467	0.0181163	RP11-449P15.1
ENSG00000257663.1	223.533	-1.23831	0.252336	-4.90739	9.23e-07	1.65e-05	RP11-1100L3.7
ENSG00000257743.8	22.6881	1.33993	0.266924	5.01987	5.17e-07	9.78e-06	MGAM2
ENSG00000257764.2	11.3528	-2.75533	0.557299	-4.94409	7.65e-07	1.39e-05	RP11-1143G9.4
ENSG00000257773.1	11.4525	-1.17729	0.191512	-6.14735	7.88e-10	2.85e-08	ST13P3
ENSG00000257894.2	115.723	-1.82638	0.229276	-7.96585	1.64e-15	1.69e-13	RP1-78O14.1
ENSG00000258017.1	389.044	-1.35166	0.307057	-4.40198	1.07e-05	0.000142209	RP11-386G11.10
ENSG00000258024.1	2.25296	-1.00864	0.324707	-3.10632	0.00189435	0.0106578	OR5BT1P
ENSG00000258064.1	18.7806	1.25391	0.339632	3.69197	0.000222523	0.00187083	RP11-293I14.2
ENSG00000258240.5	2.86487	-1.75542	0.659639	-2.66119	0.0077866	0.0327185	RP1-46F2.3
ENSG00000258274.1	4.53906	-1.68426	0.337387	-4.99208	5.97e-07	1.11e-05	RP11-887P2.5
ENSG00000258388.7	477.189	-1.32903	0.18272	-7.27358	3.5e-13	2.37e-11	PPT2-EGFL8
ENSG00000258399.6	36.6311	-3.32956	0.339203	-9.81584	9.62e-23	2.61e-20	MEG8
ENSG00000258489.3	4.18903	-2.8358	0.471294	-6.01705	1.78e-09	5.99e-08	RP11-398J10.2
ENSG00000258498.6	2199.47	-5.03904	0.342407	-14.7165	5.05e-49	8.61e-45	DIO3OS
ENSG00000258504.2	44.105	-2.19141	0.593168	-3.69442	0.000220391	0.00185966	RP11-638I2.6
ENSG00000258529.5	2.51585	1.72582	0.687107	2.51172	0.0120144	0.0459288	RP11-108O10.8
ENSG00000258535.1	0.900705	-1.14711	0.370642	-3.09493	0.00196857	0.0109902	RP11-280K24.4
ENSG00000258537.5	4.95967	-4.1023	0.571503	-7.17809	7.07e-13	4.56e-11	FRMD6-AS2
ENSG00000258633.1	1.28152	-1.03295	0.316354	-3.26518	0.00109395	0.00688159	RP11-857B24.1
ENSG00000258636.1	2.61336	-1.14813	0.316628	-3.62612	0.000287708	0.00232119	CTD-2298J14.2
ENSG00000258677.2	43.5201	1.19698	0.312164	3.83446	0.000125842	0.00115672	RP11-463D19.2
ENSG00000258679.1	27.7215	-4.87103	0.473712	-10.2827	8.44e-25	3.09e-22	RP11-74M13.4
ENSG00000258752.1	31.1775	-1.75926	0.36795	-4.78123	1.74e-06	2.89e-05	RP11-356K23.1
ENSG00000258761.1	1.19954	-1.65832	0.532952	-3.11157	0.00186093	0.0105114	RP11-24J19.1
ENSG00000258803.1	0.638938	-1.16392	0.442051	-2.63299	0.00846361	0.0349265	RP11-624J12.1
ENSG00000258808.1	0.783451	-1.92084	0.744064	-2.58155	0.00983583	0.0393283	RP11-255G12.3
ENSG00000258818.3	1174.14	-1.78065	0.20915	-8.51373	1.68e-17	2.37e-15	RNASE4
ENSG00000258893.1	0.74642	-1.89222	0.562022	-3.36681	0.000760426	0.00515684	SETP2
ENSG00000258925.2	0.905194	-1.26745	0.388156	-3.26531	0.00109346	0.00688159	NPM1P5
ENSG00000258932.5	7.88893	1.08461	0.39789	2.7259	0.00641258	0.0280687	CTD-3006G17.2
ENSG00000258985.1	10.4318	-1.01302	0.202866	-4.99356	5.93e-07	1.11e-05	RP11-368P15.3
ENSG00000259001.3	204.942	-1.55691	0.303884	-5.12337	3e-07	6.09e-06	RPPH1
ENSG00000259002.2	0.51305	-1.43987	0.481951	-2.98758	0.00281194	0.0146306	RP11-671J11.7
ENSG00000259018.1	3.16581	-2.31397	0.690522	-3.35104	0.000805091	0.00539961	RP11-124D2.3
ENSG00000259039.1	1.98927	-1.80324	0.333194	-5.41197	6.23e-08	1.5e-06	RP11-409I10.2
ENSG00000259112.1	57.7586	1.13717	0.358891	3.16858	0.00153187	0.00900615	NDUFC2-KCTD14
ENSG00000259132.1	110.748	-1.74316	0.371373	-4.69382	2.68e-06	4.23e-05	RP11-298I3.5
ENSG00000259134.5	112.841	-2.50185	0.279122	-8.96327	3.15e-19	5.76e-17	LINC00924
ENSG00000259171.1	448.985	-1.28754	0.245021	-5.25484	1.48e-07	3.23e-06	RP11-903H12.5
ENSG00000259176.5	0.917005	-1.44272	0.581499	-2.48105	0.0130998	0.0489928	RP11-69H14.6
ENSG00000259211.1	5.22987	-1.6662	0.279883	-5.95319	2.63e-09	8.55e-08	RP11-64K12.8
ENSG00000259236.1	1.1013	-1.4336	0.416183	-3.44463	0.000571832	0.0040807	GOLGA8VP
ENSG00000259244.1	55.7876	-2.00072	0.242702	-8.24352	1.67e-16	2.02e-14	RP11-182J1.12
ENSG00000259275.2	168.922	-2.22228	0.231194	-9.6122	7.1e-22	1.78e-19	RP11-522B15.3
ENSG00000259285.1	1.17448	-1.12039	0.38509	-2.90944	0.0036208	0.0179366	CTD-2330J20.2
ENSG00000259295.6	809.275	-1.65301	0.199834	-8.27192	1.32e-16	1.64e-14	CSPG4P12
ENSG00000259324.1	1.41508	-3.04119	0.639668	-4.75433	1.99e-06	3.26e-05	OR11K1P
ENSG00000259341.1	3.27724	1.12396	0.270832	4.15002	3.32e-05	0.000379274	RP11-20G13.1
ENSG00000259356.1	1.10923	-1.19201	0.355805	-3.35018	0.00080759	0.00540893	RP11-90E5.1
ENSG00000259357.2	54.0031	-1.19458	0.242427	-4.92759	8.33e-07	1.5e-05	RP11-316M1.12
ENSG00000259359.1	4.82382	-2.01604	0.32087	-6.28303	3.32e-10	1.31e-08	RP11-327J17.2
ENSG00000259384.6	13.9624	-3.91554	0.414782	-9.43999	3.73e-21	8.59e-19	GH1
ENSG00000259433.2	5.02803	-2.9531	0.496338	-5.94979	2.68e-09	8.69e-08	CTD-2651B20.4
ENSG00000259462.2	21.6522	-2.19222	0.299918	-7.30941	2.68e-13	1.84e-11	CPEB1-AS1
ENSG00000259467.1	0.493766	-1.08708	0.336852	-3.22718	0.00125018	0.00764385	NDUFAF4P1
ENSG00000259498.1	67.581	-1.33362	0.206066	-6.47178	9.69e-11	4.26e-09	RP11-244F12.3
ENSG00000259511.1	7.63102	-1.35255	0.249948	-5.41131	6.26e-08	1.5e-06	UBE2Q2L
ENSG00000259565.2	1.24914	-1.17303	0.394654	-2.9723	0.00295581	0.0151986	KRT8P23
ENSG00000259605.3	549.346	-1.14354	0.148829	-7.68357	1.55e-14	1.33e-12	AC074212.5
ENSG00000259614.2	4.94998	-4.02343	0.525818	-7.65175	1.98e-14	1.67e-12	RP11-522B15.6
ENSG00000259658.3	42.8672	-1.83378	0.233112	-7.86651	3.65e-15	3.45e-13	RP11-89K11.1
ENSG00000259660.2	38.6479	-3.25142	0.327951	-9.91437	3.61e-23	1.03e-20	DNM1P47
ENSG00000259661.1	205.956	-1.10781	0.174206	-6.35919	2.03e-10	8.42e-09	AC068831.15
ENSG00000259683.1	24.7975	-2.72998	0.292554	-9.33152	1.04e-20	2.25e-18	RP11-182J1.14
ENSG00000259684.1	2.60045	-1.80926	0.609098	-2.97039	0.00297418	0.0152743	RP11-120K9.2
ENSG00000259719.5	1.12259	-1.5874	0.431947	-3.67498	0.000237869	0.00197612	RP11-930O11.1
ENSG00000259744.1	4.01806	-1.05456	0.257177	-4.10054	4.12e-05	0.000452684	RP11-138H8.6
ENSG00000259763.1	0.963272	-1.93103	0.519329	-3.71832	0.000200555	0.00171672	RP11-327J17.1
ENSG00000259792.1	1.94574	-3.3624	0.822395	-4.08854	4.34e-05	0.000472629	RP11-114H24.6
ENSG00000259847.1	21.3458	-3.65244	0.393321	-9.28616	1.6e-20	3.41e-18	RP11-95H3.1
ENSG00000259884.1	210.423	-3.52156	0.309624	-11.3736	5.66e-30	4.11e-27	RP11-1100L3.8
ENSG00000259905.5	41.3472	-3.61998	0.483299	-7.49014	6.88e-14	5.17e-12	PWRN1
ENSG00000259910.1	1.4076	-1.81261	0.400809	-4.52238	6.11e-06	8.76e-05	RP11-616M22.2
ENSG00000259946.1	0.835164	-1.7397	0.699516	-2.48701	0.0128822	0.0483948	RP11-490G2.2
ENSG00000259948.2	137.119	-1.16191	0.207574	-5.59759	2.17e-08	5.79e-07	RP11-326A19.5
ENSG00000259969.1	55.1066	-1.13096	0.197065	-5.73902	9.52e-09	2.72e-07	RP11-999E24.3
ENSG00000259976.1	794.524	-1.24193	0.165585	-7.50027	6.37e-14	4.83e-12	RP11-553L6.5
ENSG00000260011.2	1.63979	-1.06063	0.322646	-3.28728	0.00101159	0.00646794	RP13-20L14.1
ENSG00000260060.1	6.25896	-1.04532	0.186645	-5.6006	2.14e-08	5.7e-07	RP11-388M20.1
ENSG00000260082.1	6.11027	-1.1276	0.262839	-4.29006	1.79e-05	0.000220844	RP11-2C24.5
ENSG00000260107.1	23.1276	-4.01465	0.584897	-6.86386	6.7e-12	3.66e-10	AC005606.15
ENSG00000260170.1	5.19439	1.53755	0.616309	2.49477	0.0126037	0.0476002	RP11-96O20.4
ENSG00000260230.2	504.106	-1.35687	0.2546	-5.32942	9.85e-08	2.24e-06	FRRS1L
ENSG00000260246.1	16.2813	-1.04985	0.250956	-4.18342	2.87e-05	0.000333856	AC000032.2
ENSG00000260252.1	6.02007	-3.46149	0.596186	-5.80606	6.4e-09	1.9e-07	RP11-384M15.3
ENSG00000260266.1	52.313	-1.61121	0.298022	-5.40634	6.43e-08	1.53e-06	CTD-2311M21.2
ENSG00000260287.4	7.45926	-2.7299	0.848415	-3.21765	0.00129248	0.00785456	TBC1D3G
ENSG00000260296.1	56.7775	-1.18398	0.197706	-5.98861	2.12e-09	7.05e-08	RP11-395I6.3
ENSG00000260305.1	0.953254	-2.29463	0.63403	-3.61912	0.000295607	0.00237258	NTRK3-AS1
ENSG00000260306.1	58.457	-1.50332	0.203095	-7.40204	1.34e-13	9.55e-12	RP11-645C24.5
ENSG00000260403.1	1.66413	-1.76056	0.424123	-4.15105	3.31e-05	0.000378071	RP11-616M22.1
ENSG00000260413.1	9.656	-1.9467	0.392695	-4.95727	7.15e-07	1.31e-05	RP11-231C14.6
ENSG00000260425.1	1.30472	-3.23799	0.938587	-3.44986	0.000560884	0.00401434	LA16c-316G12.2
ENSG00000260465.1	329.09	-1.48615	0.199592	-7.44593	9.63e-14	7.02e-12	RP11-63M22.2
ENSG00000260479.1	0.731436	-1.29076	0.45244	-2.85288	0.00433256	0.0205969	RP11-556H2.3
ENSG00000260482.3	1.20032	-1.12195	0.425051	-2.63957	0.00830124	0.0343762	CTD-2196E14.9
ENSG00000260484.1	11.6683	-1.39127	0.347477	-4.00391	6.23e-05	0.000644802	RP11-1081M5.2
ENSG00000260534.1	70.3349	-1.23272	0.290006	-4.25069	2.13e-05	0.000257695	RP11-1006G14.4
ENSG00000260548.1	3.01479	-2.18695	0.415841	-5.25909	1.45e-07	3.16e-06	RP6-24A23.6
ENSG00000260551.1	1.12333	-1.97424	0.560571	-3.52183	0.00042858	0.00322437	PWRN2
ENSG00000260563.3	167.447	-1.51933	0.162621	-9.34276	9.39e-21	2.05e-18	RP13-516M14.1
ENSG00000260566.2	15.5467	-1.74255	0.612561	-2.84469	0.00444543	0.0210375	RP11-20G6.3
ENSG00000260570.1	24.913	-5.4271	0.672841	-8.06595	7.27e-16	7.95e-14	RP11-24N18.1
ENSG00000260577.2	262.652	-1.60821	0.232549	-6.91559	4.66e-12	2.61e-10	RP11-615I2.2
ENSG00000260597.1	50.0042	-2.27578	0.308431	-7.37856	1.6e-13	1.13e-11	AC012531.25
ENSG00000260613.1	3.83532	-1.02571	0.253166	-4.05152	5.09e-05	0.000540059	RP3-522J7.6
ENSG00000260641.1	22.4727	-1.44811	0.241631	-5.99307	2.06e-09	6.87e-08	RP11-1299A16.3
ENSG00000260645.1	60.8789	-1.55718	0.220911	-7.04892	1.8e-12	1.08e-10	RP11-250B2.5
ENSG00000260706.5	0.929629	-2.04931	0.797634	-2.56923	0.0101923	0.0404666	RP11-525K10.1
ENSG00000260729.1	195.171	-1.01952	0.211903	-4.81128	1.5e-06	2.54e-05	RP11-106M3.2
ENSG00000260755.1	1.55275	-3.2779	1.15654	-2.83424	0.00459342	0.0216059	RP11-403P17.3
ENSG00000260760.1	3.33623	-2.65126	0.575188	-4.60937	4.04e-06	6.1e-05	PWRN3
ENSG00000260799.1	2.47177	-1.08247	0.294978	-3.66967	0.000242863	0.00201027	KRT8P50
ENSG00000260802.1	13.7071	-2.67261	0.357225	-7.48157	7.34e-14	5.46e-12	LINC00890
ENSG00000260807.6	34.2311	-1.18634	0.200832	-5.90712	3.48e-09	1.09e-07	RP11-161M6.2
ENSG00000260828.1	0.650215	1.22416	0.309811	3.9513	7.77e-05	0.00077626	HMGB3P32
ENSG00000260844.2	2.9448	-2.06488	0.431841	-4.78158	1.74e-06	2.89e-05	RP11-578F21.9
ENSG00000260859.1	0.970923	-2.3281	0.524943	-4.43496	9.21e-06	0.000125098	RP11-254F19.2
ENSG00000260876.5	10.8815	-2.65991	0.351155	-7.57474	3.6e-14	2.87e-12	LINC01229
ENSG00000260934.1	53.2161	-3.34731	0.686896	-4.8731	1.1e-06	1.92e-05	CTA-363E6.7
ENSG00000260947.1	4.18046	-1.83473	0.385624	-4.75783	1.96e-06	3.21e-05	RP11-384P7.7
ENSG00000260973.1	1.98411	-1.79559	0.541141	-3.31815	0.000906155	0.00592824	RP11-105C19.2
ENSG00000261011.1	74.5752	-1.52057	0.220317	-6.90175	5.14e-12	2.85e-10	RP11-96C23.11
ENSG00000261026.1	12.1592	-1.05835	0.282821	-3.74211	0.000182484	0.00158189	CTD-3247F14.2
ENSG00000261051.1	46.4027	-1.41562	0.195346	-7.24674	4.27e-13	2.87e-11	RP11-274H2.5
ENSG00000261063.1	1.91388	-3.41978	0.828068	-4.12983	3.63e-05	0.000408824	RP11-538I12.2
ENSG00000261065.1	1.77505	-2.274	0.756092	-3.00758	0.00263338	0.0138686	RP11-74C13.4
ENSG00000261083.1	1.11792	-1.2016	0.352258	-3.41115	0.000646906	0.00452185	RP11-93I21.3
ENSG00000261114.1	38.6366	-1.48349	0.215879	-6.87189	6.34e-12	3.46e-10	RP11-325K4.2
ENSG00000261247.1	10.4194	-1.55385	0.374562	-4.14844	3.35e-05	0.000381509	GOLGA8T
ENSG00000261257.1	1.54811	-1.19382	0.349895	-3.41193	0.000645036	0.00451155	RP11-673E11.2
ENSG00000261292.2	25.3397	-1.34074	0.293991	-4.56047	5.1e-06	7.47e-05	RP11-389G6.3
ENSG00000261317.1	15.1453	-3.22	0.794196	-4.05441	5.03e-05	0.000534877	RP11-566K11.5
ENSG00000261319.1	4.7897	-1.74618	0.390267	-4.47433	7.67e-06	0.000106763	RP11-279O17.1
ENSG00000261366.1	41.7139	-1.00664	0.173755	-5.79345	6.9e-09	2.04e-07	MANEA-AS1
ENSG00000261379.1	6.0713	-2.46494	0.379366	-6.49752	8.17e-11	3.65e-09	RP11-395N3.1
ENSG00000261385.1	3.36908	-1.77588	0.467667	-3.79733	0.000146266	0.00131331	RP11-388M20.2
ENSG00000261390.5	14.6759	-1.04402	0.211877	-4.92749	8.33e-07	1.5e-05	MAFTRR
ENSG00000261409.1	145.63	-4.06212	0.363545	-11.1736	5.49e-29	3.17e-26	RP6-24A23.7
ENSG00000261480.1	2.61622	-2.3933	0.415877	-5.75483	8.67e-09	2.5e-07	RP11-578F21.6
ENSG00000261490.1	167.187	-1.39928	0.181952	-7.69036	1.47e-14	1.26e-12	RP11-448G15.3
ENSG00000261496.1	13.4316	-1.67426	0.27295	-6.13397	8.57e-10	3.08e-08	RP13-514E23.1
ENSG00000261505.1	319.203	-1.06667	0.170878	-6.24231	4.31e-10	1.65e-08	LA16c-358B7.3
ENSG00000261520.5	5.43732	-1.83152	0.48397	-3.78436	0.000154106	0.00137179	DLGAP1-AS5
ENSG00000261554.1	3.2163	-2.6979	0.508129	-5.30947	1.1e-07	2.47e-06	RP11-810K23.10
ENSG00000261556.8	139.815	-1.22714	0.176371	-6.95769	3.46e-12	1.99e-10	SMG1P7
ENSG00000261568.1	16.9598	-1.09382	0.276015	-3.96289	7.4e-05	0.000744401	RP11-524C21.2
ENSG00000261621.1	0.821332	-1.36711	0.534691	-2.55683	0.010563	0.0416117	RP11-580I1.2
ENSG00000261641.2	203.759	-1.50071	0.262016	-5.72754	1.02e-08	2.9e-07	LA16c-390E6.5
ENSG00000261646.1	2.67538	-1.59202	0.375653	-4.238	2.26e-05	0.000271347	RP11-489G11.3
ENSG00000261671.1	8.06167	-1.08856	0.205683	-5.29242	1.21e-07	2.69e-06	RP11-573G6.6
ENSG00000261672.1	5.36189	-3.14461	0.485783	-6.47328	9.59e-11	4.22e-09	RP11-475B2.1
ENSG00000261684.1	88.0991	-1.08181	0.334916	-3.23008	0.00123755	0.00758429	RP11-265N6.1
ENSG00000261707.1	3.84613	-1.0217	0.280844	-3.63798	0.000274782	0.00222956	RP11-264M12.2
ENSG00000261713.6	1.11266	-2.10082	0.676649	-3.10475	0.00190442	0.0107003	SSTR5-AS1
ENSG00000261728.1	1.02958	-1.15407	0.425582	-2.71174	0.0066931	0.0289989	RP11-307O13.1
ENSG00000261731.2	1.19184	-2.47864	0.827942	-2.99374	0.00275579	0.0143823	CTD-2358C21.4
ENSG00000261739.2	24.8804	-2.24359	0.2979	-7.53137	5.02e-14	3.87e-12	GOLGA8S
ENSG00000261744.1	8.74023	-1.74094	0.309798	-5.6196	1.91e-08	5.17e-07	RP11-21B21.4
ENSG00000261821.2	125.652	-3.3061	0.332229	-9.95125	2.49e-23	7.39e-21	CTD-2311M21.3
ENSG00000261822.1	47.8154	-1.08501	0.222642	-4.87334	1.1e-06	1.92e-05	RP11-265N6.2
ENSG00000261997.1	42.5794	-1.83248	0.200427	-9.1429	6.08e-20	1.21e-17	RP11-212I21.4
ENSG00000262061.5	210.215	-1.32852	0.24574	-5.40618	6.44e-08	1.53e-06	RP11-1260E13.4
ENSG00000262075.3	10.3969	-1.05283	0.215246	-4.8913	1e-06	1.77e-05	DKFZP434A062
ENSG00000262117.5	2.18436	-1.74736	0.415656	-4.20385	2.62e-05	0.000309405	BCAR4
ENSG00000262118.1	8.89241	-1.79358	0.284399	-6.30655	2.85e-10	1.13e-08	RP11-433P17.3
ENSG00000262223.6	1.13506	-1.27482	0.447424	-2.84924	0.0043824	0.0207969	RP11-1055B8.3
ENSG00000262406.2	175.329	1.45327	0.339828	4.27649	1.9e-05	0.000231801	MMP12
ENSG00000262410.1	65.5633	-2.31899	0.226691	-10.2298	1.46e-24	5.18e-22	RP11-388C12.8
ENSG00000262413.1	159.281	-1.86958	0.432093	-4.3268	1.51e-05	0.000191138	RP11-498C9.3
ENSG00000262429.1	5.49644	-1.97501	0.556563	-3.54858	0.000387311	0.00296956	RP5-1050D4.3
ENSG00000262477.1	51.08	-1.13497	0.159926	-7.09688	1.28e-12	7.84e-11	AC021224.1
ENSG00000262769.1	1.14534	-1.35611	0.438743	-3.0909	0.00199548	0.0110968	RP11-1113L8.1
ENSG00000262791.1	2.52036	-3.0628	0.854843	-3.58288	0.000339833	0.00266597	RP11-961A15.1
ENSG00000262831.1	23.901	-3.24219	0.524848	-6.17738	6.52e-10	2.42e-08	RP11-498C9.2
ENSG00000262855.1	0.805705	-1.62235	0.532108	-3.04892	0.00229668	0.0124392	RP11-46I8.4
ENSG00000262877.4	160.286	-4.23953	0.337672	-12.5552	3.72e-36	6.68e-33	RP11-1055B8.4
ENSG00000262967.1	9.72636	-6.02954	0.72484	-8.31845	8.91e-17	1.12e-14	RP11-294J22.6
ENSG00000263096.1	3.30343	-3.4442	0.462367	-7.44907	9.4e-14	6.88e-12	RP11-515O17.2
ENSG00000263126.1	145.268	-1.05085	0.15282	-6.87638	6.14e-12	3.38e-10	CTC-479C5.10
ENSG00000263164.1	20.8356	-1.07677	0.186826	-5.76353	8.24e-09	2.39e-07	RP11-333E1.2
ENSG00000263165.1	110.072	-1.75025	0.260259	-6.72504	1.76e-11	8.78e-10	RP11-810M2.2
ENSG00000263177.1	6.17973	-1.87176	0.308682	-6.06373	1.33e-09	4.59e-08	RP11-433P17.2
ENSG00000263218.2	5.88603	-5.04072	0.893346	-5.64251	1.68e-08	4.58e-07	CTD-2561B21.7
ENSG00000263272.1	284.144	-1.03962	0.163671	-6.35188	2.13e-10	8.77e-09	CTC-524C5.2
ENSG00000263424.1	14.7164	-1.23806	0.275346	-4.49637	6.91e-06	9.75e-05	CTD-2541J13.2
ENSG00000263426.2	3.61147	-1.77653	0.494038	-3.59595	0.000323216	0.00255806	RN7SL471P
ENSG00000263429.3	7.45393	-1.06205	0.286834	-3.70267	0.000213341	0.00180937	LINC00675
ENSG00000263508.5	3.12163	-1.30056	0.323397	-4.02157	5.78e-05	0.000602699	RP11-963H4.3
ENSG00000263585.1	6.30377	-3.86002	0.680826	-5.66961	1.43e-08	3.96e-07	RP11-498C9.13
ENSG00000263648.1	0.984923	-1.32154	0.397967	-3.32073	0.000897839	0.00588512	RP11-471L13.3
ENSG00000263917.1	1.3106	1.39754	0.497006	2.81192	0.00492463	0.0228239	RP11-53I6.2
ENSG00000263934.4	1753.73	-1.22884	0.232386	-5.28791	1.24e-07	2.74e-06	SNORD3A
ENSG00000263986.1	139.31	-1.94331	0.426552	-4.55586	5.22e-06	7.62e-05	RP11-746M1.1
ENSG00000264012.1	1.87155	-1.49587	0.404904	-3.69439	0.000220415	0.00185966	RP11-627G18.2
ENSG00000264019.1	27.8017	-2.69449	0.517754	-5.20418	1.95e-07	4.13e-06	RP11-6N17.6
ENSG00000264272.1	10.9545	-2.5279	0.515681	-4.90206	9.48e-07	1.68e-05	CTD-2514K5.4
ENSG00000264350.1	4.99675	-1.41234	0.231246	-6.10754	1.01e-09	3.58e-08	SNRPGP2
ENSG00000264443.1	6.56381	1.11871	0.312704	3.57755	0.000346836	0.00271103	RP4-594I10.3
ENSG00000264501.2	20.6441	-1.02958	0.191754	-5.36925	7.91e-08	1.84e-06	RN7SL731P
ENSG00000264727.1	3.06454	-2.08304	0.397721	-5.23745	1.63e-07	3.51e-06	RP11-680C21.1
ENSG00000265018.6	104.576	-1.28624	0.241945	-5.31625	1.06e-07	2.39e-06	CTGLF12P
ENSG00000265073.1	2.83461	-1.32844	0.394456	-3.36778	0.000757752	0.0051428	AC010761.6
ENSG00000265118.5	11.6608	1.13292	0.39865	2.84189	0.00448468	0.0211909	CTD-2370N5.3
ENSG00000265188.1	14.3692	-2.08535	0.419699	-4.96868	6.74e-07	1.24e-05	RP11-835E18.4
ENSG00000265287.2	14.1482	-1.2638	0.275089	-4.59416	4.34e-06	6.48e-05	RP11-192H23.6
ENSG00000265303.1	11.0458	-2.13129	0.616075	-3.45946	0.000541255	0.00389877	CTD-2510F5.6
ENSG00000265401.1	126.682	-3.9704	0.4502	-8.81919	1.15e-18	1.95e-16	RP11-138I1.4
ENSG00000265413.1	23.2657	-1.35938	0.224232	-6.06239	1.34e-09	4.62e-08	RP11-789C17.1
ENSG00000265489.1	11.3691	-2.30022	0.347794	-6.61376	3.75e-11	1.77e-09	RP11-1090M7.1
ENSG00000265511.1	25.8733	-1.18277	0.185094	-6.3901	1.66e-10	6.98e-09	RP11-524F11.1
ENSG00000265728.1	4.00918	1.30232	0.284477	4.57794	4.7e-06	6.94e-05	RP11-883A18.3
ENSG00000265784.1	29.0766	-3.55955	1.05305	-3.38022	0.000724278	0.00495703	RP1-56K13.3
ENSG00000265818.1	2.62625	2.0448	0.795363	2.5709	0.0101435	0.0402942	EEF1E1-BLOC1S5
ENSG00000265840.1	25.9953	-1.58547	0.500454	-3.16806	0.00153461	0.00901448	AC010761.10
ENSG00000266010.1	285.107	-1.95984	0.242875	-8.06936	7.07e-16	7.75e-14	GATA6-AS1
ENSG00000266050.2	3.51568	-3.43842	0.655058	-5.24903	1.53e-07	3.32e-06	RP11-822E23.6
ENSG00000266074.8	826.702	-1.22867	0.207086	-5.93314	2.97e-09	9.49e-08	BAHCC1
ENSG00000266200.6	3.75315	-2.91271	0.476969	-6.10672	1.02e-09	3.59e-08	PNLIPRP2
ENSG00000266302.5	3.18304	-1.25521	0.485839	-2.58359	0.00977769	0.0391693	RP11-219A15.1
ENSG00000266486.1	2.05382	-1.2116	0.387084	-3.13006	0.0017477	0.010001	FAM106CP
ENSG00000266527.1	2.48714	-1.53619	0.37541	-4.09204	4.28e-05	0.000466895	RP11-138P22.1
ENSG00000266677.1	9.37241	-1.00713	0.192554	-5.23035	1.69e-07	3.64e-06	RP11-258F1.1
ENSG00000266708.1	7.82475	-1.07185	0.235951	-4.5427	5.55e-06	8.06e-05	RP11-661O13.1
ENSG00000266709.1	17.1927	-1.16659	0.229562	-5.0818	3.74e-07	7.38e-06	RP11-214O1.2
ENSG00000266714.6	5741.37	-1.82137	0.222048	-8.20259	2.35e-16	2.77e-14	MYO15B
ENSG00000266743.1	1.60912	-1.76629	0.519068	-3.40282	0.000666949	0.00463629	RP11-94B19.6
ENSG00000266872.1	53.2791	-3.6399	0.412216	-8.83007	1.05e-18	1.78e-16	RP11-19P22.8
ENSG00000266997.2	31.6614	-1.97834	0.57936	-3.4147	0.000638526	0.0044706	RP11-886H22.1
ENSG00000267007.1	32.5633	-2.47367	0.397262	-6.22681	4.76e-10	1.82e-08	CTB-31O20.3
ENSG00000267042.1	6.96427	-1.66642	0.439975	-3.78752	0.000152157	0.00135932	CTD-3193K9.4
ENSG00000267056.2	16.9459	1.03239	0.245495	4.20534	2.61e-05	0.000307702	AC005336.4
ENSG00000267125.2	9.53853	-5.30161	0.816538	-6.4928	8.43e-11	3.76e-09	CTB-31O20.6
ENSG00000267165.1	119.801	-1.03409	0.249386	-4.14655	3.38e-05	0.000384158	RP11-78A19.3
ENSG00000267206.5	44.8368	-3.93291	0.353964	-11.1111	1.11e-28	6.2e-26	LCN6
ENSG00000267247.1	2.46562	1.39467	0.301119	4.63162	3.63e-06	5.56e-05	RP11-64C12.6
ENSG00000267281.2	133.428	-1.36585	0.180596	-7.56301	3.94e-14	3.11e-12	RP11-793H13.10
ENSG00000267303.1	1535.47	-1.07381	0.188079	-5.70934	1.13e-08	3.2e-07	CTD-2369P2.12
ENSG00000267328.1	95.1903	-2.30179	0.288676	-7.9736	1.54e-15	1.6e-13	AC002398.12
ENSG00000267339.5	1.09462	1.67033	0.405763	4.11653	3.85e-05	0.000429249	LINC00906
ENSG00000267361.1	30.4009	-5.62591	0.609165	-9.23546	2.57e-20	5.38e-18	LOC100421166
ENSG00000267385.1	200.517	-4.30577	0.351251	-12.2584	1.51e-34	2.07e-31	CTB-50L17.14
ENSG00000267436.1	20.3186	-5.73454	0.750821	-7.63768	2.21e-14	1.84e-12	AC005786.7
ENSG00000267439.1	12.1276	-1.02974	0.175337	-5.87293	4.28e-09	1.32e-07	AC002398.11
ENSG00000267441.1	3.16356	-1.21771	0.427579	-2.84791	0.00440071	0.0208635	RP1-37N7.5
ENSG00000267448.5	1.79253	-1.69703	0.459365	-3.69431	0.000220486	0.00185979	AC010649.1
ENSG00000267467.3	1.9109	-1.04375	0.376007	-2.77587	0.00550546	0.0248869	APOC4
ENSG00000267484.1	1.96478	-2.01781	0.60597	-3.32988	0.000868838	0.00573451	CTC-518P12.6
ENSG00000267532.3	202.423	-1.29794	0.184738	-7.02585	2.13e-12	1.26e-10	MIR497HG
ENSG00000267560.1	2.54583	-1.2621	0.335592	-3.76081	0.000169361	0.00148741	RP11-173A16.1
ENSG00000267573.1	0.600908	-1.33596	0.441711	-3.0245	0.00249043	0.0132653	KRT8P5
ENSG00000267576.1	391.543	-1.24049	0.277324	-4.47306	7.71e-06	0.000107227	CTC-510F12.6
ENSG00000267580.1	39.9805	-2.80411	0.506561	-5.53559	3.1e-08	7.96e-07	CTD-2540B15.11
ENSG00000267594.5	15.539	-3.671	0.527802	-6.95526	3.52e-12	2.01e-10	CYP4F24P
ENSG00000267603.1	1.6465	-2.99875	0.555639	-5.39694	6.78e-08	1.6e-06	LINC01028
ENSG00000267632.1	32.0634	-1.22901	0.210333	-5.84319	5.12e-09	1.56e-07	RP11-400F19.18
ENSG00000267636.1	9.0091	-5.18114	0.653556	-7.92761	2.23e-15	2.23e-13	AC008992.1
ENSG00000267653.1	4.15275	-3.1669	0.532946	-5.94226	2.81e-09	9.06e-08	RP1-193H18.3
ENSG00000267662.1	3.72682	-3.97746	0.573108	-6.94017	3.92e-12	2.22e-10	AC007796.1
ENSG00000267696.6	2.52797	1.0076	0.262422	3.83963	0.000123219	0.00113536	CTB-151G24.1
ENSG00000267705.1	4.51053	-4.08975	0.803401	-5.09055	3.57e-07	7.09e-06	RP11-108P20.3
ENSG00000267707.2	23.1047	-1.0937	0.190464	-5.74232	9.34e-09	2.67e-07	RP11-95O2.5
ENSG00000267712.5	3.48612	-2.2769	0.437766	-5.20118	1.98e-07	4.18e-06	LINC01539
ENSG00000267765.1	10.838	-1.90544	0.285759	-6.668	2.59e-11	1.26e-09	CTD-3193K9.3
ENSG00000267769.1	14.578	-1.43441	0.213137	-6.72997	1.7e-11	8.54e-10	CTB-50L17.9
ENSG00000267774.2	17.3273	-3.80837	0.429161	-8.87398	7.06e-19	1.24e-16	RP11-2N1.2
ENSG00000267784.1	8.10298	-2.83361	0.382972	-7.399	1.37e-13	9.75e-12	RP11-171I2.1
[truncated: 377 more rows]

## Sheet: TableS4_Stem_cell_DiffExp_genes
ID	adj.P.Val	P.Value	t	B	logFC	Gene.symbol	Gene.title
1553094_at	0.166	4.95e-06	5.99821	-2.81	2.756	FLJ45513///TAC4	uncharacterized LOC729220///tachykinin 4 (hemokinin)
1565814_at	0.166	6.06e-06	5.91166	-2.83	2.10467	TRIM36	tripartite motif containing 36
224080_at	0.193	1.232e-05	5.60996	-2.92	2.68653
225518_x_at	0.193	1.41e-05	5.55307	-2.93	2.22716	MTHFD1L	methylenetetrahydrofolate dehydrogenase (NADP+ dependent) 1-like
237866_at	0.335	3.065e-05	5.2279	-3.03	2.32509	PID1	phosphotyrosine interaction domain containing 1
241834_at	0.344	3.808e-05	5.1377	-3.06	2.19433	LOC101930404///SNORD116-28///SNORD115-26///SNORD115-13///SNORD115-7///SNORD116-22///SNORD116-4///PWARSN///SNORD107///SNRPN///IPW	uncharacterized LOC101930404///small nucleolar RNA, C/D box 116-28///small nucleolar RNA, C/D box 115-26///small nucleolar RNA, C/D box 115-13///small nucleolar RNA, C/D box 115-7///small nucleolar RNA, C/D box 116-22///small nucleolar RNA, C/D box 116-4///Prader Willi/Angelman region RNA, SNRPN neighbor///small nucleolar RNA, C/D box 107///small nuclear ribonucleoprotein polypeptide N///imprinte…
221328_at	0.344	4.406e-05	5.07719	-3.08	1.74111	CLDN17	claudin 17
201401_s_at	0.388	5.674e-05	4.97251	-3.11	1.99028	GRK2	G protein-coupled receptor kinase 2
223594_at	0.503	8.539e-05	4.80385	-3.17	2.18591	TMEM117	transmembrane protein 117
1553552_at	0.503	9.198e-05	4.77327	-3.18	2.0267	TAAR8	trace amine associated receptor 8
213339_at	0.627	0.00014773	4.57858	-3.25	2.44003	TP73-AS1	TP73 antisense RNA 1
240081_at	0.627	0.00015145	-4.56838	-3.25	-2.05843
234821_at	0.627	0.00017153	4.51731	-3.27	2.45214	LOC101929645	uncharacterized LOC101929645
244125_at	0.627	0.00017526	4.50848	-3.27	2.50452
209083_at	0.627	0.00018102	4.49522	-3.28	2.19949	CORO1A	coronin 1A
235652_at	0.627	0.00018976	-4.47589	-3.28	-1.51264
242154_x_at	0.627	0.00019877	4.45687	-3.29	1.91899	LRR1	leucine rich repeat protein 1
241061_at	0.627	0.00020877	4.43675	-3.3	2.31191
232738_at	0.627	0.00021791	4.4192	-3.31	2.59758	CCSER1	coiled-coil serine rich protein 1
236372_at	0.73	0.00027083	4.3301	-3.34	1.75362	PANX1	pannexin 1
205766_at	0.73	0.00028727	4.30596	-3.35	1.32995	TCAP	titin-cap
244714_at	0.73	0.00029379	4.29676	-3.35	2.57692
202833_s_at	0.74	0.00031118	-4.27321	-3.36	-2.33335	SERPINA1	serpin family A member 1
228094_at	0.786	0.0003574	4.21645	-3.38	1.93316	JAML	junction adhesion molecule like
215891_s_at	0.786	0.00036421	-4.20872	-3.38	-2.6041	GM2A	GM2 ganglioside activator
210525_x_at	0.786	0.00042136	4.14897	-3.41	2.1233	EFCAB11	EF-hand calcium binding domain 11
1563904_at	0.786	0.00044435	4.12719	-3.41	2.1767	LOC100129620	uncharacterized LOC100129620
214250_at	0.786	0.00044703	4.12471	-3.42	3.01438	NUMA1	nuclear mitotic apparatus protein 1
240496_at	0.786	0.00044942	-4.12254	-3.42	-2.29934
1563480_at	0.786	0.00045243	4.11979	-3.42	2.19377
240364_at	0.786	0.00045883	4.11403	-3.42	2.34253
215979_s_at	0.786	0.00052829	4.0562	-3.44	1.88321	SLC7A1	solute carrier family 7 member 1
232741_at	0.786	0.00052937	4.05536	-3.44	1.97678
224010_at	0.786	0.00054592	4.04272	-3.45	2.23829	ANAPC11	anaphase promoting complex subunit 11
243921_at	0.786	0.00056146	4.0312	-3.45	2.14604
215777_at	0.786	0.00056658	4.02747	-3.45	1.37011
219028_at	0.786	0.00057569	4.02092	-3.46	1.19619	HIPK2	homeodomain interacting protein kinase 2
237934_at	0.786	0.00058561	4.01391	-3.46	1.66338
231062_at	0.786	0.00059144	4.00984	-3.46	1.6434	DOCK9-AS2	DOCK9 antisense RNA 2 (head to head)
215676_at	0.786	0.00059963	4.00419	-3.46	1.37695	BRF1	BRF1, RNA polymerase III transcription initiation factor 90 kDa subunit
211522_s_at	0.786	0.00061859	3.99141	-3.47	2.56162	GNRHR	gonadotropin releasing hormone receptor
1566715_at	0.786	0.00062292	3.98854	-3.47	2.16954
1569746_s_at	0.786	0.00062655	-3.98616	-3.47	-1.37627	OSER1-AS1	OSER1 antisense RNA 1 (head to head)
1559295_at	0.786	0.00063522	3.98051	-3.47	2.0213
1566272_at	0.786	0.00064721	3.97282	-3.47	2.31318	RALGAPA1	Ral GTPase activating protein catalytic alpha subunit 1
1555816_at	0.843	0.00070921	3.93522	-3.49	2.26496	THSD4	thrombospondin type 1 domain containing 4
1555412_at	0.862	0.00074109	3.91714	-3.5	2.10679	FBXL21	F-box and leucine rich repeat protein 21 (gene/pseudogene)
221359_at	0.862	0.00076366	3.90479	-3.5	1.78525	GDNF	glial cell derived neurotrophic factor
1556388_a_at	0.862	0.00078621	3.89281	-3.51	1.82042	LOC100507389	uncharacterized LOC100507389
220902_at	0.862	0.0007882	3.89178	-3.51	1.99124
224011_at	0.866	0.00080817	3.88148	-3.51	1.66074
1570422_at	0.893	0.00086405	3.85394	-3.52	1.50923	SNTG2	syntrophin gamma 2
239239_at	0.893	0.00086597	-3.85303	-3.52	-1.49437	BANCR	BRAF-activated non-protein coding RNA
1557642_at	0.893	0.00088222	3.84536	-3.52	2.38666	IQCA1	IQ motif containing with AAA domain 1
228380_at	0.898	0.00090522	3.83476	-3.53	1.2211	SENP2	SUMO1/sentrin/SMT3 specific peptidase 2
1563299_at	0.898	0.00092026	3.82797	-3.53	2.11636
1557067_s_at	0.922	0.00096174	-3.80979	-3.54	-1.1656	LUC7L	LUC7 like
241365_at	0.922	0.000992	3.79701	-3.54	2.09793	SATB1	SATB homeobox 1
1570141_at	0.922	0.00099574	3.79546	-3.54	1.54197	MYO5B	myosin VB
210548_at	0.922	0.0010251	3.78347	-3.55	1.89693	CCL23	C-C motif chemokine ligand 23
231164_at	0.922	0.00104054	3.7773	-3.55	1.65212	ABCA17P	ATP binding cassette subfamily A member 17, pseudogene
234455_at	0.922	0.00104535	3.77539	-3.55	2.11755	ZFP1	ZFP1 zinc finger protein
210888_s_at	0.932	0.00109407	3.75658	-3.56	1.69407	ITIH1	inter-alpha-trypsin inhibitor heavy chain 1
1558846_at	0.932	0.00112428	-3.74533	-3.56	-2.56427	PNLIPRP3	pancreatic lipase related protein 3
217123_x_at	0.932	0.00112512	3.74502	-3.56	2.29161	PMCHL1	pro-melanin concentrating hormone like 1 (pseudogene)
237962_x_at	0.932	0.00113641	3.74089	-3.57	1.80891
221148_at	0.932	0.00114257	3.73866	-3.57	1.64663
244819_x_at	0.954	0.00121292	3.71395	-3.58	2.03822	PSPH	phosphoserine phosphatase
224403_at	0.954	0.00121438	3.71346	-3.58	2.30274	FCRL4	Fc receptor like 4
215119_at	0.954	0.00122191	-3.7109	-3.58	-2.59409	MYO16	myosin XVI
1558748_at	0.959	0.00127093	3.69462	-3.59	2.03007
220286_at	0.959	0.00128089	-3.69139	-3.59	-1.68109	MTMR10	myotubularin related protein 10
243132_at	0.959	0.00128582	-3.6898	-3.59	-1.74582	APTX	aprataxin
243671_at	0.959	0.00129854	3.68573	-3.59	1.71877
1569561_at	0.961	0.00133595	3.67396	-3.59	1.82023
209010_s_at	0.961	0.00134906	-3.66992	-3.6	-1.92696	TRIO	trio Rho guanine nucleotide exchange factor
221093_at	0.961	0.00140575	3.65286	-3.6	1.33407	BRD7P3	bromodomain containing 7 pseudogene 3
208307_at	0.961	0.00143803	3.64345	-3.61	2.00766	RBMY1J///RBMY1E///RBMY1D///RBMY1B///RBMY1F///RBMY1A1	RNA binding motif protein, Y-linked, family 1, member J///RNA binding motif protein, Y-linked, family 1, member E///RNA binding motif protein, Y-linked, family 1, member D///RNA binding motif protein, Y-linked, family 1, member B///RNA binding motif protein, Y-linked, family 1, member F///RNA binding motif protein, Y-linked, family 1, member A1
1554032_at	0.961	0.00144051	3.64273	-3.61	1.85227	ARSB	arylsulfatase B
1562946_at	0.961	0.00145552	-3.63843	-3.61	-1.75399
1560698_a_at	0.961	0.0014685	3.63475	-3.61	2.24879	TRHDE-AS1	TRHDE antisense RNA 1
243882_at	0.961	0.00148221	3.6309	-3.61	1.97393
212915_at	0.961	0.00151469	-3.6219	-3.61	-1.53402	PDZRN3	PDZ domain containing ring finger 3
239768_x_at	0.961	0.00162455	3.59283	-3.63	1.2355	GPATCH2	G-patch domain containing 2
1563610_at	0.961	0.00166051	3.58373	-3.63	2.05239	LOC157273	uncharacterized LOC157273
239476_at	0.961	0.00172543	3.56778	-3.64	1.93783
1563704_at	0.961	0.00173291	3.56598	-3.64	2.26323
213669_at	0.961	0.00179232	3.55195	-3.64	1.79094	FCHO1	FCH domain only 1
1568732_at	0.961	0.00182033	3.5455	-3.65	1.84219
1557778_at	0.961	0.00182283	3.54493	-3.65	2.21356	LOC101927967	uncharacterized LOC101927967
229316_at	0.961	0.00184847	3.53911	-3.65	1.62081	KXD1	KxDL motif containing 1
1566688_at	0.961	0.00191108	3.52523	-3.65	1.46068
230334_at	0.961	0.00191511	-3.52435	-3.65	-1.60491	LOC100507291	uncharacterized LOC100507291
215703_at	0.961	0.00194667	3.51754	-3.66	2.02935	CFTR	cystic fibrosis transmembrane conductance regulator
1556749_at	0.961	0.00200824	-3.50456	-3.66	-1.59432
1557886_at	0.961	0.00203131	3.49979	-3.66	2.11765	CEP112	centrosomal protein 112
230682_x_at	0.961	0.00207008	3.4919	-3.67	1.80841	ABCC3	ATP binding cassette subfamily C member 3
1563389_at	0.961	0.00208268	-3.48937	-3.67	-1.4651	TH2LCRR	T helper type 2 locus control region associated RNA
207314_x_at	0.961	0.00209276	3.48735	-3.67	2.04966	KIR3DL2///KIR3DL1	killer cell immunoglobulin like receptor, three Ig domains and long cytoplasmic tail 2///killer cell immunoglobulin like receptor, three Ig domains and long cytoplasmic tail 1
211264_at	0.961	0.00212879	3.48022	-3.67	1.86959	GAD2	glutamate decarboxylase 2
203948_s_at	0.961	0.00213452	3.4791	-3.67	1.49733	MPO	myeloperoxidase
237268_at	0.961	0.00218223	3.46986	-3.68	1.8434	DSCAM	DS cell adhesion molecule
236591_at	0.961	0.00219181	3.46804	-3.68	1.05121	MIR4458///MIR4458HG	microRNA 4458///MIR4458 host gene
240303_at	0.961	0.00220712	-3.46513	-3.68	-1.74932	TMC5	transmembrane channel like 5
223717_s_at	0.961	0.00221193	-3.46422	-3.68	-1.74042	ACRBP	acrosin binding protein
1570337_at	0.961	0.00221837	3.463	-3.68	1.70446	FIGLA	folliculogenesis specific bHLH transcription factor
1570448_at	0.961	0.00223003	3.46081	-3.68	1.78703
1554703_at	0.961	0.00228544	3.45055	-3.69	1.84632	ARHGEF10	Rho guanine nucleotide exchange factor 10
211196_at	0.961	0.00228717	3.45023	-3.69	2.35196	DBT	dihydrolipoamide branched chain transacylase E2
1555462_at	0.961	0.00229212	3.44932	-3.69	1.1837	PPP1R1C	protein phosphatase 1 regulatory inhibitor subunit 1C
214135_at	0.961	0.00231897	3.44445	-3.69	1.35763	CLDN18	claudin 18
229760_at	0.961	0.00234343	3.44006	-3.69	2.06504	VEPH1	ventricular zone expressed PH domain containing 1
240796_at	0.961	0.00235491	3.43802	-3.69	1.64633
244837_at	0.961	0.00236394	3.43641	-3.69	1.64882
1562616_at	0.961	0.00237913	3.43373	-3.69	2.44323
1562970_at	0.961	0.00240003	3.43007	-3.69	1.6924
1569461_at	0.961	0.00241623	-3.42725	-3.69	-1.53978	KCNT1	potassium sodium-activated channel subfamily T member 1
211398_at	0.961	0.00246351	3.41914	-3.7	1.68969	FGFR2	fibroblast growth factor receptor 2
233235_x_at	0.961	0.00248527	3.41545	-3.7	1.24999
220310_at	0.961	0.00250208	3.41263	-3.7	1.80923	TUBAL3	tubulin alpha like 3
223345_at	0.961	0.00255823	3.40332	-3.7	1.66592	HDAC8	histone deacetylase 8
1570592_a_at	0.961	0.00256893	3.40157	-3.71	1.28056
209574_s_at	0.961	0.00257387	3.40077	-3.71	1.93195	LDLRAD4	low density lipoprotein receptor class A domain containing 4
215801_at	0.961	0.00263981	3.39015	-3.71	1.80093
244369_at	0.961	0.00266938	3.38548	-3.71	2.13587	C21orf59	chromosome 21 open reading frame 59
1561199_at	0.961	0.00268381	3.38321	-3.71	1.67689
1557025_a_at	0.961	0.00271094	3.37899	-3.71	1.82773
1563460_at	0.961	0.00274723	3.37341	-3.72	1.88408
232539_at	0.961	0.00275933	-3.37156	-3.72	-1.72503	SOCS2	suppressor of cytokine signaling 2
243758_at	0.961	0.00280134	3.36521	-3.72	1.53988	CFAP100	cilia and flagella associated protein 100
221340_at	0.961	0.00281683	3.36289	-3.72	1.47748	CDX4	caudal type homeobox 4
226737_at	0.961	0.00283027	-3.36089	-3.72	-1.36691	SLC25A42	solute carrier family 25 member 42
239772_x_at	0.961	0.00283229	3.36059	-3.72	1.80528	DHX30	DEAH-box helicase 30
1560833_at	0.961	0.00283557	3.36011	-3.72	1.74037	LOC101927827///LINC01189	uncharacterized LOC101927827///long intergenic non-protein coding RNA 1189
236337_at	0.961	0.00285442	-3.35732	-3.72	-1.3775	SYCP2L	synaptonemal complex protein 2 like
1557692_a_at	0.961	0.00286059	-3.35641	-3.72	-2.24311	GATM	glycine amidinotransferase
239486_at	0.961	0.00292034	-3.34772	-3.73	-1.232	REL	REL proto-oncogene, NF-kB subunit
240102_at	0.961	0.00293403	3.34575	-3.73	2.25504
229123_at	0.961	0.00293789	3.3452	-3.73	1.08642	ZNF224	zinc finger protein 224
205675_at	0.961	0.00295549	3.34268	-3.73	1.83189	MTTP	microsomal triglyceride transfer protein
210190_at	0.961	0.00297254	-3.34026	-3.73	-1.78043	STX11	syntaxin 11
222918_at	0.961	0.00298247	3.33886	-3.73	1.24236	RAB9B	RAB9B, member RAS oncogene family
240295_at	0.961	0.00299375	3.33727	-3.73	1.09348
1566502_at	0.961	0.00299447	3.33717	-3.73	1.43129
229286_at	0.961	0.00306732	3.32705	-3.74	1.86597	MAGEE1	MAGE family member E1
239859_x_at	0.961	0.00310872	3.3214	-3.74	1.91592	ATP5S	ATP synthase, H+ transporting, mitochondrial Fo complex subunit s (factor B)
1552785_at	0.961	0.00312211	3.31959	-3.74	1.94563	ZNF781	zinc finger protein 781
1559458_at	0.961	0.00314642	3.31632	-3.74	2.08486	LTBR	lymphotoxin beta receptor
1561493_at	0.961	0.00315266	3.31548	-3.74	2.29201	LOC105370832	uncharacterized LOC105370832
1560850_at	0.961	0.00326078	-3.30126	-3.75	-2.03305	LOC101926959	uncharacterized LOC101926959
220321_s_at	0.961	0.00334521	3.29047	-3.75	1.13221	CCDC121	coiled-coil domain containing 121
232378_at	0.961	0.00334924	3.28996	-3.75	1.33112	SLC5A9	solute carrier family 5 member 9
1570125_at	0.961	0.00339106	3.28472	-3.75	1.68077	GHET1	gastric carcinoma proliferation enhancing transcript 1
217438_at	0.961	0.00339304	3.28448	-3.75	1.49395
217659_at	0.961	0.00341437	3.28183	-3.76	2.25726
1563671_at	0.961	0.00341617	3.28161	-3.76	1.69098	LACE1	lactation elevated 1
231598_x_at	0.961	0.00343282	3.27955	-3.76	2.33362
239745_at	0.961	0.00343718	-3.27902	-3.76	-1.95701
240494_at	0.961	0.00347532	3.27435	-3.76	1.34186
1557021_s_at	0.961	0.00349682	3.27175	-3.76	1.90757	LOC100507250	uncharacterized LOC100507250
1566771_at	0.961	0.00350377	3.27091	-3.76	1.88473
208385_at	0.961	0.00352473	3.26839	-3.76	1.35571	NR2E3	nuclear receptor subfamily 2 group E member 3
241898_at	0.961	0.00352822	3.26797	-3.76	1.13303	LIPH	lipase H
241316_at	0.961	0.00354939	-3.26544	-3.76	-1.5991
224074_at	0.961	0.00354948	3.26543	-3.76	1.98245	VSX1	visual system homeobox 1
233948_at	0.961	0.00356683	3.26336	-3.76	2.09491	TBX5-AS1	TBX5 antisense RNA 1
1563970_at	0.961	0.00357869	3.26196	-3.76	1.50958	MRPS27	mitochondrial ribosomal protein S27
232674_at	0.961	0.00360235	3.25917	-3.77	2.31377	UCN2	urocortin 2
216634_at	0.961	0.0036084	3.25846	-3.77	1.6625	PLCH1	phospholipase C eta 1
243614_s_at	0.961	0.00361762	3.25738	-3.77	1.57706	PRODH2	proline dehydrogenase 2
1561453_at	0.961	0.00363744	3.25507	-3.77	1.62964
236330_at	0.961	0.00367629	3.25057	-3.77	1.42431
207430_s_at	0.961	0.00368453	3.24963	-3.77	2.07167	MSMB	microseminoprotein beta
210116_at	0.961	0.00373872	3.24344	-3.77	2.05258	SH2D1A	SH2 domain containing 1A
234702_x_at	0.961	0.00373954	3.24335	-3.77	1.93262	CFTR	cystic fibrosis transmembrane conductance regulator
41577_at	0.961	0.00374231	3.24304	-3.77	1.55558	PPP1R16B	protein phosphatase 1 regulatory subunit 16B
230786_at	0.961	0.00374409	-3.24284	-3.77	-1.0738	ZCCHC8	zinc finger CCHC-type containing 8
223593_at	0.961	0.00375225	3.24191	-3.77	1.41466	AADAT	aminoadipate aminotransferase
238046_x_at	0.961	0.00381996	3.23434	-3.78	1.60777	PWWP2B	PWWP domain containing 2B
221608_at	0.961	0.0038315	3.23306	-3.78	2.10603	WNT6	Wnt family member 6
219789_at	0.961	0.00383654	-3.2325	-3.78	-1.38542	NPR3	natriuretic peptide receptor 3
228102_at	0.961	0.00386027	3.22989	-3.78	1.70321
227848_at	0.961	0.00388005	-3.22772	-3.78	-1.54845	PEBP4	phosphatidylethanolamine binding protein 4
220687_at	0.961	0.00388124	3.22759	-3.78	1.55371	LOC101927550	uncharacterized LOC101927550
241289_at	0.961	0.00392723	3.22259	-3.78	1.8577
1563013_at	0.961	0.00393053	3.22224	-3.78	1.51019	LOC646522	uncharacterized LOC646522
1560906_at	0.961	0.00394043	3.22117	-3.78	1.65993
1554680_s_at	0.961	0.00399218	3.21564	-3.78	1.867	KCNS2	potassium voltage-gated channel modifier subfamily S member 2
232699_at	0.961	0.00399406	3.21544	-3.78	1.81299
219341_at	0.961	0.0040709	3.20735	-3.79	1.43771	CLN8	ceroid-lipofuscinosis, neuronal 8
208402_at	0.961	0.00409556	3.20478	-3.79	1.7067	IL17A	interleukin 17A
238957_at	0.961	0.00414425	3.19976	-3.79	1.55954	PDXDC1	pyridoxal dependent decarboxylase domain containing 1
230923_at	0.961	0.00415617	3.19854	-3.79	1.72897	FAM19A1	family with sequence similarity 19 member A1, C-C motif chemokine like
1561592_at	0.961	0.00421656	3.19241	-3.79	1.73193	LOC101928823	uncharacterized LOC101928823
201702_s_at	0.961	0.00422851	-3.19121	-3.79	-1.56056	PPP1R10	protein phosphatase 1 regulatory subunit 10
243482_at	0.961	0.00429586	3.18449	-3.8	1.66333	EPS15L1	epidermal growth factor receptor pathway substrate 15 like 1
203995_at	0.961	0.00434641	-3.17951	-3.8	-1.52511	C21orf2	chromosome 21 open reading frame 2
1553044_at	0.961	0.00435038	3.17912	-3.8	1.39324	GJA10	gap junction protein alpha 10
1565669_at	0.961	0.00436462	3.17773	-3.8	1.42282
234453_s_at	0.961	0.00440486	3.17383	-3.8	1.6302	LRRC74A	leucine rich repeat containing 74A
243146_at	0.961	0.00440822	3.1735	-3.8	2.21079
241449_at	0.961	0.00450059	-3.16467	-3.8	-1.30145
205253_at	0.961	0.00450815	-3.16396	-3.81	-1.65533	PBX1	PBX homeobox 1
237608_at	0.961	0.00454138	3.16083	-3.81	2.16291	LOC101929570	uncharacterized LOC101929570
1562612_at	0.961	0.00455547	3.15951	-3.81	1.57986
216096_s_at	0.961	0.00455777	3.15929	-3.81	1.94595	NRXN1	neurexin 1
230698_at	0.961	0.00460808	3.15461	-3.81	1.94008	CALN1	calneuron 1
220055_at	0.961	0.00465269	3.15051	-3.81	1.94498	ZNF287	zinc finger protein 287
240190_at	0.961	0.00465448	-3.15034	-3.81	-1.80955
241254_at	0.961	0.00468025	3.14799	-3.81	1.99056
228179_at	0.961	0.00469081	-3.14703	-3.81	-1.20505	UTP4///HAS3	UTP4, small subunit processome component///hyaluronan synthase 3
214163_at	0.961	0.00469853	3.14632	-3.81	1.64342	HSPB11	heat shock protein family B (small) member 11
213570_at	0.961	0.00473391	3.14312	-3.81	1.50463	EIF4E2	eukaryotic translation initiation factor 4E family member 2
230305_at	0.961	0.00474122	3.14247	-3.81	1.03555	DNAJC15	DnaJ heat shock protein family (Hsp40) member C15
234398_at	0.961	0.00475203	3.14149	-3.81	1.31448
229278_at	0.961	0.00482267	3.1352	-3.82	1.55637	USP51	ubiquitin specific peptidase 51
1560260_at	0.961	0.00486185	3.13174	-3.82	1.66308	LOC285593	uncharacterized LOC285593
1556827_at	0.961	0.00487541	3.13055	-3.82	1.0837	LPP-AS2	LPP antisense RNA 2
232192_at	0.961	0.00487924	3.13022	-3.82	1.58547	LOC153811///RNF130	uncharacterized LOC153811///ring finger protein 130
1568914_at	0.961	0.0049533	3.12378	-3.82	1.52341	OPN5	opsin 5
236459_at	0.961	0.00497679	-3.12176	-3.82	-1.66306	PRKCE	protein kinase C epsilon
1561065_at	0.961	0.00498245	3.12127	-3.82	1.58397
213071_at	0.961	0.0049826	3.12126	-3.82	1.17461	DPT	dermatopontin
228812_at	0.961	0.005002	-3.1196	-3.82	-1.28536	REL	REL proto-oncogene, NF-kB subunit
1569218_at	0.961	0.00508837	3.11228	-3.83	2.13091	PKIA-AS1	PKIA antisense RNA 1
209830_s_at	0.961	0.00511511	3.11004	-3.83	1.33672	SLC9A3R2	SLC9A3 regulator 2
234802_at	0.961	0.00512272	3.1094	-3.83	1.88729
226179_at	0.961	0.00515063	-3.10708	-3.83	-1.5759	SLC25A37	solute carrier family 25 member 37
238001_at	0.961	0.00516414	3.10596	-3.83	1.47526	KCTD6	potassium channel tetramerization domain containing 6
210450_at	0.961	0.00521823	3.1015	-3.83	1.67602	IGHV5-78	immunoglobulin heavy variable 5-78 (pseudogene)
205579_at	0.961	0.0052234	-3.10107	-3.83	-1.07589	HRH1	histamine receptor H1
231324_at	0.961	0.00529578	3.09518	-3.83	1.30065
238125_at	0.961	0.0053296	3.09245	-3.84	1.33746	ADAMTS16	ADAM metallopeptidase with thrombospondin type 1 motif 16
239001_at	0.961	0.00533596	3.09194	-3.84	1.143	MGST1	microsomal glutathione S-transferase 1
226018_at	0.961	0.00535634	3.09031	-3.84	1.77656	MTURN	maturin, neural progenitor differentiation regulator homolog (Xenopus)
237768_x_at	0.961	0.00542874	3.08455	-3.84	1.1681
1554872_a_at	0.961	0.00543236	3.08427	-3.84	1.38899	HMGCLL1	3-hydroxymethyl-3-methylglutaryl-CoA lyase like 1
211223_at	0.961	0.00550032	3.07894	-3.84	1.75355	PROP1	PROP paired-like homeobox 1
227800_at	0.961	0.00550647	3.07846	-3.84	1.60971	FAM110B	family with sequence similarity 110 member B
207495_at	0.961	0.00553646	3.07613	-3.84	1.47217	RAB28	RAB28, member RAS oncogene family
242473_at	0.961	0.00565848	-3.06677	-3.85	-1.2101	TRAF4	TNF receptor associated factor 4
222860_s_at	0.961	0.00569072	-3.06433	-3.85	-1.4654	PDGFD	platelet derived growth factor D
229848_at	0.961	0.00569814	-3.06377	-3.85	-1.67252	ZNF10	zinc finger protein 10
215572_at	0.961	0.00570843	3.063	-3.85	1.51434
203471_s_at	0.961	0.00571189	3.06274	-3.85	1.6686	PLEK	pleckstrin
1569777_a_at	0.961	0.00571437	3.06255	-3.85	1.76866	ZPLD1	zona pellucida like domain containing 1
241437_s_at	0.961	0.0057189	-3.06221	-3.85	-1.52935	EP400NL	EP400 N-terminal like
1559507_at	0.961	0.00572761	-3.06156	-3.85	-1.44376	LOC100130357	uncharacterized LOC100130357
1560968_at	0.961	0.00577979	3.05766	-3.85	1.44305
230064_at	0.961	0.00579685	3.0564	-3.85	2.00993
233160_at	0.961	0.00579757	3.05634	-3.85	1.85167	DEFB129	defensin beta 129
215112_x_at	0.961	0.00579979	3.05618	-3.85	1.59234	MCF2L2	MCF.2 cell line derived transforming sequence-like 2
208204_s_at	0.961	0.00581597	3.05498	-3.85	1.42415	CAV3	caveolin 3
226132_s_at	0.961	0.00582421	3.05437	-3.85	1.08773	MANEAL	mannosidase endo-alpha like
238549_at	0.961	0.00582633	3.05422	-3.85	1.10065	CBFA2T2	CBFA2/RUNX1 translocation partner 2
1554769_at	0.961	0.00583551	3.05354	-3.85	1.95138	ZNF785	zinc finger protein 785
227505_at	0.961	0.00584824	3.0526	-3.85	1.15321	MED28	mediator complex subunit 28
1570233_at	0.961	0.00586372	3.05147	-3.85	1.85123
216059_at	0.961	0.00587517	3.05063	-3.85	1.13134	PAX3	paired box 3
206226_at	0.961	0.00589934	3.04886	-3.85	1.6784	HRG	histidine rich glycoprotein
207042_at	0.961	0.00591551	3.04769	-3.85	1.71802	E2F2	E2F transcription factor 2
220024_s_at	0.961	0.0059338	3.04636	-3.85	1.77296	PRX	periaxin
1552412_a_at	0.961	0.00596124	3.04437	-3.86	1.973	DEFB106B///DEFB106A	defensin beta 106B///defensin beta 106A
222084_s_at	0.961	0.00597298	3.04353	-3.86	1.79209	SBF1	SET binding factor 1
231311_at	0.961	0.00600352	3.04133	-3.86	1.89936
244718_at	0.961	0.00600441	3.04127	-3.86	1.72763	MTMR9LP	myotubularin related protein 9-like, pseudogene
1556090_at	0.961	0.00601786	-3.04031	-3.86	-1.20959
31637_s_at	0.961	0.00605397	-3.03773	-3.86	-1.23011	NR1D1///THRA	nuclear receptor subfamily 1 group D member 1///thyroid hormone receptor, alpha
220360_at	0.961	0.00606285	-3.0371	-3.86	-1.94651	THAP9	THAP domain containing 9
207958_at	0.961	0.00607534	3.03622	-3.86	1.73427	UGT2A2///UGT2A1	UDP glucuronosyltransferase family 2 member A2///UDP glucuronosyltransferase family 2 member A1 complex locus
220026_at	0.961	0.00607677	3.03611	-3.86	1.66986	CLCA4	chloride channel accessory 4
231214_at	0.961	0.00609591	-3.03476	-3.86	-2.11085
238003_at	0.961	0.00612054	3.03302	-3.86	1.38877	HEPN1///HEPACAM	hepatocellular carcinoma, down-regulated 1///hepatic and glial cell adhesion molecule
218810_at	0.961	0.00613469	-3.03203	-3.86	-1.61308	MIR6732///ZC3H12A	microRNA 6732///zinc finger CCCH-type containing 12A
209777_s_at	0.961	0.00615156	3.03085	-3.86	1.00489	SLC19A1	solute carrier family 19 member 1
1554847_at	0.961	0.00615831	3.03038	-3.86	1.69907	ATP6V1B1	ATPase H+ transporting V1 subunit B1
1555535_at	0.961	0.00618795	3.02831	-3.86	1.19658	BPIFB6	BPI fold containing family B member 6
216886_at	0.961	0.00619134	-3.02807	-3.86	-1.5063	CHRNA4	cholinergic receptor nicotinic alpha 4 subunit
231365_at	0.961	0.0062239	3.02581	-3.86	1.4126	HOXA10-AS///MIR196B	HOXA10 antisense RNA///microRNA 196b
213755_s_at	0.961	0.00623946	3.02474	-3.86	1.52781	SKI	SKI proto-oncogene
211602_s_at	0.961	0.00631023	-3.01987	-3.87	-1.48062	TRPC1	transient receptor potential cation channel subfamily C member 1
241145_at	0.961	0.00633079	3.01847	-3.87	1.36192
226442_at	0.961	0.00637574	3.01542	-3.87	1.98987	ABTB1	ankyrin repeat and BTB domain containing 1
1554565_x_at	0.961	0.00638767	3.01462	-3.87	1.29008	SPPL3	signal peptide peptidase like 3
218790_s_at	0.961	0.00641017	3.0131	-3.87	1.77817	TMLHE	trimethyllysine hydroxylase, epsilon
226418_at	0.961	0.00642294	3.01224	-3.87	1.61777	ERGIC2	ERGIC and golgi 2
220315_at	0.961	0.00644906	3.01049	-3.87	1.5869	PARP11	poly(ADP-ribose) polymerase family member 11
210348_at	0.961	0.00646818	-3.00921	-3.87	-1.14419	2020-09-04	septin 4
207944_at	0.961	0.00651809	3.00589	-3.87	1.49669	OCM2	oncomodulin 2
241245_at	0.961	0.00652283	-3.00558	-3.87	-1.65868	SRSF4	serine and arginine rich splicing factor 4
217038_at	0.961	0.00652654	3.00534	-3.87	1.2717
204722_at	0.961	0.00657604	-3.00207	-3.87	-1.91177	SCN3B	sodium voltage-gated channel beta subunit 3
1560609_at	0.961	0.00658104	3.00175	-3.87	1.73389	CRYZL1	crystallin zeta like 1
215352_at	0.961	0.00658936	3.0012	-3.87	1.5997	GIMAP1-GIMAP5///GIMAP5	GIMAP1-GIMAP5 readthrough///GTPase, IMAP family member 5
239290_at	0.961	0.00662862	2.99863	-3.88	1.20669	FRMPD4	FERM and PDZ domain containing 4
1556155_at	0.961	0.00663246	-2.99838	-3.88	-1.30182	GPR37L1	G protein-coupled receptor 37 like 1
1567878_at	0.961	0.00664845	2.99734	-3.88	1.69013	DEFB114	defensin beta 114
239006_at	0.961	0.0066658	2.99622	-3.88	2.05514	SLC26A7	solute carrier family 26 member 7
1567390_at	0.961	0.00669181	2.99454	-3.88	1.71636
1556743_at	0.961	0.00669532	2.99431	-3.88	1.92851	ZNF654	zinc finger protein 654
210080_x_at	0.961	0.00669886	2.99408	-3.88	1.58206	CELA3A	chymotrypsin like elastase family member 3A
224260_at	0.961	0.00672405	2.99246	-3.88	2.00497
219452_at	0.961	0.00673915	2.99149	-3.88	1.21657	DPEP2	dipeptidase 2
210684_s_at	0.961	0.00676153	2.99006	-3.88	1.36262	DLG4	discs large MAGUK scaffold protein 4
213402_at	0.961	0.00680379	-2.98736	-3.88	-1.4219	ZNF787	zinc finger protein 787
1570107_at	0.961	0.00686582	2.98344	-3.88	1.45163
1554163_at	0.961	0.00686977	-2.98319	-3.88	-1.061	TWIST2	twist family bHLH transcription factor 2
215837_x_at	0.961	0.00688119	2.98247	-3.88	1.9758
234314_at	0.961	0.00691723	2.98021	-3.88	1.33904	RALGAPA2	Ral GTPase activating protein catalytic alpha subunit 2
207921_x_at	0.961	0.00691726	2.98021	-3.88	1.27446	PAX8	paired box 8
232459_at	0.961	0.00692641	2.97964	-3.88	1.74559
238166_s_at	0.961	0.00697611	2.97654	-3.88	1.81886	C17orf51	chromosome 17 open reading frame 51
1552731_at	0.961	0.00700376	2.97483	-3.89	1.9092	ABRA	actin binding Rho activating protein
220392_at	0.961	0.00703651	2.97281	-3.89	1.67054	EBF2	early B-cell factor 2
204492_at	0.961	0.00704444	2.97232	-3.89	1.60072	ARHGAP11A	Rho GTPase activating protein 11A
220122_at	0.961	0.00708092	-2.97009	-3.89	-1.0885	MCTP1	multiple C2 and transmembrane domain containing 1
228312_at	0.961	0.00708548	2.96981	-3.89	1.17233	PI16	peptidase inhibitor 16
209606_at	0.961	0.00709354	2.96932	-3.89	2.02337	CYTIP	cytohesin 1 interacting protein
1556239_a_at	0.961	0.00709422	2.96928	-3.89	1.82014
202643_s_at	0.961	0.00714317	-2.9663	-3.89	-2.06026	TNFAIP3	TNF alpha induced protein 3
232891_at	0.961	0.00715188	-2.96577	-3.89	-1.43912	SIRPD	signal regulatory protein delta
223898_at	0.961	0.00716047	-2.96525	-3.89	-1.09316	ZNF670	zinc finger protein 670
1569190_at	0.961	0.00718238	-2.96392	-3.89	-1.22783	LOC101927137///SCLT1	uncharacterized LOC101927137///sodium channel and clathrin linker 1
232528_at	0.961	0.00725701	2.95945	-3.89	1.28989
230340_s_at	0.961	0.00725797	-2.95939	-3.89	-1.41049	WASL	Wiskott-Aldrich syndrome like
244460_at	0.961	0.00728233	2.95793	-3.89	1.60168	TMEM225	transmembrane protein 225
229393_at	0.961	0.00730185	2.95677	-3.89	1.09486	L3MBTL3	l(3)mbt-like 3 (Drosophila)
1570163_at	0.961	0.00730817	-2.9564	-3.89	-1.51962	EGFLAM-AS4	EGFLAM antisense RNA 4
235744_at	0.961	0.00731592	-2.95594	-3.89	-1.38346	PPTC7	PTC7 protein phosphatase homolog
207886_s_at	0.961	0.0073165	2.95591	-3.89	1.5811	CALCR	calcitonin receptor
211301_at	0.961	0.0073337	2.95489	-3.89	1.40973	KCND3	potassium voltage-gated channel subfamily D member 3
233578_at	0.961	0.0073461	2.95415	-3.89	1.68308	C1orf101	chromosome 1 open reading frame 101
225896_at	0.961	0.00741199	2.95028	-3.9	1.64809	MPRIP	myosin phosphatase Rho interacting protein
1566728_at	0.961	0.00741881	2.94988	-3.9	1.55817
236130_at	0.961	0.00742353	2.94961	-3.9	1.65393	SNORA37	small nucleolar RNA, H/ACA box 37
243040_at	0.961	0.0074291	2.94928	-3.9	2.19549
244112_x_at	0.961	0.00743646	2.94885	-3.9	1.55252
239439_at	0.961	0.00744053	-2.94861	-3.9	-1.61904	AFF4	AF4/FMR2 family member 4
1561042_at	0.961	0.00745072	-2.94802	-3.9	-1.61624	CASC7///AGO2	cancer susceptibility candidate 7 (non-protein coding)///argonaute 2, RISC catalytic component
1565934_at	0.961	0.00747684	2.9465	-3.9	2.00078	ZGRF1	zinc finger GRF-type containing 1
232719_at	0.961	0.0074843	2.94607	-3.9	1.49448	CELF4	CUGBP, Elav-like family member 4
230162_s_at	0.961	0.00750707	-2.94475	-3.9	-1.36179
231047_at	0.961	0.00750872	2.94465	-3.9	1.4124
223217_s_at	0.961	0.0075128	-2.94442	-3.9	-1.71553	NFKBIZ	NFKB inhibitor zeta
216485_s_at	0.961	0.00753857	2.94293	-3.9	1.38344	TPSAB1	tryptase alpha/beta 1
241192_at	0.961	0.00754336	-2.94266	-3.9	-1.74166
236211_at	0.961	0.00757664	2.94074	-3.9	1.90578	RAB40B	RAB40B, member RAS oncogene family
237203_at	0.961	0.00760162	2.93931	-3.9	1.37213	LOC101929305	uncharacterized LOC101929305
220350_at	0.961	0.00761249	2.93869	-3.9	1.57772	ZNF235	zinc finger protein 235
238178_at	0.961	0.00763789	-2.93725	-3.9	-2.63851
210952_at	0.961	0.00769552	2.93398	-3.9	1.37458	AP4S1	adaptor related protein complex 4 sigma 1 subunit
227867_at	0.961	0.00772043	-2.93258	-3.9	-1.33158	TRABD2A	TraB domain containing 2A
216844_at	0.961	0.00773427	2.9318	-3.9	1.75994	ZC3H7B	zinc finger CCCH-type containing 7B
233790_at	0.961	0.00774589	2.93115	-3.9	1.539
238618_at	0.961	0.00775358	2.93071	-3.9	1.31664	NF2	neurofibromin 2
207331_at	0.961	0.00776697	-2.92996	-3.9	-1.35269	CENPF	centromere protein F
244126_at	0.961	0.00780506	-2.92784	-3.91	-1.11008	PEX11G	peroxisomal biogenesis factor 11 gamma
240977_at	0.961	0.00781025	2.92755	-3.91	1.80277
243578_at	0.961	0.00782777	2.92657	-3.91	1.71765
1564490_at	0.961	0.00783039	2.92643	-3.91	1.36439	LINC01165	long intergenic non-protein coding RNA 1165
1562653_at	0.961	0.00789456	2.92288	-3.91	1.61144	LOC101929413	uncharacterized LOC101929413
1553388_at	0.961	0.00789537	-2.92283	-3.91	-1.47123	FAM26D	family with sequence similarity 26 member D
230254_at	0.961	0.00793826	2.92048	-3.91	1.31801	FAM26E	family with sequence similarity 26 member E
238016_s_at	0.961	0.00793915	2.92043	-3.91	1.78824	LOC100507507	uncharacterized LOC100507507
237142_at	0.961	0.00795553	2.91953	-3.91	2.02884	PPARA	peroxisome proliferator activated receptor alpha
239522_at	0.961	0.00795858	2.91936	-3.91	1.20819	IL12RB1	interleukin 12 receptor subunit beta 1
221144_at	0.961	0.00795954	2.91931	-3.91	1.9197
229962_at	0.961	0.00798091	-2.91814	-3.91	-1.33919	LRRC37A3	leucine rich repeat containing 37 member A3
1563467_at	0.961	0.00801934	2.91605	-3.91	1.94935
1557553_at	0.961	0.0080337	2.91527	-3.91	1.62417	PPP1R12B	protein phosphatase 1 regulatory subunit 12B
241934_at	0.961	0.00806371	2.91365	-3.91	1.3527	NTM	neurotrimin
206386_at	0.961	0.00808961	2.91225	-3.91	1.86588	SERPINA7	serpin family A member 7
223846_at	0.961	0.00811076	2.91112	-3.91	1.68774	AZI2	5-azacytidine induced 2
217404_s_at	0.961	0.00811472	2.9109	-3.91	1.80627	COL2A1	collagen type II alpha 1 chain
1558189_a_at	0.961	0.00811481	-2.9109	-3.91	-1.72617	LOC284570///GPR37L1	uncharacterized LOC284570///G protein-coupled receptor 37 like 1
243797_at	0.961	0.00812141	-2.91055	-3.91	-2.21354	STK17B	serine/threonine kinase 17b
1555056_at	0.961	0.00814326	2.90938	-3.91	1.18312	CCNG2	cyclin G2
229270_x_at	0.961	0.00815024	2.909	-3.91	1.51494	SSBP4	single stranded DNA binding protein 4
1552575_a_at	0.961	0.00815027	-2.909	-3.91	-1.76416	C6orf141	chromosome 6 open reading frame 141
213665_at	0.961	0.00815449	2.90878	-3.91	1.79597	SOX4	SRY-box 4
1563903_x_at	0.961	0.00815899	-2.90854	-3.91	-2.28698
214082_at	0.961	0.00819219	2.90677	-3.91	1.53428	CA5B	carbonic anhydrase 5B
1554983_at	0.961	0.00828397	2.90191	-3.92	1.89285	LINC00317	long intergenic non-protein coding RNA 317
221333_at	0.961	0.00829495	2.90133	-3.92	1.24613	FOXP3	forkhead box P3
1559284_at	0.961	0.00835352	2.89826	-3.92	1.50595	LOC101929774	uncharacterized LOC101929774
241432_at	0.961	0.00836416	-2.89771	-3.92	-1.52811	SLIT2-IT1	SLIT2 intronic transcript 1
242002_at	0.961	0.0083973	2.89598	-3.92	1.6732	NKAIN2	Na+/K+ transporting ATPase interacting 2
205786_s_at	0.961	0.0084012	-2.89578	-3.92	-1.43409	ITGAM	integrin subunit alpha M
1566787_at	0.961	0.00841213	2.89521	-3.92	1.84583
242200_at	0.961	0.00841983	2.89482	-3.92	1.56371	ADAMTSL5	ADAMTS like 5
228139_at	0.961	0.00846296	2.89259	-3.92	1.2525	RIPK3	receptor interacting serine/threonine kinase 3
238646_at	0.961	0.00847021	2.89221	-3.92	1.04057
242084_at	0.961	0.0084727	2.89208	-3.92	1.53622	THEG5	testis highly expressed protein 5
226526_s_at	0.961	0.00850454	2.89045	-3.92	1.51014	CKAP4	cytoskeleton associated protein 4
214388_at	0.961	0.00851314	2.89001	-3.92	1.97377
225606_at	0.961	0.00852096	-2.88961	-3.92	-1.22355	BCL2L11	BCL2 like 11
215168_at	0.961	0.00852436	2.88943	-3.92	1.72221	TIMM17A	translocase of inner mitochondrial membrane 17 homolog A (yeast)
240371_at	0.961	0.00853932	2.88867	-3.92	1.71307	LINC01192	long intergenic non-protein coding RNA 1192
226228_at	0.961	0.00854728	2.88826	-3.92	1.83275	AQP4	aquaporin 4
238054_at	0.961	0.00854909	2.88817	-3.92	1.32642	ADPRHL1	ADP-ribosylhydrolase like 1
238263_at	0.961	0.00857664	-2.88676	-3.92	-1.73731	EPHA1-AS1	EPHA1 antisense RNA 1
213609_s_at	0.961	0.00858299	2.88644	-3.92	1.22248	SEZ6L	seizure related 6 homolog like
206341_at	0.961	0.00859781	2.88569	-3.92	1.27409	IL2RA	interleukin 2 receptor subunit alpha
210151_s_at	0.961	0.00863769	-2.88366	-3.92	-1.39515	DYRK3	dual specificity tyrosine phosphorylation regulated kinase 3
241071_at	0.961	0.00865721	2.88268	-3.92	1.306
204420_at	0.961	0.00865973	-2.88255	-3.92	-1.26199	FOSL1	FOS like 1, AP-1 transcription factor subunit
234673_at	0.961	0.00867	2.88203	-3.92	1.97411	HHLA2	HERV-H LTR-associating 2
232497_at	0.961	0.00877424	2.87681	-3.93	1.43882	ZNF3	zinc finger protein 3
1552303_a_at	0.961	0.00878586	-2.87623	-3.93	-1.1371	TMEM106A	transmembrane protein 106A
214209_s_at	0.961	0.00880867	-2.8751	-3.93	-1.43096	ABCB9	ATP binding cassette subfamily B member 9
1567386_at	0.961	0.00880922	2.87507	-3.93	2.23646
229568_at	0.961	0.00884249	2.87342	-3.93	1.81849	MOB3B	MOB kinase activator 3B
1555035_a_at	0.961	0.00884418	-2.87334	-3.93	-1.31765	CLRN1	clarin 1
1552719_at	0.961	0.008861	2.87251	-3.93	1.42135	CASC4	cancer susceptibility candidate 4
1562230_at	0.961	0.00886511	2.87231	-3.93	1.4203
201721_s_at	0.961	0.0088766	2.87174	-3.93	1.88512	LAPTM5	lysosomal protein transmembrane 5
220406_at	0.961	0.00888774	2.87119	-3.93	1.47622	TGFB2	transforming growth factor beta 2
240544_at	0.961	0.00888812	-2.87117	-3.93	-1.58263
209781_s_at	0.961	0.00890295	-2.87044	-3.93	-1.03627	KHDRBS3	KH RNA binding domain containing, signal transduction associated 3
1554931_at	0.961	0.00890326	2.87043	-3.93	1.44117	CYP4A22///CYP4A11	cytochrome P450 family 4 subfamily A member 22///cytochrome P450 family 4 subfamily A member 11
1562585_at	0.961	0.00893706	2.86877	-3.93	1.56172	LOC284263	uncharacterized LOC284263
1568593_a_at	0.961	0.00893833	2.86871	-3.93	1.32937	NUDT16P1	nudix hydrolase 16 pseudogene 1
205952_at	0.961	0.00894352	2.86846	-3.93	1.57372	KCNK3	potassium two pore domain channel subfamily K member 3
220462_at	0.961	0.00896457	2.86743	-3.93	1.69154	CSRNP3	cysteine and serine rich nuclear protein 3
240529_at	0.961	0.0089658	2.86737	-3.93	2.09911
1555749_at	0.961	0.00903694	2.86391	-3.93	1.81268	SF1	splicing factor 1
225316_at	0.961	0.00905605	-2.86298	-3.93	-1.37528	MFSD2A	major facilitator superfamily domain containing 2A
232637_at	0.961	0.00906034	-2.86278	-3.93	-1.3695	2020-09-02	septin 2
243700_x_at	0.961	0.009073	2.86217	-3.93	1.80152	FAM47A	family with sequence similarity 47 member A
1564165_at	0.961	0.00907922	-2.86187	-3.93	-1.02389	LOC100630923	LOC100289561-PRKRIP1 readthrough
220090_at	0.961	0.00909066	2.86131	-3.93	1.59222	CRNN	cornulin
1554947_at	0.961	0.00909688	2.86102	-3.93	1.24927	ACAT1	acetyl-CoA acetyltransferase 1
1568702_a_at	0.961	0.00916299	2.85784	-3.93	1.79607	PAAF1	proteasomal ATPase associated factor 1
209519_at	0.961	0.00919208	2.85646	-3.94	1.57702	NCBP1	nuclear cap binding protein subunit 1
224405_at	0.961	0.00924859	2.85377	-3.94	2.20359	FCRL5	Fc receptor like 5
237618_at	0.961	0.00925704	-2.85337	-3.94	-1.89135
1553452_at	0.961	0.00926413	2.85304	-3.94	1.46299	MYO1H	myosin IH
219665_at	0.961	0.00929704	2.85148	-3.94	1.52463	NUDT18	nudix hydrolase 18
243346_at	0.961	0.00930606	2.85106	-3.94	1.40903	LMOD3	leiomodin 3
1554903_at	0.961	0.00930769	-2.85098	-3.94	-1.23388	FRMD8	FERM domain containing 8
1554650_a_at	0.961	0.00932457	2.85019	-3.94	1.53256
222940_at	0.961	0.00932601	2.85012	-3.94	1.82567	SULT1E1	sulfotransferase family 1E member 1
207399_at	0.961	0.00934323	2.84931	-3.94	1.31718	BFSP2	beaded filament structural protein 2
1561555_at	0.961	0.00934643	2.84916	-3.94	1.28631	LINC00970	long intergenic non-protein coding RNA 970
215893_x_at	0.961	0.0093496	2.84901	-3.94	1.21105
1562294_x_at	0.961	0.00936245	2.84841	-3.94	1.96592	ANKRD30B	ankyrin repeat domain 30B
203369_x_at	0.961	0.00936878	2.84811	-3.94	1.23249	PDLIM7	PDZ and LIM domain 7
238186_at	0.961	0.00939216	2.84702	-3.94	1.3828
242242_at	0.961	0.0094584	2.84394	-3.94	1.30617	USP32///USP6	ubiquitin specific peptidase 32///ubiquitin specific peptidase 6
244090_at	0.961	0.00946198	2.84377	-3.94	1.37697
1564003_at	0.961	0.00948412	2.84275	-3.94	1.68587
1559865_at	0.961	0.00951051	2.84153	-3.94	1.72902
1570131_at	0.961	0.00953698	2.84031	-3.94	1.63593	LOC285847	uncharacterized LOC285847
211235_s_at	0.961	0.00955527	-2.83947	-3.94	-1.40901	ESR1	estrogen receptor 1
222310_at	0.961	0.00957702	2.83847	-3.94	1.80133	SCAF4	SR-related CTD associated factor 4
243477_at	0.961	0.00957927	2.83837	-3.94	1.58582	ATG10	autophagy related 10
244364_at	0.961	0.00960675	2.83711	-3.94	1.41769	MYO3A	myosin IIIA
233573_s_at	0.961	0.00962142	2.83644	-3.94	1.40927	WDR6	WD repeat domain 6
239146_at	0.961	0.00963064	2.83602	-3.94	1.92712	CLDND1	claudin domain containing 1
244549_at	0.961	0.00963136	2.83599	-3.94	1.5214
1570303_at	0.961	0.00963625	2.83576	-3.94	1.55577
237386_at	0.961	0.00966757	2.83434	-3.94	1.36374	SMIM10L1	small integral membrane protein 10 like 1
242007_at	0.961	0.00967535	2.83399	-3.95	1.4264	FBXO30	F-box protein 30
226389_s_at	0.961	0.00978403	2.82908	-3.95	1.29133	RAPGEF1	Rap guanine nucleotide exchange factor 1
231286_at	0.961	0.00981259	-2.8278	-3.95	-1.32821	C9orf47	chromosome 9 open reading frame 47
1552637_at	0.961	0.00984139	2.82651	-3.95	1.30609	PTPN11	protein tyrosine phosphatase, non-receptor type 11
91703_at	0.961	0.00984535	2.82634	-3.95	1.71345	EHBP1L1	EH domain binding protein 1 like 1
238031_at	0.961	0.00986732	2.82536	-3.95	1.62168	LOC101928707	uncharacterized LOC101928707
205945_at	0.961	0.00986936	-2.82527	-3.95	-1.51865	IL6R	interleukin 6 receptor
226747_at	0.961	0.00995844	-2.82132	-3.95	-1.0527	TXNDC16	thioredoxin domain containing 16
213138_at	0.961	0.00996143	-2.82118	-3.95	-1.24693	ARID5A	AT-rich interaction domain 5A
219455_at	0.961	0.00998577	-2.82011	-3.95	-1.15184	CFAP69	cilia and flagella associated protein 69
206642_at	0.961	0.00999639	2.81964	-3.95	1.80514	DSG1	desmoglein 1
1563119_at	0.961	0.0100182	2.81869	-3.95	1.56686	HP09025	uncharacterized LOC100652929
244379_at	0.961	0.0100978	2.8152	-3.95	1.6596	LOC101927507	uncharacterized LOC101927507
207224_s_at	0.961	0.0101027	2.81499	-3.95	1.25069	SIGLEC7	sialic acid binding Ig like lectin 7
233626_at	0.961	0.0101402	2.81336	-3.95	2.00813
219554_at	0.961	0.0101738	-2.8119	-3.95	-1.69391	RHCG	Rh family C glycoprotein
1565887_at	0.961	0.0102179	2.81	-3.96	1.90701
231487_at	0.961	0.0102214	-2.80985	-3.96	-1.72501	COX8C	cytochrome c oxidase subunit 8C
241236_at	0.961	0.0102217	2.80984	-3.96	1.46773
238146_at	0.961	0.0102324	2.80937	-3.96	1.50244
244053_at	0.961	0.0102443	2.80886	-3.96	1.34981
229225_at	0.961	0.0102496	-2.80864	-3.96	-1.23523	NRP2	neuropilin 2
203766_s_at	0.961	0.0102508	-2.80858	-3.96	-1.46243	LMOD1	leiomodin 1
235090_at	0.961	0.010313	-2.80592	-3.96	-1.48327	ZNF710	zinc finger protein 710
219279_at	0.961	0.0103255	2.80539	-3.96	1.75335	DOCK10	dedicator of cytokinesis 10
206666_at	0.961	0.0103399	2.80477	-3.96	1.69807	GZMK	granzyme K
231837_at	0.961	0.0103514	2.80428	-3.96	1.45162	USP28	ubiquitin specific peptidase 28
1563568_at	0.961	0.0103539	2.80418	-3.96	1.434	LINC00559	long intergenic non-protein coding RNA 559
210310_s_at	0.961	0.0103611	-2.80387	-3.96	-1.53678	FGF5	fibroblast growth factor 5
210135_s_at	0.961	0.0103624	2.80382	-3.96	1.62113	SHOX2	short stature homeobox 2
224126_at	0.961	0.0103697	2.80351	-3.96	1.82413	SLC10A7	solute carrier family 10 member 7
206741_at	0.961	0.0104454	-2.8003	-3.96	-2.54145	SSUH2	ssu-2 homolog (C. elegans)
228534_s_at	0.961	0.0104456	2.80029	-3.96	1.53692
244344_at	0.961	0.0104553	2.79988	-3.96	1.62129	WNK4	WNK lysine deficient protein kinase 4
238593_at	0.961	0.0104666	2.79941	-3.96	1.01898	C11orf80	chromosome 11 open reading frame 80
240888_at	0.961	0.0104954	2.7982	-3.96	1.62198
242917_at	0.961	0.0106283	-2.79265	-3.96	-1.09221	RASGEF1A	RasGEF domain family member 1A
242828_at	0.961	0.0106326	2.79247	-3.96	1.19811	FIGN	fidgetin, microtubule severing factor
1558815_at	0.961	0.0106364	2.79231	-3.96	1.61263	SORBS2	sorbin and SH3 domain containing 2
219936_s_at	0.961	0.0106443	2.79198	-3.96	2.12596	GPR87	G protein-coupled receptor 87
1555300_a_at	0.961	0.0106519	2.79167	-3.96	1.11341	MED12L	mediator complex subunit 12 like
1555869_a_at	0.961	0.0106656	2.7911	-3.96	1.59934	LOC100507477	uncharacterized LOC100507477
1568827_at	0.961	0.0107141	2.7891	-3.96	1.26899	LOC401442	uncharacterized LOC401442
1556793_a_at	0.961	0.0107736	-2.78665	-3.97	-1.85038	FAM83C	family with sequence similarity 83 member C
205599_at	0.961	0.0108117	-2.7851	-3.97	-1.09819	TRAF1	TNF receptor associated factor 1
206395_at	0.961	0.0108167	2.78489	-3.97	1.3623	DGKG	diacylglycerol kinase gamma
231316_at	0.961	0.0108324	2.78425	-3.97	1.70682
AFFX-DapX-3_at	0.961	0.0108517	2.78347	-3.97	1.35787
221168_at	0.961	0.0108547	2.78335	-3.97	1.8766	PRDM13	PR/SET domain 13
219737_s_at	0.961	0.0108617	-2.78306	-3.97	-1.27514	PCDH9	protocadherin 9
237275_at	0.961	0.0108629	2.78301	-3.97	1.50936	LINC00458	long intergenic non-protein coding RNA 458
206826_at	0.961	0.0109176	2.78079	-3.97	1.34812	PMP2	peripheral myelin protein 2
227377_at	0.961	0.0109872	2.77799	-3.97	1.35542	IGF2BP1	insulin like growth factor 2 mRNA binding protein 1
1552421_a_at	0.961	0.011018	2.77675	-3.97	1.26574	CALR3	calreticulin 3
211173_at	0.961	0.0110299	2.77627	-3.97	1.45721	CCKAR	cholecystokinin A receptor
212387_at	0.961	0.0110321	2.77618	-3.97	1.01314	TCF4	transcription factor 4
1553130_at	0.961	0.0110558	2.77524	-3.97	1.42993	LOC652276	potassium channel tetramerization domain containing 5 pseudogene
241720_at	0.961	0.0110642	2.7749	-3.97	1.0607	ZNF326	zinc finger protein 326
240306_at	0.961	0.0110713	2.77462	-3.97	1.2949	LINC00312	long intergenic non-protein coding RNA 312
213684_s_at	0.961	0.0110801	-2.77427	-3.97	-1.36897	PDLIM5	PDZ and LIM domain 5
240674_at	0.961	0.0111407	-2.77186	-3.97	-1.06782	JARID2	jumonji and AT-rich interaction domain containing 2
211274_at	0.961	0.0111449	2.77169	-3.97	1.5576	TBX1	T-box 1
220987_s_at	0.961	0.011153	-2.77137	-3.97	-1.09241	NUAK2///AKIP1	NUAK family kinase 2///A-kinase interacting protein 1
1563101_at	0.961	0.0111676	-2.77079	-3.97	-1.58226	ARNTL2-AS1	ARNTL2 antisense RNA 1
226913_s_at	0.961	0.0111777	-2.77039	-3.97	-2.10454	SOX8	SRY-box 8
208010_s_at	0.961	0.0111873	2.77001	-3.97	1.74426	PTPN22	protein tyrosine phosphatase, non-receptor type 22
211556_at	0.961	0.0111924	2.76981	-3.97	1.48069	MAPRE2	microtubule associated protein RP/EB family member 2
237756_at	0.961	0.011255	2.76734	-3.97	1.73422	PHOSPHO2-KLHL23///PHOSPHO2///KLHL23	PHOSPHO2-KLHL23 readthrough///phosphatase, orphan 2///kelch like family member 23
1553944_at	0.961	0.0112659	2.76691	-3.97	1.82975	MIA2///CTAGE5	melanoma inhibitory activity 2///CTAGE family member 5, ER export factor
1569759_at	0.961	0.0113031	2.76545	-3.97	1.65986
206209_s_at	0.961	0.0113489	2.76366	-3.97	1.34657	CA4	carbonic anhydrase 4
227352_at	0.961	0.0113496	2.76364	-3.97	1.11905	SWSAP1	SWIM-type zinc finger 7 associated protein 1
236965_at	0.961	0.0113596	-2.76325	-3.98	-1.10263	UBQLNL	ubiquilin-like
217316_at	0.961	0.0113858	2.76223	-3.98	1.72018	OR7A10	olfactory receptor family 7 subfamily A member 10
215164_at	0.961	0.0114534	-2.75961	-3.98	-1.483
238570_at	0.961	0.0114766	2.75871	-3.98	1.48682
1553281_at	0.961	0.0114869	-2.75831	-3.98	-1.70254	PLCXD2	phosphatidylinositol specific phospholipase C X domain containing 2
203990_s_at	0.961	0.0115117	-2.75736	-3.98	-1.22657	KDM6A	lysine demethylase 6A
242130_at	0.961	0.0115414	2.75622	-3.98	1.71759
224526_at	0.961	0.0115726	2.75502	-3.98	1.27075	LOC100132319	uncharacterized LOC100132319
219829_at	0.961	0.0116093	2.75362	-3.98	1.77591	ITGB1BP2	integrin subunit beta 1 binding protein 2
230224_at	0.961	0.0116435	2.75232	-3.98	1.09481	ZCCHC18	zinc finger CCHC-type containing 18
215183_at	0.961	0.0116489	2.75211	-3.98	1.23619
228068_at	0.961	0.0116518	2.752	-3.98	1.43124	GOLGA7B	golgin A7 family member B
1561230_at	0.961	0.0116867	-2.75067	-3.98	-2.02133
206411_s_at	0.961	0.0116945	-2.75038	-3.98	-1.30827	ABL2	ABL proto-oncogene 2, non-receptor tyrosine kinase
229863_s_at	0.961	0.0117268	2.74915	-3.98	1.07313	ELP6	elongator acetyltransferase complex subunit 6
210575_at	0.961	0.0117485	-2.74834	-3.98	-1.46668	NUDC	nuclear distribution C, dynein complex regulator
210090_at	0.961	0.0117672	-2.74763	-3.98	-2.21022	ARC	activity regulated cytoskeleton associated protein
205275_at	0.961	0.0117766	-2.74728	-3.98	-1.32347	GTPBP1	GTP binding protein 1
207442_at	0.961	0.01178	-2.74715	-3.98	-2.56377	CSF3	colony stimulating factor 3
229126_at	0.961	0.0117821	2.74707	-3.98	1.14221	TMEM19	transmembrane protein 19
1559540_at	0.961	0.011783	2.74704	-3.98	1.31291	LOC100506526	uncharacterized LOC100506526
216375_s_at	0.961	0.0117917	2.74671	-3.98	1.37085	ETV5	ETS variant 5
1560806_at	0.961	0.0118164	2.74578	-3.98	1.82024	LOC646743///TISP43	uncharacterized LOC646743///uncharacterized LOC150527
210709_at	0.961	0.011848	2.7446	-3.98	1.42875	ZC3H15	zinc finger CCCH-type containing 15
234426_x_at	0.961	0.0118752	2.74358	-3.98	1.57604	PIH2	pregnancy-induced hypertension syndrome-related protein
212226_s_at	0.961	0.0118763	-2.74354	-3.98	-1.78119	PLPP3	phospholipid phosphatase 3
207019_s_at	0.961	0.011882	2.74333	-3.98	1.33736	AKAP4	A-kinase anchoring protein 4
1557874_at	0.961	0.0118829	2.74329	-3.98	1.58653	GRID1-AS1	GRID1 antisense RNA 1
232717_at	0.961	0.0118861	2.74317	-3.98	1.45028	KALRN	kalirin, RhoGEF kinase
244066_at	0.961	0.0119807	2.73965	-3.99	1.8217
228762_at	0.961	0.0119837	-2.73954	-3.99	-1.06678	LFNG	LFNG O-fucosylpeptide 3-beta-N-acetylglucosaminyltransferase
238837_at	0.961	0.0120239	2.73806	-3.99	1.49034	PHF8	PHD finger protein 8
243692_at	0.961	0.0121146	2.73472	-3.99	1.27724	GATA4	GATA binding protein 4
211131_s_at	0.961	0.0121233	-2.7344	-3.99	-1.29605	EDA	ectodysplasin A
243569_at	0.961	0.0121728	2.73259	-3.99	1.23178	TMEM174	transmembrane protein 174
1568286_at	0.961	0.0122045	2.73144	-3.99	1.92092	HMGA2	high mobility group AT-hook 2
240813_at	0.961	0.0122421	2.73007	-3.99	1.46871
214300_s_at	0.961	0.0122486	-2.72983	-3.99	-1.61513	TOP3A	topoisomerase (DNA) III alpha
228277_at	0.961	0.0122601	2.72942	-3.99	1.23219	FBXL19	F-box and leucine rich repeat protein 19
237566_at	0.961	0.0122734	2.72894	-3.99	1.62737
1564909_at	0.961	0.0122946	2.72817	-3.99	2.20238	LOC101928495	uncharacterized LOC101928495
218475_at	0.961	0.0123001	2.72797	-3.99	1.64336	TRMT2A	tRNA methyltransferase 2 homolog A
218600_at	0.961	0.0123003	2.72796	-3.99	1.28669	LIMD2	LIM domain containing 2
231779_at	0.961	0.0123266	-2.72701	-3.99	-1.29718	IRAK2	interleukin 1 receptor associated kinase 2
206532_at	0.961	0.0123343	2.72673	-3.99	1.46855	SMARCB1	SWI/SNF related, matrix associated, actin dependent regulator of chromatin, subfamily b, member 1
1556608_a_at	0.961	0.0123734	2.72533	-3.99	1.31302	EHD4	EH domain containing 4
211363_s_at	0.961	0.0123817	2.72503	-3.99	1.43809	MTAP	methylthioadenosine phosphorylase
209355_s_at	0.961	0.0124177	-2.72374	-3.99	-2.1149	PLPP3	phospholipid phosphatase 3
243836_at	0.961	0.0124194	2.72368	-3.99	1.6602	UNC80	unc-80 homolog, NALCN activator
1561770_at	0.961	0.0124679	2.72195	-3.99	1.48694
231947_at	0.961	0.0124684	2.72193	-3.99	1.63348	MYCT1	myc target 1
1561672_at	0.961	0.012469	2.72191	-3.99	2.063
214111_at	0.961	0.0124894	2.72118	-3.99	1.74907	OPCML	opioid binding protein/cell adhesion molecule like
207757_at	0.961	0.0125191	2.72012	-3.99	1.62726	ZFP2	ZFP2 zinc finger protein
244291_x_at	0.961	0.0125701	2.71832	-3.99	1.4553
237776_at	0.961	0.0125729	2.71822	-3.99	1.65429	ZADH2	zinc binding alcohol dehydrogenase domain containing 2
1561652_at	0.961	0.0125845	2.7178	-3.99	1.43153	BECN1	beclin 1
239425_at	0.961	0.0126215	2.7165	-3.99	1.62644	DCUN1D5	defective in cullin neddylation 1 domain containing 5
238638_at	0.961	0.0126381	2.71591	-4	1.4373	SLC37A2	solute carrier family 37 member 2
244539_at	0.961	0.0126555	2.7153	-4	1.58566
223643_at	0.961	0.0127393	2.71236	-4	1.66973	CRYGS	crystallin gamma S
218207_s_at	0.961	0.0127402	-2.71233	-4	-1.48615	STMN3	stathmin 3
214964_at	0.961	0.012756	2.71178	-4	1.62681
213863_s_at	0.961	0.012761	2.7116	-4	1.49883	OAZ3	ornithine decarboxylase antizyme 3
208255_s_at	0.961	0.012769	-2.71133	-4	-1.4885	FKBP8	FK506 binding protein 8
213972_at	0.961	0.012771	-2.71126	-4	-1.79301
203861_s_at	0.961	0.0127877	-2.71067	-4	-1.3039	ACTN2	actinin alpha 2
207074_s_at	0.961	0.0127994	2.71027	-4	1.33202	SLC18A1	solute carrier family 18 member A1
239649_at	0.961	0.0128976	2.70686	-4	1.62173
1561301_at	0.961	0.0129184	2.70615	-4	1.22979	MAGI1-IT1	MAGI1 intronic transcript 1
1568920_at	0.961	0.0129873	2.70377	-4	1.66665
242090_x_at	0.961	0.0130056	2.70315	-4	2.04368
1557544_at	0.961	0.0130061	-2.70313	-4	-1.24623	CFAP58	cilia and flagella associated protein 58
234200_at	0.961	0.013015	2.70283	-4	1.59752
1559288_at	0.961	0.0130645	2.70113	-4	1.91405
229475_at	0.961	0.0130872	-2.70036	-4	-1.57841	MAEL	maelstrom spermatogenic transposon silencer
1563171_at	0.961	0.0131131	2.69948	-4	1.58594	GNA14-AS1	GNA14 antisense RNA 1
240097_at	0.961	0.0131179	2.69931	-4	1.14473
243927_x_at	0.961	0.0131381	2.69863	-4	1.02115	KIAA1429	KIAA1429
239861_at	0.961	0.0131575	2.69797	-4	1.31241
228671_at	0.961	0.0131897	2.69688	-4	1.52247	TMEM201	transmembrane protein 201
240173_at	0.961	0.0132236	2.69573	-4	1.64227	GPRIN3	GPRIN family member 3
241671_x_at	0.961	0.013249	-2.69488	-4	-1.50499	CASC15	cancer susceptibility candidate 15 (non-protein coding)
1569306_at	0.961	0.0132823	2.69376	-4	1.74459	LOC105371622	uncharacterized LOC105371622
220628_s_at	0.961	0.0132933	2.69339	-4	1.0702	SDK2	sidekick cell adhesion molecule 2
239420_at	0.961	0.0132945	2.69335	-4	1.23418	LINC01187	long intergenic non-protein coding RNA 1187
229332_at	0.961	0.0133137	2.6927	-4	1.8757	HPDL	4-hydroxyphenylpyruvate dioxygenase like
231564_at	0.961	0.0133253	-2.69231	-4.01	-1.73155	MANEAL	mannosidase endo-alpha like
237185_at	0.961	0.0133352	2.69198	-4.01	1.19454
225372_at	0.961	0.0133452	-2.69165	-4.01	-1.24349	C10orf54	chromosome 10 open reading frame 54
222194_at	0.961	0.0133477	2.69156	-4.01	1.39238	FAM66D	family with sequence similarity 66 member D
1559021_at	0.961	0.013419	-2.68919	-4.01	-1.27538	C3orf52	chromosome 3 open reading frame 52
239473_x_at	0.961	0.0134263	2.68894	-4.01	1.18665	MAP6D1	MAP6 domain containing 1
1558199_at	0.961	0.0134735	2.68738	-4.01	1.14819	FN1	fibronectin 1
236323_at	0.961	0.0135062	2.68629	-4.01	1.54769	PVRL3-AS1	PVRL3 antisense RNA 1
220984_s_at	0.961	0.0135121	-2.6861	-4.01	-2.35087	SLCO5A1	solute carrier organic anion transporter family member 5A1
231899_at	0.961	0.0135168	-2.68594	-4.01	-1.0113	ZC3H12C	zinc finger CCCH-type containing 12C
244541_x_at	0.961	0.0135178	2.68591	-4.01	1.73291
244591_x_at	0.961	0.0135289	2.68554	-4.01	1.40616	RNF207	ring finger protein 207
235983_at	0.961	0.0135304	2.68549	-4.01	1.44686
207696_at	0.961	0.0135393	2.6852	-4.01	1.3855	FUT9	fucosyltransferase 9
214277_at	0.961	0.0135526	2.68476	-4.01	1.40968	COX11	COX11, cytochrome c oxidase copper chaperone
1555425_x_at	0.961	0.0135608	-2.68449	-4.01	-1.61774	SSH2	slingshot protein phosphatase 2
1559093_at	0.961	0.0135628	2.68443	-4.01	2.09844	LINC01530	long intergenic non-protein coding RNA 1530
203708_at	0.961	0.0135985	-2.68325	-4.01	-1.45969	PDE4B	phosphodiesterase 4B
226557_at	0.961	0.0136002	2.68319	-4.01	1.18023	TTC5	tetratricopeptide repeat domain 5
1557865_at	0.961	0.0136092	2.6829	-4.01	1.66526	LOC100505658	uncharacterized LOC100505658
233522_at	0.961	0.0136424	2.68181	-4.01	1.24865	MEF2C-AS1	MEF2C antisense RNA 1
213580_at	0.961	0.0136459	-2.68169	-4.01	-1.5741	CREBZF	CREB/ATF bZIP transcription factor
231097_at	0.961	0.013662	2.68117	-4.01	1.05363
1569867_at	0.961	0.0136624	2.68116	-4.01	1.51156	EME2	essential meiotic structure-specific endonuclease subunit 2
226075_at	0.961	0.0136662	-2.68103	-4.01	-1.18454	SPSB1	splA/ryanodine receptor domain and SOCS box containing 1
229221_at	0.961	0.0136847	-2.68043	-4.01	-1.28475	CD44	CD44 molecule (Indian blood group)
1559023_a_at	0.961	0.0136924	2.68017	-4.01	1.66486	EFCAB14	EF-hand calcium binding domain 14
241523_at	0.961	0.0136975	2.68001	-4.01	1.11398
216253_s_at	0.961	0.0137007	-2.6799	-4.01	-1.73092	PARVB	parvin beta
221287_at	0.961	0.0137152	2.67943	-4.01	1.0207	RNASEL	ribonuclease L
237660_at	0.961	0.0137404	2.67861	-4.01	1.50609	UNC80	unc-80 homolog, NALCN activator
1557165_s_at	0.961	0.0137414	2.67858	-4.01	1.06532	KLHL18	kelch like family member 18
236441_at	0.961	0.0137614	-2.67793	-4.01	-1.11401
1563742_at	0.961	0.0137776	-2.6774	-4.01	-1.04257	LINC00842	long intergenic non-protein coding RNA 842
241814_at	0.961	0.0137981	2.67674	-4.01	1.96323
237238_at	0.961	0.0139068	2.67323	-4.01	1.44693	WWC1	WW and C2 domain containing 1
209706_at	0.961	0.0139098	-2.67313	-4.01	-1.32618	NKX3-1	NK3 homeobox 1
228263_at	0.961	0.0139196	-2.67281	-4.01	-1.6852	GRASP	general receptor for phosphoinositides 1 associated scaffold protein
243788_at	0.961	0.013937	2.67226	-4.01	1.70388
209670_at	0.961	0.0139421	2.67209	-4.01	1.67262	TRAC	T-cell receptor alpha constant
215971_at	0.961	0.0139499	-2.67184	-4.01	-1.40133
243353_at	0.961	0.0139535	2.67172	-4.01	1.46378
211059_s_at	0.961	0.0139572	2.67161	-4.01	1.25773	GOLGA2	golgin A2
1559443_s_at	0.961	0.0139824	2.6708	-4.01	1.12063	IL21R-AS1	IL21R antisense RNA 1
203927_at	0.961	0.0139835	-2.67076	-4.01	-1.16115	NFKBIE	NFKB inhibitor epsilon
208348_s_at	0.961	0.0140488	-2.66868	-4.02	-1.13301	CBLB	Cbl proto-oncogene B
1569154_a_at	0.961	0.0140557	-2.66846	-4.02	-1.45408	GRAMD4	GRAM domain containing 4
240493_at	0.961	0.0140627	2.66824	-4.02	1.39291
1560823_at	0.961	0.0140735	2.66789	-4.02	1.65579	LOC340017	uncharacterized LOC340017
222813_at	0.961	0.0141031	2.66695	-4.02	1.57872	ZNF668	zinc finger protein 668
221379_at	0.961	0.0141292	-2.66613	-4.02	-1.33589
211586_s_at	0.961	0.0141359	2.66591	-4.02	1.64866	ATP2B2	ATPase plasma membrane Ca2+ transporting 2
211013_x_at	0.961	0.0141425	2.6657	-4.02	1.124	PML	promyelocytic leukemia
1557762_at	0.961	0.0141588	2.66519	-4.02	2.03053	LOC105377458	uncharacterized LOC105377458
1552789_at	0.961	0.0141875	2.66428	-4.02	1.05964	SEC62	SEC62 homolog, preprotein translocation factor
1559397_s_at	0.961	0.0141894	2.66422	-4.02	1.32325	PRR14	proline rich 14
205066_s_at	0.961	0.014199	-2.66392	-4.02	-1.24086	ENPP1	ectonucleotide pyrophosphatase/phosphodiesterase 1
220699_s_at	0.961	0.0142087	2.66361	-4.02	1.52368	PRO2214	uncharacterized protein PRO2214
1570078_a_at	0.961	0.0142642	2.66186	-4.02	1.73968	DOCK5	dedicator of cytokinesis 5
205722_s_at	0.961	0.0143204	-2.6601	-4.02	-1.18847	GFRA2	GDNF family receptor alpha 2
214418_at	0.961	0.014328	-2.65986	-4.02	-1.26435	CT62	cancer/testis antigen 62
232838_at	0.961	0.0143281	2.65986	-4.02	1.37136	ASXL3	additional sex combs like 3, transcriptional regulator
201236_s_at	0.961	0.0143355	-2.65963	-4.02	-1.42228	BTG2	BTG anti-proliferation factor 2
237909_at	0.961	0.0143361	2.65961	-4.02	1.30927	ADAM6	ADAM metallopeptidase domain 6 (pseudogene)
230862_at	0.961	0.0144252	2.65683	-4.02	1.25939
1557062_at	0.961	0.0144592	2.65578	-4.02	1.91068	ZSCAN16-AS1	ZSCAN16 antisense RNA 1
241500_at	0.961	0.0144765	2.65524	-4.02	1.74272	CDH8	cadherin 8
1553634_a_at	0.961	0.014487	2.65492	-4.02	1.46973	WEE2-AS1	WEE2 antisense RNA 1
244468_at	0.961	0.0145166	2.654	-4.02	1.10056
1564164_at	0.961	0.0145477	2.65304	-4.02	1.47306	DENND1B	DENN domain containing 1B
235675_at	0.961	0.0145559	2.65279	-4.02	1.13367	DHFR2	dihydrofolate reductase 2
216350_s_at	0.961	0.0145649	-2.65251	-4.02	-1.5264	ZNF10	zinc finger protein 10
222267_at	0.961	0.014577	2.65214	-4.02	1.10033	TMEM209	transmembrane protein 209
231672_at	0.961	0.0145921	2.65167	-4.02	1.21523	LOC100653086	uncharacterized LOC100653086
206036_s_at	0.961	0.0146012	-2.6514	-4.02	-1.13939	REL	REL proto-oncogene, NF-kB subunit
242355_at	0.961	0.0146113	2.65108	-4.02	1.383	CRAMP1	cramped chromatin regulator homolog 1
1556815_at	0.961	0.0146798	-2.64899	-4.02	-1.2945
1566032_at	0.961	0.0146992	2.64839	-4.02	1.43889
34210_at	0.961	0.0147058	2.64819	-4.02	1.571	CD52	CD52 molecule
1566844_at	0.961	0.0147096	2.64807	-4.02	1.08605	PER4	period circadian clock 3 pseudogene
240241_at	0.961	0.0147444	2.64702	-4.02	1.39845
236649_at	0.961	0.0147493	2.64687	-4.02	1.35744	DTWD1	DTW domain containing 1
1560842_a_at	0.961	0.0147555	-2.64668	-4.02	-1.00471	TEX26-AS1	TEX26 antisense RNA 1
229402_at	0.961	0.0148198	2.64472	-4.03	1.34527	SAMD13	sterile alpha motif domain containing 13
243821_at	0.961	0.0148262	-2.64453	-4.03	-1.00094	MRPS31	mitochondrial ribosomal protein S31
1557429_s_at	0.961	0.0148798	2.64291	-4.03	1.57444	FAM227B	family with sequence similarity 227 member B
240234_at	0.961	0.0148862	2.64272	-4.03	1.79149
233271_at	0.961	0.0149178	2.64176	-4.03	1.5395
1566136_at	0.961	0.0150533	2.6377	-4.03	1.38268
224110_at	0.961	0.0150595	-2.63752	-4.03	-1.6512	PRO1804	uncharacterized LOC100133319
212497_at	0.961	0.0150687	2.63724	-4.03	1.72128	MAPK1IP1L	mitogen-activated protein kinase 1 interacting protein 1 like
242955_x_at	0.961	0.0151855	2.63377	-4.03	2.15838
1560516_at	0.961	0.0152104	-2.63303	-4.03	-1.73007	TMEM26-AS1	TMEM26 antisense RNA 1
1559622_at	0.961	0.0152562	2.63168	-4.03	1.82734
239984_at	0.961	0.0152785	2.63102	-4.03	1.53004
206761_at	0.961	0.0152832	2.63088	-4.03	1.33703	CD96	CD96 molecule
243872_at	0.961	0.015307	2.63019	-4.03	1.96961
207992_s_at	0.961	0.0153193	-2.62982	-4.03	-1.29437	AMPD3	adenosine monophosphate deaminase 3
1554004_a_at	0.961	0.0153307	2.62949	-4.03	1.29101	ARHGEF28	Rho guanine nucleotide exchange factor 28
242631_x_at	0.961	0.0154237	2.62677	-4.03	1.73596	DLC1	DLC1 Rho GTPase activating protein
232925_at	0.961	0.0154282	-2.62664	-4.03	-1.85688
242767_at	0.961	0.0154321	-2.62652	-4.03	-1.01552	LMCD1	LIM and cysteine rich domains 1
1568871_at	0.961	0.015437	2.62638	-4.03	2.00906	CADM2-AS1	CADM2 antisense RNA 1
1555379_at	0.961	0.0154535	2.6259	-4.03	1.44201	FAM159A	family with sequence similarity 159 member A
220608_s_at	0.961	0.0155334	2.62357	-4.03	1.35737	ZNF770	zinc finger protein 770
223218_s_at	0.961	0.0155345	-2.62354	-4.03	-1.20785	NFKBIZ	NFKB inhibitor zeta
1565896_at	0.961	0.0155521	2.62303	-4.03	1.55617
227697_at	0.961	0.0155571	-2.62289	-4.03	-1.31909	SOCS3	suppressor of cytokine signaling 3
240619_at	0.961	0.0155773	2.62231	-4.03	1.38798
1554743_x_at	0.961	0.0156392	2.62052	-4.04	1.73225	PMS1	PMS1 homolog 1, mismatch repair system component
215197_at	0.961	0.0156469	2.6203	-4.04	1.70121
243866_x_at	0.961	0.0156751	2.61949	-4.04	1.51683
235506_at	0.961	0.015686	2.61917	-4.04	1.71942
1556400_at	0.961	0.0156988	2.6188	-4.04	1.47867	LOC105378589	uncharacterized LOC105378589
242144_at	0.961	0.0157146	2.61835	-4.04	1.45981
213466_at	0.961	0.0157307	2.61789	-4.04	1.36616	RAB40C	RAB40C, member RAS oncogene family
220719_at	0.961	0.0157362	-2.61773	-4.04	-1.54931
216454_at	0.961	0.0157581	2.6171	-4.04	1.91345	TRMT1	tRNA methyltransferase 1
229292_at	0.961	0.0157766	-2.61658	-4.04	-1.20375	EPB41L5	erythrocyte membrane protein band 4.1 like 5
236198_at	0.961	0.0157951	-2.61605	-4.04	-2.21373	LINC01215	long intergenic non-protein coding RNA 1215
218502_s_at	0.961	0.0158004	2.6159	-4.04	1.10499	TRPS1	transcriptional repressor GATA binding 1
1561497_at	0.961	0.0158084	-2.61567	-4.04	-1.38966	MIR3180-2///MIR3180-1///MIR3180-3	microRNA 3180-2///microRNA 3180-1///microRNA 3180-3
238244_at	0.961	0.0158112	2.61559	-4.04	1.35327	LINC00535	long intergenic non-protein coding RNA 535
227137_at	0.961	0.015833	2.61497	-4.04	1.46202	CACUL1	CDK2 associated cullin domain 1
208415_x_at	0.961	0.0158352	-2.61491	-4.04	-1.0469	ING1	inhibitor of growth family member 1
1556332_at	0.961	0.0158724	-2.61385	-4.04	-1.77622
1563351_at	0.961	0.015972	2.61103	-4.04	1.85692
1560929_at	0.961	0.0160109	-2.60993	-4.04	-1.47724
235357_at	0.961	0.0160616	-2.6085	-4.04	-1.51578	DPF3	double PHD fingers 3
232687_at	0.961	0.0161138	2.60704	-4.04	2.13543	GPRIN3	GPRIN family member 3
209239_at	0.961	0.0161259	-2.6067	-4.04	-1.19174	NFKB1	nuclear factor kappa B subunit 1
208422_at	0.961	0.0161705	-2.60545	-4.04	-1.03525	MSR1	macrophage scavenger receptor 1
213310_at	0.961	0.0161881	-2.60496	-4.04	-1.0672	CASC7///AGO2	cancer susceptibility candidate 7 (non-protein coding)///argonaute 2, RISC catalytic component
1564685_a_at	0.961	0.0162511	2.60321	-4.04	1.63939	PACRG-AS2	PACRG antisense RNA 2
201465_s_at	0.961	0.0162804	-2.60239	-4.04	-1.08704	JUN	Jun proto-oncogene, AP-1 transcription factor subunit
1569064_at	0.961	0.016289	2.60215	-4.04	1.06274	C15orf62	chromosome 15 open reading frame 62
238712_at	0.961	0.0162898	2.60213	-4.04	1.08751
211205_x_at	0.961	0.0163409	-2.60072	-4.04	-1.51005	PIP5K1A	phosphatidylinositol-4-phosphate 5-kinase type 1 alpha
240578_at	0.961	0.0163691	2.59994	-4.04	1.53077	LINC00836	long intergenic non-protein coding RNA 836
226708_at	0.961	0.0163941	2.59925	-4.04	1.07789	NAPRT	nicotinate phosphoribosyltransferase
1556006_s_at	0.961	0.0164196	-2.59855	-4.04	-1.04721	CSNK1A1	casein kinase 1 alpha 1
231502_at	0.961	0.0164331	2.59818	-4.04	1.29986
219677_at	0.961	0.0164362	-2.59809	-4.04	-1.35526	SPSB1	splA/ryanodine receptor domain and SOCS box containing 1
211513_s_at	0.961	0.0164661	2.59727	-4.05	1.2503	OGFR	opioid growth factor receptor
208539_x_at	0.961	0.0164677	2.59723	-4.05	1.252	SPRR2B	small proline rich protein 2B
231898_x_at	0.961	0.0164764	2.59699	-4.05	1.78149	SOX2-OT	SOX2 overlapping transcript
1568820_a_at	0.961	0.0165548	2.59484	-4.05	1.30334	BEND6	BEN domain containing 6
211045_s_at	0.961	0.0165768	2.59424	-4.05	1.26665	KCNH6	potassium voltage-gated channel subfamily H member 6
206812_at	0.961	0.0165945	2.59376	-4.05	1.34338	ADRB3	adrenoceptor beta 3
1563498_s_at	0.961	0.016595	-2.59375	-4.05	-1.49355	SLC25A45	solute carrier family 25 member 45
231216_at	0.961	0.0166267	2.59288	-4.05	1.33081	TMEM179	transmembrane protein 179
1561969_at	0.961	0.0166635	2.59188	-4.05	1.67212	ZPLD1	zona pellucida like domain containing 1
238246_at	0.961	0.0166713	2.59167	-4.05	1.6592	TESMIN	testis expressed metallothionein like protein
233126_s_at	0.961	0.0166804	2.59142	-4.05	1.68194	OLAH	oleoyl-ACP hydrolase
1556322_a_at	0.961	0.0166807	2.59142	-4.05	1.28594
220405_at	0.961	0.01669	2.59116	-4.05	1.48521	SNTG1	syntrophin gamma 1
238335_at	0.961	0.0167431	2.58973	-4.05	1.04078	DNAJC21	DnaJ heat shock protein family (Hsp40) member C21
1557595_at	0.961	0.0167597	-2.58928	-4.05	-1.21269	GINS2	GINS complex subunit 2
1564632_at	0.961	0.0167713	2.58897	-4.05	1.60213
206317_s_at	0.961	0.016839	2.58714	-4.05	1.35198	ABCB8	ATP binding cassette subfamily B member 8
234101_at	0.961	0.0168457	2.58696	-4.05	1.44816
238266_at	0.961	0.0168797	2.58605	-4.05	1.57182
209288_s_at	0.961	0.0168811	-2.58602	-4.05	-1.29017	CDC42EP3	CDC42 effector protein 3
214567_s_at	0.961	0.0168858	2.58589	-4.05	1.15921	XCL2///XCL1	X-C motif chemokine ligand 2///X-C motif chemokine ligand 1
214627_at	0.961	0.0169453	2.5843	-4.05	1.15196	EPX	eosinophil peroxidase
240309_at	0.961	0.0169506	2.58415	-4.05	1.2453
244832_at	0.961	0.0169668	2.58372	-4.05	1.24093
206973_at	0.961	0.0170082	-2.58262	-4.05	-1.38851	PPFIA2	PTPRF interacting protein alpha 2
210746_s_at	0.961	0.0170236	2.58221	-4.05	1.38962	EPB42	erythrocyte membrane protein band 4.2
231179_at	0.961	0.017024	-2.5822	-4.05	-1.42759	IP6K3	inositol hexakisphosphate kinase 3
239796_x_at	0.961	0.0170902	2.58044	-4.05	1.32857	TIRAP	TIR domain containing adaptor protein
232724_at	0.961	0.0171141	2.57981	-4.05	1.54783	MS4A6A	membrane spanning 4-domains A6A
225160_x_at	0.961	0.0171244	-2.57953	-4.05	-1.05146	MDM2	MDM2 proto-oncogene
210801_at	0.961	0.0171406	2.57911	-4.05	1.02797	DIMT1	DIM1 dimethyladenosine transferase 1 homolog
208888_s_at	0.961	0.0171477	2.57892	-4.05	1.42602	NCOR2	nuclear receptor corepressor 2
1561476_at	0.961	0.0171553	2.57872	-4.05	1.62488	CASC6	cancer susceptibility candidate 6 (non-protein coding)
242693_at	0.961	0.0171611	2.57856	-4.05	1.4177
235839_at	0.961	0.0171821	2.57801	-4.05	1.48005	C22orf34	chromosome 22 open reading frame 34
1562923_at	0.961	0.0172309	2.57673	-4.05	1.62497	LOC101928449	uncharacterized LOC101928449
243114_at	0.961	0.0172339	2.57665	-4.05	1.31511
223129_x_at	0.961	0.0172928	-2.5751	-4.05	-1.46772	MYLIP	myosin regulatory light chain interacting protein
220594_at	0.961	0.0172932	2.57509	-4.05	1.01717	OGT	O-linked N-acetylglucosamine (GlcNAc) transferase
1553385_at	0.961	0.0172966	2.575	-4.05	1.68243	LINC01101	long intergenic non-protein coding RNA 1101
1561250_at	0.961	0.0172986	2.57495	-4.05	1.41544
234010_at	0.961	0.0173358	2.57397	-4.06	1.39187
235165_at	0.961	0.0173712	-2.57305	-4.06	-1.26948	PARD6B	par-6 family cell polarity regulator beta
224728_at	0.961	0.0173826	2.57275	-4.06	1.03573	ATPAF1	ATP synthase mitochondrial F1 complex assembly factor 1
211122_s_at	0.961	0.0174136	-2.57194	-4.06	-1.71492	CXCL11	C-X-C motif chemokine ligand 11
228153_at	0.961	0.0174152	-2.5719	-4.06	-1.285	RNF144B	ring finger protein 144B
228425_at	0.961	0.0174172	-2.57185	-4.06	-1.61904	PAX8-AS1	PAX8 antisense RNA 1
231660_at	0.961	0.0174288	2.57155	-4.06	1.28867
1555434_a_at	0.961	0.0174578	-2.57079	-4.06	-1.33827	SLC39A14	solute carrier family 39 member 14
214192_at	0.961	0.0175001	2.5697	-4.06	1.46158	NUP88	nucleoporin 88
1558437_at	0.961	0.0175106	2.56942	-4.06	1.28979
216134_at	0.961	0.0175265	2.56901	-4.06	1.45905	FRMD4B	FERM domain containing 4B
1552531_a_at	0.961	0.017598	-2.56717	-4.06	-1.18844	NLRP11	NLR family pyrin domain containing 11
243979_at	0.961	0.0176368	2.56617	-4.06	1.85458
1558944_at	0.961	0.0176675	2.56538	-4.06	1.41813	LOC100507353///CACNA1A	uncharacterized LOC100507353///calcium voltage-gated channel subunit alpha1 A
1552424_at	0.961	0.0176889	-2.56483	-4.06	-1.30166	KLHL10	kelch like family member 10
222299_x_at	0.961	0.0176926	2.56473	-4.06	1.52003
209914_s_at	0.961	0.0176983	2.56459	-4.06	1.62077	NRXN1	neurexin 1
215508_at	0.961	0.0178001	2.56198	-4.06	1.8747	BUB1	BUB1 mitotic checkpoint serine/threonine kinase
229646_at	0.961	0.0178071	2.5618	-4.06	1.6394	SOBP	sine oculis binding protein homolog
237219_at	0.961	0.0178109	2.56171	-4.06	1.78856	LOC101928259	uncharacterized LOC101928259
230104_s_at	0.961	0.0178304	-2.56121	-4.06	-1.44603	TPPP	tubulin polymerization promoting protein
227481_at	0.961	0.0179512	-2.55814	-4.06	-1.97676	CNKSR3	CNKSR family member 3
207295_at	0.961	0.0179557	2.55803	-4.06	1.23256	SCNN1G	sodium channel epithelial 1 gamma subunit
207580_at	0.961	0.0179774	-2.55748	-4.06	-1.62156	MAGEB4	MAGE family member B4
229985_at	0.961	0.0180055	2.55677	-4.06	1.63222	BTNL9	butyrophilin like 9
207603_at	0.961	0.018007	-2.55673	-4.06	-1.34311	SLC4A7	solute carrier family 4 member 7
1567013_at	0.961	0.0180451	2.55577	-4.06	1.37426	NFE2L2	nuclear factor, erythroid 2 like 2
223130_s_at	0.961	0.0180661	-2.55524	-4.06	-1.57831	MYLIP	myosin regulatory light chain interacting protein
233364_s_at	0.961	0.0180907	2.55462	-4.06	1.13322
209734_at	0.961	0.0181192	2.55391	-4.06	1.16384	NCKAP1L	NCK associated protein 1 like
229445_at	0.961	0.018129	2.55366	-4.06	1.13164	CYBA	cytochrome b-245 alpha chain
1555964_at	0.961	0.0182277	2.55119	-4.06	1.11509	ARL17B///ARL17A	ADP ribosylation factor like GTPase 17B///ADP ribosylation factor like GTPase 17A
230906_at	0.961	0.0182291	2.55116	-4.06	1.33535	GALNT10	polypeptide N-acetylgalactosaminyltransferase 10
216252_x_at	0.961	0.0182814	-2.54985	-4.07	-1.32299	FAS	Fas cell surface death receptor
204470_at	0.961	0.0182913	-2.54961	-4.07	-1.29603	CXCL1	C-X-C motif chemokine ligand 1
214956_at	0.961	0.018297	2.54947	-4.07	1.87457	AAK1	AP2 associated kinase 1
1560347_at	0.961	0.0183087	2.54918	-4.07	1.16026
236425_at	0.961	0.018324	2.5488	-4.07	1.35003
206715_at	0.961	0.0183348	2.54853	-4.07	1.39244	TFEC	transcription factor EC
228474_s_at	0.961	0.0183441	-2.5483	-4.07	-1.33348	KLF9	Kruppel like factor 9
1556398_a_at	0.961	0.0183783	2.54745	-4.07	1.37978
1557029_at	0.961	0.0183797	2.54742	-4.07	1.81628	HMMR-AS1	HMMR antisense RNA 1
1562247_at	0.961	0.018403	-2.54684	-4.07	-1.14845	LOC286058	uncharacterized LOC286058
216324_at	0.961	0.0184287	2.5462	-4.07	1.15801
244551_at	0.961	0.018438	2.54597	-4.07	1.39546	ZNF736	zinc finger protein 736
1563638_at	0.961	0.0184621	-2.54538	-4.07	-1.38736	TVP23A	trans-golgi network vesicle protein 23 homolog A
210161_at	0.961	0.0185153	2.54407	-4.07	1.3887	NFATC1	nuclear factor of activated T-cells 1
242756_at	0.961	0.0185155	2.54406	-4.07	1.94995
229139_at	0.961	0.018544	-2.54336	-4.07	-1.09607	JPH1	junctophilin 1
206171_at	0.961	0.0185502	2.54321	-4.07	1.5189	ADORA3	adenosine A3 receptor
1559589_a_at	0.961	0.018555	2.54309	-4.07	1.25585
213903_s_at	0.961	0.0185795	2.54249	-4.07	1.00827	CNOT9	CCR4-NOT transcription complex subunit 9
210279_at	0.961	0.0186033	2.54191	-4.07	1.7357	GPR18	G protein-coupled receptor 18
1560898_at	0.961	0.0186067	2.54183	-4.07	1.56133	LOC105378997	basic salivary proline-rich protein 2
207906_at	0.961	0.0186924	2.53973	-4.07	1.40592	IL3	interleukin 3
205780_at	0.961	0.0187133	-2.53923	-4.07	-1.70633	BIK	BCL2 interacting killer
207607_at	0.961	0.0187159	2.53916	-4.07	1.33945	ASCL2	achaete-scute family bHLH transcription factor 2
1567247_at	0.961	0.0187255	2.53893	-4.07	1.69261	OR5H1	olfactory receptor family 5 subfamily H member 1
244802_at	0.961	0.0187301	2.53882	-4.07	1.24808
222943_at	0.961	0.0187452	2.53845	-4.07	1.36304	GBA3	glucosylceramidase beta 3 (gene/pseudogene)
238256_at	0.961	0.0187524	2.53828	-4.07	1.15868
234210_x_at	0.961	0.018767	2.53792	-4.07	1.23982	ACTR2	ARP2 actin related protein 2 homolog
219782_s_at	0.961	0.0187823	2.53755	-4.07	1.58268	ZNF771	zinc finger protein 771
226086_at	0.961	0.0188116	2.53684	-4.07	1.12978	SYT13	synaptotagmin 13
217170_at	0.961	0.018813	-2.5368	-4.07	-1.57426
1569603_at	0.961	0.018828	2.53644	-4.07	1.58689
204787_at	0.961	0.0188582	2.53571	-4.07	1.54597	VSIG4	V-set and immunoglobulin domain containing 4
1559000_at	0.961	0.0188659	-2.53552	-4.07	-1.58484	PRR26	proline rich 26
202992_at	0.961	0.0188784	2.53522	-4.07	1.32084	C7	complement component 7
1560939_at	0.961	0.0189202	2.53421	-4.07	1.02799	PCOLCE-AS1	PCOLCE antisense RNA 1
229047_at	0.961	0.0189399	2.53374	-4.07	1.06046	PLEKHB1	pleckstrin homology domain containing B1
216418_at	0.961	0.0189406	2.53372	-4.07	1.44638
241291_at	0.961	0.0189813	2.53274	-4.07	1.70367	LINC01541	long intergenic non-protein coding RNA 1541
219605_at	0.961	0.0190021	2.53225	-4.07	1.47401	ZNF3	zinc finger protein 3
225939_at	0.961	0.0190112	2.53203	-4.07	1.07043	EIF4E3	eukaryotic translation initiation factor 4E family member 3
237112_at	0.961	0.0190116	2.53202	-4.07	1.55305
240584_at	0.961	0.0190199	2.53182	-4.07	1.34283	SHANK2-AS2	SHANK2 antisense RNA 2
220197_at	0.961	0.0191054	2.52977	-4.07	1.31727	ATP6V0A4	ATPase H+ transporting V0 subunit a4
1562276_at	0.961	0.0191058	2.52976	-4.07	1.81163
231585_at	0.961	0.019125	-2.5293	-4.07	-1.41281	VPS13A	vacuolar protein sorting 13 homolog A
235082_at	0.961	0.0191277	2.52924	-4.07	1.11368	PCNX1	pecanex homolog 1 (Drosophila)
1554608_at	0.961	0.0191513	2.52868	-4.07	1.01711	TGOLN2	trans-golgi network protein 2
1560303_at	0.961	0.019157	2.52854	-4.07	1.57102	FKBP4	FK506 binding protein 4
231049_at	0.961	0.0191679	2.52828	-4.07	1.56319	LMO2	LIM domain only 2
243693_at	0.961	0.0192095	-2.52729	-4.07	-1.22874
235795_at	0.961	0.0192152	2.52716	-4.07	1.6217	PAX6	paired box 6
217536_x_at	0.961	0.019246	2.52643	-4.08	1.61097
210001_s_at	0.961	0.0192566	-2.52618	-4.08	-1.31374	SOCS1	suppressor of cytokine signaling 1
208293_x_at	0.961	0.0192907	2.52537	-4.08	1.3258	CSHL1	chorionic somatomammotropin hormone like 1
204371_s_at	0.961	0.0193148	2.5248	-4.08	1.13588	KHSRP	KH-type splicing regulatory protein
242591_at	0.961	0.0193449	2.52409	-4.08	1.41306	DNAH1	dynein axonemal heavy chain 1
244111_at	0.961	0.0193734	2.52341	-4.08	1.70723	KRT222	keratin 222
237173_at	0.961	0.0194014	2.52276	-4.08	1.45673	LOC100132057	phosphodiesterase 4D interacting protein pseudogene
230840_at	0.961	0.019402	2.52274	-4.08	1.01121	SMIM1	small integral membrane protein 1 (Vel blood group)
216920_s_at	0.961	0.0194258	2.52218	-4.08	1.89081	TARP///TRGV9///TRGC2	TCR gamma alternate reading frame protein///T cell receptor gamma variable 9///T cell receptor gamma constant 2
1557905_s_at	0.961	0.0194682	-2.52118	-4.08	-1.01629	CD44	CD44 molecule (Indian blood group)
234227_at	0.961	0.0195161	2.52006	-4.08	1.47269
230464_at	0.961	0.0195212	2.51994	-4.08	1.40893	S1PR5	sphingosine-1-phosphate receptor 5
229477_at	0.961	0.0195226	2.51991	-4.08	1.12614	THRSP	thyroid hormone responsive
235916_at	0.961	0.0195291	-2.51976	-4.08	-1.63086	YPEL4	yippee like 4
233613_x_at	0.961	0.0195708	2.51878	-4.08	1.67036	REXO2	RNA exonuclease 2
237990_x_at	0.961	0.0195779	2.51862	-4.08	1.19834	CACTIN	cactin, spliceosome C complex subunit
228186_s_at	0.961	0.0196185	-2.51767	-4.08	-1.43952	RSPO3	R-spondin 3
219657_s_at	0.961	0.0196249	-2.51752	-4.08	-1.14784	KLF3	Kruppel like factor 3
1570152_at	0.961	0.0196266	2.51748	-4.08	1.76256
237944_at	0.961	0.0196718	2.51643	-4.08	1.38149
204897_at	0.961	0.019681	-2.51622	-4.08	-1.4897	PTGER4	prostaglandin E receptor 4
205403_at	0.961	0.0196889	-2.51603	-4.08	-1.39182	IL1R2	interleukin 1 receptor type 2
1564964_at	0.961	0.0197202	2.51531	-4.08	1.9207
1560695_at	0.961	0.019727	2.51515	-4.08	1.65302	QTRT2	queuine tRNA-ribosyltransferase accessory subunit 2
234065_at	0.961	0.0197634	2.51431	-4.08	1.29965
220118_at	0.961	0.0197902	2.51369	-4.08	1.17011	ZBTB32	zinc finger and BTB domain containing 32
224134_at	0.961	0.0198655	2.51195	-4.08	1.18694	MGC10814	uncharacterized protein MGC10814
205098_at	0.961	0.0199079	2.51098	-4.08	1.84462	CCR1	C-C motif chemokine receptor 1
220512_at	0.961	0.0199083	2.51097	-4.08	1.58233	DLC1	DLC1 Rho GTPase activating protein
230927_at	0.961	0.019915	2.51081	-4.08	1.57754
230870_at	0.961	0.0199174	2.51076	-4.08	1.39082	CFL1	cofilin 1
1554866_at	0.961	0.0199203	2.51069	-4.08	1.91335	TMEM135	transmembrane protein 135
239595_at	0.961	0.019929	2.51049	-4.08	1.16937	GPX2	glutathione peroxidase 2
236739_at	0.961	0.0199855	-2.5092	-4.08	-2.27677	LINC01105	long intergenic non-protein coding RNA 1105
243532_at	0.961	0.0200062	2.50872	-4.08	1.36971	LNPEP	leucyl and cystinyl aminopeptidase
205859_at	0.961	0.0200133	2.50856	-4.08	1.36374	LY86	lymphocyte antigen 86
1557674_s_at	0.961	0.0200159	2.5085	-4.08	1.38644	LOC101928068	uncharacterized LOC101928068
240845_at	0.961	0.0200253	2.50828	-4.08	1.78922
244419_at	0.961	0.0200422	2.5079	-4.08	1.17095	FRZB	frizzled-related protein
229340_at	0.961	0.0200889	2.50683	-4.08	1.1832	NKAPL	NFKB activating protein like
229518_at	0.961	0.0200916	-2.50677	-4.08	-1.39647	FAM46B	family with sequence similarity 46 member B
230594_at	0.961	0.0200963	2.50667	-4.08	1.66101
213299_at	0.961	0.0201829	2.5047	-4.08	1.60138	ZBTB7A	zinc finger and BTB domain containing 7A
1559617_at	0.961	0.0202002	-2.50431	-4.08	-1.62137	LOC101927206	uncharacterized LOC101927206
231063_at	0.961	0.0202202	2.50385	-4.08	1.98932
239311_at	0.961	0.0202206	2.50384	-4.08	1.20123
240242_at	0.961	0.0202237	2.50377	-4.08	1.18467
232409_x_at	0.961	0.0202687	2.50275	-4.08	1.39049	FBXL16	F-box and leucine rich repeat protein 16
214023_x_at	0.961	0.02031	-2.50182	-4.09	-1.58337	TUBB2B	tubulin beta 2B class IIb
227202_at	0.961	0.0203365	2.50122	-4.09	1.63177	CNTN1	contactin 1
244233_at	0.961	0.0203387	2.50117	-4.09	1.05509	TPGS2	tubulin polyglutamylase complex subunit 2
222670_s_at	0.961	0.0203511	-2.50089	-4.09	-1.09593	MAFB	MAF bZIP transcription factor B
204318_s_at	0.961	0.0203885	2.50005	-4.09	1.01721	GTSE1	G2 and S-phase expressed 1
236038_at	0.961	0.0204016	2.49976	-4.09	1.92337	RNF150	ring finger protein 150
1568685_at	0.961	0.0204044	-2.4997	-4.09	-1.67754
241729_at	0.961	0.0204127	2.49951	-4.09	1.33524	DOK6	docking protein 6
1556331_a_at	0.961	0.0204215	2.49931	-4.09	1.79495
206354_at	0.961	0.0204417	2.49886	-4.09	1.61015	SLCO1B3	solute carrier organic anion transporter family member 1B3
243778_at	0.961	0.0204458	2.49877	-4.09	1.44743
1560286_s_at	0.961	0.0204685	2.49826	-4.09	1.22971	LOC101928955	uncharacterized LOC101928955
1555914_a_at	0.961	0.0204992	2.49757	-4.09	1.17643	EXD3	exonuclease 3'-5' domain containing 3
242411_at	0.961	0.0205995	2.49533	-4.09	1.71868	ARL10	ADP ribosylation factor like GTPase 10
1557647_a_at	0.961	0.0206033	2.49525	-4.09	1.77276	VWA8-AS1	VWA8 antisense RNA 1 (head to head)
1558740_s_at	0.961	0.020609	2.49512	-4.09	1.52877	LOC105369662	uncharacterized LOC105369662
230250_at	0.961	0.0206228	2.49482	-4.09	1.53017	PTPRB	protein tyrosine phosphatase, receptor type B
1569146_s_at	0.961	0.0206364	2.49452	-4.09	1.52217	SOGA3///KIAA0408	SOGA family member 3///KIAA0408
1553348_a_at	0.961	0.0206511	-2.49419	-4.09	-1.25094	NFX1	nuclear transcription factor, X-box binding 1
244568_at	0.961	0.0206599	2.49399	-4.09	2.05705
206972_s_at	0.961	0.0206795	2.49356	-4.09	1.29641	GPR161	G protein-coupled receptor 161
1563902_at	0.961	0.0206832	-2.49348	-4.09	-2.04137
228854_at	0.961	0.0206904	2.49332	-4.09	1.5761
1569923_s_at	0.961	0.0206906	2.49331	-4.09	1.34886	LINC00491	long intergenic non-protein coding RNA 491
1563142_at	0.961	0.0207054	2.49298	-4.09	1.31816	LOC105373418	uncharacterized LOC105373418
241440_at	0.961	0.0207143	2.49279	-4.09	1.66915	LOC440982///ZIC1	uncharacterized LOC440982///Zic family member 1
212865_s_at	0.961	0.0208236	2.49037	-4.09	1.28655	COL14A1	collagen type XIV alpha 1 chain
230955_s_at	0.961	0.0208272	-2.49029	-4.09	-1.18198	NOL4L	nucleolar protein 4 like
236291_at	0.961	0.020828	2.49028	-4.09	1.74697	RDH5	retinol dehydrogenase 5
234468_at	0.961	0.0208721	2.4893	-4.09	1.15187
233709_at	0.961	0.0209566	2.48745	-4.09	1.55088
222320_at	0.961	0.0209794	2.48695	-4.09	1.07729
1559696_at	0.961	0.0209821	2.48689	-4.09	1.71503
236761_at	0.961	0.0210083	2.48632	-4.09	1.2	LHFPL3	lipoma HMGIC fusion partner-like 3
204472_at	0.961	0.0210355	-2.48573	-4.09	-1.89516	GEM	GTP binding protein overexpressed in skeletal muscle
1553465_a_at	0.961	0.0211067	2.48417	-4.09	1.38306	CES5A	carboxylesterase 5A
216796_s_at	0.961	0.0211434	2.48337	-4.09	1.51444
244226_s_at	0.961	0.0211497	2.48324	-4.09	1.55526
236358_at	0.961	0.0212053	-2.48203	-4.09	-1.29738
234264_at	0.961	0.0212238	2.48163	-4.09	1.10094
1559902_at	0.961	0.0212594	-2.48086	-4.09	-1.15285	MKL1	megakaryoblastic leukemia (translocation) 1
220284_at	0.961	0.0212968	2.48005	-4.09	1.25666	DKKL1	dickkopf like acrosomal protein 1
243605_at	0.961	0.021313	2.4797	-4.09	1.7892
209641_s_at	0.961	0.0213154	2.47965	-4.09	1.16904	ABCC3	ATP binding cassette subfamily C member 3
227613_at	0.961	0.0213732	-2.47841	-4.1	-1.08557	ZNF331	zinc finger protein 331
1563132_at	0.961	0.0213985	2.47786	-4.1	1.62421	LINC01169	long intergenic non-protein coding RNA 1169
231885_at	0.961	0.0214262	2.47727	-4.1	1.28909	ZNF451	zinc finger protein 451
230653_at	0.961	0.0214726	2.47627	-4.1	1.33235
230181_at	0.961	0.0214854	2.476	-4.1	1.26222	PQLC1	PQ loop repeat containing 1
230148_at	0.961	0.0215036	2.47561	-4.1	1.53874	AHSA2	AHA1, activator of heat shock 90kDa protein ATPase homolog 2 (yeast)
202999_s_at	0.961	0.0215132	-2.47541	-4.1	-1.27249	LOXL2	lysyl oxidase like 2
237873_s_at	0.961	0.0215277	2.4751	-4.1	1.49343
1554689_a_at	0.961	0.0215975	2.47361	-4.1	1.04982	NLGN4X	neuroligin 4, X-linked
242549_at	0.961	0.0216035	2.47348	-4.1	1.35742	PRKD3	protein kinase D3
1558859_at	0.961	0.0216234	-2.47306	-4.1	-1.40854	LOC101928623///LOC401320	uncharacterized LOC101928623///uncharacterized LOC401320
243195_s_at	0.961	0.0216985	2.47146	-4.1	1.6371	ZNF551	zinc finger protein 551
204990_s_at	0.961	0.0217168	-2.47107	-4.1	-1.50126	ITGB4	integrin subunit beta 4
1561962_at	0.961	0.021731	2.47077	-4.1	1.93213
238887_at	0.961	0.021774	2.46986	-4.1	1.4331	PARTICL	promoter of MAT2A antisense radiation-induced circulating long non-coding RNA
1560905_at	0.961	0.0217995	2.46932	-4.1	1.52246
221296_at	0.961	0.0218006	2.4693	-4.1	1.4957	TECTA	tectorin alpha
210955_at	0.961	0.0218184	-2.46892	-4.1	-1.27242	CASP10	caspase 10
228877_at	0.961	0.0218195	2.4689	-4.1	1.27513	RGL3	ral guanine nucleotide dissociation stimulator like 3
1561754_at	0.961	0.0218296	2.46869	-4.1	1.62346
215857_at	0.961	0.0218584	2.46808	-4.1	1.52217	NCLN	nicalin
206799_at	0.961	0.0218754	2.46772	-4.1	1.38239	SCGB1D2	secretoglobin family 1D member 2
214854_at	0.961	0.0219231	2.46672	-4.1	1.87607
230741_at	0.961	0.021947	-2.46622	-4.1	-1.5109	P2RX7	purinergic receptor P2X 7
1555229_a_at	0.961	0.0219507	-2.46614	-4.1	-1.51653	C1S	complement component 1, s subcomponent
230910_s_at	0.961	0.0219707	-2.46572	-4.1	-1.62476	LOC100288181	uncharacterized LOC100288181
211124_s_at	0.961	0.0219821	-2.46548	-4.1	-1.41433	KITLG	KIT ligand
216502_at	0.961	0.0219844	2.46543	-4.1	1.33387	ISG20L2	interferon stimulated exonuclease gene 20 like 2
236756_at	0.961	0.0220365	2.46434	-4.1	1.30362	CENPVL2///CENPVL1	centromere protein V like 2///centromere protein V like 1
244826_at	0.961	0.0220395	2.46428	-4.1	1.13634
241610_x_at	0.961	0.0221422	2.46214	-4.1	1.35711
1553433_at	0.961	0.0221694	2.46157	-4.1	1.7465	CCDC171	coiled-coil domain containing 171
208092_s_at	0.961	0.0221743	-2.46147	-4.1	-1.20861	FAM49A	family with sequence similarity 49 member A
204285_s_at	0.961	0.0222019	-2.4609	-4.1	-1.41475	PMAIP1	phorbol-12-myristate-13-acetate-induced protein 1
227300_at	0.961	0.0222381	-2.46015	-4.1	-1.30548	TMEM119	transmembrane protein 119
220773_s_at	0.961	0.0222421	-2.46007	-4.1	-1.49001	GPHN	gephyrin
219539_at	0.961	0.0222672	2.45955	-4.1	1.16078	GEMIN6	gem nuclear organelle associated protein 6
229172_at	0.961	0.0223033	2.4588	-4.1	1.13635	HSPA12B	heat shock protein family A (Hsp70) member 12B
236216_at	0.961	0.0223214	2.45843	-4.1	1.16798
240360_at	0.961	0.0223285	2.45828	-4.1	1.09035	BRD4	bromodomain containing 4
215282_at	0.961	0.0223548	2.45773	-4.1	1.35342	ANAPC13	anaphase promoting complex subunit 13
227488_at	0.961	0.0223626	2.45757	-4.1	1.40997	MIR503///MIR424///MIR503HG	microRNA 503///microRNA 424///MIR503 host gene
1559685_at	0.961	0.0224246	2.4563	-4.1	1.75947	LOC100506379	uncharacterized LOC100506379
1553045_at	0.961	0.0224302	2.45618	-4.1	1.02915	WNT9A	Wnt family member 9A
1554920_at	0.961	0.0224826	2.45511	-4.1	1.60685	SCEL	sciellin
1556781_at	0.961	0.0224922	2.45491	-4.1	1.73012
210260_s_at	0.961	0.022495	-2.45485	-4.1	-1.56909	TNFAIP8	TNF alpha induced protein 8
203574_at	0.961	0.0225077	-2.45459	-4.11	-1.04153	NFIL3	nuclear factor, interleukin 3 regulated
221113_s_at	0.961	0.0225237	2.45426	-4.11	1.41718	WNT16	Wnt family member 16
232735_at	0.961	0.0225271	2.45419	-4.11	1.59816	ANKRD34A	ankyrin repeat domain 34A
1556694_a_at	0.961	0.0225601	2.45352	-4.11	1.82671
1552482_at	0.961	0.0225713	2.45329	-4.11	1.537	RAPH1	Ras association (RalGDS/AF-6) and pleckstrin homology domains 1
1555928_at	0.961	0.0225844	2.45302	-4.11	1.31533
215671_at	0.961	0.0225964	2.45278	-4.11	1.60463	PDE4B	phosphodiesterase 4B
204754_at	0.961	0.0226011	-2.45268	-4.11	-1.50999	HLF	HLF, PAR bZIP transcription factor
212230_at	0.961	0.0226031	-2.45264	-4.11	-1.56284	PLPP3	phospholipid phosphatase 3
1554378_a_at	0.961	0.0226096	2.45251	-4.11	1.49219	PDE1C	phosphodiesterase 1C
232830_at	0.961	0.0226169	2.45236	-4.11	1.53924	RNF32	ring finger protein 32
222831_at	0.961	0.0226246	-2.4522	-4.11	-1.16694	SAP30L	SAP30 like
237130_at	0.961	0.0227138	2.45038	-4.11	1.83562
203523_at	0.961	0.0227428	2.44979	-4.11	1.34076	LSP1	lymphocyte-specific protein 1
233523_at	0.961	0.0227625	2.4494	-4.11	1.27716	BPIFB4	BPI fold containing family B member 4
221355_at	0.961	0.0228066	2.4485	-4.11	1.48351	CHRNG	cholinergic receptor nicotinic gamma subunit
240284_x_at	0.961	0.0228656	2.44731	-4.11	1.32376	LOC105369635	uncharacterized LOC105369635
228518_at	0.961	0.022942	-2.44577	-4.11	-1.21301	LOC102725426///MIR8071-2///MIR8071-1///IGHM///IGHG1	uncharacterized LOC102725426///microRNA 8071-2///microRNA 8071-1///immunoglobulin heavy constant mu///immunoglobulin heavy constant gamma 1 (G1m marker)
221709_s_at	0.961	0.0229558	2.44549	-4.11	1.20969	ZNF839	zinc finger protein 839
1558122_s_at	0.961	0.0229644	2.44532	-4.11	1.34524	CSRNP3	cysteine and serine rich nuclear protein 3
1561924_at	0.961	0.0229693	2.44522	-4.11	1.47323
228343_at	0.961	0.022993	-2.44474	-4.11	-1.16574	POU2F2	POU class 2 homeobox 2
221450_x_at	0.961	0.0230023	2.44456	-4.11	1.23648	PCDHB13	protocadherin beta 13
237204_at	0.961	0.0230423	-2.44375	-4.11	-1.56507
240517_at	0.961	0.0230794	2.44301	-4.11	1.22127	CBS	cystathionine-beta-synthase
1561657_at	0.961	0.0230895	2.44281	-4.11	2.06848
232046_at	0.961	0.0231185	-2.44223	-4.11	-1.00291	KIAA1217	KIAA1217
210692_s_at	0.961	0.0231365	-2.44187	-4.11	-1.08021	SLC43A3	solute carrier family 43 member 3
229935_s_at	0.961	0.0231478	2.44164	-4.11	1.22777	KMT2A	lysine methyltransferase 2A
230834_at	0.961	0.0231722	2.44115	-4.11	1.5821
1558210_at	0.961	0.0232407	-2.43979	-4.11	-1.54384	SRC	SRC proto-oncogene, non-receptor tyrosine kinase
237636_at	0.961	0.0232513	2.43958	-4.11	1.05198	PPP2R2A	protein phosphatase 2 regulatory subunit Balpha
236403_at	0.961	0.0232692	2.43922	-4.11	1.37417	THAP7-AS1	THAP7 antisense RNA 1
244088_at	0.961	0.0233196	2.43822	-4.11	1.25446
1556920_s_at	0.961	0.0233266	2.43808	-4.11	1.289	LINC01330	long intergenic non-protein coding RNA 1330
213208_at	0.961	0.0233648	2.43733	-4.11	1.2144	GLTSCR1L	GLTSCR1 like
215953_at	0.961	0.0234001	2.43663	-4.11	1.28635	SMG7-AS1	SMG7 antisense RNA 1
240355_at	0.961	0.0234234	2.43617	-4.11	1.44307
243914_at	0.961	0.0234289	2.43606	-4.11	1.39333
1553639_a_at	0.961	0.0234322	-2.43599	-4.11	-2.13731	PPARGC1B	PPARG coactivator 1 beta
1560994_x_at	0.961	0.0234724	2.4352	-4.11	2.0504	LOC400590	uncharacterized LOC400590
231293_at	0.961	0.0234765	2.43512	-4.11	1.4839
238317_x_at	0.961	0.0234774	2.4351	-4.11	1.4665
1558342_x_at	0.961	0.0234989	2.43468	-4.11	1.20511	DIXDC1	DIX domain containing 1
1563668_at	0.961	0.0235832	-2.43302	-4.11	-1.15273	MORN1	MORN repeat containing 1
1558519_at	0.961	0.0236243	2.43222	-4.11	1.86159	RPE	ribulose-5-phosphate-3-epimerase
1569331_at	0.961	0.0236322	2.43206	-4.11	1.7059	CNKSR3	CNKSR family member 3
227159_at	0.961	0.0236478	2.43175	-4.11	1.05635	GHDC	GH3 domain containing
227148_at	0.961	0.0236838	-2.43105	-4.11	-1.12718	PLEKHH2	pleckstrin homology, MyTH4 and FERM domain containing H2
237528_at	0.961	0.0237008	2.43072	-4.11	1.42156
234946_at	0.961	0.0237134	2.43047	-4.12	1.24678	ENTPD6	ectonucleoside triphosphate diphosphohydrolase 6 (putative)
243618_s_at	0.961	0.0237363	2.43003	-4.12	1.09037	ZNF827	zinc finger protein 827
244867_at	0.961	0.0237437	2.42988	-4.12	1.72723
236190_at	0.961	0.0237664	2.42944	-4.12	1.32728	LOC102723692	uncharacterized LOC102723692
1563185_at	0.961	0.0237847	-2.42908	-4.12	-1.50865	LOC102800447///LOC101930566	uncharacterized LOC102800447///uncharacterized LOC101930566
1568612_at	0.961	0.0238023	2.42874	-4.12	1.21414	GABRG2	gamma-aminobutyric acid type A receptor gamma2 subunit
217489_s_at	0.961	0.0238078	2.42863	-4.12	1.20978	IL6R	interleukin 6 receptor
238429_at	0.961	0.0238269	2.42826	-4.12	1.45184	TMEM71	transmembrane protein 71
1559326_at	0.961	0.0239286	2.42629	-4.12	1.25702	DIO3OS	DIO3 opposite strand/antisense RNA (head to head)
231193_s_at	0.961	0.0239339	2.42618	-4.12	1.30991	TAOK1	TAO kinase 1
1558821_s_at	0.961	0.0239449	-2.42597	-4.12	-1.23396	LOC102723694	uncharacterized LOC102723694
219585_at	0.961	0.023954	2.4258	-4.12	1.53132	CCDC28B	coiled-coil domain containing 28B
1562576_at	0.961	0.0239743	2.4254	-4.12	1.28098
210603_at	0.961	0.0239846	2.4252	-4.12	1.36091	NAA11	N(alpha)-acetyltransferase 11, NatA catalytic subunit
218929_at	0.961	0.0240136	-2.42464	-4.12	-1.03894	CDKN2AIP	CDKN2A interacting protein
223704_s_at	0.961	0.0240533	2.42388	-4.12	1.39026	DMRT2	doublesex and mab-3 related transcription factor 2
203687_at	0.961	0.0240673	2.42361	-4.12	1.23252	CX3CL1	C-X3-C motif chemokine ligand 1
210737_at	0.961	0.0240796	2.42337	-4.12	1.16065	TUB	tubby bipartite transcription factor
244595_at	0.961	0.0240873	2.42322	-4.12	1.49241
211901_s_at	0.961	0.0240976	2.42302	-4.12	1.17803	PDE4A	phosphodiesterase 4A
1555100_at	0.961	0.0241014	2.42295	-4.12	1.08062	APLF	aprataxin and PNKP like factor
217137_x_at	0.961	0.0241088	2.42281	-4.12	1.40034
1570145_at	0.961	0.0241239	2.42252	-4.12	1.39345	UCHL5	ubiquitin C-terminal hydrolase L5
1558645_at	0.961	0.0241523	2.42197	-4.12	1.51194	MIR133A1HG	MIR133A1 host gene
1563487_at	0.961	0.024175	-2.42154	-4.12	-1.51255
234967_at	0.961	0.0241933	-2.42119	-4.12	-1.97246	IL6ST	interleukin 6 signal transducer
244198_at	0.961	0.0242104	2.42086	-4.12	1.49957	RANBP17	RAN binding protein 17
243810_at	0.961	0.024231	2.42046	-4.12	1.567
239366_at	0.961	0.0242319	2.42045	-4.12	1.47587
217147_s_at	0.961	0.0242537	2.42003	-4.12	1.47262	TRAT1	T cell receptor associated transmembrane adaptor 1
1565644_at	0.961	0.0242646	2.41982	-4.12	1.34393	LOC143286	uncharacterized LOC143286
242259_at	0.961	0.0242834	2.41946	-4.12	1.70315	FAM187B	family with sequence similarity 187 member B
240341_at	0.961	0.0242871	2.41939	-4.12	1.78221
244368_x_at	0.961	0.0243279	2.41861	-4.12	1.06498	SUGT1	SGT1 homolog, MIS12 kinetochore complex assembly cochaperone
232120_at	0.961	0.0243552	-2.41809	-4.12	-1.31094
211372_s_at	0.961	0.0243688	-2.41783	-4.12	-1.57924	IL1R2	interleukin 1 receptor type 2
210075_at	0.961	0.0243864	-2.4175	-4.12	-1.27	2020-03-02	membrane associated ring-CH-type finger 2
230035_at	0.961	0.0243899	2.41743	-4.12	1.00552	BOC	BOC cell adhesion associated, oncogene regulated
230430_at	0.961	0.0243967	2.4173	-4.12	1.10589	ENTPD2	ectonucleoside triphosphate diphosphohydrolase 2
241103_at	0.961	0.0244236	2.41679	-4.12	1.75815	PPP4R3B	protein phosphatase 4 regulatory subunit 3B
239154_at	0.961	0.0244361	2.41655	-4.12	1.14877
219461_at	0.961	0.0245019	-2.41531	-4.12	-1.32112	PAK6	p21 (RAC1) activated kinase 6
209774_x_at	0.961	0.0245177	-2.41501	-4.12	-2.02266	CXCL2	C-X-C motif chemokine ligand 2
1564336_at	0.961	0.0245394	2.4146	-4.12	1.21009
203326_x_at	0.961	0.0245428	2.41453	-4.12	1.21677
217088_s_at	0.961	0.0245899	2.41364	-4.12	1.41367	NCR1	natural cytotoxicity triggering receptor 1
237622_at	0.961	0.0245903	2.41363	-4.12	1.47014	ACO1	aconitase 1
205040_at	0.961	0.0246047	2.41336	-4.12	1.20486	ORM1	orosomucoid 1
242963_at	0.961	0.024642	-2.41266	-4.12	-1.20579	SGMS2	sphingomyelin synthase 2
242727_at	0.961	0.02466	-2.41232	-4.12	-1.68963	ARL5B	ADP ribosylation factor like GTPase 5B
224113_at	0.961	0.0247126	2.41133	-4.12	1.10977	CARD14	caspase recruitment domain family member 14
242175_at	0.961	0.0247778	2.41011	-4.12	1.37069
1557203_at	0.961	0.0247874	2.40993	-4.12	1.11563	PABPC1L2B///PABPC1L2A	poly(A) binding protein cytoplasmic 1 like 2B///poly(A) binding protein cytoplasmic 1 like 2A
216681_at	0.961	0.0247931	2.40982	-4.12	1.51848
228071_at	0.961	0.024794	2.4098	-4.12	1.86797	GIMAP7	GTPase, IMAP family member 7
205113_at	0.961	0.0247942	-2.4098	-4.12	-1.32072	NEFM	neurofilament, medium polypeptide
204760_s_at	0.961	0.0248355	-2.40903	-4.12	-1.73881	NR1D1///THRA	nuclear receptor subfamily 1 group D member 1///thyroid hormone receptor, alpha
219251_s_at	0.961	0.0248418	2.40891	-4.12	1.01067	WDR60	WD repeat domain 60
1562642_at	0.961	0.0248424	2.4089	-4.12	1.05951
244813_at	0.961	0.0248474	2.4088	-4.12	1.30459
203238_s_at	0.961	0.0249083	2.40766	-4.12	1.45681	NOTCH3	notch 3
1562604_at	0.961	0.0249233	-2.40739	-4.12	-1.28764	LOC101927043	uncharacterized LOC101927043
1560787_at	0.961	0.0249378	-2.40711	-4.12	-1.44042	LOC101929143	uncharacterized LOC101929143
231414_at	0.961	0.0249397	2.40708	-4.12	1.17065
205331_s_at	0.961	0.0249454	2.40697	-4.12	1.00605	REEP2	receptor accessory protein 2
1558900_at	0.961	0.02498	2.40633	-4.13	1.56422
1560240_at	0.961	0.0249846	-2.40624	-4.13	-1.54272	LINC01293	long intergenic non-protein coding RNA 1293
240595_at	0.961	0.0250103	2.40576	-4.13	1.31076
240378_at	0.961	0.0250134	2.40571	-4.13	1.55408
241871_at	0.961	0.0250365	2.40528	-4.13	1.48152	CAMK4	calcium/calmodulin dependent protein kinase IV
1559982_s_at	0.961	0.0251117	2.40388	-4.13	1.28948	AKR1E2	aldo-keto reductase family 1 member E2
227747_at	0.961	0.0251204	2.40372	-4.13	1.21747	MPZL3	myelin protein zero like 3
207130_at	0.961	0.0251347	2.40346	-4.13	1.26394	ZMYND8	zinc finger MYND-type containing 8
213202_at	0.961	0.0251429	2.40331	-4.13	1.47631	SETD1A	SET domain containing 1A
224220_x_at	0.961	0.025162	-2.40295	-4.13	-1.05512	TRPC4	transient receptor potential cation channel subfamily C member 4
214809_at	0.961	0.0252189	2.4019	-4.13	1.47388	LOC100294145	uncharacterized LOC100294145
1569975_at	0.961	0.0252206	2.40187	-4.13	1.54538
243862_at	0.961	0.0252344	2.40162	-4.13	1.73703	RASEF	RAS and EF-hand domain containing
215133_s_at	0.961	0.0253366	-2.39974	-4.13	-1.27894	LOC102725213///LOC100507387///FAM153A///FAM153B	uncharacterized LOC102725213///uncharacterized LOC100507387///family with sequence similarity 153 member A///family with sequence similarity 153 member B
242198_at	0.961	0.0253382	2.39971	-4.13	1.72157
240414_at	0.961	0.025372	2.39909	-4.13	1.17899
239723_at	0.961	0.0254048	2.39848	-4.13	1.43899
232388_at	0.961	0.0254156	2.39829	-4.13	1.3726	CNTNAP4	contactin associated protein like 4
1569958_at	0.961	0.0254269	2.39808	-4.13	1.46263	DEPDC1-AS1	DEPDC1 antisense RNA 1
244064_at	0.961	0.0254347	2.39794	-4.13	1.21756
1552975_x_at	0.961	0.0254454	2.39774	-4.13	1.53458
236865_at	0.961	0.0254538	-2.39759	-4.13	-1.31281
1557418_at	0.961	0.0254603	2.39747	-4.13	1.34118	ACSL4	acyl-CoA synthetase long-chain family member 4
243399_at	0.961	0.0254825	2.39706	-4.13	1.36503
224194_at	0.961	0.0254844	2.39703	-4.13	1.32499	FCRL2	Fc receptor like 2
234679_at	0.961	0.0254852	2.39701	-4.13	1.38529	KRTAP9-3	keratin associated protein 9-3
1556394_a_at	0.961	0.0255117	2.39653	-4.13	1.62195
236924_at	0.961	0.0255118	2.39653	-4.13	1.491
213716_s_at	0.961	0.0255316	-2.39617	-4.13	-1.08893	SECTM1	secreted and transmembrane 1
240089_at	0.961	0.0255476	2.39588	-4.13	1.21986
219159_s_at	0.961	0.0255683	2.3955	-4.13	1.40698	SLAMF7	SLAM family member 7
223122_s_at	0.961	0.0255955	-2.395	-4.13	-1.89145	SFRP2	secreted frizzled related protein 2
214301_s_at	0.961	0.0256078	2.39478	-4.13	1.1616	DPYSL4	dihydropyrimidinase like 4
1554840_at	0.961	0.0256134	2.39468	-4.13	1.33079	LOC280665	anti-CNG alpha 1 cation channel translation product-like
1568851_at	0.961	0.0256142	2.39466	-4.13	1.48812	LINC01352	long intergenic non-protein coding RNA 1352
227030_at	0.961	0.0256195	2.39457	-4.13	1.1413	IKZF3	IKAROS family zinc finger 3
204440_at	0.961	0.0256197	-2.39456	-4.13	-1.45901	CD83	CD83 molecule
219912_s_at	0.961	0.0256684	2.39368	-4.13	1.19837	ENPP3	ectonucleotide pyrophosphatase/phosphodiesterase 3
242320_at	0.961	0.0257017	-2.39308	-4.13	-1.47672
234564_at	0.961	0.0257074	2.39297	-4.13	1.21795
220066_at	0.961	0.0257451	-2.39229	-4.13	-1.26945	NOD2	nucleotide binding oligomerization domain containing 2
215719_x_at	0.961	0.0257715	-2.39181	-4.13	-1.06381	FAS	Fas cell surface death receptor
230662_at	0.961	0.0257882	-2.39151	-4.13	-1.10642	RNF187	ring finger protein 187
1568625_at	0.961	0.0257934	2.39142	-4.13	1.41303	SVOP	SV2 related protein
236037_at	0.961	0.0258288	-2.39078	-4.13	-1.65119	ARFGEF3	ARFGEF family member 3
240536_at	0.961	0.0259077	-2.38935	-4.13	-1.41986
239858_at	0.961	0.0259118	-2.38928	-4.13	-1.40476
1569941_at	0.961	0.0259235	2.38907	-4.13	1.61973
203280_at	0.961	0.0259277	2.38899	-4.13	1.38859	SAFB2	scaffold attachment factor B2
211186_s_at	0.961	0.0259334	2.38889	-4.13	1.062	AAK1	AP2 associated kinase 1
227638_at	0.961	0.0259559	-2.38849	-4.13	-1.01125	EPG5	ectopic P-granules autophagy protein 5 homolog
1555731_a_at	0.961	0.0260251	-2.38725	-4.13	-1.00432	AP1S3	adaptor related protein complex 1 sigma 3 subunit
201452_at	0.961	0.0260321	2.38712	-4.13	1.27524	RHEB	Ras homolog enriched in brain
234652_at	0.961	0.0260337	2.38709	-4.13	1.17164	LOC105376944	uncharacterized LOC105376944
237256_at	0.961	0.0260414	2.38695	-4.13	1.29679	FBXL12	F-box and leucine rich repeat protein 12
205772_s_at	0.961	0.0260655	2.38652	-4.13	1.4624	AKAP7	A-kinase anchoring protein 7
1562696_at	0.961	0.0260958	-2.38598	-4.13	-1.5939	FAM155A-IT1	FAM155A intronic transcript 1
1569638_at	0.961	0.0261049	-2.38582	-4.13	-1.49558	SOX5	SRY-box 5
242873_at	0.961	0.0261438	2.38512	-4.13	1.51093	LOC101928100	uncharacterized LOC101928100
206757_at	0.961	0.0261571	2.38489	-4.13	1.47342	PDE5A	phosphodiesterase 5A
238257_at	0.961	0.0261792	-2.38449	-4.13	-1.17554
206920_s_at	0.961	0.026211	2.38393	-4.13	1.57068	GLE1	GLE1, RNA export mediator
207850_at	0.961	0.0262597	-2.38306	-4.13	-1.67067	CXCL3	C-X-C motif chemokine ligand 3
233516_s_at	0.961	0.0262638	2.38299	-4.13	1.42491	SPAG17	sperm associated antigen 17
236726_at	0.961	0.02627	2.38288	-4.13	1.136	RGS6	regulator of G-protein signaling 6
229641_at	0.961	0.0262729	-2.38283	-4.13	-1.25931	CCBE1	collagen and calcium binding EGF domains 1
229712_at	0.961	0.0262745	-2.3828	-4.13	-1.07303	SNAPC3	small nuclear RNA activating complex polypeptide 3
233680_at	0.961	0.0262769	-2.38276	-4.13	-1.40648	LOC101929454	uncharacterized LOC101929454
205488_at	0.961	0.0263029	2.38229	-4.14	1.5891	GZMA	granzyme A
242983_at	0.961	0.0263341	2.38174	-4.14	1.47165
240760_at	0.961	0.0263513	2.38143	-4.14	1.31154	CDRT15	CMT1A duplicated region transcript 15
222196_at	0.961	0.0264107	2.38038	-4.14	1.43389	LOC389906	zinc finger protein 839 pseudogene
219228_at	0.961	0.0264138	-2.38033	-4.14	-1.011	ZNF331	zinc finger protein 331
215968_at	0.961	0.0264796	2.37917	-4.14	1.60076
242715_at	0.961	0.0264961	2.37888	-4.14	1.59155	ZNF536	zinc finger protein 536
216924_s_at	0.961	0.0265022	-2.37877	-4.14	-1.08721	DRD2	dopamine receptor D2
241438_at	0.961	0.0265111	2.37861	-4.14	1.69828
231091_x_at	0.961	0.0265316	-2.37825	-4.14	-1.334
1556887_at	0.961	0.0265318	2.37825	-4.14	1.23553	NPHP3-AS1	NPHP3 antisense RNA 1
1560797_s_at	0.961	0.0265456	2.37801	-4.14	1.29436	LOC101927830///TMLHE-AS1	uncharacterized LOC101927830///TMLHE antisense RNA 1
238454_at	0.961	0.0265456	2.37801	-4.14	1.36667	ZNF540	zinc finger protein 540
241666_at	0.961	0.0266567	-2.37606	-4.14	-1.1156	TCAIM	T-cell activation inhibitor, mitochondrial
216145_at	0.961	0.0266823	2.37561	-4.14	1.11309
1556265_at	0.961	0.0266857	2.37555	-4.14	1.27035	C20orf202	chromosome 20 open reading frame 202
226498_at	0.961	0.0267254	-2.37485	-4.14	-1.91658	FLT1	fms related tyrosine kinase 1
238163_at	0.961	0.0267539	-2.37435	-4.14	-1.31193	LOC102725343	uncharacterized LOC102725343
210721_s_at	0.961	0.0267688	2.37409	-4.14	1.49529	PAK5	p21 (RAC1) activated kinase 5
201720_s_at	0.961	0.0267754	2.37398	-4.14	1.69218	LAPTM5	lysosomal protein transmembrane 5
229864_at	0.961	0.0267767	2.37396	-4.14	1.5892	ELP6	elongator acetyltransferase complex subunit 6
210377_at	0.961	0.0267864	2.37379	-4.14	1.00157	ACSM3	acyl-CoA synthetase medium-chain family member 3
221755_at	0.961	0.0267982	2.37358	-4.14	1.6881	EHBP1L1	EH domain binding protein 1 like 1
213247_at	0.961	0.0267986	-2.37357	-4.14	-1.1659	SVEP1	sushi, von Willebrand factor type A, EGF and pentraxin domain containing 1
1570206_at	0.961	0.0268294	2.37304	-4.14	1.58365	LOC101928797	uncharacterized LOC101928797
237840_at	0.961	0.0268307	2.37302	-4.14	1.21393	LINC01118	long intergenic non-protein coding RNA 1118
1563128_at	0.961	0.0268399	2.37286	-4.14	1.38972
203797_at	0.961	0.0268828	-2.37211	-4.14	-1.18834	VSNL1	visinin like 1
1554488_at	0.961	0.0269352	2.3712	-4.14	1.30148	CEP70	centrosomal protein 70
1559110_at	0.961	0.0269935	2.37019	-4.14	1.06322
207526_s_at	0.961	0.0270018	-2.37004	-4.14	-1.00292	IL1RL1	interleukin 1 receptor like 1
1568916_at	0.961	0.0270022	2.37004	-4.14	1.25641	SPIRE2	spire type actin nucleation factor 2
232284_at	0.961	0.0270226	-2.36968	-4.14	-1.05606	PSMD6-AS2	PSMD6 antisense RNA 2
208584_at	0.961	0.0270307	2.36954	-4.14	1.2198	SNCG	synuclein gamma
217450_at	0.961	0.0270716	-2.36884	-4.14	-1.23634	AGFG2	ArfGAP with FG repeats 2
238137_at	0.961	0.0270733	2.36881	-4.14	1.4898
1554810_at	0.961	0.0270764	2.36875	-4.14	1.41167	PLA2G4C	phospholipase A2 group IVC
228098_s_at	0.961	0.0270907	-2.36851	-4.14	-1.65471	MYLIP	myosin regulatory light chain interacting protein
202916_s_at	0.961	0.0271621	2.36727	-4.14	1.00846	FAM20B	family with sequence similarity 20 member B
216500_at	0.961	0.0271657	2.36721	-4.14	1.08835
230288_at	0.961	0.0271685	2.36716	-4.14	1.20314	FGF14	fibroblast growth factor 14
1558324_a_at	0.961	0.0271838	2.3669	-4.14	1.10836	TMEM72	transmembrane protein 72
238704_at	0.961	0.0272235	2.36622	-4.14	1.17054
221920_s_at	0.961	0.0272568	-2.36565	-4.14	-1.20635	SLC25A37	solute carrier family 25 member 37
1555090_x_at	0.961	0.0273869	2.36342	-4.14	1.26572	TMEM182	transmembrane protein 182
221141_x_at	0.961	0.0274741	-2.36193	-4.14	-1.22707	EPN1	epsin 1
205286_at	0.961	0.0274869	-2.36171	-4.14	-1.00424	TFAP2C	transcription factor AP-2 gamma
238079_at	0.961	0.0274892	2.36167	-4.14	1.68339	TPM3	tropomyosin 3
1561340_at	0.961	0.0274997	2.36149	-4.14	1.60816	LOC105378311	uncharacterized LOC105378311
209212_s_at	0.961	0.0275009	-2.36147	-4.14	-1.24746	KLF5	Kruppel like factor 5
1554814_at	0.961	0.0275622	-2.36043	-4.14	-1.10139	UBE2O	ubiquitin conjugating enzyme E2 O
1557256_a_at	0.961	0.0275684	2.36032	-4.14	1.63416	GABRB1	gamma-aminobutyric acid type A receptor beta1 subunit
237344_at	0.961	0.0275922	-2.35992	-4.14	-1.94178	LINC01539	long intergenic non-protein coding RNA 1539
232154_at	0.961	0.0276013	-2.35977	-4.14	-1.12879	ADM5	adrenomedullin 5 (putative)
235879_at	0.961	0.0276404	2.3591	-4.14	1.70925
213167_s_at	0.961	0.027643	-2.35906	-4.14	-1.21417	SLC5A3	solute carrier family 5 member 3
1562553_at	0.961	0.0276555	2.35885	-4.14	1.46732
211421_s_at	0.961	0.0277252	-2.35767	-4.15	-1.34927	RET	ret proto-oncogene
1564401_at	0.961	0.0277461	-2.35731	-4.15	-1.28201	LOC400748	uncharacterized LOC400748
237946_at	0.961	0.0277505	2.35724	-4.15	1.44753
216190_x_at	0.961	0.0278391	2.35575	-4.15	1.23642	ITGB1	integrin subunit beta 1
1552582_at	0.961	0.0278737	2.35516	-4.15	1.11572	ABCC13	ATP binding cassette subfamily C member 13 (pseudogene)
1569781_at	0.961	0.0278742	-2.35515	-4.15	-1.56992	LOC285423	uncharacterized LOC285423
215934_at	0.961	0.0278812	2.35504	-4.15	1.31498
1564718_at	0.961	0.0279022	-2.35468	-4.15	-1.52282
242628_at	0.961	0.0279426	-2.35401	-4.15	-1.26166
240641_at	0.961	0.0279516	2.35386	-4.15	1.00994
210229_s_at	0.961	0.0279885	-2.35324	-4.15	-1.87924	CSF2	colony stimulating factor 2
1569551_at	0.961	0.0280155	2.35278	-4.15	1.34677
228473_at	0.961	0.0280895	-2.35155	-4.15	-1.30924	MSX1	msh homeobox 1
204818_at	0.961	0.0280911	2.35152	-4.15	1.52837	HSD17B2	hydroxysteroid 17-beta dehydrogenase 2
233577_at	0.961	0.0281499	2.35054	-4.15	1.38803
237841_at	0.961	0.0281716	2.35018	-4.15	1.494
1569693_at	0.961	0.0281915	2.34985	-4.15	1.65619	BTBD8	BTB domain containing 8
238299_at	0.961	0.0281959	2.34977	-4.15	1.37338
221245_s_at	0.961	0.0282189	-2.34939	-4.15	-1.04786	FZD5	frizzled class receptor 5
224272_at	0.961	0.0282404	-2.34903	-4.15	-1.44312	RACGAP1P	Rac GTPase activating protein 1 pseudogene
205381_at	0.961	0.028247	2.34892	-4.15	1.07954	LRRC17	leucine rich repeat containing 17
243756_at	0.961	0.0282473	2.34892	-4.15	1.40824
1561166_a_at	0.961	0.0282995	2.34805	-4.15	1.53478
1555708_a_at	0.961	0.0283014	2.34802	-4.15	1.02743	OFCC1	orofacial cleft 1 candidate 1
211280_s_at	0.961	0.0283128	2.34783	-4.15	1.59187	NRF1	nuclear respiratory factor 1
242694_at	0.961	0.0283156	-2.34779	-4.15	-1.12603	IQSEC3	IQ motif and Sec7 domain 3
1552765_x_at	0.961	0.0283604	-2.34704	-4.15	-1.33256	TMEM67	transmembrane protein 67
210498_at	0.961	0.0283879	2.34659	-4.15	1.56667	CLTC	clathrin heavy chain
206699_x_at	0.961	0.0283948	2.34647	-4.15	1.62549	NPAS1	neuronal PAS domain protein 1
1569948_at	0.961	0.0284063	2.34628	-4.15	1.51705
231807_at	0.961	0.0284771	-2.34512	-4.15	-1.13909	KIAA1217	KIAA1217
229005_at	0.961	0.0285984	-2.34312	-4.15	-1.18388	MCTP2	multiple C2 and transmembrane domain containing 2
239173_at	0.961	0.0286141	-2.34286	-4.15	-1.24379	PATJ	PATJ, crumbs cell polarity complex component
1568616_a_at	0.961	0.0286903	-2.34161	-4.15	-1.36908	C11orf96	chromosome 11 open reading frame 96
206925_at	0.961	0.0287303	-2.34096	-4.15	-1.3292	ST8SIA4	ST8 alpha-N-acetyl-neuraminide alpha-2,8-sialyltransferase 4
1553363_at	0.961	0.028753	2.34059	-4.15	1.66164	LINC01600	long intergenic non-protein coding RNA 1600
228067_at	0.961	0.0287721	-2.34027	-4.15	-1.31085	KIAA1211L	KIAA1211 like
209891_at	0.961	0.0287913	2.33996	-4.15	1.18554	SPC25	SPC25, NDC80 kinetochore complex component
212562_s_at	0.961	0.0288013	2.3398	-4.15	1.05183	CTSZ	cathepsin Z
239692_at	0.961	0.0288031	-2.33977	-4.15	-1.39321
1553869_at	0.961	0.0288337	2.33927	-4.15	1.46976	SESN3	sestrin 3
239831_at	0.961	0.028838	2.3392	-4.15	1.24418	TMEM106C	transmembrane protein 106C
214750_at	0.961	0.0288438	2.3391	-4.15	1.17845	PLAC4	placenta specific 4
233850_s_at	0.961	0.0288621	2.33881	-4.15	1.30478	EBF4	early B-cell factor 4
242432_at	0.961	0.0288707	2.33867	-4.15	1.35616	LRRC37A2	leucine rich repeat containing 37 member A2
241969_at	0.961	0.0288829	-2.33847	-4.15	-1.02435	ARID5B	AT-rich interaction domain 5B
237429_at	0.961	0.028892	2.33832	-4.15	1.4365
1554173_at	0.961	0.028923	-2.33782	-4.15	-1.13456	CD300LB	CD300 molecule like family member b
240913_at	0.961	0.0289472	2.33742	-4.15	1.28276	FGFR2	fibroblast growth factor receptor 2
232427_at	0.961	0.029005	2.33648	-4.15	1.53025	ZNF224	zinc finger protein 224
238873_at	0.961	0.0290437	2.33586	-4.15	1.60657	NPC1	NPC intracellular cholesterol transporter 1
40560_at	0.961	0.0290519	-2.33572	-4.15	-1.02933	TBX2	T-box 2
224081_at	0.961	0.029099	2.33496	-4.15	1.1869
1561322_at	0.961	0.0291054	2.33486	-4.15	1.54695	LOC101927450	uncharacterized LOC101927450
1566203_at	0.961	0.0291562	-2.33404	-4.15	-1.28668
1563032_at	0.961	0.0291799	2.33366	-4.16	2.03136
208469_s_at	0.961	0.0292156	2.33308	-4.16	1.04764	PPT2-EGFL8///EGFL8///PPT2	PPT2-EGFL8 readthrough (NMD candidate)///EGF like domain multiple 8///palmitoyl-protein thioesterase 2
234717_at	0.961	0.0292172	2.33306	-4.16	1.47056
1553151_at	0.961	0.0292628	2.33232	-4.16	1.49429	ATP6V0D2	ATPase H+ transporting V0 subunit d2
229777_at	0.961	0.0292788	-2.33206	-4.16	-1.63476	CLRN3	clarin 3
237544_at	0.961	0.0293436	2.33102	-4.16	1.22083
217391_x_at	0.961	0.0293567	2.33081	-4.16	1.02676
233078_at	0.961	0.0293961	2.33018	-4.16	1.08744	API5	apoptosis inhibitor 5
237177_at	0.961	0.0294215	2.32977	-4.16	1.5061	CNTN4	contactin 4
238603_at	0.961	0.029427	2.32969	-4.16	1.07894	MIR9-3HG	MIR9-3 host gene
242893_at	0.961	0.0294345	2.32957	-4.16	1.26328	LURAP1L-AS1	LURAP1L antisense RNA 1
233207_at	0.961	0.0294397	2.32948	-4.16	1.14373	DISC1	disrupted in schizophrenia 1
238556_at	0.961	0.029538	2.32792	-4.16	1.45759	CAMK2G	calcium/calmodulin dependent protein kinase II gamma
1564627_at	0.961	0.0295397	2.32789	-4.16	1.10006	DNAJC13	DnaJ heat shock protein family (Hsp40) member C13
220080_at	0.961	0.0295399	2.32788	-4.16	1.18076	FBXL8	F-box and leucine rich repeat protein 8
205659_at	0.961	0.0295462	-2.32778	-4.16	-1.0929	HDAC9	histone deacetylase 9
220301_at	0.961	0.0295807	-2.32723	-4.16	-1.55355	CCDC102B	coiled-coil domain containing 102B
244006_at	0.961	0.0295842	-2.32718	-4.16	-1.54846	POU2F1	POU class 2 homeobox 1
1568406_at	0.961	0.0296035	2.32687	-4.16	1.396
231294_at	0.961	0.0296211	2.32659	-4.16	1.7755
210928_at	0.961	0.0296898	2.3255	-4.16	1.61899
215064_at	0.961	0.0296981	-2.32537	-4.16	-1.65353	SC5D	sterol-C5-desaturase
210629_x_at	0.961	0.0297245	-2.32495	-4.16	-1.35567	LST1	leukocyte specific transcript 1
238074_at	0.961	0.029822	-2.32341	-4.16	-1.26908	WDR27	WD repeat domain 27
220936_s_at	0.961	0.0298499	-2.32297	-4.16	-1.30911	H2AFJ	H2A histone family member J
207351_s_at	0.961	0.0298685	2.32267	-4.16	1.19048	SH2D2A	SH2 domain containing 2A
236430_at	0.961	0.0299114	-2.32199	-4.16	-1.32101	TMED6	transmembrane p24 trafficking protein 6
237016_at	0.961	0.0299673	-2.32112	-4.16	-1.60242	TMEM217	transmembrane protein 217
231963_at	0.961	0.0299755	-2.32099	-4.16	-1.47696	ANKRD33B	ankyrin repeat domain 33B
241637_at	0.961	0.0300242	2.32022	-4.16	1.3727
241477_at	0.961	0.0300399	-2.31997	-4.16	-1.25511	MIR631///NEIL1	microRNA 631///nei like DNA glycosylase 1
216587_s_at	0.961	0.0300524	-2.31978	-4.16	-1.07858	MIR4683///FZD8	microRNA 4683///frizzled class receptor 8
213566_at	0.961	0.0300726	2.31946	-4.16	2.02914	RNASE6	ribonuclease A family member k6
214015_at	0.961	0.0300743	-2.31943	-4.16	-1.11442	SOCS7	suppressor of cytokine signaling 7
1566459_at	0.961	0.0300921	2.31915	-4.16	1.19926
214090_at	0.961	0.0301622	2.31806	-4.16	1.67344	PAWR	pro-apoptotic WT1 regulator
237511_at	0.961	0.0301691	2.31795	-4.16	1.01472
231455_at	0.961	0.0301865	2.31768	-4.16	1.68532	LINC00487	long intergenic non-protein coding RNA 487
239294_at	0.961	0.030187	2.31767	-4.16	1.30931	PIK3CG	phosphatidylinositol-4,5-bisphosphate 3-kinase catalytic subunit gamma
233851_s_at	0.961	0.0302508	2.31667	-4.16	1.39339	TOR3A	torsin family 3 member A
219736_at	0.961	0.0302809	-2.3162	-4.16	-1.34746	TRIM36	tripartite motif containing 36
205804_s_at	0.961	0.0303063	2.31581	-4.16	1.47375	TRAF3IP3	TRAF3 interacting protein 3
207844_at	0.961	0.0303999	2.31435	-4.16	1.01415	IL13	interleukin 13
240398_at	0.961	0.0305366	2.31224	-4.16	1.00043	ITPKB-IT1	ITPKB intronic transcript 1
1568845_at	0.961	0.0305472	2.31207	-4.16	1.22291
241297_at	0.961	0.0305499	-2.31203	-4.16	-1.47115
216057_at	0.961	0.0305693	2.31173	-4.16	1.20349	RAB3GAP2	RAB3 GTPase activating non-catalytic protein subunit 2
91580_at	0.961	0.0306005	-2.31125	-4.16	-1.09173	LRTM1	leucine rich repeats and transmembrane domains 1
232414_at	0.961	0.0306394	2.31065	-4.16	1.89181	HEATR1	HEAT repeat containing 1
239016_at	0.961	0.0306397	2.31064	-4.16	1.23543
1555882_at	0.961	0.0306413	2.31062	-4.16	1.66241	SPIN3	spindlin family member 3
235137_at	0.961	0.030648	-2.31052	-4.16	-1.40725	PCBP1-AS1	PCBP1 antisense RNA 1
235272_at	0.961	0.0306611	-2.31031	-4.16	-1.539	SBSN	suprabasin
1559285_at	0.961	0.030669	2.31019	-4.16	1.21266
210994_x_at	0.961	0.0306731	-2.31013	-4.16	-1.22857	TRIM23	tripartite motif containing 23
216065_at	0.961	0.0306981	-2.30974	-4.16	-1.4257	B3GALT4	beta-1,3-galactosyltransferase 4
242894_at	0.961	0.0307846	2.30841	-4.17	1.35146
221085_at	0.961	0.0308187	2.30789	-4.17	1.20918	TNFSF15	tumor necrosis factor superfamily member 15
1559427_at	0.961	0.0308292	2.30773	-4.17	1.35953	MCF2L	MCF.2 cell line derived transforming sequence like
241658_at	0.961	0.0308424	-2.30753	-4.17	-1.0712	ARIH1	ariadne RBR E3 ubiquitin protein ligase 1
204724_s_at	0.961	0.0308665	2.30716	-4.17	1.60911	COL9A3	collagen type IX alpha 3 chain
205360_at	0.961	0.0308849	2.30688	-4.17	1.2062	PFDN4	prefoldin subunit 4
220148_at	0.961	0.0308858	-2.30686	-4.17	-1.31963	ALDH8A1	aldehyde dehydrogenase 8 family member A1
1562189_at	0.961	0.0309339	2.30613	-4.17	1.37465
1567358_at	0.961	0.0309523	2.30585	-4.17	1.59736	NAV2	neuron navigator 2
214564_s_at	0.961	0.0310068	2.30501	-4.17	1.17927	PCDHGC3	protocadherin gamma subfamily C, 3
242465_at	0.961	0.0310245	2.30474	-4.17	1.27461	GAPLINC	gastric adenocarcinoma associated, positive CD44 regulator, long intergenic non-coding RNA
239518_at	0.961	0.0310925	2.30371	-4.17	1.16188	LOC102725022	uncharacterized LOC102725022
215163_at	0.961	0.0310971	2.30364	-4.17	1.38403
215212_at	0.961	0.0310982	-2.30362	-4.17	-1.51602
232133_at	0.961	0.0311281	2.30317	-4.17	1.04624	ADAMTS10	ADAM metallopeptidase with thrombospondin type 1 motif 10
208583_x_at	0.961	0.0311298	-2.30314	-4.17	-1.07374	HIST1H2AJ	histone cluster 1, H2aj
1555139_a_at	0.961	0.0311396	-2.30299	-4.17	-1.07829	OTUD7B	OTU deubiquitinase 7B
221249_s_at	0.961	0.031141	-2.30297	-4.17	-1.04423	FAM117A	family with sequence similarity 117 member A
210620_s_at	0.961	0.0311491	-2.30285	-4.17	-1.13245	GTF3C2	general transcription factor IIIC subunit 2
1569568_at	0.961	0.0311676	2.30257	-4.17	1.60339
1566964_at	0.961	0.0312055	2.30199	-4.17	1.34216
206115_at	0.961	0.0312086	-2.30195	-4.17	-1.77877	EGR3	early growth response 3
204116_at	0.961	0.0312102	2.30192	-4.17	1.15322	IL2RG	interleukin 2 receptor subunit gamma
216493_s_at	0.961	0.031228	2.30165	-4.17	1.82195	IGF2BP3	insulin like growth factor 2 mRNA binding protein 3
1553601_a_at	0.961	0.0312334	-2.30157	-4.17	-1.14978	TMIE	transmembrane inner ear
1558806_at	0.961	0.0312511	2.3013	-4.17	1.42138
1560063_a_at	0.961	0.0312722	2.30098	-4.17	1.30735
1566215_at	0.961	0.031321	2.30025	-4.17	1.16096
216709_at	0.961	0.031343	2.29991	-4.17	1.23313
209346_s_at	0.961	0.0313711	-2.29949	-4.17	-1.11339	PI4K2A	phosphatidylinositol 4-kinase type 2 alpha
1557609_s_at	0.961	0.0314035	-2.299	-4.17	-1.2119	TBC1D12	TBC1 domain family member 12
229112_at	0.961	0.0314086	2.29892	-4.17	1.03171	SIRT5	sirtuin 5
206258_at	0.961	0.0315826	2.29631	-4.17	1.23958	ST8SIA5	ST8 alpha-N-acetyl-neuraminide alpha-2,8-sialyltransferase 5
241124_at	0.961	0.0315878	2.29623	-4.17	1.48752	LOC101928702	uncharacterized LOC101928702
214804_at	0.961	0.0315958	2.29611	-4.17	1.58795	CENPI	centromere protein I
237244_at	0.961	0.031623	2.2957	-4.17	1.54734	C10orf71-AS1	C10orf71 antisense RNA 1
242791_at	0.961	0.0316368	2.2955	-4.17	1.23969	FBXO3	F-box protein 3
235468_at	0.961	0.0316451	2.29537	-4.17	1.22406	RBFOX3	RNA binding protein, fox-1 homolog 3
242912_at	0.961	0.031682	2.29482	-4.17	1.49613	POTEM	POTE ankyrin domain family member M
1555981_at	0.961	0.0317091	2.29441	-4.17	1.23846	ASB16-AS1	ASB16 antisense RNA 1
240847_at	0.961	0.031711	2.29439	-4.17	1.28557
228260_at	0.961	0.0317692	-2.29352	-4.17	-1.06546	ELAVL2	ELAV like neuron-specific RNA binding protein 2
221369_at	0.961	0.0317849	2.29328	-4.17	1.22573	MTNR1A	melatonin receptor 1A
226597_at	0.961	0.0317973	2.2931	-4.17	1.04803	REEP6	receptor accessory protein 6
227806_at	0.961	0.0318088	-2.29293	-4.17	-1.10304	C16orf74	chromosome 16 open reading frame 74
213732_at	0.961	0.0318669	2.29206	-4.17	1.19325	TCF3	transcription factor 3
243055_at	0.961	0.0319013	2.29155	-4.17	1.0909
231027_at	0.961	0.0319152	-2.29134	-4.17	-1.09563
236597_at	0.961	0.0319359	2.29104	-4.17	1.30708	UGT3A1	UDP glycosyltransferase family 3 member A1
215308_at	0.961	0.0319439	-2.29092	-4.17	-1.10653	XRCC6	X-ray repair cross complementing 6
244809_at	0.961	0.0320357	2.28956	-4.17	1.33288
1559348_a_at	0.961	0.0320693	2.28906	-4.17	1.38657
226407_at	0.961	0.0321193	2.28832	-4.17	1.64173	TPT1-AS1	TPT1 antisense RNA 1
237316_at	0.961	0.0321517	-2.28784	-4.17	-1.16282	ANKDD1A	ankyrin repeat and death domain containing 1A
241970_at	0.961	0.0321613	2.2877	-4.17	1.46897
244787_at	0.961	0.0322192	-2.28685	-4.17	-1.34464
235042_at	0.961	0.0322747	-2.28603	-4.17	-2.10779	XIRP1	xin actin binding repeat containing 1
220002_at	0.961	0.0322787	2.28597	-4.17	1.13385	KIF26B	kinesin family member 26B
208334_at	0.961	0.0322926	2.28577	-4.17	1.66958	NDST4	N-deacetylase and N-sulfotransferase 4
214945_at	0.961	0.0323037	-2.28561	-4.17	-1.62355	LOC101930363///LOC101928349///LOC100507387///FAM153C///FAM153A///FAM153B	uncharacterized LOC101930363///uncharacterized LOC101928349///uncharacterized LOC100507387///family with sequence similarity 153, member C///family with sequence similarity 153 member A///family with sequence similarity 153 member B
214724_at	0.961	0.032307	2.28556	-4.17	1.11239	DIXDC1	DIX domain containing 1
223942_x_at	0.961	0.0323074	2.28555	-4.17	1.33278	CHST5	carbohydrate sulfotransferase 5
238209_at	0.961	0.0323543	2.28487	-4.18	1.0608
210404_x_at	0.961	0.0323561	2.28484	-4.18	1.09272	CAMK2B	calcium/calmodulin dependent protein kinase II beta
1566222_at	0.961	0.03236	2.28478	-4.18	1.5191
1557151_at	0.961	0.0324211	2.28389	-4.18	1.38335
234837_at	0.961	0.0324253	2.28382	-4.18	1.53755
219612_s_at	0.961	0.0324418	2.28358	-4.18	1.35298	FGG	fibrinogen gamma chain
214385_s_at	0.961	0.0324801	2.28302	-4.18	1.41714	MUC5AC	mucin 5AC, oligomeric mucus/gel-forming
41397_at	0.961	0.0325081	2.28261	-4.18	1.36308	ZNF821	zinc finger protein 821
1563115_at	0.961	0.0325185	2.28246	-4.18	1.5274
237796_at	0.961	0.0325337	-2.28224	-4.18	-1.4215
1561262_at	0.961	0.0325339	-2.28224	-4.18	-2.19403	LINC01516	long intergenic non-protein coding RNA 1516
237570_x_at	0.961	0.0325713	2.28169	-4.18	1.40096
238745_at	0.961	0.0328079	-2.27826	-4.18	-1.29775
241149_at	0.961	0.0328096	2.27823	-4.18	1.05498
213868_s_at	0.961	0.0328432	2.27774	-4.18	1.23208	DHRS7	dehydrogenase/reductase 7
243776_at	0.961	0.0328932	2.27702	-4.18	1.50467	LOC105374428	uncharacterized LOC105374428
216650_at	0.961	0.0329216	-2.27661	-4.18	-1.49739
214372_x_at	0.961	0.0329217	2.27661	-4.18	1.15624	ERN2	endoplasmic reticulum to nucleus signaling 2
1556383_at	0.961	0.0329952	-2.27555	-4.18	-1.40141
201502_s_at	0.961	0.0330035	-2.27543	-4.18	-1.35362	NFKBIA	NFKB inhibitor alpha
1570123_at	0.961	0.0330049	2.27541	-4.18	1.26676
230474_at	0.961	0.0330105	2.27533	-4.18	1.46472	UBIAD1	UbiA prenyltransferase domain containing 1
215276_at	0.961	0.0330174	2.27523	-4.18	1.28872	WFDC8	WAP four-disulfide core domain 8
243419_at	0.961	0.0330812	2.27431	-4.18	1.21068	LOC654342	lymphocyte-specific protein 1 pseudogene
232521_at	0.961	0.0331016	2.27402	-4.18	1.69076	PCSK7	proprotein convertase subtilisin/kexin type 7
1557632_at	0.961	0.0331499	2.27333	-4.18	1.71469
230458_at	0.961	0.0332762	-2.27152	-4.18	-1.2854	SLC45A1	solute carrier family 45 member 1
1559543_at	0.961	0.0332775	2.2715	-4.18	1.40964	LINC00441	long intergenic non-protein coding RNA 441
206588_at	0.961	0.0333332	-2.2707	-4.18	-1.45775	DAZL	deleted in azoospermia like
1562067_at	0.961	0.033356	2.27038	-4.18	1.19759
1559188_x_at	0.961	0.0333593	2.27033	-4.18	1.26711	PRKXP1	protein kinase, X-linked, pseudogene 1
203691_at	0.961	0.0333838	-2.26998	-4.18	-1.39354	PI3	peptidase inhibitor 3
213435_at	0.961	0.0333854	2.26996	-4.18	1.35518	SATB2	SATB homeobox 2
235356_at	0.961	0.0333893	2.2699	-4.18	1.16811	NHLRC2	NHL repeat containing 2
215709_at	0.961	0.0333895	2.2699	-4.18	1.47316	PRIM2B///PRIM2	primase (DNA) subunit 2 pseudogene///primase (DNA) subunit 2
1553114_a_at	0.961	0.033411	-2.26959	-4.18	-1.26069	PTK6	protein tyrosine kinase 6
242758_x_at	0.961	0.0334752	2.26868	-4.18	2.07267	KDM3A	lysine demethylase 3A
1552608_at	0.961	0.0334801	-2.26861	-4.18	-1.43138	WFDC11	WAP four-disulfide core domain 11
236387_at	0.961	0.0334807	2.2686	-4.18	1.19034	CCNT2-AS1	CCNT2 antisense RNA 1
1561170_at	0.961	0.0334876	2.2685	-4.18	1.36568	GOLGA6L6	golgin A6 family-like 6
242306_at	0.961	0.0335032	2.26828	-4.18	1.06818
239823_at	0.961	0.0335086	-2.26821	-4.18	-1.0433	LOC101927841	uncharacterized LOC101927841
242112_at	0.961	0.0335153	2.26811	-4.18	1.14475	LSM11	LSM11, U7 small nuclear RNA associated
206351_s_at	0.961	0.0335492	2.26763	-4.18	1.21315	PEX10	peroxisomal biogenesis factor 10
220915_s_at	0.961	0.0335746	2.26727	-4.18	1.21653
236902_at	0.961	0.033634	2.26643	-4.18	1.30171	LINC00643	long intergenic non-protein coding RNA 643
208396_s_at	0.961	0.0336545	-2.26614	-4.18	-1.47206	PDE1A	phosphodiesterase 1A
216186_at	0.961	0.0337258	2.26513	-4.18	1.40063
1562313_at	0.961	0.0337746	2.26444	-4.18	1.15071	BCORP1	BCL6 corepressor pseudogene 1
230931_at	0.961	0.0338115	2.26392	-4.18	1.25283	PLG	plasminogen
1557862_at	0.961	0.0338422	2.26349	-4.18	1.37604	LOC654841	uncharacterized LOC654841
1553633_s_at	0.961	0.0338494	-2.26339	-4.18	-1.26261	LOC101929373///SLC9B1	uncharacterized LOC101929373///solute carrier family 9 member B1
208098_at	0.961	0.0339375	2.26215	-4.18	1.61522	OR12D3///OR5V1	olfactory receptor family 12 subfamily D member 3///olfactory receptor family 5 subfamily V member 1
223868_s_at	0.961	0.0339468	2.26202	-4.18	1.22529	WWOX	WW domain containing oxidoreductase
232714_at	0.961	0.0339513	2.26196	-4.18	1.50467	TP53TG5	TP53 target 5
218416_s_at	0.961	0.0339811	2.26154	-4.18	1.41746	SLC48A1	solute carrier family 48 member 1
202669_s_at	0.961	0.0340615	-2.26041	-4.19	-1.09474	EFNB2	ephrin B2
1552954_at	0.961	0.0340908	2.26	-4.19	1.61836	C5orf17	chromosome 5 open reading frame 17
241860_at	0.961	0.034105	-2.2598	-4.19	-1.2387
216066_at	0.961	0.0341061	-2.25979	-4.19	-1.54998	ABCA1	ATP binding cassette subfamily A member 1
1560959_a_at	0.961	0.0341202	-2.25959	-4.19	-1.39704
1555799_at	0.961	0.0341761	2.25881	-4.19	1.4031	FCRL5	Fc receptor like 5
1570479_at	0.961	0.0341968	2.25852	-4.19	1.1616	ART1	ADP-ribosyltransferase 1
234907_x_at	0.961	0.0342079	-2.25837	-4.19	-1.14674	POLB	DNA polymerase beta
229127_at	0.961	0.0342083	2.25836	-4.19	1.17271	JAM2	junctional adhesion molecule 2
214296_x_at	0.961	0.0342157	-2.25826	-4.19	-1.04312	IZUMO4	IZUMO family member 4
217500_at	0.961	0.0343015	2.25706	-4.19	1.18754	TIAL1	TIA1 cytotoxic granule-associated RNA binding protein-like 1
212374_at	0.961	0.0343493	-2.2564	-4.19	-1.06136	FEM1B	fem-1 homolog B
230455_at	0.961	0.0343794	2.25598	-4.19	1.00425	PPP1R9B	protein phosphatase 1 regulatory subunit 9B
232029_at	0.961	0.0344031	2.25565	-4.19	1.19115	ZNF451	zinc finger protein 451
223774_at	0.961	0.0344139	-2.25551	-4.19	-1.46874	SNORA16A///SNORA61///SNORA44///SNHG12	small nucleolar RNA, H/ACA box 16A///small nucleolar RNA, H/ACA box 61///small nucleolar RNA, H/ACA box 44///small nucleolar RNA host gene 12
240868_at	0.961	0.0344264	2.25533	-4.19	1.05671	LOC100129406	uncharacterized LOC100129406
233416_at	0.961	0.0344482	2.25503	-4.19	1.66009	GNG8	G protein subunit gamma 8
231257_at	0.961	0.0344576	-2.2549	-4.19	-1.23147	TCERG1L	transcription elongation regulator 1 like
212094_at	0.961	0.0344805	-2.25458	-4.19	-1.17995	PEG10	paternally expressed 10
210560_at	0.961	0.0345051	2.25424	-4.19	1.07335	GBX2	gastrulation brain homeobox 2
217412_at	0.961	0.0345423	2.25373	-4.19	1.28886
1552939_at	0.961	0.0345871	2.25311	-4.19	1.57726	ANGPT1	angiopoietin 1
230468_s_at	0.961	0.0346278	-2.25255	-4.19	-1.31157	C1orf56	chromosome 1 open reading frame 56
230771_at	0.961	0.0346295	-2.25252	-4.19	-1.13799	NKAIN4	Na+/K+ transporting ATPase interacting 4
1561059_a_at	0.961	0.0346387	2.2524	-4.19	1.58185	LINC00691	long intergenic non-protein coding RNA 691
231696_x_at	0.961	0.0346665	2.25202	-4.19	1.16803	TMEM50B	transmembrane protein 50B
217247_at	0.961	0.0346687	-2.25198	-4.19	-1.1079
1557262_at	0.961	0.0347043	2.2515	-4.19	1.11167	LOC102724814	uncharacterized LOC102724814
241819_at	0.961	0.0347082	2.25144	-4.19	1.39564	TNFSF8	tumor necrosis factor superfamily member 8
220906_at	0.961	0.0347374	2.25104	-4.19	1.34534
208501_at	0.961	0.0347411	2.25099	-4.19	1.19563	GFI1B	growth factor independent 1B transcriptional repressor
1560581_at	0.961	0.0347431	2.25096	-4.19	1.55483
243880_at	0.961	0.0347496	-2.25087	-4.19	-1.44558	GOSR2	golgi SNAP receptor complex member 2
1564491_at	0.961	0.0347721	2.25056	-4.19	1.14181	SPANXA2-OT1	SPANXA2 overlapping transcript 1
216275_at	0.961	0.0348251	2.24984	-4.19	1.32748	BUB1	BUB1 mitotic checkpoint serine/threonine kinase
231010_at	0.961	0.0348556	2.24942	-4.19	1.22849	AP1AR	adaptor related protein complex 1 associated regulatory protein
1553494_at	0.961	0.0348662	-2.24927	-4.19	-1.81456	TDH	L-threonine dehydrogenase (pseudogene)
219274_at	0.961	0.0348919	2.24892	-4.19	1.94424	TSPAN12	tetraspanin 12
234146_at	0.961	0.034894	-2.24889	-4.19	-1.33405	B3GAT2	beta-1,3-glucuronyltransferase 2
244780_at	0.961	0.034951	-2.24811	-4.19	-1.82837	SGPP2	sphingosine-1-phosphate phosphatase 2
1568660_a_at	0.961	0.0349858	2.24764	-4.19	1.32808	LINC01568	long intergenic non-protein coding RNA 1568
240513_at	0.961	0.0350875	2.24625	-4.19	1.77333	EIF3M	eukaryotic translation initiation factor 3 subunit M
1557443_s_at	0.961	0.0351365	2.24558	-4.19	1.6083	HNCAT21	head and neck cancer-associated transcript 21
238964_at	0.961	0.0351524	2.24537	-4.19	1.15041	FIGN	fidgetin, microtubule severing factor
1560290_at	0.961	0.035154	-2.24534	-4.19	-1.15595
1565424_at	0.961	0.0351563	2.24531	-4.19	1.63789	LINC00529	long intergenic non-protein coding RNA 529
241664_x_at	0.961	0.0352094	2.24459	-4.19	1.61483
216754_at	0.961	0.0353024	2.24333	-4.19	1.04942
216775_at	0.961	0.0353059	2.24328	-4.19	1.82409	USP53	ubiquitin specific peptidase 53
1561597_x_at	0.961	0.0353077	2.24326	-4.19	1.57188
233189_at	0.961	0.0353247	2.24303	-4.19	1.25802
1568635_at	0.961	0.0354278	2.24164	-4.19	1.27568	LINC00354	long intergenic non-protein coding RNA 354
232721_at	0.961	0.035437	-2.24151	-4.19	-1.06575	TRIM55	tripartite motif containing 55
1561459_at	0.961	0.0354746	2.241	-4.19	1.09937	LOC101929526	uncharacterized LOC101929526
234278_at	0.961	0.0354753	2.24099	-4.19	1.08017
230284_at	0.961	0.0355372	2.24016	-4.19	1.2541	MYOM3	myomesin 3
240914_at	0.961	0.0355568	2.2399	-4.19	1.53836
1562373_at	0.961	0.035598	2.23934	-4.19	1.4438	ITPR1	inositol 1,4,5-trisphosphate receptor type 1
232300_at	0.961	0.0356211	-2.23903	-4.19	-1.04363	ADIRF-AS1	ADIRF antisense RNA 1
216834_at	0.961	0.0356412	2.23876	-4.19	2.29584	RGS1	regulator of G-protein signaling 1
240334_at	0.961	0.0356469	2.23869	-4.19	1.24024	LRFN5	leucine rich repeat and fibronectin type III domain containing 5
1563708_at	0.961	0.0356545	2.23858	-4.19	1.08348	SFXN5	sideroflexin 5
238648_at	0.961	0.03566	2.23851	-4.19	1.08334
211480_s_at	0.961	0.0356868	2.23815	-4.19	1.49445	SLCO1A2	solute carrier organic anion transporter family member 1A2
242986_at	0.961	0.0357095	2.23785	-4.19	1.25633	NAV1	neuron navigator 1
1555154_a_at	0.961	0.0357123	-2.23781	-4.19	-1.16541	QKI	QKI, KH domain containing RNA binding
1556096_s_at	0.961	0.0357182	2.23773	-4.19	1.49253	UNC13C	unc-13 homolog C
231394_at	0.961	0.0357275	2.23761	-4.19	1.31664	PCDHB3	protocadherin beta 3
234708_at	0.961	0.0357343	2.23752	-4.19	1.09815	SMUG1	single-strand-selective monofunctional uracil-DNA glycosylase 1
220068_at	0.961	0.0357866	-2.23681	-4.19	-1.12723	VPREB3	pre-B lymphocyte 3
1563681_at	0.961	0.0358696	2.23571	-4.2	1.30422
221413_at	0.961	0.0359037	2.23525	-4.2	1.06268	KCNAB3	potassium voltage-gated channel subfamily A regulatory beta subunit 3
221198_at	0.961	0.0359084	2.23519	-4.2	1.07995	SCT	secretin
233321_x_at	0.961	0.0359311	2.23489	-4.2	1.00945	LOC90834///BRD1	uncharacterized protein BC001742///bromodomain containing 1
237055_at	0.961	0.0359417	2.23474	-4.2	1.2285	ZNF649-AS1	ZNF649 antisense RNA 1
237346_at	0.961	0.0360044	2.23391	-4.2	1.20936	TGDS	TDP-glucose 4,6-dehydratase
209237_s_at	0.961	0.0360422	2.23341	-4.2	1.04856	SLC23A2	solute carrier family 23 member 2
234397_at	0.961	0.036054	2.23325	-4.2	1.08579
207519_at	0.961	0.0360569	-2.23321	-4.2	-1.39884	SLC6A4	solute carrier family 6 member 4
1565705_x_at	0.961	0.03609	2.23277	-4.2	1.33274
1559843_s_at	0.961	0.0360985	2.23266	-4.2	1.26736
1562107_at	0.961	0.0361149	2.23244	-4.2	1.21736	LOC101928833	uncharacterized LOC101928833
1565662_at	0.961	0.0361277	2.23227	-4.2	1.0025
217454_at	0.961	0.0361418	2.23209	-4.2	1.3397
210374_x_at	0.961	0.0361685	-2.23173	-4.2	-1.16473	PTGER3	prostaglandin E receptor 3
231329_at	0.961	0.0361981	-2.23134	-4.2	-1.85546
203902_at	0.961	0.0362373	2.23082	-4.2	1.64082	HEPH	hephaestin
1554911_at	0.961	0.0363624	2.22917	-4.2	1.01547	ABCC11	ATP binding cassette subfamily C member 11
225459_at	0.961	0.0363793	2.22895	-4.2	1.2049	AMOTL1	angiomotin like 1
226863_at	0.961	0.0363915	-2.22879	-4.2	-1.6346	FAM110C	family with sequence similarity 110 member C
213680_at	0.961	0.0364185	-2.22843	-4.2	-1.26375	KRT6B	keratin 6B
239280_at	0.961	0.0364695	2.22776	-4.2	1.46861
235917_at	0.961	0.0365116	2.22721	-4.2	1.27547	INIP	INTS3 and NABP interacting protein
211203_s_at	0.961	0.0365584	2.22659	-4.2	1.28594	CNTN1	contactin 1
216456_at	0.961	0.0365603	2.22657	-4.2	1.17253
234389_x_at	0.961	0.036592	2.22615	-4.2	1.61096
216795_at	0.961	0.0365944	2.22612	-4.2	1.57044
1562755_at	0.961	0.0366424	2.22549	-4.2	1.3969
236817_at	0.961	0.0366909	2.22486	-4.2	1.07995	ADAT2	adenosine deaminase, tRNA specific 2
208266_at	0.961	0.0367142	2.22455	-4.2	1.37451	C8orf17	chromosome 8 open reading frame 17
206291_at	0.961	0.0367149	2.22454	-4.2	1.42041	NTS	neurotensin
223858_at	0.961	0.0367428	-2.22418	-4.2	-1.11445	ESRRB	estrogen related receptor beta
211386_at	0.961	0.0367773	2.22373	-4.2	1.69677	MGC12488	uncharacterized protein MGC12488
206838_at	0.961	0.0367823	-2.22366	-4.2	-1.20637	TBX19	T-box 19
241752_at	0.961	0.0367997	2.22344	-4.2	1.0783	SLC8A1	solute carrier family 8 member A1
1569832_at	0.961	0.036821	-2.22316	-4.2	-1.23656	LOC100131655	uncharacterized LOC100131655
233672_s_at	0.961	0.0368426	2.22288	-4.2	1.60266	ZNF91	zinc finger protein 91
232428_at	0.961	0.0369744	2.22116	-4.2	1.16669	MOGAT2	monoacylglycerol O-acyltransferase 2
202751_at	0.961	0.0369886	2.22098	-4.2	1.01187	TFIP11	tuftelin interacting protein 11
214903_at	0.961	0.0370105	2.22069	-4.2	1.29178	SYT2	synaptotagmin 2
1565597_at	0.961	0.0370332	-2.2204	-4.2	-1.31813
1568915_at	0.961	0.0370439	2.22026	-4.2	1.22107
1566137_s_at	0.961	0.0370559	2.22011	-4.2	1.1949
229652_s_at	0.961	0.0370858	2.21972	-4.2	1.26563	FOXN3	forkhead box N3
223864_at	0.961	0.0370982	2.21956	-4.2	1.64312	ANKRD30A	ankyrin repeat domain 30A
1561527_at	0.961	0.0371618	2.21874	-4.2	1.07537	LINC01514	long intergenic non-protein coding RNA 1514
231758_at	0.961	0.0371987	2.21826	-4.2	1.10302	PRM3	protamine 3
1552370_at	0.961	0.0372082	2.21814	-4.2	1.13071	C4orf33	chromosome 4 open reading frame 33
234709_at	0.961	0.0372083	2.21814	-4.2	1.48066	CAPN13	calpain 13
226769_at	0.961	0.0372257	2.21791	-4.2	1.21357	FIBIN	fin bud initiation factor homolog (zebrafish)
227362_at	0.961	0.0372386	2.21774	-4.2	1.47487	SLC2A4RG	SLC2A4 regulator
238825_at	0.961	0.0372726	-2.21731	-4.2	-1.89036	ACRC	acidic repeat containing
1554321_a_at	0.961	0.037288	2.21711	-4.2	1.33876	NFS1	NFS1 cysteine desulfurase
233409_at	0.961	0.0373028	2.21692	-4.2	1.10885	RHBDL3	rhomboid like 3
216896_at	0.961	0.0373327	2.21653	-4.2	1.34865	COL4A3	collagen type IV alpha 3 chain
220319_s_at	0.961	0.0373437	-2.21639	-4.2	-1.61183	MYLIP	myosin regulatory light chain interacting protein
235102_x_at	0.961	0.0373488	2.21632	-4.2	1.21494	SNORD3D///SNORD3C///SNORD3B-2///SNORD3A///SNORD3B-1	small nucleolar RNA, C/D box 3D///small nucleolar RNA, C/D box 3C///small nucleolar RNA, C/D box 3B-2///small nucleolar RNA, C/D box 3A///small nucleolar RNA, C/D box 3B-1
242762_s_at	0.961	0.0373564	2.21623	-4.2	1.50004	FAM171B	family with sequence similarity 171 member B
213171_s_at	0.961	0.0373623	-2.21615	-4.2	-1.44961	MMP24	matrix metallopeptidase 24
207100_s_at	0.961	0.037404	-2.21561	-4.2	-1.1955	VAMP1	vesicle associated membrane protein 1
215653_at	0.961	0.037413	2.2155	-4.2	1.7798
244823_at	0.961	0.0374138	2.21549	-4.2	1.2103	LOC100129034	uncharacterized LOC100129034
234854_at	0.961	0.037471	2.21475	-4.2	1.42394	MDN1	midasin AAA ATPase 1
220187_at	0.961	0.0375226	2.21409	-4.2	1.68991	STEAP4	STEAP4 metalloreductase
233262_at	0.961	0.0375277	2.21403	-4.2	1.50307
203483_at	0.961	0.0376607	2.21233	-4.2	1.32402	SEMA4G	semaphorin 4G
234497_s_at	0.961	0.0377391	2.21133	-4.2	1.64019
239516_at	0.961	0.0377492	2.2112	-4.2	1.37052
234456_at	0.961	0.0377614	2.21104	-4.21	1.22029	MIR3656///TRAPPC4	microRNA 3656///trafficking protein particle complex 4
220435_at	0.961	0.037762	2.21104	-4.21	1.26822	SLC30A10	solute carrier family 30 member 10
214158_s_at	0.961	0.0378185	2.21032	-4.21	1.2444	PRDM10	PR/SET domain 10
237814_at	0.961	0.0378185	2.21032	-4.21	1.09192
222675_s_at	0.961	0.0378198	2.2103	-4.21	1.11431	BAIAP2L1	BAI1 associated protein 2 like 1
207031_at	0.961	0.0378232	2.21026	-4.21	1.4546	NKX3-2	NK3 homeobox 2
207623_at	0.961	0.0378868	-2.20945	-4.21	-1.57242	ABCF2	ATP binding cassette subfamily F member 2
1553080_at	0.961	0.0379001	2.20928	-4.21	1.23079	CSN1S2AP	casein alpha s2-like A, pseudogene
223773_s_at	0.961	0.0379216	-2.20901	-4.21	-1.23423	SNORA16A///SNORA61///SNORA44///SNHG12	small nucleolar RNA, H/ACA box 16A///small nucleolar RNA, H/ACA box 61///small nucleolar RNA, H/ACA box 44///small nucleolar RNA host gene 12
1556381_at	0.961	0.0379423	2.20874	-4.21	1.18523	NAA15	N(alpha)-acetyltransferase 15, NatA auxiliary subunit
1568904_at	0.961	0.0379469	2.20869	-4.21	1.12972	LOC105371708	uncharacterized LOC105371708
202873_at	0.961	0.0379646	2.20846	-4.21	1.11339	ATP6V1C1	ATPase H+ transporting V1 subunit C1
237079_at	0.961	0.0379778	2.20829	-4.21	1.13595
243063_at	0.961	0.037998	-2.20804	-4.21	-1.07009
240734_at	0.961	0.0380387	-2.20752	-4.21	-1.4308	LOC100507221	uncharacterized LOC100507221
205458_at	0.961	0.0380393	2.20751	-4.21	1.1181	MC1R	melanocortin 1 receptor
1557964_at	0.961	0.0380626	2.20722	-4.21	1.01181	EIF4G2	eukaryotic translation initiation factor 4 gamma 2
243888_at	0.961	0.038084	-2.20695	-4.21	-1.30055
230506_at	0.961	0.0380872	2.20691	-4.21	1.18066	LINC01590	long intergenic non-protein coding RNA 1590
211164_at	0.961	0.0381116	2.2066	-4.21	1.66339	EPHA3	EPH receptor A3
233464_at	0.961	0.0381483	2.20614	-4.21	1.55881	BCL2L14	BCL2 like 14
207260_at	0.961	0.0381615	2.20597	-4.21	1.23555	FEV	FEV, ETS transcription factor
222888_at	0.961	0.0381733	2.20582	-4.21	1.07043	CCNJ	cyclin J
206627_s_at	0.961	0.0381885	-2.20563	-4.21	-1.46596	SSX1	SSX family member 1
1561234_at	0.961	0.0381997	2.20549	-4.21	1.10036
237662_at	0.961	0.0382647	2.20467	-4.21	1.05408	SPATA19	spermatogenesis associated 19
235444_at	0.961	0.0382719	2.20458	-4.21	1.0429	FOXP1	forkhead box P1
234288_at	0.961	0.0382735	-2.20456	-4.21	-1.31467	LOC101929628	uncharacterized LOC101929628
240059_at	0.961	0.0382768	2.20452	-4.21	1.60359
221174_at	0.961	0.0383004	2.20422	-4.21	1.26012
214967_at	0.961	0.0383127	-2.20407	-4.21	-1.4019
203876_s_at	0.961	0.0384998	2.20172	-4.21	1.04444	MMP11	matrix metallopeptidase 11
220596_at	0.961	0.0385257	2.2014	-4.21	1.04764	GPATCH4	G-patch domain containing 4
1556758_at	0.961	0.0385388	2.20123	-4.21	1.2216	FAM208B	family with sequence similarity 208 member B
219136_s_at	0.961	0.0386074	-2.20038	-4.21	-1.1335	LMF1	lipase maturation factor 1
234620_at	0.961	0.0386669	2.19963	-4.21	1.41157
219567_s_at	0.961	0.0386799	2.19947	-4.21	1.37389	EXO5	exonuclease 5
1558310_s_at	0.961	0.0386883	2.19937	-4.21	1.08447	LOC100132356	uncharacterized LOC100132356
221200_at	0.961	0.038714	-2.19905	-4.21	-1.64697	ERVK3-2	endogenous retrovirus group K3 member 2
217146_at	0.961	0.0387478	2.19863	-4.21	1.21896	JRK	Jrk helix-turn-helix protein
214292_at	0.961	0.0388371	2.19752	-4.21	1.09183	ITGB4	integrin subunit beta 4
220266_s_at	0.961	0.0388533	-2.19732	-4.21	-1.26207	KLF4	Kruppel like factor 4
1566836_at	0.961	0.0388672	-2.19714	-4.21	-1.21488
243647_at	0.961	0.0389084	2.19663	-4.21	1.37991
1565697_at	0.961	0.0389193	2.1965	-4.21	1.39141
237218_at	0.961	0.0389261	2.19641	-4.21	1.19592
206940_s_at	0.961	0.0389308	2.19635	-4.21	1.05714	POU4F1	POU class 4 homeobox 1
220288_at	0.961	0.0389415	2.19622	-4.21	1.00785	MYO15A	myosin XVA
206210_s_at	0.961	0.0389672	-2.1959	-4.21	-1.31969	CETP	cholesteryl ester transfer protein
223891_at	0.961	0.0390428	2.19497	-4.21	1.42456	KCNQ5	potassium voltage-gated channel subfamily Q member 5
204406_at	0.961	0.0390689	2.19465	-4.21	1.25953	FLT1	fms related tyrosine kinase 1
1565861_at	0.961	0.039091	2.19437	-4.21	1.4173
230075_at	0.961	0.0390994	2.19427	-4.21	1.89153	RAB39B	RAB39B, member RAS oncogene family
238048_at	0.961	0.0391241	-2.19396	-4.21	-1.43434	CLASP2	cytoplasmic linker associated protein 2
224342_x_at	0.961	0.0391347	2.19383	-4.21	1.20737	BMS1P20	BMS1, ribosome biogenesis factor pseudogene 20
221080_s_at	0.961	0.0391604	2.19352	-4.21	1.08685	DENND1C	DENN domain containing 1C
227136_s_at	0.961	0.0392291	2.19267	-4.21	1.07033	CACUL1	CDK2 associated cullin domain 1
1565851_at	0.961	0.0392833	2.192	-4.21	1.27051
1568690_a_at	0.961	0.039286	2.19197	-4.21	1.29497	LOC100631378	uncharacterized 100631378
243393_at	0.961	0.0393182	2.19158	-4.21	1.58623
214408_s_at	0.961	0.0393457	2.19124	-4.21	1.5049	RFPL1S///RFPL3S	RFPL1 antisense RNA 1///RFPL3 antisense
222076_at	0.961	0.0393519	-2.19116	-4.21	-1.08296	HBEGF	heparin binding EGF like growth factor
220219_s_at	0.961	0.0393736	-2.1909	-4.21	-1.17	LRRC37A2///LRRC37A3///LRRC37A4P///LRRC37A	leucine rich repeat containing 37 member A2///leucine rich repeat containing 37 member A3///leucine rich repeat containing 37 member A4, pseudogene///leucine rich repeat containing 37A
205014_at	0.961	0.0393819	-2.19079	-4.21	-1.02745	FGFBP1	fibroblast growth factor binding protein 1
1568843_at	0.961	0.0393981	2.1906	-4.21	1.32513	TTLL13P	tubulin tyrosine ligase like 13, pseudogene
235017_s_at	0.961	0.0394177	2.19036	-4.21	1.2172	CSRNP3	cysteine and serine rich nuclear protein 3
1553375_at	0.961	0.0394647	-2.18978	-4.21	-1.41225	BTBD9	BTB domain containing 9
1564378_a_at	0.961	0.039468	-2.18974	-4.21	-1.19573
207584_at	0.961	0.039487	2.18951	-4.21	1.26978	LPA	lipoprotein(a)
220322_at	0.961	0.0395025	-2.18932	-4.21	-2.17504	IL36G	interleukin 36, gamma
221900_at	0.961	0.0395399	-2.18886	-4.21	-1.31988	COL8A2	collagen type VIII alpha 2 chain
1554485_s_at	0.961	0.0396009	-2.18812	-4.21	-1.63532	TMEM37	transmembrane protein 37
223523_at	0.961	0.0396016	2.18811	-4.21	1.35942	TMEM108	transmembrane protein 108
211082_x_at	0.961	0.0396024	-2.1881	-4.21	-1.23268	MARK2	microtubule affinity regulating kinase 2
1561106_at	0.961	0.0396185	2.1879	-4.21	1.35567	LINC00271	long intergenic non-protein coding RNA 271
217651_at	0.961	0.0396564	2.18744	-4.21	1.24311
221438_s_at	0.961	0.0397079	2.18681	-4.21	1.29075	TEX12	testis expressed 12
1560877_a_at	0.961	0.0397155	2.18672	-4.21	1.53948
205540_s_at	0.961	0.0397164	-2.18671	-4.21	-1.23834	RRAGB	Ras related GTP binding B
236725_at	0.961	0.0397204	2.18666	-4.21	1.33988	WWC1	WW and C2 domain containing 1
220626_at	0.961	0.0398513	-2.18507	-4.22	-1.39345	SERPINA10	serpin family A member 10
208406_s_at	0.961	0.0399611	2.18374	-4.22	1.07318	GRAP2	GRB2-related adaptor protein 2
235060_at	0.961	0.0399745	2.18358	-4.22	1.13323	LOC100190986	uncharacterized LOC100190986
216994_s_at	0.961	0.0399747	2.18358	-4.22	1.19127	RUNX2	runt related transcription factor 2
238384_x_at	0.961	0.0399946	2.18334	-4.22	1.65722
236800_at	0.961	0.0400009	-2.18326	-4.22	-1.18317	UCMA	upper zone of growth plate and cartilage matrix associated
232907_at	0.961	0.0400141	2.1831	-4.22	1.07908	UBR4	ubiquitin protein ligase E3 component n-recognin 4
237384_x_at	0.961	0.0400475	2.1827	-4.22	1.9095	KCTD16	potassium channel tetramerization domain containing 16
239914_at	0.961	0.0401078	-2.18197	-4.22	-1.39332
243512_x_at	0.961	0.0401239	2.18178	-4.22	1.18419
205932_s_at	0.961	0.0401279	-2.18173	-4.22	-1.19662	MSX1	msh homeobox 1
243418_at	0.961	0.040148	2.18148	-4.22	1.0268
1554433_a_at	0.961	0.0402136	-2.1807	-4.22	-1.22078	ZNF146	zinc finger protein 146
239860_at	0.961	0.040284	2.17985	-4.22	1.3033	LOC100130232	LP2209
243080_at	0.961	0.0402854	2.17983	-4.22	1.31273	HECW2	HECT, C2 and WW domain containing E3 ubiquitin protein ligase 2
229424_s_at	0.961	0.0403055	2.17959	-4.22	1.18394	ARHGAP27	Rho GTPase activating protein 27
1565660_at	0.961	0.0403192	2.17943	-4.22	1.06684	FUT6	fucosyltransferase 6
205027_s_at	0.961	0.0403451	-2.17912	-4.22	-1.27929	MAP3K8	mitogen-activated protein kinase kinase kinase 8
1553386_at	0.961	0.0403634	-2.1789	-4.22	-1.05597	MFSD2A	major facilitator superfamily domain containing 2A
216164_at	0.961	0.0404584	2.17776	-4.22	1.09022	LRRN2	leucine rich repeat neuronal 2
232096_x_at	0.961	0.0404635	2.1777	-4.22	1.00472	FOXP1-IT1	FOXP1 intronic transcript 1
233024_at	0.961	0.0404841	-2.17745	-4.22	-1.05183
1564821_at	0.961	0.0405039	2.17721	-4.22	1.37114
242335_at	0.961	0.0405306	-2.1769	-4.22	-1.28154	SLC25A37	solute carrier family 25 member 37
206419_at	0.961	0.0405717	-2.1764	-4.22	-1.0037	RORC	RAR related orphan receptor C
1561482_at	0.961	0.0405944	2.17613	-4.22	1.55136	RSU1P2	Ras suppressor protein 1 pseudogene 2
232508_at	0.961	0.0405953	2.17612	-4.22	1.18927	ZMIZ1	zinc finger MIZ-type containing 1
207720_at	0.961	0.0405954	2.17612	-4.22	1.16723	LOR	loricrin
1565900_at	0.961	0.0405987	2.17608	-4.22	1.14493	METTL15	methyltransferase like 15
1557588_at	0.961	0.0406441	2.17554	-4.22	1.1092	LINC01310	long intergenic non-protein coding RNA 1310
204653_at	0.961	0.0406753	-2.17517	-4.22	-1.12897	TFAP2A	transcription factor AP-2 alpha
204851_s_at	0.961	0.0406757	2.17516	-4.22	1.35983	DCX	doublecortin
235740_at	0.961	0.0406859	-2.17504	-4.22	-1.61708	MCTP1	multiple C2 and transmembrane domain containing 1
244452_at	0.961	0.0406875	2.17502	-4.22	1.11097	ERLEC1	endoplasmic reticulum lectin 1
238080_at	0.961	0.04073	2.17452	-4.22	1.21575	B4GALNT4	beta-1,4-N-acetyl-galactosaminyltransferase 4
224175_s_at	0.961	0.0407344	2.17447	-4.22	1.18856	TRIM6-TRIM34///TRIM34	TRIM6-TRIM34 readthrough///tripartite motif containing 34
205808_at	0.961	0.0407368	-2.17444	-4.22	-1.12534	ASPH	aspartate beta-hydroxylase
237406_at	0.961	0.0407458	2.17433	-4.22	1.28042	NEK6	NIMA related kinase 6
209403_at	0.961	0.0407739	-2.174	-4.22	-1.13124	TBC1D3I///TBC1D3E///LOC101060389///TBC1D3L///TBC1D3K///TBC1D3G///TBC1D3H///TBC1D3///TBC1D3C///TBC1D3F	TBC1 domain family member 3I///TBC1 domain family member 3E///TBC1 domain family member-like///TBC1 domain family member 3L///TBC1 domain family member 3K///TBC1 domain family member 3G///TBC1 domain family member 3H///TBC1 domain family member 3///TBC1 domain family member 3C///TBC1 domain family member 3F
210995_s_at	0.961	0.0407805	-2.17392	-4.22	-1.0652	TRIM23	tripartite motif containing 23
215048_at	0.961	0.0407848	2.17387	-4.22	1.07712	ZNF280B	zinc finger protein 280B
1563660_at	0.961	0.0408028	2.17365	-4.22	1.69095
1563477_at	0.961	0.0408041	2.17364	-4.22	1.61646
229701_at	0.961	0.0408364	2.17325	-4.22	1.46981	DNAJC9	DnaJ heat shock protein family (Hsp40) member C9
239500_at	0.961	0.0408383	2.17323	-4.22	1.21342	EFCAB1	EF-hand calcium binding domain 1
1552415_a_at	0.961	0.040878	2.17276	-4.22	1.02874	WFDC9	WAP four-disulfide core domain 9
239955_at	0.961	0.0408793	-2.17275	-4.22	-1.36129
216488_s_at	0.961	0.0409143	2.17233	-4.22	1.30606	ATP11A	ATPase phospholipid transporting 11A
1558722_at	0.961	0.0409184	2.17228	-4.22	1.10672	ZNF252P	zinc finger protein 252, pseudogene
209099_x_at	0.961	0.041005	-2.17126	-4.22	-1.10905	JAG1	jagged 1
214604_at	0.961	0.041007	-2.17123	-4.22	-1.16901	HOXD11	homeobox D11
239665_at	0.961	0.0410164	2.17112	-4.22	1.48362	LOC441179	uncharacterized LOC441179
241960_at	0.961	0.0410243	2.17103	-4.22	1.04165	CSMD1	CUB and Sushi multiple domains 1
241530_at	0.961	0.0410378	2.17087	-4.22	1.18194
207775_at	0.961	0.0410456	2.17078	-4.22	1.32014	MGC4859	uncharacterized LOC79150
1565617_at	0.961	0.041059	-2.17062	-4.22	-1.1292
213240_s_at	0.961	0.0410661	-2.17054	-4.22	-1.50033	KRT4	keratin 4
1558011_at	0.961	0.0411695	2.16932	-4.22	1.28391	LOC441081	POM121 membrane glycoprotein (rat) pseudogene
1555862_s_at	0.961	0.0411901	-2.16907	-4.22	-1.50816	MICALL2	MICAL like 2
236029_at	0.961	0.041212	2.16882	-4.22	1.35628	FAT3	FAT atypical cadherin 3
230422_at	0.961	0.0412225	2.16869	-4.22	1.47829	FPR3	formyl peptide receptor 3
236540_at	0.961	0.0413549	2.16714	-4.22	1.05444	TPGS2	tubulin polyglutamylase complex subunit 2
214587_at	0.961	0.0413796	2.16685	-4.22	1.34374	COL8A1	collagen type VIII alpha 1 chain
244762_at	0.961	0.0414079	2.16652	-4.22	1.66879
241046_at	0.961	0.0414122	2.16647	-4.22	1.59267	LOC102724511	uncharacterized LOC102724511
244612_at	0.961	0.0414388	2.16616	-4.22	1.5551
1552639_at	0.961	0.0414627	2.16588	-4.22	1.16888	KLHDC7B	kelch domain containing 7B
243826_at	0.961	0.0415013	2.16542	-4.22	1.00381
1569100_a_at	0.961	0.0416012	-2.16426	-4.22	-1.31557	LOC101929450	uncharacterized LOC101929450
243613_at	0.961	0.041611	2.16414	-4.22	1.40854	DENND5B	DENN domain containing 5B
1561956_at	0.961	0.041624	2.16399	-4.22	1.21943
1560896_a_at	0.961	0.0416599	2.16357	-4.22	1.60407
1559438_at	0.961	0.041661	2.16356	-4.22	1.12471	C21orf58	chromosome 21 open reading frame 58
204982_at	0.961	0.0416757	2.16339	-4.22	1.01864	GIT2	GIT ArfGAP 2
239892_at	0.961	0.0416803	2.16334	-4.22	1.4238
215470_at	0.961	0.0418226	2.16168	-4.22	1.16305	GTF2H2B	general transcription factor IIH subunit 2B (pseudogene)
205688_at	0.961	0.0418275	-2.16162	-4.22	-1.28481	TFAP4	transcription factor AP-4
1553317_s_at	0.961	0.0418318	-2.16157	-4.22	-1.64958	GPR82	G protein-coupled receptor 82
242925_at	0.961	0.0418378	-2.16151	-4.22	-1.79528	RNF148	ring finger protein 148
225611_at	0.961	0.0418501	-2.16136	-4.23	-1.04932	MAST4	microtubule associated serine/threonine kinase family member 4
216276_s_at	0.961	0.0418531	2.16133	-4.23	1.56097	ADAM3A	ADAM metallopeptidase domain 3A (pseudogene)
236171_at	0.961	0.0418758	2.16106	-4.23	1.14819	ATP2C2	ATPase secretory pathway Ca2+ transporting 2
243183_at	0.961	0.0419491	2.16021	-4.23	1.39336
233154_at	0.961	0.0419942	-2.15969	-4.23	-1.42186
231048_at	0.961	0.0420061	-2.15955	-4.23	-1.37563
241905_at	0.961	0.0420116	2.15949	-4.23	1.41155	PIK3C2A	phosphatidylinositol-4-phosphate 3-kinase catalytic subunit type 2 alpha
228782_at	0.961	0.0420559	2.15898	-4.23	1.17361	SCGB3A2	secretoglobin family 3A member 2
1552299_at	0.961	0.0421608	2.15777	-4.23	1.13661	AK9	adenylate kinase 9
207529_at	0.961	0.0421629	2.15774	-4.23	1.31034	DEFA5	defensin alpha 5
1565242_at	0.961	0.042174	2.15762	-4.23	1.611	TNXB	tenascin XB
204148_s_at	0.961	0.0421813	-2.15753	-4.23	-1.32168	POMZP3///ZP3	POM121 and ZP3 fusion///zona pellucida glycoprotein 3 (sperm receptor)
241141_at	0.961	0.04221	2.1572	-4.23	1.30691	BMP6	bone morphogenetic protein 6
243277_x_at	0.961	0.0422158	2.15714	-4.23	1.68926	MECOM	MDS1 and EVI1 complex locus
237236_x_at	0.961	0.0422224	2.15706	-4.23	1.20505	LINC00202-2	long intergenic non-protein coding RNA 202-2
233258_at	0.961	0.0422667	2.15655	-4.23	1.23997
1563027_at	0.961	0.042282	2.15637	-4.23	1.54741	LOC101927406	uncharacterized LOC101927406
220726_at	0.961	0.0422821	-2.15637	-4.23	-1.19553
239691_at	0.961	0.0423662	2.15541	-4.23	1.26189	C12orf77	chromosome 12 open reading frame 77
240943_at	0.961	0.0423782	2.15527	-4.23	1.40429
242385_at	0.961	0.0424179	-2.15481	-4.23	-1.20653	RORB	RAR related orphan receptor B
231614_at	0.961	0.0424327	2.15464	-4.23	1.10076	NOVA1	NOVA alternative splicing regulator 1
226764_at	0.961	0.0424364	2.1546	-4.23	1.01496	ZNF827	zinc finger protein 827
236263_at	0.961	0.0425437	2.15337	-4.23	1.18839	SHH	sonic hedgehog
231350_at	0.961	0.0425619	2.15317	-4.23	1.41554	LINC01350	long intergenic non-protein coding RNA 1350
216947_at	0.961	0.0426123	2.15259	-4.23	1.17357	DES	desmin
215325_x_at	0.961	0.0426235	2.15246	-4.23	1.25859	CBARP	CACN beta subunit associated regulatory protein
243389_at	0.961	0.042696	2.15164	-4.23	1.08546	PRH1-PRR4///PRR4///PRH1	PRH1-PRR4 readthrough///proline rich 4 (lacrimal)///proline rich protein HaeIII subfamily 1
1569020_at	0.961	0.0427187	-2.15138	-4.23	-1.24153	NEDD9	neural precursor cell expressed, developmentally down-regulated 9
1560659_at	0.961	0.0427263	2.15129	-4.23	1.24395	LINC00342	long intergenic non-protein coding RNA 342
1558552_s_at	0.961	0.0427279	2.15127	-4.23	1.45386	PQLC2L	PQ loop repeat containing 2 like
230085_at	0.961	0.0427355	2.15119	-4.23	1.22838	PDK3	pyruvate dehydrogenase kinase 3
216314_at	0.961	0.042738	2.15116	-4.23	1.25845	CRISP1	cysteine rich secretory protein 1
228761_at	0.961	0.0427686	-2.15081	-4.23	-1.08638	SCRT1	scratch family transcriptional repressor 1
233236_at	0.961	0.0427744	2.15074	-4.23	1.1044	TSPAN16	tetraspanin 16
228442_at	0.961	0.0427773	-2.15071	-4.23	-1.25948	NFATC2	nuclear factor of activated T-cells 2
211856_x_at	0.961	0.0427939	2.15052	-4.23	1.0864	CD28	CD28 molecule
244083_at	0.961	0.0428314	2.1501	-4.23	1.4372
1553485_at	0.961	0.0428373	2.15003	-4.23	1.37106	CCDC140	coiled-coil domain containing 140
234413_at	0.961	0.0428528	2.14985	-4.23	1.32913
1564143_at	0.961	0.0428669	2.14969	-4.23	1.10408
215611_at	0.961	0.0428748	2.1496	-4.23	1.55443	TCF12	transcription factor 12
1560453_at	0.961	0.0429414	2.14885	-4.23	1.28452
244085_at	0.961	0.0429562	2.14868	-4.23	1.20313	ZNF653	zinc finger protein 653
219191_s_at	0.961	0.042959	2.14865	-4.23	1.11748	BIN2	bridging integrator 2
233044_at	0.961	0.0430137	-2.14803	-4.23	-1.18532
236686_at	0.961	0.0430177	2.14798	-4.23	1.33553	MVK	mevalonate kinase
208062_s_at	0.961	0.0430205	2.14795	-4.23	1.31806	NRG2	neuregulin 2
225025_at	0.961	0.0430753	2.14733	-4.23	1.06868	IGSF8	immunoglobulin superfamily member 8
213443_at	0.961	0.0430812	-2.14726	-4.23	-1.43687	TRADD	TNFRSF1A associated via death domain
233800_at	0.961	0.0431193	2.14683	-4.23	1.23253
237684_at	0.961	0.0431598	2.14638	-4.23	1.4293	LOC100507461	uncharacterized LOC100507461
238249_at	0.961	0.0431701	-2.14626	-4.23	-1.39497	LOC101927499	uncharacterized LOC101927499
231282_at	0.961	0.0431913	2.14602	-4.23	1.03167
240663_at	0.961	0.0432346	-2.14553	-4.23	-1.21189
235537_at	0.961	0.043242	2.14545	-4.23	1.07866	OCIAD1	OCIA domain containing 1
1564039_at	0.961	0.0432495	2.14537	-4.23	1.27241	ZSCAN23	zinc finger and SCAN domain containing 23
1565778_at	0.961	0.043278	2.14505	-4.23	1.11056	ABCA8	ATP binding cassette subfamily A member 8
242274_x_at	0.961	0.0432977	-2.14482	-4.23	-1.27088	SLC25A42	solute carrier family 25 member 42
239990_at	0.961	0.043402	2.14365	-4.23	1.45113
1570221_at	0.961	0.0434338	2.14329	-4.23	1.42901
233151_s_at	0.961	0.0434915	2.14265	-4.23	1.05299	TTTY7B///TTTY7	testis-specific transcript, Y-linked 7B (non-protein coding)///testis-specific transcript, Y-linked 7 (non-protein coding)
201169_s_at	0.961	0.0435217	-2.14231	-4.23	-1.44656	BHLHE40	basic helix-loop-helix family member e40
207204_at	0.961	0.0435378	2.14213	-4.23	1.14163	FSCN2	fascin actin-bundling protein 2, retinal
230729_at	0.961	0.0435488	-2.142	-4.23	-1.23497
237137_at	0.961	0.0436043	-2.14138	-4.23	-1.02794	SCARNA2	small Cajal body-specific RNA 2
1561964_at	0.961	0.0436044	-2.14138	-4.23	-1.32506
207959_s_at	0.961	0.0436071	-2.14135	-4.23	-1.39175	DNAH9	dynein axonemal heavy chain 9
1556639_at	0.961	0.0436128	2.14129	-4.23	1.43205	LOC100996455	uncharacterized LOC100996455
205484_at	0.961	0.0436189	2.14122	-4.23	1.2127	SIT1	signaling threshold regulating transmembrane adaptor 1
226022_at	0.961	0.0436626	-2.14073	-4.23	-1.00428	SASH1	SAM and SH3 domain containing 1
215149_at	0.961	0.0436799	-2.14054	-4.23	-1.11787	AJAP1	adherens junctions associated protein 1
242354_at	0.961	0.0436822	2.14051	-4.23	1.05603
240750_at	0.961	0.0437036	2.14028	-4.23	1.61167
242000_at	0.961	0.0437825	2.1394	-4.23	1.48535	CASD1	CAS1 domain containing 1
239667_at	0.961	0.043802	-2.13918	-4.23	-1.1944	SLC3A1	solute carrier family 3 member 1
228779_at	0.961	0.0438314	2.13885	-4.23	1.25719	LOC146880	Rho GTPase activating protein 27 pseudogene
236440_at	0.961	0.0438911	-2.13819	-4.23	-1.05568	NETO1	neuropilin and tolloid like 1
225671_at	0.961	0.0438946	-2.13815	-4.23	-1.3632	SPNS2	sphingolipid transporter 2
1562473_at	0.961	0.0439307	2.13775	-4.23	1.75576
1564467_at	0.961	0.0439418	2.13762	-4.23	1.24762	FAM161A	family with sequence similarity 161 member A
1555982_at	0.961	0.0439636	2.13738	-4.23	1.06792	ZFYVE16	zinc finger FYVE-type containing 16
227099_s_at	0.961	0.0439853	-2.13714	-4.23	-1.93427	C11orf96	chromosome 11 open reading frame 96
232463_at	0.961	0.043989	2.1371	-4.23	1.08145	LINC00685	long intergenic non-protein coding RNA 685
207731_at	0.961	0.0440116	2.13685	-4.23	1.56901
217157_x_at	0.961	0.0440801	2.13609	-4.24	1.20177	IGK///IGKC	immunoglobulin kappa locus///immunoglobulin kappa constant
1559876_at	0.961	0.0440835	2.13605	-4.24	1.00103
206493_at	0.961	0.0440852	2.13603	-4.24	1.10322	ITGA2B	integrin subunit alpha 2b
1556158_at	0.961	0.0440987	2.13588	-4.24	1.54958	SAXO2	stabilizer of axonemal microtubules 2
241548_at	0.961	0.0441321	2.13552	-4.24	1.49858
242852_at	0.961	0.0441396	-2.13543	-4.24	-1.65109	LOC285147	uncharacterized LOC285147
1565908_at	0.961	0.0442256	2.13448	-4.24	1.18683	NADSYN1	NAD synthetase 1
233260_at	0.961	0.0442375	2.13435	-4.24	1.68182
1570119_at	0.961	0.044294	2.13373	-4.24	1.68307	PDS5B	PDS5 cohesin associated factor B
1562098_at	0.961	0.0444048	2.13251	-4.24	1.23851	UHRF1BP1L	UHRF1 binding protein 1 like
234829_at	0.961	0.0444317	-2.13221	-4.24	-1.11519	DUSP15	dual specificity phosphatase 15
240083_at	0.961	0.0444321	-2.13221	-4.24	-1.27922	SNORD112///MEG8	small nucleolar RNA, C/D box 112///maternally expressed 8 (non-protein coding)
210585_s_at	0.961	0.0444596	2.1319	-4.24	1.30528	TNPO2	transportin 2
216778_s_at	0.961	0.0444613	2.13189	-4.24	1.06533	CYLC1	cylicin 1
230823_at	0.961	0.0445112	2.13134	-4.24	1.0843
232449_at	0.961	0.0445615	-2.13079	-4.24	-1.13521	BCO2	beta-carotene oxygenase 2
220798_x_at	0.961	0.0445628	2.13077	-4.24	1.507	PLPPR3	phospholipid phosphatase related 3
233529_at	0.961	0.0445643	2.13076	-4.24	1.47511	LINC00396	long intergenic non-protein coding RNA 396
1555787_at	0.961	0.0445912	2.13046	-4.24	1.50424	C11orf63	chromosome 11 open reading frame 63
240461_at	0.961	0.0445984	2.13038	-4.24	1.51685
227791_at	0.961	0.0446185	-2.13016	-4.24	-1.39101	SLC9A9	solute carrier family 9 member A9
210099_at	0.961	0.04465	2.12982	-4.24	1.27858	ABCA2	ATP binding cassette subfamily A member 2
229060_at	0.961	0.0446519	-2.1298	-4.24	-1.52636	YPEL2	yippee like 2
1569234_at	0.961	0.0446641	2.12966	-4.24	1.2119
222484_s_at	0.961	0.0446922	-2.12936	-4.24	-1.38258	CXCL14	C-X-C motif chemokine ligand 14
215776_at	0.961	0.0447783	2.12842	-4.24	1.15137	INSRR	insulin receptor related receptor
204674_at	0.961	0.0447839	2.12835	-4.24	1.2548	LRMP	lymphoid restricted membrane protein
240525_at	0.961	0.0447847	2.12835	-4.24	1.06184
233356_at	0.961	0.0447908	2.12828	-4.24	1.35475
235719_at	0.961	0.0448128	2.12804	-4.24	1.40909	CYP4V2	cytochrome P450 family 4 subfamily V member 2
238897_at	0.961	0.0448356	2.12779	-4.24	1.18509	LRRC28	leucine rich repeat containing 28
1553024_at	0.961	0.0448634	-2.12749	-4.24	-1.6137	DAOA-AS1	DAOA antisense RNA 1
227843_at	0.961	0.0448759	2.12735	-4.24	1.20564	NDE1	nudE neurodevelopment protein 1
1552402_at	0.961	0.0449019	2.12707	-4.24	1.29856	CALML6	calmodulin like 6
1557180_at	0.961	0.0449071	2.12701	-4.24	1.62697	C11orf87	chromosome 11 open reading frame 87
243171_at	0.961	0.0449129	2.12695	-4.24	1.34427	LOC100128325	uncharacterized LOC100128325
237957_at	0.961	0.0449143	-2.12693	-4.24	-1.51372	LOC643711	platelet activating factor acetylhydrolase 1b catalytic subunit 2 pseudogene
236391_at	0.961	0.044928	2.12678	-4.24	1.56373
1562718_at	0.961	0.0449382	2.12667	-4.24	1.24081	LOC102724449	uncharacterized LOC102724449
224115_at	0.961	0.0449391	2.12666	-4.24	1.41655
212641_at	0.961	0.0449534	-2.12651	-4.24	-1.19251	HIVEP2	human immunodeficiency virus type I enhancer binding protein 2
201283_s_at	0.961	0.0449756	-2.12627	-4.24	-1.23076	TRAK1	trafficking kinesin protein 1
233950_at	0.961	0.044986	2.12615	-4.24	1.15535	CADPS	calcium dependent secretion activator
205765_at	0.961	0.0449962	-2.12604	-4.24	-1.37514	CYP3A5	cytochrome P450 family 3 subfamily A member 5
209189_at	0.961	0.0450293	-2.12568	-4.24	-1.63885	FOS	Fos proto-oncogene, AP-1 transcription factor subunit
1553461_at	0.961	0.0450311	2.12566	-4.24	1.19352	FAM9B	family with sequence similarity 9 member B
205193_at	0.961	0.0450361	-2.12561	-4.24	-1.00726	MAFF	MAF bZIP transcription factor F
1559508_at	0.961	0.0450686	2.12526	-4.24	1.14189
207208_at	0.961	0.0451544	-2.12433	-4.24	-1.17756	RBMXL2	RNA binding motif protein, X-linked like 2
205979_at	0.961	0.0451613	2.12425	-4.24	1.53463	SCGB2A1	secretoglobin family 2A member 1
243724_at	0.961	0.0452191	2.12363	-4.24	1.1313	SLC33A1	solute carrier family 33 member 1
241307_at	0.961	0.0452455	2.12334	-4.24	1.35572
1569927_at	0.961	0.0452989	-2.12276	-4.24	-1.2541
232259_s_at	0.961	0.0453567	2.12214	-4.24	1.09484	ZBTB11-AS1	ZBTB11 antisense RNA 1
209921_at	0.961	0.0454032	2.12164	-4.24	1.01281	SLC7A11	solute carrier family 7 member 11
206731_at	0.961	0.0454037	2.12163	-4.24	1.2411	CNKSR2	connector enhancer of kinase suppressor of Ras 2
206716_at	0.961	0.0454409	2.12123	-4.24	1.57171	UMOD	uromodulin
236875_at	0.961	0.0454509	-2.12112	-4.24	-1.52353	LOC100130705	uncharacterized LOC100130705
223131_s_at	0.961	0.0455015	2.12058	-4.24	1.2738	TRIM8	tripartite motif containing 8
234871_at	0.961	0.0455088	2.1205	-4.24	1.49856	ADGRV1	adhesion G protein-coupled receptor V1
233691_at	0.961	0.04552	-2.12038	-4.24	-2.15404
206473_at	0.961	0.0455345	-2.12022	-4.24	-1.04405	MBTPS2	membrane bound transcription factor peptidase, site 2
216104_at	0.961	0.0455601	2.11995	-4.24	1.19199
232461_at	0.961	0.0455881	2.11965	-4.24	1.24981	AHI1	Abelson helper integration site 1
241185_at	0.961	0.045612	-2.11939	-4.24	-1.19482	SAE1	SUMO1 activating enzyme subunit 1
1561473_at	0.961	0.0456602	2.11887	-4.24	1.53171	LOC102546226	uncharacterized LOC102546226
210538_s_at	0.961	0.0456672	-2.1188	-4.24	-1.41989	BIRC3	baculoviral IAP repeat containing 3
228015_s_at	0.961	0.0456888	-2.11857	-4.24	-1.22499	TRIM8	tripartite motif containing 8
1558903_at	0.961	0.0457645	2.11776	-4.24	1.05035	LINC00907	long intergenic non-protein coding RNA 907
241113_at	0.961	0.0458178	-2.11719	-4.24	-1.29589
1558121_at	0.961	0.0458264	2.11709	-4.24	1.30105	CSRNP3	cysteine and serine rich nuclear protein 3
229116_at	0.961	0.0458649	2.11668	-4.24	1.16681	CNKSR2	connector enhancer of kinase suppressor of Ras 2
214787_at	0.961	0.0458813	-2.11651	-4.24	-1.13332	DENND4A	DENN domain containing 4A
240737_at	0.961	0.0459381	2.1159	-4.24	1.02349
237135_at	0.961	0.0459898	2.11535	-4.24	1.61141
39248_at	0.961	0.0460328	-2.11489	-4.24	-1.02443	AQP3	aquaporin 3 (Gill blood group)
1557770_at	0.961	0.0460451	-2.11476	-4.24	-1.47544	IPO11	importin 11
1554314_at	0.961	0.0460798	-2.11439	-4.24	-1.31842	C6orf141	chromosome 6 open reading frame 141
237042_at	0.961	0.0461165	2.114	-4.24	1.33777
234277_at	0.961	0.0461336	2.11382	-4.24	1.93589
233291_at	0.961	0.0461601	-2.11354	-4.24	-1.09787
204938_s_at	0.961	0.0461882	2.11324	-4.24	1.19657	PLN	phospholamban
1559580_at	0.961	0.0461902	2.11322	-4.24	1.36845	LRRC39	leucine rich repeat containing 39
1557479_at	0.961	0.0462063	2.11305	-4.24	1.35354	LOC101928718	uncharacterized LOC101928718
243755_at	0.961	0.0462207	-2.1129	-4.24	-1.2467	PRLR	prolactin receptor
225641_at	0.961	0.0462737	2.11233	-4.24	1.09866	MEF2D	myocyte enhancer factor 2D
204272_at	0.961	0.0463064	2.11199	-4.24	1.11823	LGALS4	galectin 4
1568834_s_at	0.961	0.0463164	2.11188	-4.24	1.2364	CCDC90B	coiled-coil domain containing 90B
227209_at	0.961	0.0464167	2.11082	-4.25	1.37276	CNTN1	contactin 1
212588_at	0.961	0.0464403	2.11057	-4.25	1.66243	PTPRC	protein tyrosine phosphatase, receptor type C
208272_at	0.961	0.0464993	2.10995	-4.25	1.13053	RANBP3	RAN binding protein 3
242606_at	0.961	0.0465255	2.10967	-4.25	1.46673
227851_s_at	0.961	0.0465455	2.10946	-4.25	1.06463
1560171_at	0.961	0.0465795	2.1091	-4.25	1.22876
242236_at	0.961	0.0465921	2.10897	-4.25	1.59326
240617_at	0.961	0.046594	2.10895	-4.25	1.04982	TONSL-AS1	TONSL antisense RNA 1
214412_at	0.961	0.0465958	2.10893	-4.25	1.30053	H2AFB1///H2AFB2///H2AFB3	H2A histone family member B1///H2A histone family member B2///H2A histone family member B3
1556206_at	0.961	0.0466264	2.10861	-4.25	1.06008	LINC00408	long intergenic non-protein coding RNA 408
238769_at	0.961	0.0466558	-2.1083	-4.25	-1.26706
231440_at	0.961	0.0467106	2.10772	-4.25	1.36242	LINC00943	long intergenic non-protein coding RNA 943
241324_at	0.961	0.0467247	2.10757	-4.25	1.22599
205192_at	0.961	0.0467488	-2.10732	-4.25	-1.07037	MAP3K14	mitogen-activated protein kinase kinase kinase 14
212336_at	0.961	0.046764	-2.10716	-4.25	-1.09659	EPB41L1	erythrocyte membrane protein band 4.1 like 1
215078_at	0.961	0.0467937	-2.10685	-4.25	-2.21719	LOC100129518///SOD2	uncharacterized LOC100129518///superoxide dismutase 2, mitochondrial
204940_at	0.961	0.0468028	2.10675	-4.25	1.2307	PLN	phospholamban
217670_at	0.961	0.0468059	2.10672	-4.25	1.35799	RPLP2	ribosomal protein lateral stalk subunit P2
207758_at	0.961	0.046869	2.10606	-4.25	1.46931
202644_s_at	0.961	0.046889	-2.10585	-4.25	-1.14865	TNFAIP3	TNF alpha induced protein 3
226991_at	0.961	0.0469028	-2.10571	-4.25	-1.41981	NFATC2	nuclear factor of activated T-cells 2
232541_at	0.961	0.0470021	-2.10467	-4.25	-1.04938
230760_at	0.961	0.0470562	2.1041	-4.25	1.40923	ZFY	zinc finger protein, Y-linked
236306_at	0.961	0.0470676	-2.10398	-4.25	-1.0458	KIAA2026	KIAA2026
205885_s_at	0.961	0.0470879	2.10377	-4.25	1.53561	ITGA4	integrin subunit alpha 4
1566487_at	0.961	0.0471768	2.10285	-4.25	1.58852
1552280_at	0.961	0.047227	2.10232	-4.25	1.36444	TIMD4	T-cell immunoglobulin and mucin domain containing 4
215051_x_at	0.961	0.0472368	2.10222	-4.25	1.38435	AIF1	allograft inflammatory factor 1
211741_x_at	0.961	0.047246	2.10213	-4.25	1.19206	PSG3	pregnancy specific beta-1-glycoprotein 3
1554723_x_at	0.961	0.0472511	2.10207	-4.25	1.7478
[truncated: 91 more rows]

## Sheet: TableS5_common_DiffExp_genes
94 common elements in "RNASeq" and "GSE33874":
ACSM3
CLDN18
PPP1R12B
ACTN2
IZUMO4
ANGPT4
NEFM
HLF
SULT1E1
C7
SLC5A9
KLF9
NR4A3
PDZRN3
PLG
SERPINA7
RAB9B
WNK4
SSX1
LRRC17
HOXD11
ZNF331
TRPC4
DOCK10
GATA4
KLF4
UNC13C
NDST4
MTTP
PPFIA2
SERPINA10
ABCA8
ASXL3
CELA3A
DPT
CRNN
TRPC1
AKAP4
PMP2
PLEKHH2
PID1
PDE1C
JAM2
KCNS2
BTG2
FEV
PI16
DEFA5
GEM
NFIL3
UCMA
TVP23A
ZCCHC18
YPEL4
EPB42
RBFOX3
TNXB
COL4A3
PDGFD
FGG
LGALS4
GATM
ZNF540
AQP4
DES
UBQLNL
TCERG1L
FAM9B
NRXN1
CSMD1
CCBE1
TRABD2A
C11orf96
ADRB3
NKAPL
ZNF781
SLC30A10
SPRR2B
PLN
DPF3
MTMR9LP
PCOLCE-AS1
TEX26-AS1
LINC00685
LINC00342
GRID1-AS1
TRHDE-AS1
MEF2C-AS1
PKIA-AS1
DIO3OS
LINC01539
CASC15
ADIRF-AS1
CCL23

## Sheet: TableS6_94_Diff_KM_analysis
number	gene symbol	HR(min)	HR(max)	p value
1	ACSM3	0.69	0.9	0.00047
2	CLDN18	0.77	1.05	0.19
3	PPP1R12B	0.72	0.95	0.0069
4	ACTN2	0.82	1.06	0.28
5	IZUMO4	1.02	1.53	0.028
6	ANGPT4	0，97	1.26	0.15
7	NEFM	0.99	1.28	0.073
8	HLF	0.72	0.96	0.011
9	SULT1E1	0.99	1.59	0.06
10	C7	0.78	1.01	0.08
11	SLC5A9	1.05	1.6	0.014
12	KLF9	1.09	1.42	0.0015
13	NR4A3	0.94	1.22	0.29
14	PDZRN3	1.14	1.48	6.6e-05
15	PLG	0.67	1.01	0.06
16	SERPINA7	0.76	0.98	0.028
17	RAB9B	0.89	1.41	0.34
18	WNK4	0.99	1.61	0.06
19	SSX1	1.09	1.42	0.0013
20	LRRC17	1.2	1.56	1.7e-06
21	HOXD11	0.81	1.06	0.26
22	ZNF331	0.93	1.4	0.21
23	TRPC4	0.97	1.3	0.11
24	DOCK10	0.94	1.23	0.28
25	GATA4	0.99	1.53	0.056
26	KLF4	0.67	1.03	0.084
27	UNC13C	0.78	1.46	0.7
28	NDST4	0.71	1.1	0.27
29	MTTP	0.7	1.08	0.2
30	PPFIA2	0.73	1.36	0.98
31	SERPINA10	0.94	1.44	0.17
32	ABCA8	0.51	0.79	3.1e-05
33	ASXL3	0.63	1.18	0.36
34	CELA3A	0.71	1.09	0.24
35	DPT	0.57	0.88	0.0019
36	CRNN	0.84	1.28	0.73
37	TRPC1	0.66	1.02	0.068
38	AKAP4	0.84	1.28	0.74
39	PMP2	0.96	1.79	0.091
40	PLEKHH2	0.63	1.18	0.34
41	PID1	0.63	0.97	0.028
42	PDE1C	0.75	1.15	0.51
43	JAM2	0.51	0.95	0.021
44	KCNS2	0.75	1.41	0.86
45	BTG2	0.5	0.77	1.1e-05
46	FEV	0.71	1.09	0.23
47	PI16	0.65	1.21	0.44
48	DEFA5	0.74	1.13	0.39
49	GEM	0.61	0.94	0.01
50	NFIL3	0.9	1.37	0.34
51	UCMA	0.81	1.51	0.54
52	TVP23A	0.63	1.19	0.37
53	ZCCHC18	0.51	0.96	0.024
54	YPEL4	0.53	1	0.0499
55	EPB42	0.71	1.09	0.25
56	RBFOX3	0.83	1.56	0.41
57	TNXB	0.83	1.27	0.79
58	COL4A3	0.59	0.91	0.0047
59	PDGFD	0.56	0.87	0.001
60	FGG	0.87	1.33	0.49
61	LGALS4	0.68	1.05	0.12
62	GATM	0.82	1.53	0.49
63	ZNF540	0.42	0.79	0.00062
64	AQP4	1	1.88	0.049
65	DES	0.78	1.19	0.71
66	UBQLNL	0.39	0.73	9.4e-05
67	TCERG1L	0.72	1.35	0.92
68	FAM9B	0.64	1.2	0.41
69	NRXN1	0.79	1.48	0.61
70	CSMD1	0.72	1.34	0.92
71	CCBE1	0.57	1.07	0.13
72	TRABD2A	0.63	1.17	0.34
73	C11orf96	0.76	1.42	0.83
74	ADRB3	0.69	1.06	0.15
75	NKAPL	0.85	1.59	0.35
76	ZNF781	0.42	0.8	0.00082
77	SLC30A10	0.77	1.17	0.62
78	SPRR2B	0,84	1.29	0.7
79	PLN	0.68	1.05	0.13
80	DPF3	0.74	1.13	0.41
81	MTMR9LP	0.93	1.76	0.13
82	PCOLCE-AS1	0.6	1.13	0.23
83	TEX26-AS1	0.87	1.63	0.27
84	LINC00685	0.63	1.17	0.34
85	LINC00342	0.69	1.3	0.74
86	GRID1-AS1	0.8	1.49	0.58
87	TRHDE-AS1	0.92	1.73	0.15
88	MEF2C-AS1	0.55	1.02	0.069
89	PKIA-AS1	0.66	1.23	0.51
90	DIO3OS	0.82	1.54	0.46
91	LINC01539	0.64	1.19	0.39
92	CASC15	0.88	1.64	0.26
93	ADIRF-AS1
94	CCL23	0.87	1.33	0.53

## Sheet: TableS7_24_ANOVA_grade
Number	Gene symbol	Tukey's multiple comparisons test	Mean Diff.	95.00% CI of diff.	Significant?	Summary	Adjusted P Value		P value
1	ACSM3	G1 vs. G2	3.163	1.144 to 5.183	Yes	***	0.0004	A-B	0.0002
		G1 vs. G3	3.301	1.301 to 5.302	Yes	***	0.0002	A-C
		G1 vs. G4	2.654	-0.1710 to 5.479	No	ns	0.0743	A-D
		G2 vs. G3	0.138	-0.1799 to 0.4559	No	ns	0.6774	B-C
		G2 vs. G4	-0.5095	-2.529 to 1.510	No	ns	0.9152	B-D
		G3 vs. G4	-0.6474	-2.648 to 1.353	No	ns	0.8377	C-D
2	PPP1R12B	G1 vs. G2	2.968	1.801 to 4.136	Yes	****	<0.0001	A-B	<0.0001
		G1 vs. G3	2.929	1.772 to 4.086	Yes	****	<0.0001	A-C
		G1 vs. G4	2.98	1.346 to 4.613	Yes	****	<0.0001	A-D
		G2 vs. G3	-0.03921	-0.2230 to 0.1446	No	ns	0.9463	B-C
		G2 vs. G4	0.01126	-1.156 to 1.179	No	ns	>0.9999	B-D
		G3 vs. G4	0.05047	-1.106 to 1.207	No	ns	0.9995	C-D
3	IZUMO4	G1 vs. G2	0.6647	-0.1967 to 1.526	No	ns	0.193	A-B	0.1562
		G1 vs. G3	0.701	-0.1523 to 1.554	No	ns	0.1486	A-C
		G1 vs. G4	0.8857	-0.3191 to 2.090	No	ns	0.2309	A-D
		G2 vs. G3	0.0363	-0.09928 to 0.1719	No	ns	0.9005	B-C
		G2 vs. G4	0.221	-0.6403 to 1.082	No	ns	0.9111	B-D
		G3 vs. G4	0.1847	-0.6685 to 1.038	No	ns	0.9441	C-D
4	HLF	G1 vs. G2	2.78	1.953 to 3.608	Yes	****	<0.0001	A-B	<0.0001
		G1 vs. G3	2.806	1.986 to 3.625	Yes	****	<0.0001	A-C
		G1 vs. G4	3.051	1.894 to 4.207	Yes	****	<0.0001	A-D
		G2 vs. G3	0.02534	-0.1048 to 0.1555	No	ns	0.9585	B-C
		G2 vs. G4	0.2701	-0.5570 to 1.097	No	ns	0.8339	B-D
		G3 vs. G4	0.2448	-0.5746 to 1.064	No	ns	0.8675	C-D
5	SLC5A9	G1 vs. G2	0.03588	-0.3819 to 0.4537	No	ns	0.9962	A-B	0.9307
		G1 vs. G3	0.02079	-0.3931 to 0.4347	No	ns	0.9992	A-C
		G1 vs. G4	0.06633	-0.5181 to 0.6507	No	ns	0.9912	A-D
		G2 vs. G3	-0.01509	-0.08085 to 0.05067	No	ns	0.9344	B-C
		G2 vs. G4	0.03045	-0.3873 to 0.4482	No	ns	0.9976	B-D
		G3 vs. G4	0.04554	-0.3683 to 0.4594	No	ns	0.992	C-D
6	KLF9	G1 vs. G2	1.689	-0.09870 to 3.477	No	ns	0.0718	A-B	0.0934
		G1 vs. G3	1.579	-0.1923 to 3.350	No	ns	0.0997	A-C
		G1 vs. G4	1.446	-1.055 to 3.947	No	ns	0.4432	A-D
		G2 vs. G3	-0.1104	-0.3918 to 0.1711	No	ns	0.7425	B-C
		G2 vs. G4	-0.2431	-2.031 to 1.545	No	ns	0.9851	B-D
		G3 vs. G4	-0.1328	-1.904 to 1.638	No	ns	0.9974	C-D
7	PDZRN3	G1 vs. G2	1.751	-0.3438 to 3.846	No	ns	0.1373	A-B	0.1816
		G1 vs. G3	1.704	-0.3712 to 3.780	No	ns	0.1489	A-C
		G1 vs. G4	2.096	-0.8345 to 5.027	No	ns	0.2536	A-D
		G2 vs. G3	-0.0471	-0.3769 to 0.2827	No	ns	0.9829	B-C
		G2 vs. G4	0.3447	-1.750 to 2.440	No	ns	0.9742	B-D
		G3 vs. G4	0.3918	-1.684 to 2.467	No	ns	0.9619	C-D
8	SERPINA7	G1 vs. G2	-0.0001516	-0.02691 to 0.02661	No	ns	>0.9999	A-B	0.8409
		G1 vs. G3	-0.001608	-0.02811 to 0.02490	No	ns	0.9986	A-C
		G1 vs. G4	0	-0.03743 to 0.03743	No	ns	>0.9999	A-D
		G2 vs. G3	-0.001457	-0.005669 to 0.002755	No	ns	0.8086	B-C
		G2 vs. G4	0.0001516	-0.02661 to 0.02691	No	ns	>0.9999	B-D
		G3 vs. G4	0.001608	-0.02490 to 0.02811	No	ns	0.9986	C-D
9	SSX1	G1 vs. G2	-0.2685	-2.385 to 1.848	No	ns	0.9879	A-B	0.8292
		G1 vs. G3	-0.2915	-2.388 to 1.805	No	ns	0.9841	A-C
		G1 vs. G4	-0.9798	-3.940 to 1.980	No	ns	0.8283	A-D
		G2 vs. G3	-0.023	-0.3561 to 0.3101	No	ns	0.998	B-C
		G2 vs. G4	-0.7113	-2.827 to 1.405	No	ns	0.8216	B-D
		G3 vs. G4	-0.6883	-2.785 to 1.408	No	ns	0.8317	C-D
10	LRRC17	G1 vs. G2	4.598	2.047 to 7.149	Yes	****	<0.0001	A-B	<0.0001
		G1 vs. G3	4.739	2.212 to 7.266	Yes	****	<0.0001	A-C
		G1 vs. G4	4.767	1.199 to 8.335	Yes	**	0.0035	A-D
		G2 vs. G3	0.1409	-0.2606 to 0.5425	No	ns	0.8018	B-C
		G2 vs. G4	0.1693	-2.382 to 2.720	No	ns	0.9982	B-D
		G3 vs. G4	0.0284	-2.499 to 2.555	No	ns	>0.9999	C-D
11	ABCA8	G1 vs. G2	3.195	2.474 to 3.916	Yes	****	<0.0001	A-B	<0.0001
		G1 vs. G3	3.232	2.518 to 3.947	Yes	****	<0.0001	A-C
		G1 vs. G4	3.217	2.208 to 4.225	Yes	****	<0.0001	A-D
		G2 vs. G3	0.03703	-0.07648 to 0.1505	No	ns	0.8344	B-C
		G2 vs. G4	0.02138	-0.6997 to 0.7425	No	ns	0.9998	B-D
		G3 vs. G4	-0.01565	-0.7300 to 0.6987	No	ns	>0.9999	C-D
12	DPT	G1 vs. G2	2.464	0.07486 to 4.853	Yes	*	0.0403	A-B	0.0041
		G1 vs. G3	2.76	0.3932 to 5.127	Yes	*	0.0148	A-C
		G1 vs. G4	3.388	0.04604 to 6.730	Yes	*	0.0455	A-D
		G2 vs. G3	0.2959	-0.08019 to 0.6720	No	ns	0.1786	B-C
		G2 vs. G4	0.9239	-1.465 to 3.313	No	ns	0.7506	B-D
		G3 vs. G4	0.628	-1.739 to 2.995	No	ns	0.9029	C-D
13	PID1	G1 vs. G2	2.907	1.388 to 4.425	Yes	****	<0.0001	A-B	<0.0001
		G1 vs. G3	3.161	1.657 to 4.665	Yes	****	<0.0001	A-C
		G1 vs. G4	3.055	0.9308 to 5.179	Yes	**	0.0014	A-D
		G2 vs. G3	0.2545	0.01549 to 0.4935	Yes	*	0.0318	B-C
		G2 vs. G4	0.1482	-1.370 to 1.667	No	ns	0.9944	B-D
		G3 vs. G4	-0.1063	-1.611 to 1.398	No	ns	0.9978	C-D
14	JAM2	G1 vs. G2	3.102	1.398 to 4.806	Yes	****	<0.0001	A-B	<0.0001
		G1 vs. G3	3.141	1.453 to 4.829	Yes	****	<0.0001	A-C
		G1 vs. G4	3.69	1.307 to 6.073	Yes	***	0.0005	A-D
		G2 vs. G3	0.03904	-0.2292 to 0.3072	No	ns	0.9819	B-C
		G2 vs. G4	0.5878	-1.116 to 2.292	No	ns	0.8098	B-D
		G3 vs. G4	0.5488	-1.139 to 2.237	No	ns	0.8357	C-D
15	BTG2	G1 vs. G2	1.846	-0.5320 to 4.224	No	ns	0.1886	A-B	0.0017
		G1 vs. G3	2.001	-0.3541 to 4.357	No	ns	0.1271	A-C
		G1 vs. G4	-0.838	-4.164 to 2.488	No	ns	0.9154	A-D
		G2 vs. G3	0.1556	-0.2187 to 0.5299	No	ns	0.7062	B-C
		G2 vs. G4	-2.684	-5.062 to -0.3060	Yes	*	0.0198	B-D
		G3 vs. G4	-2.839	-5.195 to -0.4839	Yes	*	0.0108	C-D
16	GEM	G1 vs. G2	1.371	-0.6495 to 3.392	No	ns	0.2987	A-B	0.2639
		G1 vs. G3	1.391	-0.6109 to 3.393	No	ns	0.2782	A-C
		G1 vs. G4	2.062	-0.7647 to 4.889	No	ns	0.2373	A-D
		G2 vs. G3	0.01955	-0.2985 to 0.3376	No	ns	0.9986	B-C
		G2 vs. G4	0.6906	-1.330 to 2.711	No	ns	0.8142	B-D
		G3 vs. G4	0.671	-1.331 to 2.673	No	ns	0.8228	C-D
17	ZCCHC18	G1 vs. G2	1.372	0.7268 to 2.018	Yes	****	<0.0001	A-B	<0.0001
		G1 vs. G3	1.411	0.7716 to 2.050	Yes	****	<0.0001	A-C
		G1 vs. G4	1.542	0.6389 to 2.444	Yes	****	<0.0001	A-D
		G2 vs. G3	0.0387	-0.06289 to 0.1403	No	ns	0.7592	B-C
		G2 vs. G4	0.1694	-0.4760 to 0.8148	No	ns	0.9056	B-D
		G3 vs. G4	0.1307	-0.5086 to 0.7700	No	ns	0.9523	C-D
18	YPEL4	G1 vs. G2	1.019	0.03814 to 1.999	Yes	*	0.0382	A-B	0.0401
		G1 vs. G3	1.056	0.08492 to 2.028	Yes	*	0.027	A-C
		G1 vs. G4	1.211	-0.1604 to 2.583	No	ns	0.1048	A-D
		G2 vs. G3	0.03757	-0.1168 to 0.1919	No	ns	0.9229	B-C
		G2 vs. G4	0.1924	-0.7881 to 1.173	No	ns	0.9575	B-D
		G3 vs. G4	0.1549	-0.8165 to 1.126	No	ns	0.9765	C-D
19	COL4A3	G1 vs. G2	0.1612	-0.5781 to 0.9005	No	ns	0.943	A-B	0.9066
		G1 vs. G3	0.146	-0.5864 to 0.8783	No	ns	0.9556	A-C
		G1 vs. G4	0.2642	-0.7698 to 1.298	No	ns	0.9122	A-D
		G2 vs. G3	-0.01522	-0.1316 to 0.1011	No	ns	0.9867	B-C
		G2 vs. G4	0.103	-0.6362 to 0.8423	No	ns	0.984	B-D
		G3 vs. G4	0.1183	-0.6141 to 0.8506	No	ns	0.9756	C-D
20	PDGFD	G1 vs. G2	3.517	1.492 to 5.543	Yes	****	<0.0001	A-B	<0.0001
		G1 vs. G3	3.581	1.575 to 5.587	Yes	****	<0.0001	A-C
		G1 vs. G4	4.173	1.340 to 7.006	Yes	***	0.001	A-D
		G2 vs. G3	0.06352	-0.2553 to 0.3823	No	ns	0.9557	B-C
		G2 vs. G4	0.6556	-1.370 to 2.681	No	ns	0.8375	B-D
		G3 vs. G4	0.5921	-1.414 to 2.598	No	ns	0.8716	C-D
21	ZNF540	G1 vs. G2	0.919	0.3415 to 1.496	Yes	***	0.0003	A-B	0.0007
		G1 vs. G3	0.9209	0.3489 to 1.493	Yes	***	0.0002	A-C
		G1 vs. G4	1.015	0.2068 to 1.822	Yes	**	0.0071	A-D
		G2 vs. G3	0.001915	-0.08898 to 0.09281	No	ns	>0.9999	B-C
		G2 vs. G4	0.0955	-0.4820 to 0.6730	No	ns	0.9739	B-D
		G3 vs. G4	0.09358	-0.4785 to 0.6656	No	ns	0.9747	C-D
22	AQP4	G1 vs. G2	0.007943	-0.8289 to 0.8448	No	ns	>0.9999	A-B	0.9573
		G1 vs. G3	-0.009092	-0.8381 to 0.8199	No	ns	>0.9999	A-C
		G1 vs. G4	0.1374	-1.033 to 1.308	No	ns	0.9903	A-D
		G2 vs. G3	-0.01703	-0.1488 to 0.1147	No	ns	0.9872	B-C
		G2 vs. G4	0.1294	-0.7075 to 0.9663	No	ns	0.9784	B-D
		G3 vs. G4	0.1465	-0.6826 to 0.9755	No	ns	0.9684	C-D
23	UBQLNL	G1 vs. G2	-0.07991	-0.8376 to 0.6777	No	ns	0.9929	A-B	0.9755
		G1 vs. G3	-0.06421	-0.8148 to 0.6863	No	ns	0.9962	A-C
		G1 vs. G4	-0.1278	-1.188 to 0.9320	No	ns	0.9895	A-D
		G2 vs. G3	0.0157	-0.1036 to 0.1350	No	ns	0.9865	B-C
		G2 vs. G4	-0.04789	-0.8055 to 0.7098	No	ns	0.9985	B-D
		G3 vs. G4	-0.06359	-0.8141 to 0.6870	No	ns	0.9963	C-D
24	ZNF781	G1 vs. G2	0.7222	0.09527 to 1.349	Yes	*	0.0165	A-B	0.0224
		G1 vs. G3	0.703	0.08203 to 1.324	Yes	*	0.0193	A-C
		G1 vs. G4	0.9261	0.04922 to 1.803	Yes	*	0.0338	A-D
		G2 vs. G3	-0.01914	-0.1178 to 0.07954	No	ns	0.9589	B-C
		G2 vs. G4	0.2039	-0.4230 to 0.8308	No	ns	0.8356	B-D
		G3 vs. G4	0.2231	-0.3979 to 0.8441	No	ns	0.7904	C-D

## Sheet: TableS8_staining_index_analysi
Table Analyzed	Data 1
Repeated measures ANOVA summary
Assume sphericity?	No
F	0.6091
P value	0.5781
P value summary	ns
Statistically significant (P < 0.05)?	No
Geisser-Greenhouse's epsilon	0.125
R square	0.3785
Was the matching effective?
F	6.306
P value	0.0363
P value summary	*
Is there significant matching (P < 0.05)?	Yes
R square	0.3288
ANOVA table	SS	DF	MS	F (DFn, DFd)	P value
Treatment (between columns)	20.78	8	2.597	F (1.000, 1.000) = 0.6091	P = 0.5781
Individual (between rows)	26.89	1	26.89	F (1, 8) = 6.306	P = 0.0363
Residual (random)	34.11	8	4.264
Total	81.78	17
Data summary
Number of treatments (columns)	9
Number of subjects (rows)	2
Table Analyzed	Data 1
ANOVA summary
F	4.441
P value	0.012
P value summary	*
Are differences among means statistically significant? (P < 0.05)	Yes
R square	0.3388
Brown-Forsythe test
F (DFn, DFd)	2.568 (3, 26)
P value	0.0761
P value summary	ns
Significantly different standard deviations? (P < 0.05)	No
Bartlett's test
Bartlett's statistic (corrected)
P value
P value summary
Significantly different standard deviations? (P < 0.05)
ANOVA table	SS	DF	MS	F (DFn, DFd)	P value
Treatment (between columns)	127.6	3	42.54	F (3, 26) = 4.441	P = 0.0120
Residual (within columns)	249.1	26	9.579
Total	376.7	29
Data summary
Number of treatments (columns)	4
Number of values (total)	30
STAGE I vs. STAGE II	1.843	-1.961 to 5.647	No	ns
STAGE I vs. STAGE III	5	1.548 to 8.452	Yes	**
STAGE I vs. STAGE IV	2.7	-2.381 to 7.781	No	ns
STAGE II vs. STAGE III	3.157	-0.1871 to 6.501	No	ns
STAGE II vs. STAGE IV	0.8571	-3.826 to 5.540	No	ns
STAGE III vs. STAGE IV	-2.3	-6.767 to 2.167	No	ns
Table Analyzed	Data 1
Column B	Resistant
vs.	vs.
Column A	Sensitive
Unpaired t test
P value	0.2205
P value summary	ns
Significantly different? (P < 0.05)	No
One- or two-tailed P value?	Two-tailed
t, df	t=1.258 df=24
How big is the difference?
Mean ± SEM of column A	4.957 ± 0.6929 N=23
Mean ± SEM of column B	7.667 ± 2.963 N=3
Difference between means	2.710 ± 2.154
95% confidence interval	-1.736 to 7.157
R square	0.06186
F test to compare variances
F,DFn, Dfd	2.385, 2, 22
P value	0.2311
P value summary	ns
Significantly different? (P < 0.05)	No

## Sheet: TableS9_BTG2_mut relations
Correlated Gene	Cytoband	Spearman's Correlation	p-Value	q-Value
FOS	14q24.3	0.572721	2.97617e-17	5.9711e-13
JUN	1p32.1	0.55071	7.99177e-16	8.01695e-12
NR4A1	12q13.13	0.535012	7.23437e-15	4.83811e-11
EGR1	5q31.2	0.523948	3.19533e-14	1.6027e-10
ATF3	1q32.3	0.514437	1.09818e-13	4.40654e-10
FOSB	19q13.32	0.51055	1.79915e-13	6.01607e-10
RHOB	2p24.1	0.508252	2.40148e-13	6.5401e-10
DUSP1	5q35.1	0.507594	2.60782e-13	6.5401e-10
JUNB	19p13.13	0.497593	8.91891e-13	1.98822e-09
EGR3	8p21.3	0.459881	6.53397e-11	1.31091e-07
DUSP2	2q11.2	0.452339	1.45074e-10	2.64602e-07
IER2	19p13.13	0.433524	9.76574e-10	1.63275e-06
ZFP36L1	14q24.1	0.423888	2.48099e-09	3.82893e-06
ZFP36	19q13.2	0.413831	6.36546e-09	9.12216e-06
HBB	11p15.4	0.387231	6.65602e-08	8.90264e-05
SOCS3	17q25.3	0.380547	1.16294e-07	0.000142273
JUND	19p13.11	0.380111	1.20552e-07	0.000142273
CSRNP1	3p22.2	0.376064	1.67909e-07	0.000187153
BABAM2-AS1	2p23.2	0.359224	6.35715e-07	0.000671281
FMO4	1q24.3	0.345421	1.79085e-06	0.00174979
MCL1	1q21.2	0.345114	1.83151e-06	0.00174979
EGR2	10q21.3	0.337498	3.1749e-06	0.00289536
EGR4	2p13.2	0.336564	3.39316e-06	0.00295986
HBA2	16p13.3	0.329196	5.68941e-06	0.00459747
AKAP6	14q12	0.329	5.76675e-06	0.00459747
TPPP	5p15.33	0.328529	5.95794e-06	0.00459747
PNRC1	6q15	0.327281	6.49316e-06	0.0048249
NR4A3	9q31.1	0.322921	8.74307e-06	0.00622014
SPERT	13q14.13	0.322508	8.99088e-06	0.00622014
CEBPD	8q11.21	0.320025	1.0627e-05	0.00710696
FAM160A2	11p15.4	0.317387	1.26714e-05	0.00812776
LINC01622	6p25.3	0.317044	1.29636e-05	0.00812776
DUSP8	11p15.5	0.312978	1.69423e-05	0.0103004
MOBP	3p22.1	0.311511	1.86432e-05	0.0110011
MS4A8	11q12.2	0.308526	2.26115e-05	0.0129616
RASD1	17p11.2	0.305034	2.8266e-05	0.0157528
MSMO1	4q32.3	-0.304488	2.92612e-05	0.0158667
MOAP1	14q32.12	0.303376	3.13949e-05	0.0165757
DRD2	11q23.2	0.302305	3.35858e-05	0.0172777
WDR45B	17q25.3	-0.301085	3.62582e-05	0.017909
POF1B	Xq21.1	0.300935	3.65982e-05	0.017909
MND1	4q31.3	-0.300541	3.75116e-05	0.0179189
FAM71A	1q32.3	0.299547	3.99116e-05	0.018622
MIPOL1	14q13.3-q21.1	0.298519	4.25435e-05	0.0193698
RASSF6	4q13.3	0.29818	4.34451e-05	0.0193698
KIAA1211L	2q11.2	0.297784	4.45233e-05	0.019419
SPC25	2q24.3	-0.297217	4.61115e-05	0.019421
SGK1	6q23.2	0.297093	4.64639e-05	0.019421
PHF19	9q33.2	-0.296114	4.93521e-05	0.0200614
PTGS2	1q31.1	0.295903	4.99961e-05	0.0200614
PER1	17p13.1	0.295274	5.1963e-05	0.0204418
FAM110C	2p25.3	0.29489	5.31998e-05	0.0205259
CDC45	22q11.21	-0.292989	5.97376e-05	0.021849
PPP1R15A	19q13.33	0.29272	6.07205e-05	0.021849
POLE3	9q32	-0.292686	6.08453e-05	0.021849
SIK1	21q22.3	0.292648	6.09851e-05	0.021849
ARPC5L	9q33.3	-0.291773	6.43085e-05	0.0226014
KY	3q22.2	0.29151	6.53381e-05	0.0226014
AGR3	7p21.1	0.291091	6.70131e-05	0.0227879
ALAS2	Xp11.21	0.290177	7.08039e-05	0.0236756
RESF1	12p11.21	0.289348	7.44164e-05	0.0244757
IDI1	10p15.3	-0.286866	8.62953e-05	0.0279249
GJB7	6q14.3-q15	0.28655	8.79299e-05	0.0279749
ZFP36L2	2p21	0.286301	8.92385e-05	0.0279749
ACSS1	20p11.21	0.285869	9.15504e-05	0.0282491
KLF6	10p15.2	0.285616	9.29294e-05	0.0282491
CXCL2	4q13.3	0.284953	9.6638e-05	0.028938
GAS8	16q24.3	0.284648	9.8388e-05	0.0290288
ZSWIM6	5q12.1	0.284304	0.000100403	0.0291939
C20ORF194	20p13	0.282723	0.000110153	0.0315425
KLF4	9q31.2	0.282497	0.000111624	0.0315425
KCNJ9	1q23.2	0.279362	0.000133914	0.0373154
RAB14	9q33.2	-0.277829	0.000146268	0.0391038
RAD23B	9q31.2	-0.277759	0.000146854	0.0391038
MYO3B	2q31.1	0.277257	0.000151138	0.0391038
COL4A4	2q36.3	0.277206	0.000151586	0.0391038
SLC2A12	6q23.2	0.276969	0.000153655	0.0391038
RNASET2	6q27	0.276903	0.000154234	0.0391038
CCN1	1p22.3	0.276791	0.00015522	0.0391038
ANXA4	2p13.3	0.27667	0.000156301	0.0391038
ZBTB6	9q33.2	-0.276495	0.000157873	0.0391038
PLCL1	2q33.1	0.275746	0.000164757	0.0403111
NUSAP1	15q15.1	-0.274968	0.000172211	0.0416274
RAD51	15q15.1	-0.27461	0.000175748	0.0416865
KNSTRN	15q15.1	-0.274351	0.000178344	0.0416865
ELOVL5	6p12.1	-0.274277	0.000179089	0.0416865
KRTAP10-4	21q22.3	0.274113	0.000180767	0.0416865
ENY2	8q23.1	-0.273388	0.000188327	0.0429364
PHF24	9p13.3	0.273067	0.000191758	0.0432274
AVPI1	10q24.2	0.272552	0.00019741	0.0440071
ATAD2	8q24.13	-0.27167	0.000207431	0.0457329
LHCGR	2p16.3	0.271112	0.000214008	0.0465344
HBA1	16p13.3	0.270971	0.000215706	0.0465344
FLJ13224	12p11.21	0.270724	0.000218702	0.0466788
LINC01101	2q14.2	0.27045	0.00022208	0.0469009
TAS2R14	12p13.2	0.270127	0.000226106	0.0472538
ALDH3A2	17p11.2	0.269836	0.0002298	0.0475308
NSDHL	Xq28	-0.269134	0.000238954	0.0489197
CCDC140	2q36.1	-0.268671	0.000245163	0.0496839
MCM10	10p13	-0.267983	0.000254678	0.051096
CENPM	22q13.2	-0.267764	0.000257777	0.0512058
RGS2	1q31.2	0.266148	0.000281764	0.0552199
PPP1R3B	8p23.1	0.265941	0.000284982	0.0552199
ANKK1	11q23.2	0.26586	0.000286242	0.0552199
PITPNB	22q12.1	-0.265364	0.000294136	0.0562023
EPHB3	3q27.1	-0.264506	0.000308246	0.0583428
LINC00312	3p25.3	0.264269	0.000312249	0.0585481
DOLPP1	9q34.11	-0.263928	0.000318091	0.0586697
CCN2	6q23.2	0.263699	0.000322075	0.0586697
FAM153CP	5q35.3	0.263634	0.000323227	0.0586697
KIFC1	6p21.32	-0.263461	0.000326282	0.0586697
IQCN	19p13.11	0.263391	0.000327519	0.0586697
HTR5A	7q36.2	0.262136	0.000350552	0.0615171
GRASP	12q13.13	0.262065	0.000351893	0.0615171
PDCD4	10q25.2	0.262027	0.000352613	0.0615171
OR52W1	11p15.4	0.26117	0.000369295	0.0638722
KRT74	12q13.13	0.260984	0.000373003	0.0639621
SESN1	6q21	0.260574	0.00038131	0.0648325
CNGA4	11p15.4	0.260307	0.000386808	0.0649549
OR9A4	7q34	0.260081	0.000391523	0.0649549
ZNF608	5q23.2	0.259987	0.00039351	0.0649549
GADD45B	19p13.3	0.259917	0.000394981	0.0649549
TRIB1	8q24.13	0.259483	0.000404259	0.0659403
CAVIN2	2q32.3	0.259187	0.000410717	0.0663363
BAZ2B	2q24.2	0.259069	0.0004133	0.0663363
GP9	3q21.3	0.258438	0.000427452	0.0680633
SWAP70	11p15.4	0.257901	0.000439833	0.0694833
NCAPG	4p15.31	-0.257489	0.00044956	0.0704651
NR4A2	2q24.1	0.256933	0.000462985	0.0718453
CAPN9	1q42.2	0.25683	0.000465528	0.0718453
MAP3K21	1q42.2	0.256283	0.000479192	0.0727736
ETS2	21q22.2	0.256263	0.000479696	0.0727736
DNM1	9q34.11	-0.256155	0.000482425	0.0727736
HBG2	11p15.4	0.25554	0.000498315	0.0746096
GPM6A	4q34.2	0.255385	0.000502406	0.074665
DNAH6	2p11.2	0.254839	0.000517013	0.0762708
ADAMDEC1	8p21.2	-0.254264	0.000532844	0.077961
KCNJ12	17p11.2	0.254143	0.000536242	0.077961
PLK1	16p12.2	-0.2538	0.000545932	0.0787898
AVPR2	Xq28	0.253609	0.00055141	0.0787898
UST	6q25.1	0.25347	0.000555437	0.0787898
FRY	13q13.1	0.253285	0.000560829	0.0787898
CCNA2	4q27	-0.253217	0.000562812	0.0787898
TGFBR3	1p22.1	0.253125	0.000565505	0.0787898
SURF4	9q34.2	-0.252855	0.000573538	0.079358
DUSP5	10q25.2	0.252556	0.000582521	0.0798132
FAM49B	8q24.21	-0.252379	0.000587911	0.0798132
NCAPG2	7q36.3	-0.252351	0.000588763	0.0798132
PRKCE	2p21	0.251754	0.0006073	0.0817735
DUSP19	2q32.1	0.25048	0.000648653	0.0867595
SCGB1D2	11q12.3	0.249974	0.000665779	0.0881399
CDCA5	11q13.1	-0.249917	0.00066776	0.0881399
IL1A	2q14.1	0.248856	0.000705154	0.0921981
ANK3	10q21.2	0.248625	0.000713544	0.0921981
ETV4	17q21.31	-0.248376	0.000722688	0.0921981
FAM72D	1q21.1	-0.248374	0.000722761	0.0921981
LAMA2	6q22.33	0.248372	0.000722835	0.0921981
FETUB	3q27.3	0.248026	0.00073574	0.0921981
SMC2	9q31.1	-0.248018	0.000736044	0.0921981
SYNJ2BP	14q24.2	0.247944	0.000738818	0.0921981
SOX6	11p15.2	0.2479	0.000740467	0.0921981
RANBP1	22q11.21	-0.247771	0.000745377	0.0921981
MGAM	7q34	0.247485	0.000756317	0.0921981
COL4A5	Xq22.3	0.247341	0.000761895	0.0921981
RECQL4	8q24.3	-0.247327	0.000762436	0.0921981
CLEC2L	7q34	-0.247316	0.000762842	0.0921981
ZNF559	19p13.2	0.246887	0.000779697	0.093671
FAM153A	5q35.3	0.24658	0.000791963	0.0945783
PPP1R15B	1q32.1	0.246031	0.000814315	0.0966722
MINDY1	1q21.3	0.245561	0.00083391	0.0984161
CDK1	10q21.2	-0.245336	0.000843445	0.0988103
CTNNAL1	9q31.3	-0.245251	0.0008471	0.0988103
PERP	6q23.3	0.244855	0.000864204	0.0992858
CCDC146	7q11.23	0.244751	0.000868726	0.0992858
GSTM3	1p13.3	0.244739	0.000869249	0.0992858
CCDC122	13q14.11	0.2446	0.000875373	0.0992858
GPHA2	11q13.1	0.244493	0.000880085	0.0992858
IL6	7p15.3	0.244476	0.000880869	0.0992858
CKMT2	5q14.1	0.243921	0.000905778	0.0993273
NEIL3	4q34.3	-0.243911	0.000906231	0.0993273
ARRDC3	5q14.3	0.243814	0.000910681	0.0993273
OIP5	15q15.1	-0.2437	0.000915883	0.0993273
SUV39H1	Xp11.23	-0.243612	0.000919917	0.0993273
OSM	22q12.2	0.243525	0.000923968	0.0993273
PDE4DIP	1q21.2	0.243515	0.000924429	0.0993273
UBE2L3	22q11.21	-0.243495	0.000925352	0.0993273
POP1	8q22.2	-0.243326	0.000933234	0.0993273
POU5F1B	8q24.21	0.243215	0.000938408	0.0993273
FABP6	5q33.3	0.243169	0.000940609	0.0993273
BUB1B	15q15.1	-0.243107	0.000943526	0.0993273
ZNF846	19p13.2	0.243063	0.000945597	0.0993273
NUDCD1	8q23.1	-0.242422	0.000976388	0.102027
PYGL	14q22.1	0.242201	0.000987214	0.102624
MROH7	1p32.3	0.241793	0.0010075	0.103981
GPR107	9q34.11	-0.241636	0.00101542	0.103981
PPM1H	12q14.1-q14.2	0.241628	0.00101582	0.103981
ARL15	5q11.2	0.241383	0.00102827	0.103986
RGL3	19p13.2	0.241212	0.00103705	0.103986
KIF4A	Xq13.1	-0.241178	0.0010388	0.103986
SFTPD	10q22.3	0.24114	0.00104075	0.103986
REC8	14q12	0.24112	0.00104178	0.103986
ZCCHC13	Xq13.2	0.240856	0.00105555	0.104839
FBXW2	9q33.2	-0.240105	0.00109553	0.107327
UBE2C	20q13.12	-0.240043	0.00109888	0.107327
SLC9C2	1q25.1	0.24	0.00110124	0.107327
PLEKHG3	14q23.3	0.239898	0.0011068	0.107327
C4ORF46	4q32.1	-0.239888	0.00110735	0.107327
CHN1	2q31.1	-0.239416	0.00113344	0.108595
KIF2C	1p34.1	-0.239373	0.00113589	0.108595
DSCC1	8q24.12	-0.239359	0.00113667	0.108595
MMP24	20q11.22	0.239211	0.00114495	0.108868
PRB4	12p13.2	0.238877	0.00116398	0.109707
MAD2L1	4q27	-0.238765	0.00117036	0.109707
ODF3L1	15q24.2	0.238747	0.00117144	0.109707
RP1	8q11.23-q12.1	0.238674	0.00117564	0.109707
C1ORF87	1p32.1	0.238274	0.00119896	0.111286
DPM2	9q34.11	-0.23811	0.00120862	0.111286
RHEX	1q32.1	0.238101	0.00120921	0.111286
OPRL1	20q13.33	0.23783	0.00122537	0.112258
NUDT16P1	3q22.1	0.237673	0.00123484	0.112534
PARVA	11p15.3	0.237565	0.00124136	0.112534
KLF2	19p13.11	0.237438	0.00124912	0.112534
GP6	19q13.42	0.23741	0.00125081	0.112534
FRMPD1	9p13.2	0.237197	0.00126392	0.113036
BAK1	6p21.31	-0.237093	0.00127032	0.113036
RGS16	1q25.3	0.237046	0.00127329	0.113036
TNNT2	1q32.1	0.236462	0.00131002	0.115784
CKS1B	1q21.3	-0.23613	0.00133141	0.116247
KRTAP5-AS1	11p15.5	0.236118	0.00133218	0.116247
KRTAP5-9	11q13.4	0.236111	0.00133266	0.116247
LINC00473	6q27	0.236022	0.00133844	0.116247
SPIRE2	16q24.3	0.235728	0.00135769	0.116921
EDN1	6p24.1	0.235658	0.00136229	0.116921
ZNF678	1q42.13	0.235455	0.00137578	0.116921
REXO4	9q34.2	-0.235421	0.00137805	0.116921
SENP5	3q29	-0.235328	0.00138431	0.116921
IGSF11	3q13.32	0.235328	0.00138431	0.116921
PSMB7	9q33.3	-0.235288	0.00138699	0.116921
POLR3GL	1q21.1	0.235005	0.00140611	0.117952
CHRAC1	8q24.3	-0.23493	0.00141127	0.117952
MRPL14	6p21.1	-0.234788	0.00142096	0.117952
TOR2A	9q34.11	-0.234762	0.00142274	0.117952
FBLN5	14q32.12	0.234392	0.00144843	0.119588
MYO15A	17p11.2	0.234279	0.00145639	0.119752
SWI5	9q34.11	-0.233855	0.00148648	0.121156
SIAH3	13q14.13	0.233774	0.00149226	0.121156
ORC1	1p32.3	-0.233636	0.00150225	0.121156
LAMB3	1q32.2	0.233618	0.00150354	0.121156
FAM66A	8p23.1	0.233616	0.00150366	0.121156
MTURN	7p14.3	0.23346	0.00151497	0.121579
DCAF12L1	Xq25	0.233237	0.00153135	0.121856
MYBL2	20q13.12	-0.233052	0.00154498	0.121856
THAP7	22q11.21	-0.232861	0.00155922	0.121856
EBP	Xp11.23	-0.232726	0.00156938	0.121856
DCAF12L2	Xq25	0.232675	0.00157319	0.121856
IL17RE	3p25.3	0.232648	0.00157524	0.121856
GDF15	19p13.11	0.232642	0.00157569	0.121856
ARID4A	14q23.1	0.232616	0.00157764	0.121856
DEPP1	10q11.21	0.232601	0.00157885	0.121856
ARRDC4	15q26.2	0.232597	0.00157915	0.121856
C2CD4B	15q22.2	0.232445	0.00159064	0.122272
KRTAP5-1	11p15.5	0.232312	0.00160082	0.122585
SERPINA7	Xq22.3	0.232205	0.00160902	0.122744
OR7E91P	2p13.3	0.231615	0.00165511	0.125782
CAPN13	2p23.1	0.231275	0.00168216	0.127356
FAM225B	9q32	-0.23093	0.00170999	0.12864
XKR6	8p23.1	0.230859	0.00171584	0.12864
UACA	15q23	0.230727	0.0017266	0.12864
PPP1R36	14q23.3	0.230708	0.00172822	0.12864
LINC02347	12q24.32	0.230672	0.00173119	0.12864
MTR	1q43	0.230463	0.00174847	0.129445
ALPP	2q37.1	0.229972	0.00178967	0.132008
BIRC5	17q25.3	-0.229818	0.0018028	0.132405
IFT172	2p23.3	0.229754	0.00180825	0.132405
SVOPL	7q34	0.229406	0.00183832	0.134035
RAD21	8q24.11	-0.229342	0.00184387	0.134035
EZH2	7q36.1	-0.229161	0.00185973	0.134699
YIPF6	Xq12-q13.1	-0.228763	0.00189502	0.135906
RAD54L	1p34.1	-0.228759	0.00189537	0.135906
RASAL1	12q24.13	0.228657	0.00190447	0.135906
FAM41C	1p36.33	0.228598	0.00190984	0.135906
ACIN1	14q11.2	0.22856	0.00191325	0.135906
VPS13C	15q22.2	0.228385	0.00192911	0.135906
SCD	10q24.31	-0.228385	0.00192911	0.135906
LOC728989	1q21.1	0.228368	0.00193058	0.135906
TMEM203	9q34.3	-0.228235	0.00194272	0.136282
TCP10	6q27	0.227958	0.00196823	0.137591
KRT86	12q13.13	0.227853	0.00197796	0.137674
POU5F1	6p21.33	0.227797	0.00198314	0.137674
FAM225A	9q32	-0.227557	0.00200568	0.138759
ANK2	4q25-q26	0.227411	0.00201943	0.138908
ZMYND8	20q13.12	0.227387	0.00202169	0.138908
CCDC117	22q12.1	-0.227146	0.00204465	0.139474
KIAA1107	1p22.1	0.227146	0.00204465	0.139474
ATP13A4	3q29	0.227082	0.00205078	0.139474
CDKN3	14q22.2	-0.226894	0.002069	0.140221
MAP1LC3C	1q43	0.226824	0.00207575	0.140221
DNAJC9	10q22.2	-0.226649	0.00209284	0.140901
LINC00598	13q14.11	0.226542	0.00210326	0.14113
FAM214A	15q21.2-q21.3	0.226428	0.00211456	0.141415
GPD1L	3p22.3	0.226219	0.0021353	0.142327
PTK2	8q24.3	-0.226099	0.00214723	0.142649
PTX4	16p13.3	-0.225923	0.002165	0.143354
APH1B	15q22.2	0.225825	0.00217491	0.143537
ATL1	14q22.1	0.225687	0.00218887	0.143985
ARC	8q24.3	0.225514	0.00220659	0.144676
EGOT	3p26.1	0.225251	0.00223379	0.145773
ZNF18	17p12	0.225212	0.00223786	0.145773
GCC2	2q12.3	0.22509	0.00225052	0.146124
CYP17A1	10q24.32	0.224848	0.00227592	0.146979
PSMD8	19q13.2	-0.224825	0.00227835	0.146979
MBNL2	13q32.1	0.224686	0.00229313	0.147041
CYB561D2	3p21.31	-0.224678	0.00229397	0.147041
MRPL13	8q24.12	-0.224537	0.00230905	0.147353
ATXN7L1	7q22.3	0.224495	0.00231353	0.147353
SGK3	8q13.1	0.224206	0.00234466	0.148864
URM1	9q34.11	-0.224065	0.00236004	0.149367
OR2L13	1q44	0.223835	0.00238531	0.150492
COL4A6	Xq22.3	0.223717	0.00239834	0.150742
ALG2	9q22.33	-0.223663	0.0024043	0.150742
SRRM4	12q24.23	0.223562	0.00241556	0.150976
SYDE2	1p22.3	0.223408	0.00243274	0.151578
FAM162B	6q22.1	0.223316	0.00244303	0.151748
CDH22	20q13.12	0.223189	0.00245739	0.152169
NFKBIZ	3q12.3	0.223062	0.00247188	0.152595
FOXN1	17q11.2	0.222875	0.00249321	0.153127
C10ORF53	10q11.23	0.222853	0.00249577	0.153127
DNAH5	5p15.2	0.22253	0.00253306	0.154162
FST	5q11.2	0.222424	0.00254547	0.154162
NTMT1	9q34.11	-0.222399	0.00254839	0.154162
BEST4	1p34.1	0.222395	0.00254886	0.154162
TM4SF19	3q29	-0.222376	0.00255106	0.154162
PFN1P2	1p11.2	0.222178	0.00257437	0.155104
UBL4A	Xq28	-0.221806	0.00261868	0.157301
TRAPPC12	2p25.3	0.22169	0.00263256	0.157663
WARS2	1p12	0.221413	0.0026661	0.15907
KRTAP5-5	11p15.5	0.221366	0.00267191	0.15907
GAS8-AS1	16q24.3	0.22129	0.00268115	0.159148
RBM18	9q33.2	-0.221147	0.0026988	0.159513
GATA3-AS1	10p14	-0.221111	0.0027032	0.159513
SLC10A1	14q24.1	0.220823	0.00273896	0.16055
SAMD13	1p31.1	0.220816	0.00273981	0.16055
NDC80	18p11.32	-0.220777	0.00274479	0.16055
NEAT1	11q13.1	0.22049	0.00278088	0.161452
SLC35A2	Xp11.23	-0.220438	0.00278745	0.161452
NPAS3	14q13.1	0.220438	0.00278745	0.161452
PTGES2	9q34.11	-0.220388	0.00279377	0.161452
TRIM68	11p15.4	0.220309	0.00280391	0.161452
MMP8	11q22.2	-0.220273	0.0028085	0.161452
HIRA	22q11.21	-0.220199	0.00281792	0.161531
RASSF10	11p15.3	0.220122	0.00282789	0.161641
WDR76	15q15.3	-0.219966	0.00284792	0.162323
IRX2	5p15.33	0.219606	0.00289494	0.163445
PSMD5	9q33.2	-0.219437	0.0029172	0.163445
RHEBL1	12q13.12	-0.219431	0.00291799	0.163445
ALDH3A1	17p11.2	0.219418	0.00291969	0.163445
IQCH	15q23	0.219415	0.0029201	0.163445
ZNF556	19p13.3	0.219383	0.0029243	0.163445
RGMB	5q15	0.219361	0.00292722	0.163445
TCTEX1D4	1p34.1	0.219319	0.00293277	0.163445
ARHGEF39	9p13.3	-0.219212	0.00294709	0.163788
MELK	9p13.2	-0.219045	0.00296949	0.164577
ACKR3	2q37.3	0.218961	0.00298074	0.164604
UBQLN1	9q21.32|9q21.2-q21.3	-0.218919	0.00298639	0.164604
ADAMTS8	11q24.3	0.218842	0.00299689	0.164731
USP43	17p13.1	0.218579	0.0030327	0.16611
DGCR6L	22q11.21	-0.218432	0.00305294	0.16611
AGT	1q42.2	0.21842	0.00305457	0.16611
PCP2	19p13.2	0.218416	0.00305511	0.16611
PRKN	6q26	0.218199	0.00308519	0.166991
CDC6	17q21.2	-0.218179	0.00308796	0.166991
B4GALT2	1p34.1	-0.218012	0.00311133	0.167443
TMCC3	12q22	0.218	0.003113	0.167443
EPB41L4A	5q22.1-q22.2	0.217938	0.00312167	0.16746
PCLAF	15q22.31	-0.217753	0.0031478	0.168412
DBF4	7q21.12	-0.217677	0.00315854	0.168537
RAP2C	Xq26.2	-0.21755	0.00317669	0.168734
TOMM6	6p21.1	-0.217528	0.00317982	0.168734
ANXA6	5q33.1	0.21743	0.0031938	0.168734
TLR9	3p21.2	0.2174	0.00319809	0.168734
CENPU	4q35.1	-0.217317	0.00321012	0.168734
SUMO1	2q33.1	-0.217299	0.00321271	0.168734
SMPD3	16q22.1	0.217102	0.00324127	0.16979

## Sheet: TableS10_btg2_gokegg
##Databases: KEGG PATHWAY, Gene Ontology
##Statistical test method: hypergeometric test / Fisher's exact test
##FDR correction method: Benjamini and Hochberg
#Term	Database	ID	Input number	Background number	P-Value	Corrected P-Value	Input	Hyperlink
Human T-cell leukemia virus 1 infection	KEGG PATHWAY	hsa05166	11	219	9.67362e-10	4.54213e-07	ETS2|CCNA2|CCN1|BUB1B|EGR2|EGR1|JUN|IL6|ZFP36|RANBP1|FOS	http://www.genome.jp/kegg-bin/show_pathway?hsa05166/hsa:3569%09red/hsa:5902%09red/hsa:2353%09red/hsa:2114%09red/hsa:7538%09red/hsa:890%09red/hsa:701%09red/hsa:3725%09red/hsa:1959%09red/hsa:1958%09red
IL-17 signaling pathway	KEGG PATHWAY	hsa04657	7	93	8.64901e-08	1.55769e-05	PTGS2|CXCL2|FOS|FOSB|JUN|JUND|IL6	http://www.genome.jp/kegg-bin/show_pathway?hsa04657/hsa:3569%09red/hsa:2920%09red/hsa:5743%09red/hsa:3725%09red/hsa:3727%09red/hsa:2353%09red/hsa:2354%09red
AGE-RAGE signaling pathway in diabetic complications	KEGG PATHWAY	hsa04933	7	100	1.37921e-07	2.06996e-05	PRKCE|EGR1|JUN|IL6|COL4A5|COL4A4|IL1A	http://www.genome.jp/kegg-bin/show_pathway?hsa04933/hsa:1287%09red/hsa:1286%09red/hsa:3552%09red/hsa:5581%09red/hsa:3569%09red/hsa:3725%09red/hsa:1958%09red
Cellular senescence	KEGG PATHWAY	hsa04218	8	160	2.02928e-07	2.81133e-05	CCNA2|CCN1|GADD45B|ZFP36L1|ZFP36L2|IL6|CDK1|IL1A	http://www.genome.jp/kegg-bin/show_pathway?hsa04218/hsa:3569%09red/hsa:678%09red/hsa:3552%09red/hsa:890%09red/hsa:677%09red/hsa:983%09red/hsa:4616%09red
Cell cycle	KEGG PATHWAY	hsa04110	7	124	5.4872e-07	7.05889e-05	CCNA2|CCN1|BUB1B|PLK1|GADD45B|CDK1|CDC45	http://www.genome.jp/kegg-bin/show_pathway?hsa04110/hsa:983%09red/hsa:890%09red/hsa:701%09red/hsa:5347%09red/hsa:4616%09red/hsa:8318%09red
Salmonella infection	KEGG PATHWAY	hsa05132	6	83	9.27996e-07	0.000103339	CXCL2|FOS|ARPC5L|JUN|IL6|IL1A	http://www.genome.jp/kegg-bin/show_pathway?hsa05132/hsa:3569%09red/hsa:3552%09red/hsa:81873%09red/hsa:2920%09red/hsa:3725%09red/hsa:2353%09red
MAPK signaling pathway	KEGG PATHWAY	hsa04010	9	295	1.88245e-06	0.000169515	FOS|GADD45B|NR4A1|JUN|JUND|DUSP8|DUSP5|IL1A|DUSP2	http://www.genome.jp/kegg-bin/show_pathway?hsa04010/hsa:3552%09red/hsa:3727%09red/hsa:3725%09red/hsa:1844%09red/hsa:1847%09red/hsa:3164%09red/hsa:4616%09red/hsa:1850%09red/hsa:2353%09red
Hepatitis B	KEGG PATHWAY	hsa05161	7	163	3.13753e-06	0.000245682	CCNA2|CCN1|FOS|EGR2|EGR3|JUN|IL6	http://www.genome.jp/kegg-bin/show_pathway?hsa05161/hsa:3569%09red/hsa:890%09red/hsa:3725%09red/hsa:1960%09red/hsa:1959%09red/hsa:2353%09red
TNF signaling pathway	KEGG PATHWAY	hsa04668	6	112	4.82483e-06	0.000362063	PTGS2|CXCL2|SOCS3|FOS|JUN|IL6	http://www.genome.jp/kegg-bin/show_pathway?hsa04668/hsa:3569%09red/hsa:2920%09red/hsa:5743%09red/hsa:3725%09red/hsa:2353%09red/hsa:9021%09red
Osteoclast differentiation	KEGG PATHWAY	hsa04380	6	128	1.00194e-05	0.000563906	SOCS3|FOS|FOSB|JUN|JUND|IL1A	http://www.genome.jp/kegg-bin/show_pathway?hsa04380/hsa:3552%09red/hsa:3727%09red/hsa:3725%09red/hsa:2353%09red/hsa:2354%09red/hsa:9021%09red
Viral carcinogenesis	KEGG PATHWAY	hsa05203	7	201	1.1745e-05	0.000640993	CCNA2|CCN1|EGR2|EGR3|JUN|CDK1|RANBP1	http://www.genome.jp/kegg-bin/show_pathway?hsa05203/hsa:5902%09red/hsa:983%09red/hsa:890%09red/hsa:3725%09red/hsa:1960%09red/hsa:1959%09red
African trypanosomiasis	KEGG PATHWAY	hsa05143	4	37	1.50059e-05	0.000750713	IL6|HBA1|HBA2|HBB	http://www.genome.jp/kegg-bin/show_pathway?hsa05143/hsa:3043%09red/hsa:3569%09red/hsa:3040%09red/hsa:3039%09red
Oxytocin signaling pathway	KEGG PATHWAY	hsa04921	6	153	2.64257e-05	0.00118399	KCNJ12|PTGS2|KCNJ9|FOS|JUN|RGS2	http://www.genome.jp/kegg-bin/show_pathway?hsa04921/hsa:5743%09red/hsa:3725%09red/hsa:3768%09red/hsa:2353%09red/hsa:5997%09red/hsa:3765%09red
Small cell lung cancer	KEGG PATHWAY	hsa05222	5	93	3.01028e-05	0.00122697	COL4A5|PTGS2|GADD45B|COL4A4|LAMA2	http://www.genome.jp/kegg-bin/show_pathway?hsa05222/hsa:1287%09red/hsa:1286%09red/hsa:4616%09red/hsa:3908%09red/hsa:5743%09red
Pathways in cancer	KEGG PATHWAY	hsa05200	10	530	3.06573e-05	0.00122697	PTGS2|LAMA2|FOS|GADD45B|GSTM3|JUN|IL6|COL4A5|COL4A4|RAD51	http://www.genome.jp/kegg-bin/show_pathway?hsa05200/hsa:1287%09red/hsa:1286%09red/hsa:2947%09red/hsa:3569%09red/hsa:5743%09red/hsa:3725%09red/hsa:4616%09red/hsa:5888%09red/hsa:2353%09red/hsa:3908%09red
Malaria	KEGG PATHWAY	hsa05144	4	49	4.19457e-05	0.00164226	IL6|HBA1|HBA2|HBB	http://www.genome.jp/kegg-bin/show_pathway?hsa05144/hsa:3043%09red/hsa:3569%09red/hsa:3040%09red/hsa:3039%09red
C-type lectin receptor signaling pathway	KEGG PATHWAY	hsa04625	5	104	5.01511e-05	0.00188305	IL6|PTGS2|EGR2|JUN|EGR3	http://www.genome.jp/kegg-bin/show_pathway?hsa04625/hsa:5743%09red/hsa:1959%09red/hsa:3725%09red/hsa:1960%09red/hsa:3569%09red
Insulin resistance	KEGG PATHWAY	hsa04931	5	108	5.9556e-05	0.00210315	IL6|PRKCE|PYGL|PPP1R3B|SOCS3	http://www.genome.jp/kegg-bin/show_pathway?hsa04931/hsa:3569%09red/hsa:79660%09red/hsa:5836%09red/hsa:9021%09red/hsa:5581%09red
Kaposi sarcoma-associated herpesvirus infection	KEGG PATHWAY	hsa05167	6	186	7.54968e-05	0.00247218	PTGS2|CXCL2|FOS|JUN|IL6|ZFP36	http://www.genome.jp/kegg-bin/show_pathway?hsa05167/hsa:3569%09red/hsa:7538%09red/hsa:2920%09red/hsa:5743%09red/hsa:3725%09red/hsa:2353%09red
p53 signaling pathway	KEGG PATHWAY	hsa04115	4	72	0.000172254	0.0050037	CDK1|GADD45B|PERP|SESN1	http://www.genome.jp/kegg-bin/show_pathway?hsa04115/hsa:27244%09red/hsa:64065%09red/hsa:983%09red/hsa:4616%09red
Leishmaniasis	KEGG PATHWAY	hsa05140	4	74	0.00019044	0.00544416	IL1A|JUN|PTGS2|FOS	http://www.genome.jp/kegg-bin/show_pathway?hsa05140/hsa:3725%09red/hsa:5743%09red/hsa:3552%09red/hsa:2353%09red
Pertussis	KEGG PATHWAY	hsa05133	4	76	0.00020997	0.0059087	IL6|IL1A|JUN|FOS	http://www.genome.jp/kegg-bin/show_pathway?hsa05133/hsa:3725%09red/hsa:3569%09red/hsa:3552%09red/hsa:2353%09red
ECM-receptor interaction	KEGG PATHWAY	hsa04512	4	86	0.000329828	0.00836649	COL4A5|LAMA2|COL4A4|GP9	http://www.genome.jp/kegg-bin/show_pathway?hsa04512/hsa:1287%09red/hsa:1286%09red/hsa:2815%09red/hsa:3908%09red
Prion diseases	KEGG PATHWAY	hsa05020	3	35	0.000355677	0.00847306	IL6|IL1A|EGR1	http://www.genome.jp/kegg-bin/show_pathway?hsa05020/hsa:3569%09red/hsa:3552%09red/hsa:1958%09red
PI3K-Akt signaling pathway	KEGG PATHWAY	hsa04151	7	354	0.000366473	0.00857167	LAMA2|SGK1|NR4A1|IL6|COL4A5|COL4A4|MCL1	http://www.genome.jp/kegg-bin/show_pathway?hsa04151/hsa:1287%09red/hsa:1286%09red/hsa:4170%09red/hsa:3569%09red/hsa:3164%09red/hsa:6446%09red/hsa:3908%09red
Rheumatoid arthritis	KEGG PATHWAY	hsa05323	4	91	0.00040521	0.00923776	IL6|IL1A|JUN|FOS	http://www.genome.jp/kegg-bin/show_pathway?hsa05323/hsa:3725%09red/hsa:3569%09red/hsa:3552%09red/hsa:2353%09red
Amoebiasis	KEGG PATHWAY	hsa05146	4	95	0.000473792	0.0104061	IL6|LAMA2|COL4A4|COL4A5	http://www.genome.jp/kegg-bin/show_pathway?hsa05146/hsa:1287%09red/hsa:1286%09red/hsa:3908%09red/hsa:3569%09red
Circadian entrainment	KEGG PATHWAY	hsa04713	4	97	0.000511011	0.0108274	PER1|KCNJ9|RASD1|FOS	http://www.genome.jp/kegg-bin/show_pathway?hsa04713/hsa:51655%09red/hsa:2353%09red/hsa:3765%09red/hsa:5187%09red
Progesterone-mediated oocyte maturation	KEGG PATHWAY	hsa04914	4	99	0.000550263	0.0112616	PLK1|CDK1|CCNA2|CCN1	http://www.genome.jp/kegg-bin/show_pathway?hsa04914/hsa:5347%09red/hsa:983%09red/hsa:890%09red
Parathyroid hormone synthesis, secretion and action	KEGG PATHWAY	hsa04928	4	106	0.000704559	0.0130816	NR4A2|EGR1|JUND|FOS	http://www.genome.jp/kegg-bin/show_pathway?hsa04928/hsa:3727%09red/hsa:1958%09red/hsa:4929%09red/hsa:2353%09red
Cocaine addiction	KEGG PATHWAY	hsa05030	3	49	0.000897822	0.0156988	DRD2|FOSB|JUN	http://www.genome.jp/kegg-bin/show_pathway?hsa05030/hsa:1813%09red/hsa:3725%09red/hsa:2354%09red
Epstein-Barr virus infection	KEGG PATHWAY	hsa05169	5	201	0.000953423	0.0165107	IL6|JUN|GADD45B|CCNA2|CCN1	http://www.genome.jp/kegg-bin/show_pathway?hsa05169/hsa:3569%09red/hsa:3725%09red/hsa:4616%09red/hsa:890%09red
Human papillomavirus infection	KEGG PATHWAY	hsa05165	6	330	0.00146374	0.0219919	PTGS2|LAMA2|CCNA2|CCN1|COL4A5|COL4A4	http://www.genome.jp/kegg-bin/show_pathway?hsa05165/hsa:1287%09red/hsa:1286%09red/hsa:3908%09red/hsa:890%09red/hsa:5743%09red
Relaxin signaling pathway	KEGG PATHWAY	hsa04926	4	130	0.00146531	0.0219919	COL4A5|COL4A4|JUN|FOS	http://www.genome.jp/kegg-bin/show_pathway?hsa04926/hsa:3725%09red/hsa:1286%09red/hsa:2353%09red/hsa:1287%09red
FoxO signaling pathway	KEGG PATHWAY	hsa04068	4	132	0.00154715	0.0226537	PLK1|IL6|GADD45B|SGK1	http://www.genome.jp/kegg-bin/show_pathway?hsa04068/hsa:5347%09red/hsa:4616%09red/hsa:6446%09red/hsa:3569%09red
Apoptosis	KEGG PATHWAY	hsa04210	4	136	0.00172026	0.0245887	GADD45B|JUN|MCL1|FOS	http://www.genome.jp/kegg-bin/show_pathway?hsa04210/hsa:3725%09red/hsa:2353%09red/hsa:4616%09red/hsa:4170%09red
Measles	KEGG PATHWAY	hsa05162	4	138	0.00181166	0.0256551	IL6|IL1A|JUN|FOS	http://www.genome.jp/kegg-bin/show_pathway?hsa05162/hsa:3725%09red/hsa:3569%09red/hsa:3552%09red/hsa:2353%09red
Fluid shear stress and atherosclerosis	KEGG PATHWAY	hsa05418	4	139	0.0018586	0.0258187	IL1A|GSTM3|JUN|FOS	http://www.genome.jp/kegg-bin/show_pathway?hsa05418/hsa:3725%09red/hsa:3552%09red/hsa:2353%09red/hsa:2947%09red
Inflammatory bowel disease (IBD)	KEGG PATHWAY	hsa05321	3	65	0.00195163	0.0262305	IL6|IL1A|JUN	http://www.genome.jp/kegg-bin/show_pathway?hsa05321/hsa:3725%09red/hsa:3569%09red/hsa:3552%09red
Amphetamine addiction	KEGG PATHWAY	hsa05031	3	68	0.00220819	0.0276177	FOSB|JUN|FOS	http://www.genome.jp/kegg-bin/show_pathway?hsa05031/hsa:3725%09red/hsa:2353%09red/hsa:2354%09red
Non-alcoholic fatty liver disease (NAFLD)	KEGG PATHWAY	hsa04932	4	149	0.00237521	0.0285094	IL6|IL1A|JUN|SOCS3	http://www.genome.jp/kegg-bin/show_pathway?hsa04932/hsa:3725%09red/hsa:3569%09red/hsa:3552%09red/hsa:9021%09red
Prolactin signaling pathway	KEGG PATHWAY	hsa04917	3	70	0.0023903	0.0285094	LHCGR|SOCS3|FOS	http://www.genome.jp/kegg-bin/show_pathway?hsa04917/hsa:2353%09red/hsa:3973%09red/hsa:9021%09red
Steroid biosynthesis	KEGG PATHWAY	hsa00100	2	19	0.00260007	0.030606	MSMO1|NSDHL	http://www.genome.jp/kegg-bin/show_pathway?hsa00100/hsa:6307%09red/hsa:50814%09red
Colorectal cancer	KEGG PATHWAY	hsa05210	3	86	0.00418428	0.0429966	GADD45B|JUN|FOS	http://www.genome.jp/kegg-bin/show_pathway?hsa05210/hsa:3725%09red/hsa:2353%09red/hsa:4616%09red
NOD-like receptor signaling pathway	KEGG PATHWAY	hsa04621	4	178	0.00441494	0.0444207	IL6|POP1|CXCL2|JUN	http://www.genome.jp/kegg-bin/show_pathway?hsa04621/hsa:3569%09red/hsa:3725%09red/hsa:260434%09red/hsa:2920%09red
MicroRNAs in cancer	KEGG PATHWAY	hsa05206	5	299	0.00511161	0.0494639	PTGS2|PDCD4|PRKCE|MCL1|CDCA5	http://www.genome.jp/kegg-bin/show_pathway?hsa05206/hsa:5743%09red/hsa:5581%09red/hsa:27250%09red/hsa:4170%09red/hsa:113130%09red
Transcriptional misregulation in cancer	KEGG PATHWAY	hsa05202	4	186	0.00513589	0.0494639	IL6|NR4A3|GADD45B|ETV4	http://www.genome.jp/kegg-bin/show_pathway?hsa05202/hsa:3569%09red/hsa:2118%09red/hsa:4616%09red/hsa:8013%09red
Hematopoietic cell lineage	KEGG PATHWAY	hsa04640	3	97	0.00578805	0.0537334	IL6|IL1A|GP9	http://www.genome.jp/kegg-bin/show_pathway?hsa04640/hsa:3569%09red/hsa:2815%09red/hsa:3552%09red
Aldosterone synthesis and secretion	KEGG PATHWAY	hsa04925	3	98	0.00594959	0.0545853	NR4A2|NR4A1|PRKCE	http://www.genome.jp/kegg-bin/show_pathway?hsa04925/hsa:3164%09red/hsa:4929%09red/hsa:5581%09red
NF-kappa B signaling pathway	KEGG PATHWAY	hsa04064	3	100	0.00628072	0.0565579	PTGS2|GADD45B|CXCL2	http://www.genome.jp/kegg-bin/show_pathway?hsa04064/hsa:5743%09red/hsa:4616%09red/hsa:2920%09red
Focal adhesion	KEGG PATHWAY	hsa04510	4	199	0.0064687	0.0573898	LAMA2|COL4A4|JUN|COL4A5	http://www.genome.jp/kegg-bin/show_pathway?hsa04510/hsa:1287%09red/hsa:1286%09red/hsa:3725%09red/hsa:3908%09red
Metabolic pathways	KEGG PATHWAY	hsa01100	12	1433	0.00658507	0.0581358	MSMO1|PTGS2|NSDHL|ALDH3A2|IDI1|ACSS1|GSTM3|CKMT2|ALAS2|ELOVL5|PYGL|MGAM	http://www.genome.jp/kegg-bin/show_pathway?hsa01100/hsa:224%09red/hsa:5836%09red/hsa:2947%09red/hsa:8972%09red/hsa:5743%09red/hsa:3422%09red/hsa:1160%09red/hsa:60481%09red/hsa:84532%09red/hsa:212%09red/hsa:6307%09red/hsa:50814%09red
Chagas disease (American trypanosomiasis)	KEGG PATHWAY	hsa05142	3	103	0.00679767	0.059143	IL6|JUN|FOS	http://www.genome.jp/kegg-bin/show_pathway?hsa05142/hsa:3725%09red/hsa:3569%09red/hsa:2353%09red
Toll-like receptor signaling pathway	KEGG PATHWAY	hsa04620	3	104	0.00697544	0.0603979	IL6|JUN|FOS	http://www.genome.jp/kegg-bin/show_pathway?hsa04620/hsa:3725%09red/hsa:3569%09red/hsa:2353%09red
Base excision repair	KEGG PATHWAY	hsa03410	2	33	0.00712672	0.0613708	POLE3|NEIL3	http://www.genome.jp/kegg-bin/show_pathway?hsa03410/hsa:54107%09red/hsa:55247%09red
Th17 cell differentiation	KEGG PATHWAY	hsa04659	3	107	0.00752522	0.0639536	IL6|JUN|FOS	http://www.genome.jp/kegg-bin/show_pathway?hsa04659/hsa:3725%09red/hsa:3569%09red/hsa:2353%09red
cAMP signaling pathway	KEGG PATHWAY	hsa04024	4	214	0.00827022	0.0693914	JUN|CNGA4|DRD2|FOS	http://www.genome.jp/kegg-bin/show_pathway?hsa04024/hsa:3725%09red/hsa:1813%09red/hsa:1262%09red/hsa:2353%09red
Starch and sucrose metabolism	KEGG PATHWAY	hsa00500	2	36	0.00836087	0.0693914	MGAM|PYGL	http://www.genome.jp/kegg-bin/show_pathway?hsa00500/hsa:8972%09red/hsa:5836%09red
DNA replication	KEGG PATHWAY	hsa03030	2	36	0.00836087	0.0693914	JUNB|POLE3	http://www.genome.jp/kegg-bin/show_pathway?hsa03030/hsa:54107%09red/hsa:10535%09red
Serotonergic synapse	KEGG PATHWAY	hsa04726	3	115	0.00911384	0.0746092	HTR5A|KCNJ9|PTGS2	http://www.genome.jp/kegg-bin/show_pathway?hsa04726/hsa:5743%09red/hsa:3765%09red/hsa:3361%09red
Pyruvate metabolism	KEGG PATHWAY	hsa00620	2	39	0.00968359	0.0782069	ALDH3A2|ACSS1	http://www.genome.jp/kegg-bin/show_pathway?hsa00620/hsa:224%09red/hsa:84532%09red
AMPK signaling pathway	KEGG PATHWAY	hsa04152	3	120	0.0101987	0.0798602	CCNA2|CCN1|RAB14	http://www.genome.jp/kegg-bin/show_pathway?hsa04152/hsa:51552%09red/hsa:890%09red
Yersinia infection	KEGG PATHWAY	hsa05135	3	121	0.0104243	0.0805755	IL6|JUN|FOS	http://www.genome.jp/kegg-bin/show_pathway?hsa05135/hsa:3725%09red/hsa:3569%09red/hsa:2353%09red
Graft-versus-host disease	KEGG PATHWAY	hsa05332	2	41	0.0106136	0.0816884	IL6|IL1A	http://www.genome.jp/kegg-bin/show_pathway?hsa05332/hsa:3569%09red/hsa:3552%09red
Oocyte meiosis	KEGG PATHWAY	hsa04114	3	128	0.0120842	0.0903058	PLK1|CDK1|REC8	http://www.genome.jp/kegg-bin/show_pathway?hsa04114/hsa:9985%09red/hsa:983%09red/hsa:5347%09red
Dopaminergic synapse	KEGG PATHWAY	hsa04728	3	131	0.0128394	0.0947692	KCNJ9|DRD2|FOS	http://www.genome.jp/kegg-bin/show_pathway?hsa04728/hsa:1813%09red/hsa:2353%09red/hsa:3765%09red
Type II diabetes mellitus	KEGG PATHWAY	hsa04930	2	46	0.013103	0.0959287	PRKCE|SOCS3	http://www.genome.jp/kegg-bin/show_pathway?hsa04930/hsa:5581%09red/hsa:9021%09red
Nucleotide excision repair	KEGG PATHWAY	hsa03420	2	47	0.0136284	0.0985736	RAD23B|POLE3	http://www.genome.jp/kegg-bin/show_pathway?hsa03420/hsa:54107%09red/hsa:5887%09red
Insulin signaling pathway	KEGG PATHWAY	hsa04910	3	137	0.0144291	0.10231	PYGL|PPP1R3B|SOCS3	http://www.genome.jp/kegg-bin/show_pathway?hsa04910/hsa:79660%09red/hsa:5836%09red/hsa:9021%09red
Ubiquitin mediated proteolysis	KEGG PATHWAY	hsa04120	3	137	0.0144291	0.10231	UBE2C|UBE2L3|SOCS3	http://www.genome.jp/kegg-bin/show_pathway?hsa04120/hsa:11065%09red/hsa:7332%09red/hsa:9021%09red
Apelin signaling pathway	KEGG PATHWAY	hsa04371	3	137	0.0144291	0.10231	EGR1|PRKCE|CCN2	http://www.genome.jp/kegg-bin/show_pathway?hsa04371/hsa:1958%09red/hsa:5581%09red/hsa:1490%09red
Estrogen signaling pathway	KEGG PATHWAY	hsa04915	3	138	0.0147043	0.103059	KCNJ9|JUN|FOS	http://www.genome.jp/kegg-bin/show_pathway?hsa04915/hsa:3725%09red/hsa:2353%09red/hsa:3765%09red
Ovarian steroidogenesis	KEGG PATHWAY	hsa04913	2	49	0.0147064	0.103059	LHCGR|PTGS2	http://www.genome.jp/kegg-bin/show_pathway?hsa04913/hsa:5743%09red/hsa:3973%09red
Arginine and proline metabolism	KEGG PATHWAY	hsa00330	2	50	0.0152587	0.105696	ALDH3A2|CKMT2	http://www.genome.jp/kegg-bin/show_pathway?hsa00330/hsa:224%09red/hsa:1160%09red
Breast cancer	KEGG PATHWAY	hsa05224	3	147	0.0173158	0.117682	GADD45B|JUN|FOS	http://www.genome.jp/kegg-bin/show_pathway?hsa05224/hsa:3725%09red/hsa:2353%09red/hsa:4616%09red
Legionellosis	KEGG PATHWAY	hsa05134	2	55	0.0181513	0.12198	IL6|CXCL2	http://www.genome.jp/kegg-bin/show_pathway?hsa05134/hsa:3569%09red/hsa:2920%09red
Lysine degradation	KEGG PATHWAY	hsa00310	2	59	0.0206182	0.126686	ALDH3A2|SUV39H1	http://www.genome.jp/kegg-bin/show_pathway?hsa00310/hsa:6839%09red/hsa:224%09red
Jak-STAT signaling pathway	KEGG PATHWAY	hsa04630	3	162	0.0222071	0.130277	IL6|MCL1|SOCS3	http://www.genome.jp/kegg-bin/show_pathway?hsa04630/hsa:3569%09red/hsa:4170%09red/hsa:9021%09red
Influenza A	KEGG PATHWAY	hsa05164	3	167	0.0239877	0.13043	IL6|IL1A|SOCS3	http://www.genome.jp/kegg-bin/show_pathway?hsa05164/hsa:3569%09red/hsa:3552%09red/hsa:9021%09red
Glycolysis / Gluconeogenesis	KEGG PATHWAY	hsa00010	2	68	0.026642	0.136702	ALDH3A2|ACSS1	http://www.genome.jp/kegg-bin/show_pathway?hsa00010/hsa:224%09red/hsa:84532%09red
Epithelial cell signaling in Helicobacter pylori infection	KEGG PATHWAY	hsa05120	2	70	0.028066	0.138368	CXCL2|JUN	http://www.genome.jp/kegg-bin/show_pathway?hsa05120/hsa:3725%09red/hsa:2920%09red
Drug metabolism - cytochrome P450	KEGG PATHWAY	hsa00982	2	72	0.02952	0.142918	GSTM3|FMO4	http://www.genome.jp/kegg-bin/show_pathway?hsa00982/hsa:2329%09red/hsa:2947%09red
Bacterial invasion of epithelial cells	KEGG PATHWAY	hsa05100	2	74	0.0310034	0.147062	ARPC5L|DNM1	http://www.genome.jp/kegg-bin/show_pathway?hsa05100/hsa:1759%09red/hsa:81873%09red
Pancreatic cancer	KEGG PATHWAY	hsa05212	2	75	0.0317559	0.147062	GADD45B|RAD51	http://www.genome.jp/kegg-bin/show_pathway?hsa05212/hsa:5888%09red/hsa:4616%09red
Neuroactive ligand-receptor interaction	KEGG PATHWAY	hsa04080	4	338	0.0360082	0.156267	LHCGR|AVPR2|DRD2|HTR5A	http://www.genome.jp/kegg-bin/show_pathway?hsa04080/hsa:1813%09red/hsa:554%09red/hsa:3973%09red/hsa:3361%09red
B cell receptor signaling pathway	KEGG PATHWAY	hsa04662	2	82	0.0372215	0.15972	JUN|FOS	http://www.genome.jp/kegg-bin/show_pathway?hsa04662/hsa:3725%09red/hsa:2353%09red
Chemical carcinogenesis	KEGG PATHWAY	hsa05204	2	82	0.0372215	0.15972	PTGS2|GSTM3	http://www.genome.jp/kegg-bin/show_pathway?hsa05204/hsa:5743%09red/hsa:2947%09red
Gap junction	KEGG PATHWAY	hsa04540	2	88	0.0421704	0.169896	CDK1|DRD2	http://www.genome.jp/kegg-bin/show_pathway?hsa04540/hsa:1813%09red/hsa:983%09red
PD-L1 expression and PD-1 checkpoint pathway in cancer	KEGG PATHWAY	hsa05235	2	89	0.043018	0.171406	JUN|FOS	http://www.genome.jp/kegg-bin/show_pathway?hsa05235/hsa:3725%09red/hsa:2353%09red
Human immunodeficiency virus 1 infection	KEGG PATHWAY	hsa05170	3	212	0.043364	0.172023	CDK1|JUN|FOS	http://www.genome.jp/kegg-bin/show_pathway?hsa05170/hsa:3725%09red/hsa:983%09red/hsa:2353%09red
Protein digestion and absorption	KEGG PATHWAY	hsa04974	2	90	0.043872	0.173275	COL4A5|COL4A4	http://www.genome.jp/kegg-bin/show_pathway?hsa04974/hsa:1287%09red/hsa:1286%09red
Hypertrophic cardiomyopathy (HCM)	KEGG PATHWAY	hsa05410	2	90	0.043872	0.173275	IL6|LAMA2	http://www.genome.jp/kegg-bin/show_pathway?hsa05410/hsa:3569%09red/hsa:3908%09red
Th1 and Th2 cell differentiation	KEGG PATHWAY	hsa04658	2	92	0.0455987	0.17369	JUN|FOS	http://www.genome.jp/kegg-bin/show_pathway?hsa04658/hsa:3725%09red/hsa:2353%09red
GnRH signaling pathway	KEGG PATHWAY	hsa04912	2	93	0.0464713	0.175304	EGR1|JUN	http://www.genome.jp/kegg-bin/show_pathway?hsa04912/hsa:3725%09red/hsa:1958%09red
Fc gamma R-mediated phagocytosis	KEGG PATHWAY	hsa04666	2	94	0.0473501	0.178033	ARPC5L|PRKCE	http://www.genome.jp/kegg-bin/show_pathway?hsa04666/hsa:5581%09red/hsa:81873%09red
Endocrine resistance	KEGG PATHWAY	hsa01522	2	98	0.0509255	0.18833	JUN|FOS	http://www.genome.jp/kegg-bin/show_pathway?hsa01522/hsa:3725%09red/hsa:2353%09red
Choline metabolism in cancer	KEGG PATHWAY	hsa05231	2	99	0.0518341	0.190876	JUN|FOS	http://www.genome.jp/kegg-bin/show_pathway?hsa05231/hsa:3725%09red/hsa:2353%09red
Viral protein interaction with cytokine and cytokine receptor	KEGG PATHWAY	hsa04061	2	100	0.0527485	0.190876	IL6|CXCL2	http://www.genome.jp/kegg-bin/show_pathway?hsa04061/hsa:3569%09red/hsa:2920%09red
T cell receptor signaling pathway	KEGG PATHWAY	hsa04660	2	103	0.055526	0.199208	JUN|FOS	http://www.genome.jp/kegg-bin/show_pathway?hsa04660/hsa:3725%09red/hsa:2353%09red
Glucagon signaling pathway	KEGG PATHWAY	hsa04922	2	106	0.0583538	0.204861	PYGL|SIK1	http://www.genome.jp/kegg-bin/show_pathway?hsa04922/hsa:102724428%09red/hsa:5836%09red
Cholinergic synapse	KEGG PATHWAY	hsa04725	2	112	0.0641548	0.211617	KCNJ12|FOS	http://www.genome.jp/kegg-bin/show_pathway?hsa04725/hsa:3768%09red/hsa:2353%09red
Glycosaminoglycan biosynthesis - chondroitin sulfate / dermatan sulfate	KEGG PATHWAY	hsa00532	1	20	0.073107	0.22497	UST	http://www.genome.jp/kegg-bin/show_pathway?hsa00532/hsa:10090%09red
Terpenoid backbone biosynthesis	KEGG PATHWAY	hsa00900	1	22	0.0797858	0.237511	IDI1	http://www.genome.jp/kegg-bin/show_pathway?hsa00900/hsa:3422%09red
Olfactory transduction	KEGG PATHWAY	hsa04740	4	448	0.0819835	0.240092	OR52W1|CNGA4|RGS2|OR9A4	http://www.genome.jp/kegg-bin/show_pathway?hsa04740/hsa:130075%09red/hsa:1262%09red/hsa:5997%09red/hsa:120787%09red
Histidine metabolism	KEGG PATHWAY	hsa00340	1	23	0.0831072	0.240092	ALDH3A2	http://www.genome.jp/kegg-bin/show_pathway?hsa00340/hsa:224%09red
Cytokine-cytokine receptor interaction	KEGG PATHWAY	hsa04060	3	294	0.0931096	0.256708	IL6|IL1A|CXCL2	http://www.genome.jp/kegg-bin/show_pathway?hsa04060/hsa:3569%09red/hsa:3552%09red/hsa:2920%09red
Signaling pathways regulating pluripotency of stem cells	KEGG PATHWAY	hsa04550	2	140	0.0935039	0.256708	KLF4|POU5F1B	http://www.genome.jp/kegg-bin/show_pathway?hsa04550/hsa:5462%09red/hsa:9314%09red
Parkinson disease	KEGG PATHWAY	hsa05012	2	142	0.0957273	0.260345	DRD2|UBE2L3	http://www.genome.jp/kegg-bin/show_pathway?hsa05012/hsa:1813%09red/hsa:7332%09red
Biosynthesis of unsaturated fatty acids	KEGG PATHWAY	hsa01040	1	27	0.0962741	0.260345	ELOVL5	http://www.genome.jp/kegg-bin/show_pathway?hsa01040/hsa:60481%09red
Fatty acid elongation	KEGG PATHWAY	hsa00062	1	27	0.0962741	0.260345	ELOVL5	http://www.genome.jp/kegg-bin/show_pathway?hsa00062/hsa:60481%09red
Ascorbate and aldarate metabolism	KEGG PATHWAY	hsa00053	1	27	0.0962741	0.260345	ALDH3A2	http://www.genome.jp/kegg-bin/show_pathway?hsa00053/hsa:224%09red
Retrograde endocannabinoid signaling	KEGG PATHWAY	hsa04723	2	148	0.102487	0.270642	PTGS2|KCNJ9	http://www.genome.jp/kegg-bin/show_pathway?hsa04723/hsa:5743%09red/hsa:3765%09red
Phospholipase D signaling pathway	KEGG PATHWAY	hsa04072	2	148	0.102487	0.270642	AVPR2|DNM1	http://www.genome.jp/kegg-bin/show_pathway?hsa04072/hsa:1759%09red/hsa:554%09red
Hippo signaling pathway - multiple species	KEGG PATHWAY	hsa04392	1	29	0.102787	0.270642	RASSF6	http://www.genome.jp/kegg-bin/show_pathway?hsa04392/hsa:166824%09red
Herpes simplex virus 1 infection	KEGG PATHWAY	hsa05168	4	492	0.105829	0.275544	IL6|ZNF846|SOCS3|ZNF559	http://www.genome.jp/kegg-bin/show_pathway?hsa05168/hsa:3569%09red/hsa:162993%09red/hsa:84527%09red/hsa:9021%09red
Glyoxylate and dicarboxylate metabolism	KEGG PATHWAY	hsa00630	1	30	0.106026	0.275544	ACSS1	http://www.genome.jp/kegg-bin/show_pathway?hsa00630/hsa:84532%09red
Galactose metabolism	KEGG PATHWAY	hsa00052	1	31	0.109253	0.279405	MGAM	http://www.genome.jp/kegg-bin/show_pathway?hsa00052/hsa:8972%09red
Antifolate resistance	KEGG PATHWAY	hsa01523	1	31	0.109253	0.279405	IL6	http://www.genome.jp/kegg-bin/show_pathway?hsa01523/hsa:3569%09red
Circadian rhythm	KEGG PATHWAY	hsa04710	1	31	0.109253	0.279405	PER1	http://www.genome.jp/kegg-bin/show_pathway?hsa04710/hsa:5187%09red
Hippo signaling pathway	KEGG PATHWAY	hsa04390	2	154	0.109373	0.279405	CCN2|RASSF6	http://www.genome.jp/kegg-bin/show_pathway?hsa04390/hsa:166824%09red/hsa:1490%09red
Cushing syndrome	KEGG PATHWAY	hsa04934	2	155	0.110532	0.281569	NR4A1|RASD1	http://www.genome.jp/kegg-bin/show_pathway?hsa04934/hsa:3164%09red/hsa:51655%09red
beta-Alanine metabolism	KEGG PATHWAY	hsa00410	1	33	0.115672	0.286162	ALDH3A2	http://www.genome.jp/kegg-bin/show_pathway?hsa00410/hsa:224%09red
Necroptosis	KEGG PATHWAY	hsa04217	2	162	0.118738	0.291656	IL1A|PYGL	http://www.genome.jp/kegg-bin/show_pathway?hsa04217/hsa:3552%09red/hsa:5836%09red
Propanoate metabolism	KEGG PATHWAY	hsa00640	1	34	0.118865	0.291656	ACSS1	http://www.genome.jp/kegg-bin/show_pathway?hsa00640/hsa:84532%09red
Protein processing in endoplasmic reticulum	KEGG PATHWAY	hsa04141	2	165	0.1223	0.296849	PPP1R15A|RAD23B	http://www.genome.jp/kegg-bin/show_pathway?hsa04141/hsa:23645%09red/hsa:5887%09red
cGMP-PKG signaling pathway	KEGG PATHWAY	hsa04022	2	167	0.124689	0.300684	PRKCE|RGS2	http://www.genome.jp/kegg-bin/show_pathway?hsa04022/hsa:5997%09red/hsa:5581%09red
Hepatocellular carcinoma	KEGG PATHWAY	hsa05225	2	168	0.125888	0.301896	GADD45B|GSTM3	http://www.genome.jp/kegg-bin/show_pathway?hsa05225/hsa:4616%09red/hsa:2947%09red
Tight junction	KEGG PATHWAY	hsa04530	2	170	0.128294	0.304613	PRKCE|JUN	http://www.genome.jp/kegg-bin/show_pathway?hsa04530/hsa:3725%09red/hsa:5581%09red
Thyroid cancer	KEGG PATHWAY	hsa05216	1	37	0.128374	0.304613	GADD45B	http://www.genome.jp/kegg-bin/show_pathway?hsa05216/hsa:4616%09red
Aldosterone-regulated sodium reabsorption	KEGG PATHWAY	hsa04960	1	37	0.128374	0.304613	SGK1	http://www.genome.jp/kegg-bin/show_pathway?hsa04960/hsa:6446%09red
Glycine, serine and threonine metabolism	KEGG PATHWAY	hsa00260	1	40	0.137781	0.314902	ALAS2	http://www.genome.jp/kegg-bin/show_pathway?hsa00260/hsa:212%09red
Tuberculosis	KEGG PATHWAY	hsa05152	2	179	0.13925	0.317385	IL6|IL1A	http://www.genome.jp/kegg-bin/show_pathway?hsa05152/hsa:3569%09red/hsa:3552%09red
Alcoholism	KEGG PATHWAY	hsa05034	2	180	0.14048	0.317385	FOSB|DRD2	http://www.genome.jp/kegg-bin/show_pathway?hsa05034/hsa:1813%09red/hsa:2354%09red
Homologous recombination	KEGG PATHWAY	hsa03440	1	41	0.140894	0.317385	RAD51	http://www.genome.jp/kegg-bin/show_pathway?hsa03440/hsa:5888%09red
[truncated: 1,672 more rows]
